# Supplementary material for: The Lsm1-7/Pat1 complex binds to stress-activated mRNAs and modulates the response to hyperosmotic shock
Source: PubMed Central journal article supplement (PMC6085073; doi:10.1371/journal.pgen.1007563), 2018-07-30

## Supplementary Fig. S2

### Intracellular localization of the MS2L-mRNAs

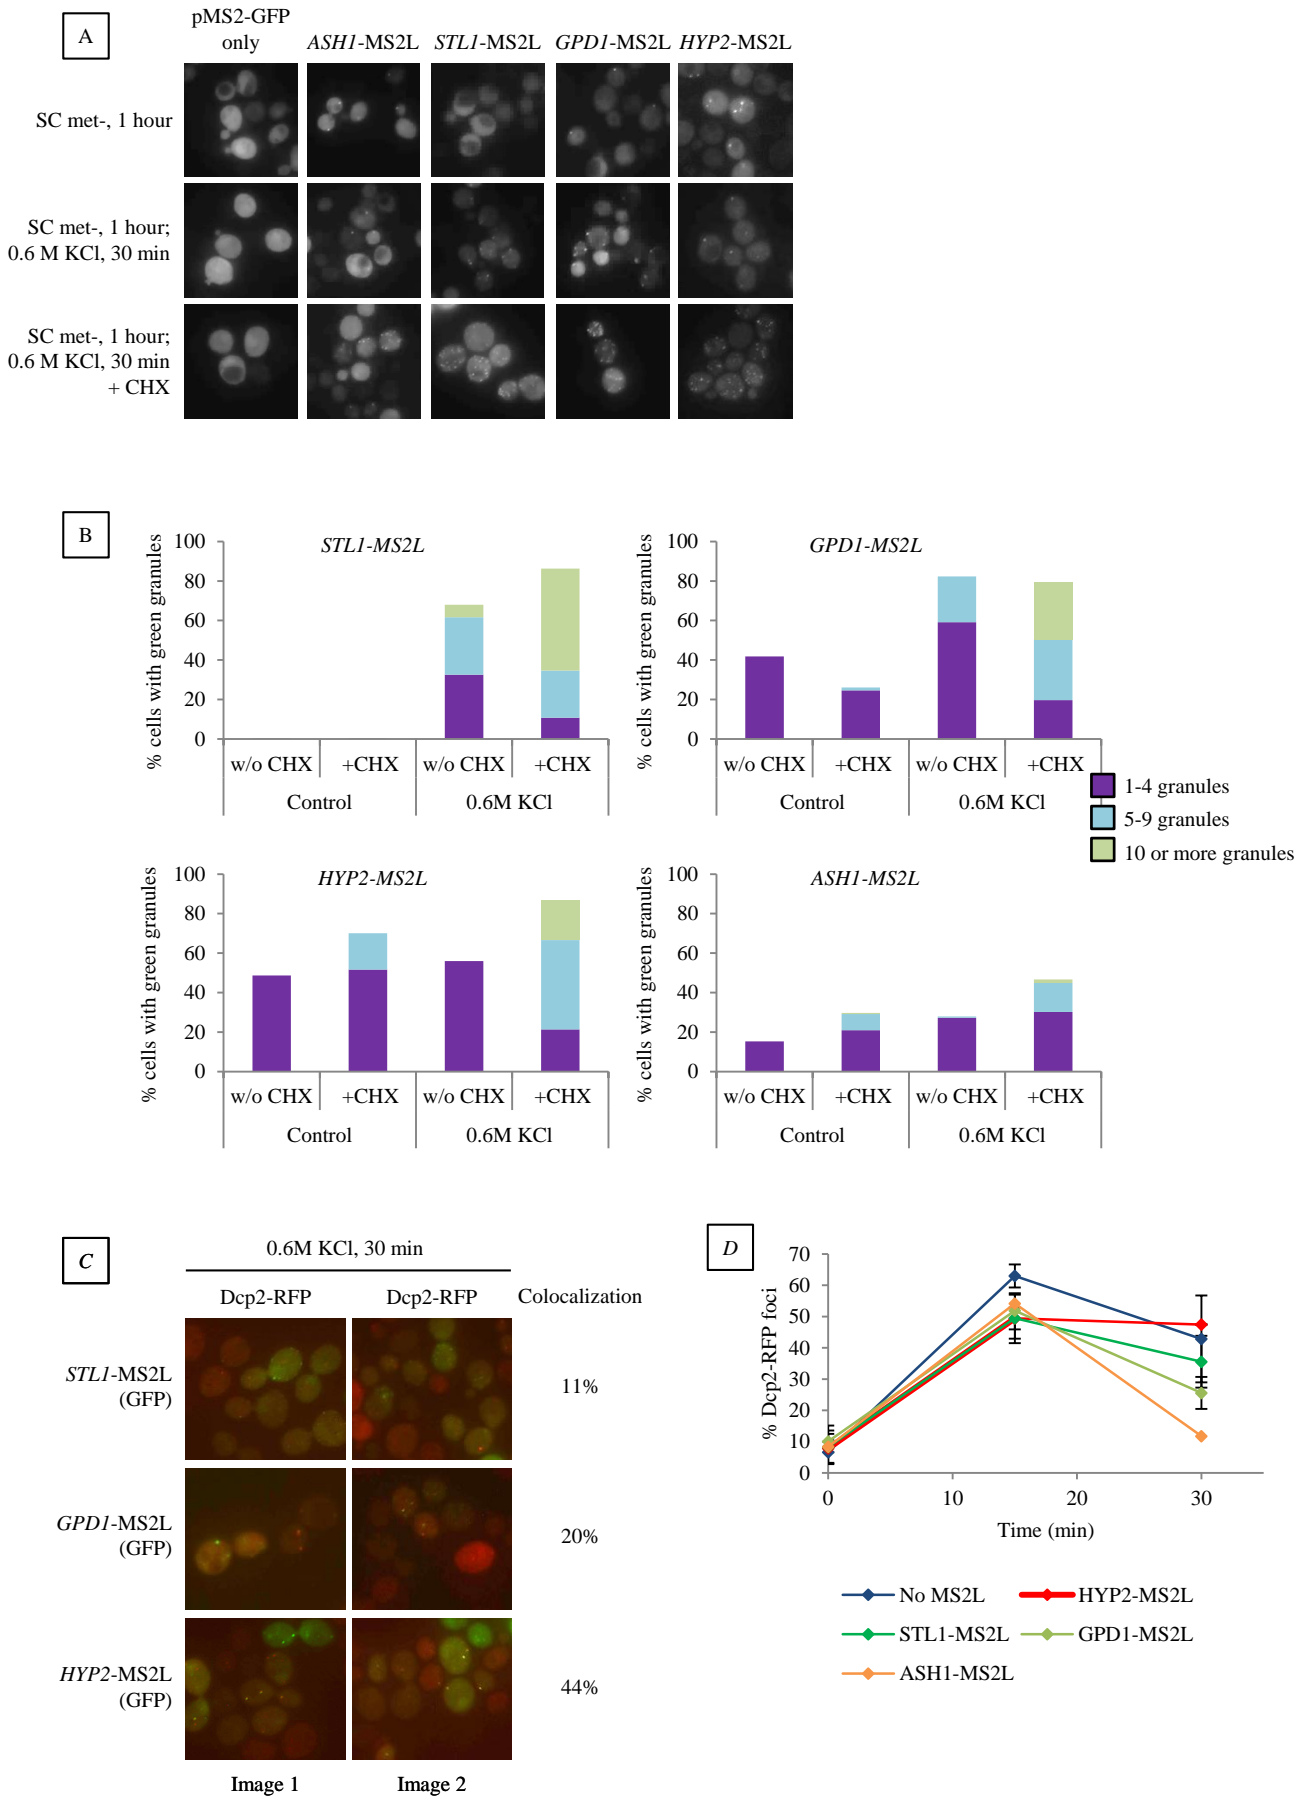

Supplement: pgen.1007563.s002.pdf [file pgen.1007563.s002.pdf]
