# Supplementary material for: The Lsm1-7/Pat1 complex binds to stress-activated mRNAs and modulates the response to hyperosmotic shock
Source: PubMed Central journal article supplement (PMC6085073; doi:10.1371/journal.pgen.1007563), 2018-07-30

### Supplementary Fig. S3

Testing the RNP capture  
using *ASH1-MS2L* strain

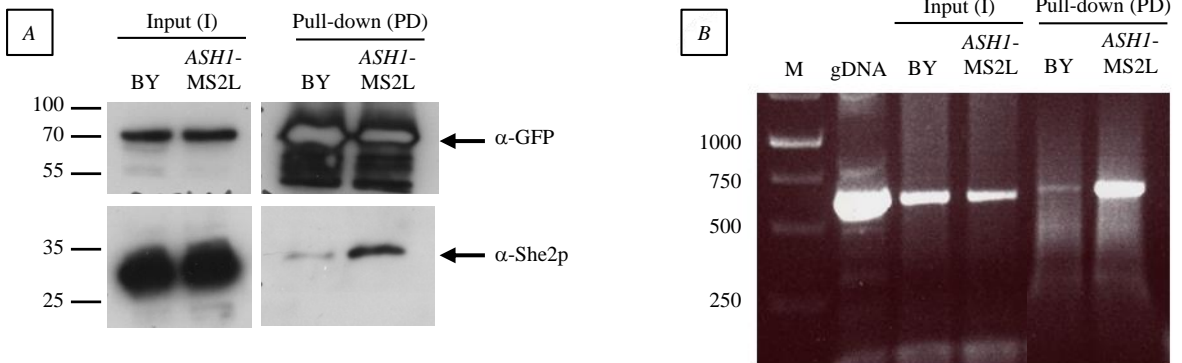

Supplement: pgen.1007563.s003.pdf [file pgen.1007563.s003.pdf]
