# Supplementary material for: The Lsm1-7/Pat1 complex binds to stress-activated mRNAs and modulates the response to hyperosmotic shock
Source: PubMed Central journal article supplement (PMC6085073; doi:10.1371/journal.pgen.1007563), 2018-07-30

### Supplementary Fig. S4

Association of *HYP2* mRNA to polysomal profiles after 30 min of 0.6 M KCl in the presence of CHX

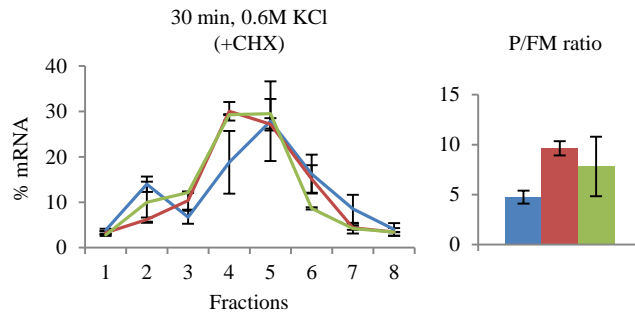

Supplement: pgen.1007563.s004.pdf [file pgen.1007563.s004.pdf]
