# Supplementary material for: The Lsm1-7/Pat1 complex binds to stress-activated mRNAs and modulates the response to hyperosmotic shock
Source: PubMed Central journal article supplement (PMC6085073; doi:10.1371/journal.pgen.1007563), 2018-07-30

### Supplementary Fig. S5

- A) Polysome profiles of a time course experiment under osmotic stress (0.6 M KCl) in *pat1* mutant and wt strains  
 B) Detection of specific mRNA association to the fractions along the gradient by qPCR

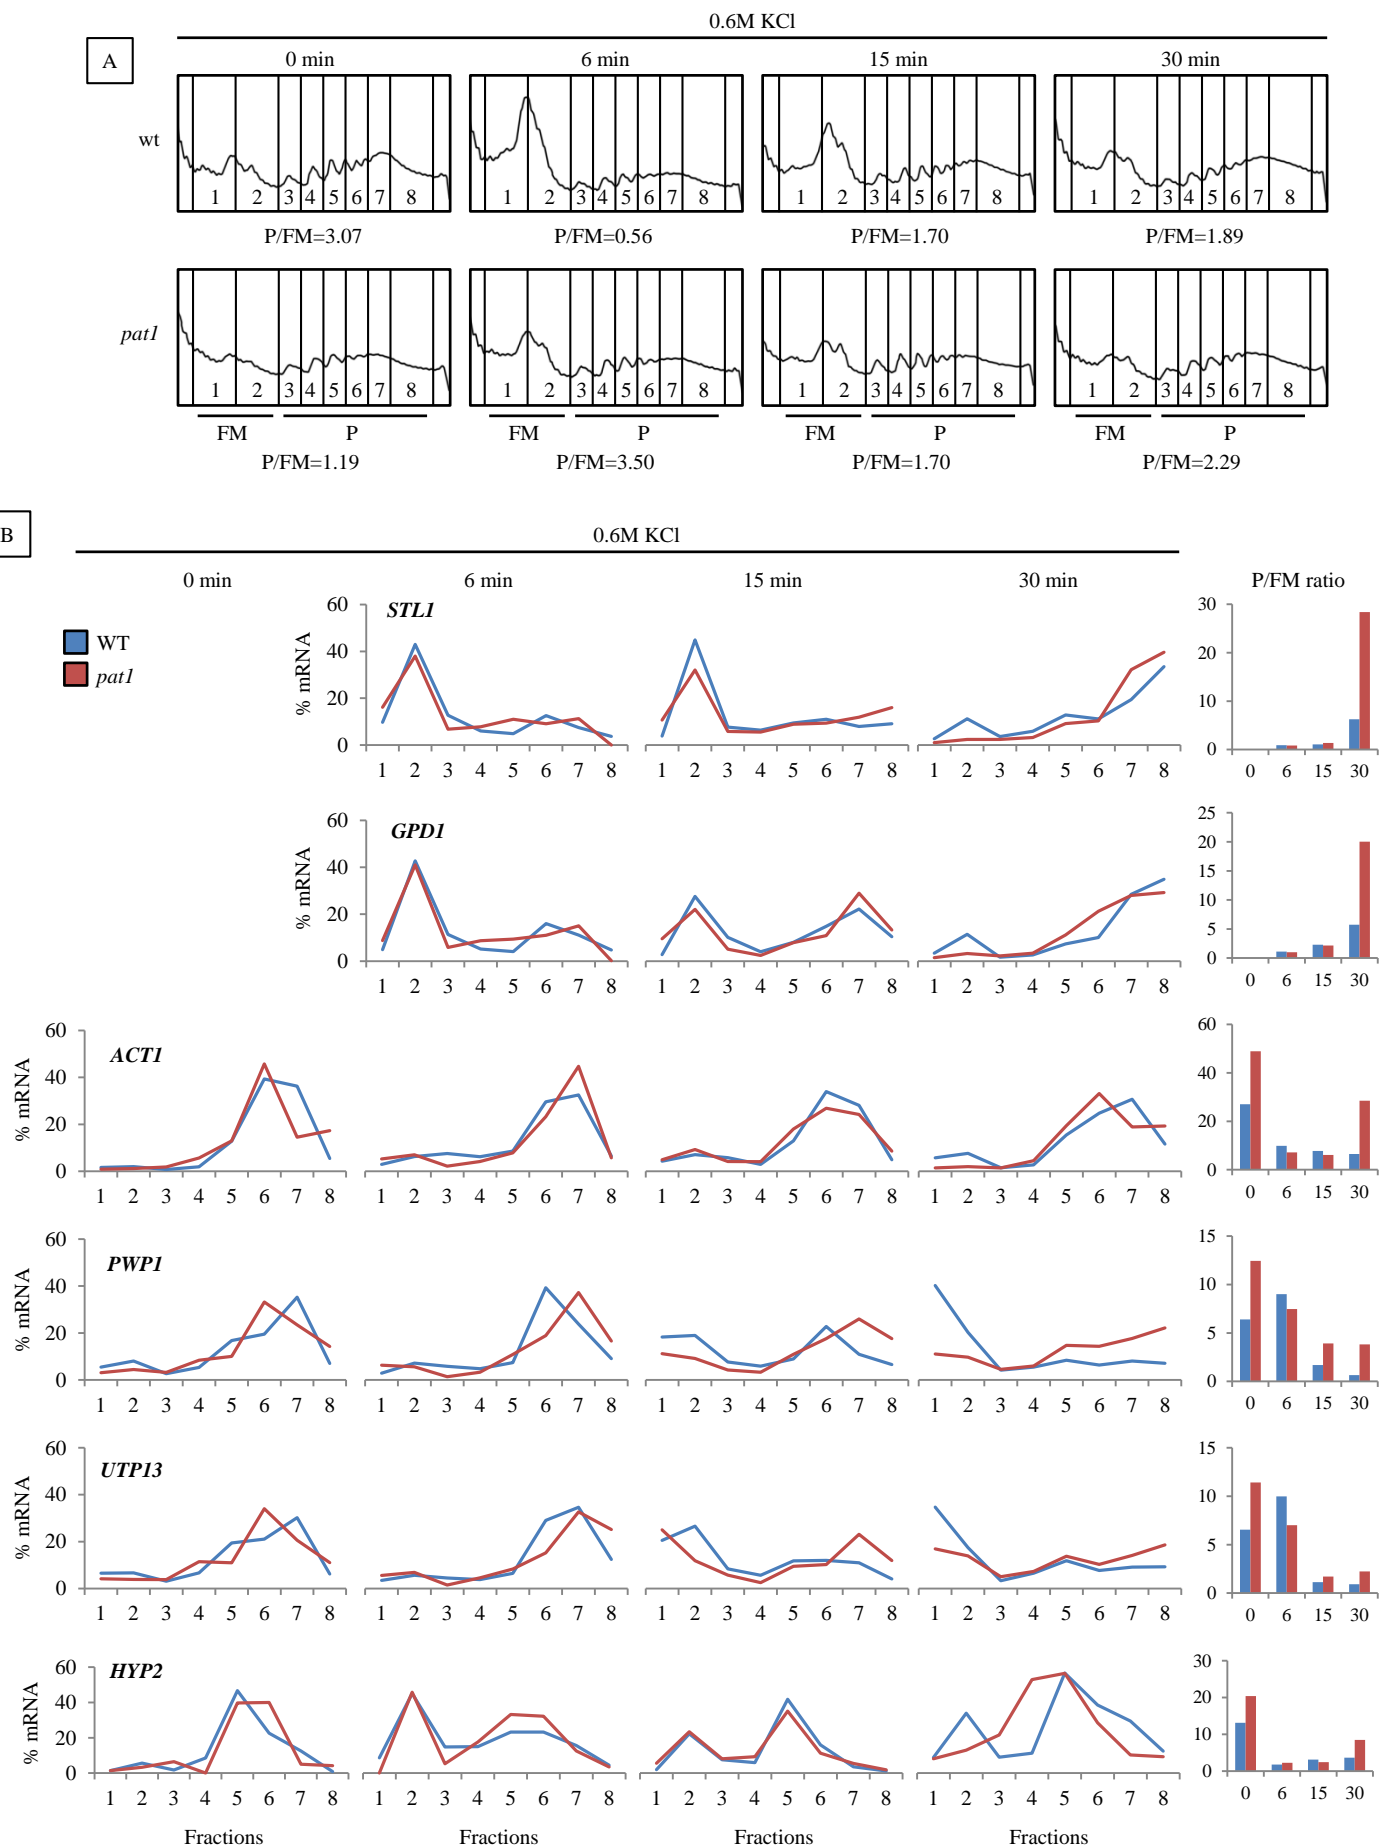

Supplement: pgen.1007563.s005.pdf [file pgen.1007563.s005.pdf]
