# Supplementary material for: The Lsm1-7/Pat1 complex binds to stress-activated mRNAs and modulates the response to hyperosmotic shock
Source: PubMed Central journal article supplement (PMC6085073; doi:10.1371/journal.pgen.1007563), 2018-07-30

### Supplementary Fig. S6

mRNA levels from GFP-tagged strains for the same genes for which the levels of tagged proteins were assayed under osmotic stress in Fig. 4

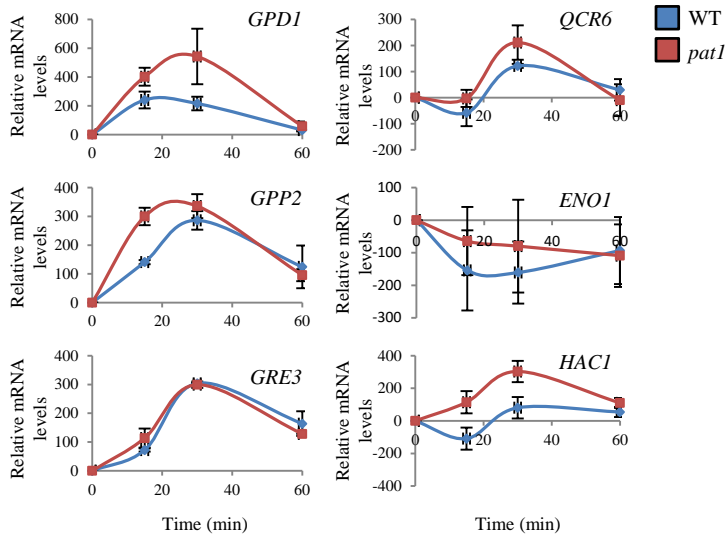

Supplement: pgen.1007563.s006.pdf [file pgen.1007563.s006.pdf]
