# Supplementary material for: The Lsm1-7/Pat1 complex binds to stress-activated mRNAs and modulates the response to hyperosmotic shock
Source: PubMed Central journal article supplement (PMC6085073; doi:10.1371/journal.pgen.1007563), 2018-07-30

## Supplementary Fig. S7

A) Histograms showing the total number of 5P-seq reads in each reading frame in the 5'UTR  
 B) Scatter plots displaying 5P-seq values for *lsm1* mutant (Y-axis) and wt (X-axis) strains

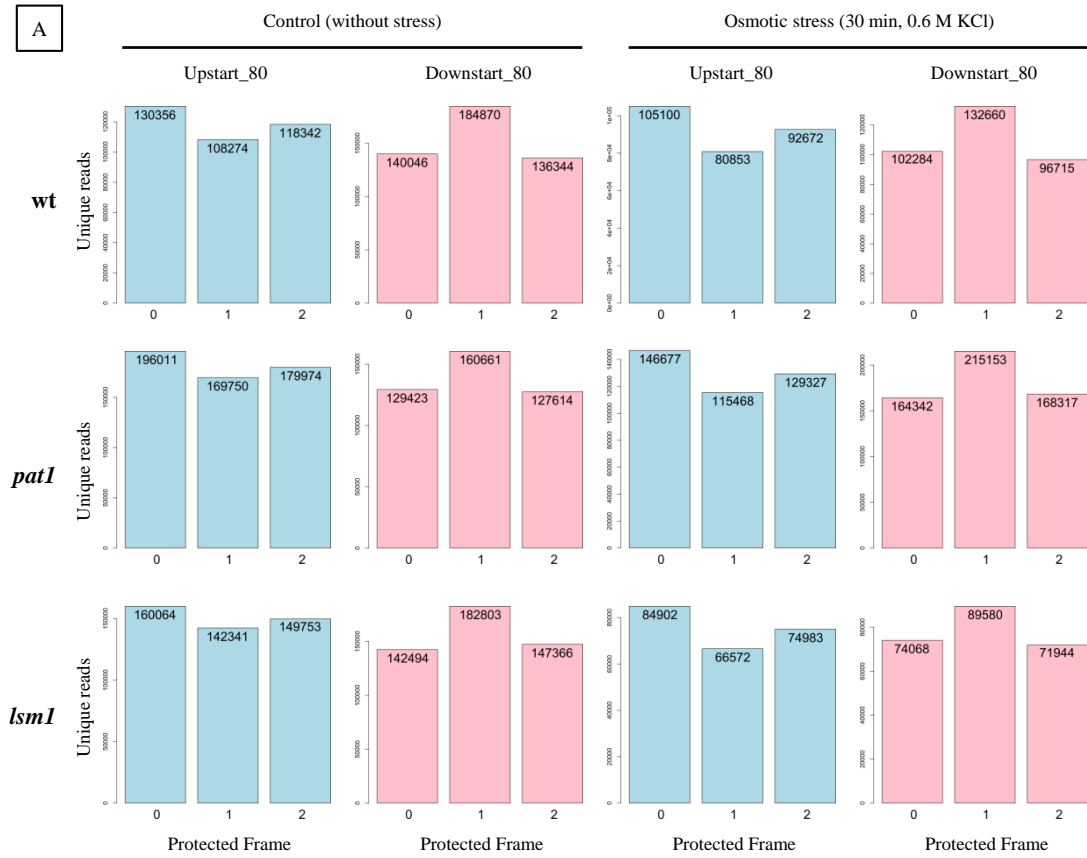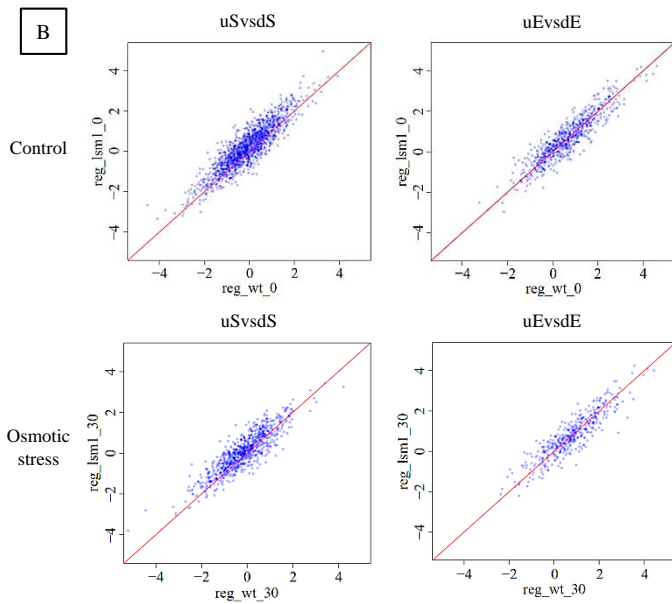

Supplement: pgen.1007563.s007.pdf [file pgen.1007563.s007.pdf]
