# Supplementary material for: The Lsm1-7/Pat1 complex binds to stress-activated mRNAs and modulates the response to hyperosmotic shock
Source: PLoS Genet. 2018 Jul 30;14(7):e1007563. doi: 10.1371/journal.pgen.1007563 (PMC6085073; doi:10.1371/journal.pgen.1007563)
Supplement: S3 Dataset — (XLSX) [file pgen.1007563.s018.xlsx]

## Sheet: legend
gene	gene
wt_0_uSvsddS	Log2( reads in uS /reads in ddS)
wt_30_uSvsddS	Log2( reads in uS /reads in ddS)
lsm1_0_uSvsddS	Log2( reads in uS /reads in ddS)
lsm1_30_uSvsddS	Log2( reads in uS /reads in ddS)
pat1_0_uSvsddS	Log2( reads in uS /reads in ddS)
pat1_30_uSvsddS	Log2( reads in uS /reads in ddS)
wt_0_uSvsddS_f	Pass filtering criteria for comparisson (minimum 20 reads in each region)
wt_30_uSvsddS_f	Pass filtering criteria for comparisson (minimum 20 reads in each region)
lsm1_0_uSvsddS_f	Pass filtering criteria for comparisson (minimum 20 reads in each region)
lsm1_30_uSvsddS_f	Pass filtering criteria for comparisson (minimum 20 reads in each region)
pat1_0_uSvsddS_f	Pass filtering criteria for comparisson (minimum 20 reads in each region)
pat1_30_uSvsddS_f	Pass filtering criteria for comparisson (minimum 20 reads in each region)
Only genes passing the filtering criteria for each comparison were used for the analysis
All replicates were combine to compute the total number of reads
The graphics include the representation of the start region division in three windows of 45 nt each, upstream of the start codon (uS), downstream of the start codon including the ribosome paused at the start (dS) and, downstream of dS region (ddS); and the stop region in two windows, upstream of the stop codon including the ribosome paused at the stop (uE), and downstream of the stop (dE).

## Sheet: uSvsdS
gene	wt_0_uSvsdS	wt_30_uSvsdS	lsm1_0_uSvsdS	lsm1_30_uSvsdS	pat1_0_uSvsdS	pat1_30_uSvsdS	wt_0_uSvsdS_f	wt_30_uSvsdS_f	lsm1_0_uSvsdS_f	lsm1_30_uSvsdS_f	pat1_0_uSvsdS_f	pat1_30_uSvsdS_f
YAL068C	NA	NA	NA	NA	NA	NA	FALSE	FALSE	FALSE	FALSE	FALSE	FALSE
YAL067W-A	NA	NA	NA	NA	NA	NA	FALSE	FALSE	FALSE	FALSE	FALSE	FALSE
YAL067C	-0.584963	NA	NA	NA	NA	NA	FALSE	FALSE	FALSE	FALSE	FALSE	FALSE
YAL065C	NA	NA	NA	NA	NA	NA	FALSE	FALSE	FALSE	FALSE	FALSE	FALSE
YAL064W-B	NA	-2	NA	-2.32193	NA	NA	FALSE	FALSE	FALSE	FALSE	FALSE	FALSE
YAL064C-A	NA	NA	NA	NA	NA	NA	FALSE	FALSE	FALSE	FALSE	FALSE	FALSE
YAL064W	NA	NA	NA	0	NA	NA	FALSE	FALSE	FALSE	FALSE	FALSE	FALSE
YAL063C-A	NA	NA	NA	NA	NA	NA	FALSE	FALSE	FALSE	FALSE	FALSE	FALSE
YAL063C	NA	NA	NA	NA	NA	NA	FALSE	FALSE	FALSE	FALSE	FALSE	FALSE
YAL062W	-1	NA	-1.58496	NA	-1	1	FALSE	FALSE	FALSE	FALSE	FALSE	FALSE
YAL061W	-1.83227	-1.19833	-1.27009	-0.968973	-1.13993	-0.476438	TRUE	TRUE	TRUE	TRUE	TRUE	TRUE
YAL060W	-0.941106	-1.05063	-1.72583	-0.652077	-0.469485	-1	TRUE	TRUE	FALSE	TRUE	TRUE	TRUE
YAL059W	NA	NA	-5.90689	-4.90689	NA	-4.70044	FALSE	FALSE	FALSE	FALSE	FALSE	FALSE
YAL058W	NA	2.16993	1.26303	1.58496	1.5025	2.58496	FALSE	FALSE	FALSE	FALSE	FALSE	FALSE
YAL056W	0.874469	-0.628031	1.12553	-0.152003	1.24793	1	FALSE	FALSE	FALSE	FALSE	FALSE	FALSE
YAL055W	-2.45943	-1.94753	-2.58496	-3.58496	-1.46949	-1.078	FALSE	FALSE	FALSE	FALSE	FALSE	FALSE
YAL054C	0.584963	0	-0.736966	2	NA	NA	FALSE	FALSE	FALSE	FALSE	FALSE	FALSE
YAL053W	-0.0824622	-1.61891	-1.58496	-0.485427	-0.285402	-0.36257	TRUE	FALSE	FALSE	FALSE	TRUE	TRUE
YAL051W	0.152003	-0.0565835	0.0489096	0.624491	0.289507	0.209453	TRUE	TRUE	TRUE	TRUE	TRUE	TRUE
YAL049C	-0.387023	1.09954	1.96963	0.514573	1.04439	1.36257	FALSE	FALSE	FALSE	FALSE	FALSE	FALSE
YAL048C	NA	NA	-2.45943	NA	NA	NA	FALSE	FALSE	FALSE	FALSE	FALSE	FALSE
YAL047C	-1.26303	NA	0.321928	-2.32193	-0.584963	-1	FALSE	FALSE	FALSE	FALSE	FALSE	FALSE
YAL046C	-3.16993	NA	-4.24793	-3	-4.20945	-5.08746	FALSE	FALSE	FALSE	FALSE	FALSE	FALSE
YAL044W-A	-1.06274	-0.82103	-1.09464	-0.68966	-0.411314	-1.27085	TRUE	TRUE	TRUE	TRUE	TRUE	TRUE
YAL044C	-3.61471	-3.03342	-4.25634	-3.87447	-2.95936	-4.52356	FALSE	FALSE	FALSE	FALSE	FALSE	FALSE
YAL043C	-0.584963	1.48543	-1.41504	1.58496	0.378512	0	FALSE	FALSE	FALSE	FALSE	TRUE	FALSE
YAL042W	1.87447	1.06817	2.75946	2.26303	2.56478	1.86673	TRUE	TRUE	TRUE	FALSE	TRUE	TRUE
YAL041W	0.906891	0.321928	0.917538	-0.263034	1.47393	-0.823122	FALSE	FALSE	FALSE	FALSE	FALSE	FALSE
YAL040C	-0.5025	-1.07039	-1	-0.917538	0.106915	-0.954196	FALSE	FALSE	FALSE	FALSE	FALSE	FALSE
YAL039C	-0.698619	-0.895303	0.430634	-0.530515	0.684498	0.119299	TRUE	TRUE	TRUE	TRUE	TRUE	TRUE
YAL038W	-1.08078	-1.13797	-0.871734	-0.665581	-0.845705	-0.984946	TRUE	TRUE	TRUE	TRUE	TRUE	TRUE
YAL037C-A	NA	NA	NA	NA	NA	NA	FALSE	FALSE	FALSE	FALSE	FALSE	FALSE
YAL037W	-0.736966	-0.736966	-1.35364	0.192645	-1.76553	-1.41504	FALSE	FALSE	FALSE	FALSE	FALSE	FALSE
YAL036C	0.814444	-0.192645	0.980371	0.621488	0.890376	0.137504	TRUE	FALSE	TRUE	FALSE	TRUE	TRUE
YAL035W	1.29905	0.959358	1.94611	1.04731	1.63904	0.509014	TRUE	TRUE	TRUE	TRUE	TRUE	TRUE
YAL034W-A	3.16993	0	2.39232	2.32193	2.73697	0.807355	FALSE	FALSE	FALSE	FALSE	FALSE	FALSE
YAL034C	0.469485	1.84435	1.35755	3.18133	1.04182	2.53119	FALSE	TRUE	FALSE	FALSE	FALSE	TRUE
YAL033W	-0.321928	NA	-1.26303	-2.58496	-2.22239	2.32193	FALSE	FALSE	FALSE	FALSE	FALSE	FALSE
YAL032C	1.1822	2.72247	1.75002	1.47805	1.05184	2.10692	TRUE	FALSE	TRUE	FALSE	TRUE	FALSE
YAL031C	-0.469485	-0.796467	-0.180572	-1.08746	0.793549	0.184425	FALSE	FALSE	FALSE	FALSE	FALSE	TRUE
YAL030W	0.255257	-0.378512	0.53842	0.321928	0.664816	0.27684	TRUE	TRUE	TRUE	TRUE	TRUE	TRUE
YAL030W	NA	NA	NA	NA	NA	NA	FALSE	FALSE	FALSE	FALSE	FALSE	FALSE
YAL029C	-0.602665	-0.0687128	-0.934905	-1.63227	-0.621488	-0.423808	TRUE	TRUE	TRUE	FALSE	TRUE	TRUE
YAL028W	2.80735	0.31034	0.847997	0.387023	0.584963	0.938599	FALSE	TRUE	FALSE	FALSE	FALSE	TRUE
YAL027W	0.893085	0.874469	-0.206451	-1.22239	0.584963	0.584963	FALSE	FALSE	FALSE	FALSE	FALSE	FALSE
YAL026C	-0.584963	-2.24793	-1.45943	-0.678072	-1.71621	-0.530515	FALSE	FALSE	FALSE	FALSE	FALSE	FALSE
YAL025C	0.496426	1	1.822	-0.485427	1.25054	1.90689	TRUE	FALSE	TRUE	FALSE	TRUE	FALSE
YAL024C	-1.28011	-0.736966	-1.1375	NA	-1.73697	-1	FALSE	FALSE	FALSE	FALSE	FALSE	FALSE
YAL023C	-1.02106	-1.75899	-1.22741	-1.80735	-1.18556	-0.724366	TRUE	FALSE	TRUE	FALSE	TRUE	TRUE
YAL022C	0.584963	-0.906891	0.628031	0.289507	0.685891	0.440573	FALSE	FALSE	TRUE	FALSE	TRUE	FALSE
YAL021C	1.6939	0.884523	1.71989	2.5025	1.70044	0.793549	FALSE	FALSE	FALSE	FALSE	TRUE	FALSE
YAL020C	-2.07039	-3.05889	-2.70044	-3.23704	-1.65208	-2	FALSE	FALSE	FALSE	FALSE	TRUE	FALSE
YAL019W	-0.610053	-0.736966	-0.807355	0	-0.688056	-1.16993	FALSE	FALSE	FALSE	FALSE	FALSE	FALSE
YAL018C	NA	-1	NA	0	NA	NA	FALSE	FALSE	FALSE	FALSE	FALSE	FALSE
YAL017W	0.678072	-0.338802	0.283793	-0.752072	-0.36257	-0.415037	FALSE	TRUE	TRUE	FALSE	TRUE	TRUE
YAL016W	-0.70044	-1.1635	-0.545434	-0.201634	-0.415037	0.201634	TRUE	TRUE	TRUE	TRUE	TRUE	TRUE
YAL015C	NA	NA	NA	-4.16993	NA	-3.58496	FALSE	FALSE	FALSE	FALSE	FALSE	FALSE
YAL014C	-0.118644	0.807355	1.1635	2.28011	1.79008	1.55943	TRUE	TRUE	TRUE	FALSE	TRUE	FALSE
YAL013W	1.11548	0.945552	1.2854	1.41504	1.34958	1.36257	TRUE	TRUE	TRUE	FALSE	TRUE	TRUE
YAL012W	-0.283172	0.073249	0.0473057	-0.0631938	0.124258	0.215389	TRUE	TRUE	TRUE	TRUE	TRUE	TRUE
YAL011W	-2.43296	NA	-1	-0.847997	-1.89308	-1.28011	FALSE	FALSE	FALSE	FALSE	FALSE	FALSE
YAL010C	1.41504	1.77259	2.11548	0.932886	3.07529	1.87447	FALSE	FALSE	FALSE	FALSE	FALSE	FALSE
YAL009W	0.874469	-0.765535	0.551015	-0.0995357	0.643856	-0.465664	TRUE	TRUE	TRUE	FALSE	TRUE	TRUE
YAL008W	1.152	2.07039	1.73697	2.16993	2	2.03953	FALSE	FALSE	FALSE	FALSE	FALSE	FALSE
YAL007C	0	-1.16993	-0.584963	0.222392	-0.241008	-0.485427	FALSE	FALSE	FALSE	FALSE	TRUE	FALSE
YAL005C	-1.39917	-0.409604	-0.940129	-0.505594	-0.964155	-0.327281	TRUE	TRUE	TRUE	TRUE	TRUE	TRUE
YAL003W	1.37594	1.55531	1.324	1.38431	1.55063	1.30875	TRUE	TRUE	TRUE	TRUE	TRUE	TRUE
YAL003W	NA	NA	NA	NA	NA	NA	FALSE	FALSE	FALSE	FALSE	FALSE	FALSE
YAL002W	-0.283793	-0.610053	-0.169925	0	0.536053	-0.415037	TRUE	FALSE	FALSE	FALSE	TRUE	TRUE
YAL001C	0	0.137504	1.90689	0.192645	-0.0995357	-0.152003	FALSE	FALSE	FALSE	FALSE	FALSE	FALSE
YAL001C	NA	NA	NA	NA	NA	NA	FALSE	FALSE	FALSE	FALSE	FALSE	FALSE
YAR002W	2.03562	1.71621	1.39232	1.11548	2.02385	2.58496	FALSE	FALSE	FALSE	FALSE	FALSE	FALSE
YAR002C-A	0.222392	-0.415037	0.874469	2	0.152003	0.321928	FALSE	FALSE	FALSE	FALSE	FALSE	FALSE
YAR003W	1.73697	2.16993	3.16993	4.16993	3.05889	4.64386	FALSE	FALSE	FALSE	FALSE	FALSE	FALSE
YAR007C	-0.678072	0.169925	0.710493	1.58496	-0.63743	-1.73697	FALSE	FALSE	FALSE	FALSE	FALSE	FALSE
YAR008W	-0.584963	-2	-0.584963	0	-0.736966	-2.16993	FALSE	FALSE	FALSE	FALSE	FALSE	FALSE
YAR014C	0.95818	1.03562	1.26303	0.308122	1.03847	1.1964	TRUE	TRUE	TRUE	TRUE	TRUE	TRUE
YAR015W	-1.09686	-0.754888	-1.03562	-1.22239	-1.03953	-1.71049	TRUE	FALSE	TRUE	FALSE	TRUE	FALSE
YAR018C	-2.80735	-0.263034	-0.0931094	-1	0.192645	-0.807355	FALSE	FALSE	FALSE	FALSE	FALSE	FALSE
YAR019C	1	1.87447	2.11548	NA	1.32193	2.58496	FALSE	FALSE	FALSE	FALSE	FALSE	FALSE
YAR020C	0.584963	-1.22239	-0.584963	0.321928	-1	-0.415037	FALSE	FALSE	FALSE	FALSE	FALSE	FALSE
YAR023C	1	NA	1.58496	2	NA	1	FALSE	FALSE	FALSE	FALSE	FALSE	FALSE
YAR027W	1	-0.14439	0.943416	0	-0.436099	1.53051	FALSE	FALSE	FALSE	FALSE	FALSE	FALSE
YAR028W	-0.584963	0.584963	2	0.584963	-0.807355	1.58496	FALSE	FALSE	FALSE	FALSE	FALSE	FALSE
YAR029W	1.58496	1.22239	0	0	0.736966	0.321928	FALSE	FALSE	FALSE	FALSE	FALSE	FALSE
YAR031W	NA	NA	NA	NA	NA	NA	FALSE	FALSE	FALSE	FALSE	FALSE	FALSE
YAR033W	1.58496	1.32193	1.16993	0.584963	1	NA	FALSE	FALSE	FALSE	FALSE	FALSE	FALSE
YAR035W	NA	NA	NA	NA	0	1	FALSE	FALSE	FALSE	FALSE	FALSE	FALSE
YAR035C-A	NA	NA	NA	NA	NA	NA	FALSE	FALSE	FALSE	FALSE	FALSE	FALSE
YAR042W	-0.628031	0.758992	1.29278	0.881356	0.707819	0.932886	TRUE	TRUE	TRUE	FALSE	TRUE	TRUE
YAR050W	NA	NA	NA	NA	NA	0	FALSE	FALSE	FALSE	FALSE	FALSE	FALSE
YAR064W	NA	NA	NA	NA	NA	NA	FALSE	FALSE	FALSE	FALSE	FALSE	FALSE
YAR066W	NA	NA	NA	NA	NA	NA	FALSE	FALSE	FALSE	FALSE	FALSE	FALSE
YAR068W	NA	NA	-1	NA	NA	2.58496	FALSE	FALSE	FALSE	FALSE	FALSE	FALSE
YAR071W	-2	NA	NA	-1.58496	NA	NA	FALSE	FALSE	FALSE	FALSE	FALSE	FALSE
YBL113C	0.0721498	1.12029	0.454566	1.1375	0.661198	0.0588937	TRUE	TRUE	TRUE	FALSE	TRUE	TRUE
YBL112C	-4.32193	NA	NA	NA	-3.41504	-3.58496	FALSE	FALSE	FALSE	FALSE	FALSE	FALSE
YBL111C	-4.24793	NA	-3.64386	-3.32193	-3.64386	NA	FALSE	FALSE	FALSE	FALSE	FALSE	FALSE
YBL111C	NA	NA	NA	NA	NA	NA	FALSE	FALSE	FALSE	FALSE	FALSE	FALSE
YBL108C-A	NA	NA	NA	NA	NA	NA	FALSE	FALSE	FALSE	FALSE	FALSE	FALSE
YBL107C	-4.24793	-2.80735	-2.80735	NA	-2.58496	-3.45943	FALSE	FALSE	FALSE	FALSE	FALSE	FALSE
YBL106C	-1.32193	NA	-1	NA	1	NA	FALSE	FALSE	FALSE	FALSE	FALSE	FALSE
YBL105C	-0.0824622	0.691878	0.115477	2.73697	-0.371969	0.341037	FALSE	FALSE	FALSE	FALSE	FALSE	FALSE
YBL104C	-0.736966	-1	1.32193	-1.58496	0	-1.58496	FALSE	FALSE	FALSE	FALSE	FALSE	FALSE
YBL103C	-0.536053	-0.724366	-0.616671	0.758992	-0.157541	0.405992	TRUE	TRUE	TRUE	FALSE	TRUE	TRUE
YBL102W	0.321928	0.447459	-0.530515	0.415037	0.710493	0.710493	FALSE	FALSE	FALSE	FALSE	FALSE	FALSE
YBL101C	1.49185	-0.510195	0.402098	0.14439	0.678072	0.314109	FALSE	TRUE	TRUE	FALSE	TRUE	TRUE
YBL100W-C	NA	NA	NA	NA	NA	NA	FALSE	FALSE	FALSE	FALSE	FALSE	FALSE
YBL099W	2.2854	1.61891	1.86673	1.51937	1.52607	0.736966	FALSE	FALSE	FALSE	FALSE	TRUE	TRUE
YBL098W	1	-0.736966	0.321928	1	0.263034	0	FALSE	FALSE	FALSE	FALSE	FALSE	FALSE
YBL097W	-1.32193	1.58496	1.22239	1	-1.32193	NA	FALSE	FALSE	FALSE	FALSE	FALSE	FALSE
YBL095W	0.584963	1.80735	1.1375	1.58496	0.241008	1.48543	FALSE	FALSE	FALSE	FALSE	FALSE	FALSE
YBL093C	0.925999	0.893085	1.35669	1.04182	1.72935	0.584963	TRUE	FALSE	TRUE	FALSE	TRUE	TRUE
YBL092W	-8.40514	NA	-9.21675	NA	NA	NA	FALSE	FALSE	FALSE	FALSE	FALSE	FALSE
YBL091C-A	-1.77761	-3.9386	-2.70044	-4.05889	-2.65208	-3.848	FALSE	FALSE	FALSE	FALSE	FALSE	FALSE
YBL091C-A	NA	NA	NA	NA	NA	NA	FALSE	FALSE	FALSE	FALSE	FALSE	FALSE
YBL091C	-1.02554	-0.632268	-0.70044	-0.395929	-0.172837	-0.660514	TRUE	TRUE	TRUE	FALSE	TRUE	TRUE
YBL090W	-0.485427	0.241008	0.415037	-0.137504	0.767827	-0.432959	FALSE	FALSE	TRUE	FALSE	TRUE	TRUE
YBL089W	1.26303	1.078	2.5025	0.678072	0.736966	1.36257	FALSE	FALSE	FALSE	FALSE	FALSE	FALSE
YBL088C	-0.485427	-0.736966	2.22239	0.736966	0.263034	0.847997	FALSE	FALSE	FALSE	FALSE	FALSE	FALSE
YBL087C	-2.41923	-2.98868	-2.04519	-1.44931	-2.16711	-2.52356	TRUE	FALSE	TRUE	TRUE	TRUE	TRUE
YBL087C	NA	NA	NA	NA	NA	NA	FALSE	FALSE	FALSE	FALSE	FALSE	FALSE
YBL086C	-3	-1.53051	-0.807355	-2.20163	-3.32193	-0.0671142	FALSE	FALSE	FALSE	FALSE	FALSE	TRUE
YBL085W	-1.04731	-1.52356	-0.332575	-0.793549	-1.51096	-1.078	TRUE	FALSE	TRUE	FALSE	TRUE	FALSE
YBL084C	-1.22239	-1.16993	-1.41504	0	-0.584963	1.22239	FALSE	FALSE	FALSE	FALSE	FALSE	FALSE
YBL082C	1.93074	1.42884	3.04836	2.62449	3.20945	3.88753	FALSE	FALSE	FALSE	FALSE	FALSE	FALSE
YBL081W	-1.52725	-1.37851	-1.08406	-2.08746	-1.5656	-1.63743	TRUE	FALSE	TRUE	FALSE	TRUE	FALSE
YBL080C	2.58496	1.32193	2.32193	3	2.45943	1.37851	FALSE	FALSE	FALSE	FALSE	FALSE	FALSE
YBL079W	0.839535	1.15754	1.4021	0.652077	0.847997	-0.152003	FALSE	FALSE	FALSE	FALSE	TRUE	FALSE
YBL078C	-0.719892	-0.862496	-0.843881	-0.860597	-0.448358	-0.800159	TRUE	TRUE	TRUE	TRUE	TRUE	TRUE
YBL076C	-0.225881	0.36257	-0.0163018	0.111031	-0.188445	-0.275634	TRUE	TRUE	TRUE	TRUE	TRUE	TRUE
YBL075C	-0.347923	-2.09954	-0.469485	-1.66297	0	-0.736966	FALSE	FALSE	FALSE	FALSE	FALSE	FALSE
YBL074C	0	-0.584963	0.263034	0	-0.736966	-0.263034	FALSE	FALSE	FALSE	FALSE	FALSE	FALSE
YBL072C	-3.96963	-4.69116	-4.63495	-4.47573	-5.0836	-4.77259	FALSE	FALSE	FALSE	FALSE	FALSE	FALSE
YBL071C-B	0	NA	0	NA	-2	0	FALSE	FALSE	FALSE	FALSE	FALSE	FALSE
YBL071W-A	-0.14439	-0.616671	0.333424	-0.106915	0.767992	-0.222392	TRUE	TRUE	TRUE	TRUE	TRUE	TRUE
YBL069W	-1.90689	0.321928	-1	0.321928	-1.078	0.415037	FALSE	FALSE	FALSE	FALSE	FALSE	FALSE
YBL068W	-0.736966	-1.80735	0	-1.80735	-0.321928	-1.26303	FALSE	FALSE	TRUE	FALSE	TRUE	FALSE
YBL067C	-0.724366	0.765535	-0.947533	-0.736966	-1.16993	0.222392	TRUE	FALSE	FALSE	FALSE	FALSE	FALSE
YBL066C	-1.848	-1.48543	-1	-2.32193	-0.263034	-0.469485	FALSE	FALSE	FALSE	FALSE	FALSE	FALSE
YBL064C	-1.09954	-1.80735	-0.847997	-1.09311	-1	-1.71882	FALSE	FALSE	FALSE	FALSE	FALSE	TRUE
YBL063W	-0.530515	-0.584963	0.584963	1.58496	0.552541	-0.906891	FALSE	FALSE	FALSE	FALSE	FALSE	FALSE
YBL061C	-0.628031	0.152003	0.536053	-0.678072	0.0995357	-1.41504	TRUE	FALSE	TRUE	FALSE	TRUE	FALSE
YBL060W	1.08746	1.5025	1.16993	1.45943	0.691878	0.70044	FALSE	FALSE	FALSE	FALSE	FALSE	FALSE
YBL059C-A	0.847997	0.0740006	0.628031	1	1.55639	1.27302	FALSE	FALSE	TRUE	FALSE	FALSE	FALSE
YBL059C-A	NA	NA	NA	NA	NA	NA	FALSE	FALSE	FALSE	FALSE	FALSE	FALSE
YBL059W	-3.32193	-2.80735	NA	NA	NA	NA	FALSE	FALSE	FALSE	FALSE	FALSE	FALSE
YBL059W	NA	NA	NA	NA	NA	NA	FALSE	FALSE	FALSE	FALSE	FALSE	FALSE
YBL058W	0.263034	-0.125531	1.39232	0.584963	0.520832	0.296982	TRUE	TRUE	FALSE	FALSE	TRUE	TRUE
YBL057C	-1.53605	-0.459432	-0.234465	0.192645	-0.813587	-0.710493	FALSE	FALSE	TRUE	FALSE	TRUE	TRUE
YBL056W	1.70044	0.716207	2.16993	2.11548	2.5025	1.53051	FALSE	FALSE	FALSE	FALSE	FALSE	FALSE
YBL055C	-3.41504	-2.58496	-1.51457	-1.58496	-2.09954	-1.58496	FALSE	FALSE	FALSE	FALSE	FALSE	FALSE
YBL054W	0.716207	NA	0	0	0.137504	-0.415037	FALSE	FALSE	FALSE	FALSE	TRUE	FALSE
YBL052C	-1.06413	-0.485427	-2.37851	0	-0.125531	-0.678072	FALSE	FALSE	FALSE	FALSE	FALSE	FALSE
YBL051C	-0.525091	-0.662965	-0.287282	-1.14296	-0.308122	-0.688056	TRUE	TRUE	TRUE	TRUE	TRUE	TRUE
YBL050W	-1	-1.47805	-1.65208	-1.52356	-1.37851	-1.34395	FALSE	FALSE	FALSE	FALSE	FALSE	FALSE
YBL050W	NA	NA	NA	NA	NA	NA	FALSE	FALSE	FALSE	FALSE	FALSE	FALSE
YBL049W	-1.32193	1.73697	2	1.45943	0.584963	3.08746	FALSE	FALSE	FALSE	FALSE	FALSE	FALSE
YBL047C	-1.54432	-1.20645	-1.80735	-1.37851	-1.42626	-0.216811	FALSE	FALSE	FALSE	FALSE	FALSE	TRUE
YBL046W	-3.32193	-1.73697	-1	0	-1.58496	-2	FALSE	FALSE	FALSE	FALSE	FALSE	FALSE
YBL045C	1.06711	1.01217	1.08314	0.527629	1.26793	0.838249	TRUE	TRUE	TRUE	TRUE	TRUE	TRUE
YBL044W	NA	NA	NA	NA	NA	NA	FALSE	FALSE	FALSE	FALSE	FALSE	FALSE
YBL043W	-1.41504	-1.58496	-1	-1.58496	-2	-1	FALSE	FALSE	FALSE	FALSE	FALSE	FALSE
YBL042C	0.14439	1.28011	2.27302	0	0.163499	0.192645	FALSE	FALSE	FALSE	FALSE	TRUE	FALSE
YBL041W	-0.374396	-0.59048	-0.305249	-0.230613	-0.191141	-0.634351	TRUE	TRUE	TRUE	TRUE	TRUE	TRUE
YBL040C	0.667425	0.695145	1.22239	2	2.44931	0.902703	FALSE	TRUE	TRUE	FALSE	FALSE	TRUE
YBL040C	NA	NA	NA	NA	NA	NA	FALSE	FALSE	FALSE	FALSE	FALSE	FALSE
YBL039W-B	0	-1	-2.32193	-0.584963	-0.415037	0	FALSE	FALSE	FALSE	FALSE	FALSE	FALSE
YBL039C	1.54889	3.16993	1.51457	1.90689	1.80735	1.078	TRUE	FALSE	TRUE	FALSE	FALSE	FALSE
YBL038W	-0.452512	-0.103093	-0.449803	-0.530515	-0.145851	-1.08489	FALSE	TRUE	TRUE	TRUE	TRUE	TRUE
YBL037W	-1.66297	-1.58496	-0.765535	-1	-1.06413	-1.67807	FALSE	FALSE	FALSE	FALSE	FALSE	FALSE
YBL036C	-2.75002	-2.62449	-0.974005	-1.66297	-1.12399	-2.23266	FALSE	FALSE	TRUE	FALSE	TRUE	FALSE
YBL035C	-0.807355	0	-1.22239	-2	-0.137504	0	FALSE	FALSE	FALSE	FALSE	FALSE	FALSE
YBL034C	0.321928	-2	-3.32193	0.584963	-1.41504	-1.73697	FALSE	FALSE	FALSE	FALSE	FALSE	FALSE
YBL033C	-1.46949	-0.523562	-0.823122	0.321928	-0.70044	-1.18057	FALSE	FALSE	TRUE	TRUE	TRUE	FALSE
YBL032W	-0.370368	-0.544321	-0.190822	0.485427	-0.0641303	-0.23349	TRUE	TRUE	TRUE	TRUE	TRUE	TRUE
YBL031W	-1.07039	1	-0.788496	-0.584963	-0.938599	-0.530515	FALSE	FALSE	FALSE	FALSE	FALSE	FALSE
YBL030C	-0.507604	0.380031	-0.157952	-0.0943274	-0.418404	0.12755	TRUE	TRUE	TRUE	TRUE	TRUE	TRUE
YBL029C-A	1.88753	1.32193	2.70044	1.91886	1.27462	1.79141	FALSE	TRUE	FALSE	TRUE	TRUE	TRUE
YBL029W	-0.584963	0	0	NA	NA	NA	FALSE	FALSE	FALSE	FALSE	FALSE	FALSE
YBL028C	0.0687128	-1.73697	0.415037	1.5025	0.229482	-0.169925	TRUE	FALSE	TRUE	FALSE	TRUE	TRUE
YBL027W	-0.376474	-0.36257	0.184622	0.0630098	0.00421225	0.142253	TRUE	TRUE	TRUE	TRUE	TRUE	TRUE
YBL027W	NA	NA	NA	NA	NA	NA	FALSE	FALSE	FALSE	FALSE	FALSE	FALSE
YBL026W	-1.11548	-1	-0.321928	0.125531	-0.463947	-0.607683	FALSE	FALSE	TRUE	FALSE	TRUE	TRUE
YBL026W	NA	NA	NA	NA	NA	NA	FALSE	FALSE	FALSE	FALSE	FALSE	FALSE
YBL025W	-1.22239	-0.263034	0.736966	1.80735	0.192645	-0.777608	FALSE	FALSE	FALSE	FALSE	FALSE	FALSE
YBL024W	0.254183	-0.932886	0.110644	-1	-0.0799235	-1	TRUE	TRUE	TRUE	FALSE	TRUE	TRUE
YBL023C	-1.1375	0.152003	0.125531	-1.58496	-0.921997	-0.0824622	FALSE	FALSE	TRUE	FALSE	FALSE	FALSE
YBL022C	-0.847997	-0.584963	-0.29956	-0.616671	-1.19265	0.125531	TRUE	FALSE	TRUE	FALSE	TRUE	TRUE
YBL021C	1.60881	1.53605	1.53605	2.80735	2.08342	2.2854	TRUE	FALSE	TRUE	FALSE	TRUE	FALSE
YBL020W	-0.415037	-0.263034	-0.273018	0.70044	0.304855	-0.777608	TRUE	FALSE	TRUE	FALSE	TRUE	FALSE
YBL019W	-3	-0.415037	-1	0	-1	-2	FALSE	FALSE	FALSE	FALSE	FALSE	FALSE
YBL018C	1.04731	0.807355	1.58496	0.847997	1.61471	0.807355	FALSE	FALSE	FALSE	FALSE	FALSE	FALSE
YBL018C	NA	NA	NA	NA	NA	NA	FALSE	FALSE	FALSE	FALSE	FALSE	FALSE
YBL017C	-0.0544478	-0.341037	0.584963	-0.180572	0.403356	-0.36257	TRUE	FALSE	TRUE	FALSE	TRUE	TRUE
YBL016W	1.14505	0.152003	1.97491	1.16993	2.24236	0.978626	TRUE	TRUE	TRUE	TRUE	TRUE	TRUE
YBL015W	-2.14296	-2.26303	-2.29546	-3.11548	-2.44057	-1.87447	FALSE	FALSE	FALSE	FALSE	FALSE	FALSE
YBL014C	0.963474	1.53051	1.67807	-0.415037	1.34395	1	TRUE	FALSE	FALSE	FALSE	TRUE	FALSE
YBL013W	2.32193	4	2.32193	1	2.16993	3.08746	FALSE	FALSE	FALSE	FALSE	FALSE	FALSE
YBL011W	0.485427	0.0489096	0.652077	0.628031	0.954196	0.283793	FALSE	TRUE	FALSE	FALSE	FALSE	TRUE
YBL010C	-0.222392	0.485427	0.721284	-0.485427	0.921997	0	FALSE	FALSE	TRUE	FALSE	TRUE	FALSE
YBL009W	-0.263034	1.58496	1.06413	1.58496	-0.106915	1.32193	FALSE	FALSE	FALSE	FALSE	FALSE	FALSE
YBL008W-A	NA	NA	NA	NA	NA	NA	FALSE	FALSE	FALSE	FALSE	FALSE	FALSE
YBL008W	1.58496	1.58496	0	0	1.32193	1.41504	FALSE	FALSE	FALSE	FALSE	FALSE	FALSE
YBL007C	2.91648	2.9386	3.06178	2.82312	2.96123	3.19162	TRUE	FALSE	TRUE	FALSE	TRUE	TRUE
YBL006C	1.25376	0.684498	1.15587	0.93546	1.5645	1.20872	TRUE	TRUE	TRUE	TRUE	TRUE	TRUE
YBL005W	-0.584963	-0.415037	1	0.485427	-0.847997	0.263034	FALSE	FALSE	FALSE	FALSE	FALSE	FALSE
YBL004W	-1.42626	-1.32193	-0.836501	-3.16993	-1.53051	-1.48543	FALSE	FALSE	FALSE	FALSE	FALSE	FALSE
YBL003C	0.470381	0.5807	0.775718	0.616671	0.960651	0.375145	TRUE	TRUE	TRUE	TRUE	TRUE	TRUE
YBL002W	-0.760375	-1.08866	-0.487715	-1.10806	-0.747961	-1.00405	TRUE	TRUE	TRUE	TRUE	TRUE	TRUE
YBL001C	-1.16046	-1.1822	-0.230298	0.584963	-0.249359	-0.852443	TRUE	TRUE	TRUE	TRUE	TRUE	TRUE
YBR001C	1.27302	0.765535	1.62449	0.923379	0.750022	0.20482	FALSE	TRUE	FALSE	TRUE	TRUE	TRUE
YBR002C	1.32193	2.08746	2.68072	2.63227	3.04731	1.69188	TRUE	FALSE	FALSE	FALSE	FALSE	FALSE
YBR003W	-0.459432	2.11548	0.263034	-0.263034	0.552541	1.1375	FALSE	FALSE	FALSE	FALSE	FALSE	FALSE
YBR004C	0.584963	1.58496	-3.16993	0	-3	-3.16993	FALSE	FALSE	FALSE	FALSE	FALSE	FALSE
YBR005W	-2.19878	-1.03953	-0.857981	-0.736966	-1.026	-1.078	TRUE	FALSE	TRUE	FALSE	TRUE	FALSE
YBR006W	1.80735	0.137504	1.19265	1	1.22239	-0.893085	FALSE	FALSE	FALSE	FALSE	FALSE	FALSE
YBR007C	-2.58496	-3.70044	-2.05889	-3.58496	-1.66297	-4.64386	FALSE	FALSE	FALSE	FALSE	FALSE	FALSE
YBR008C	-0.932886	0.321928	0.628031	-0.678072	0.906891	0.125531	FALSE	FALSE	FALSE	FALSE	FALSE	FALSE
YBR009C	-0.0775491	-0.5115	0.272936	0.159576	0.150085	-0.148576	TRUE	TRUE	TRUE	TRUE	TRUE	TRUE
YBR010W	-0.00351448	-0.194879	-0.0365259	0.296393	0.177362	-0.230554	TRUE	TRUE	TRUE	TRUE	TRUE	TRUE
YBR011C	-0.376721	-0.726239	-0.0409303	-0.55849	-0.121562	-0.5025	TRUE	TRUE	TRUE	TRUE	TRUE	TRUE
YBR013C	NA	-0.415037	NA	2	NA	0.263034	FALSE	FALSE	FALSE	FALSE	FALSE	FALSE
YBR014C	0.341037	-0.688056	0.443607	-0.263034	0.321928	-0.932886	FALSE	FALSE	TRUE	TRUE	TRUE	TRUE
YBR015C	-0.0995357	-1.80735	-0.289507	-0.874469	0	-0.137504	FALSE	FALSE	FALSE	FALSE	FALSE	FALSE
YBR016W	0.220075	0.341037	1.281	0.815575	1.20786	0.776059	TRUE	TRUE	TRUE	TRUE	TRUE	TRUE
YBR017C	0.480626	1.80735	0.584963	0.469485	0.540568	0.847997	TRUE	FALSE	TRUE	FALSE	TRUE	TRUE
YBR018C	NA	1.58496	NA	NA	0	0	FALSE	FALSE	FALSE	FALSE	FALSE	FALSE
YBR019C	NA	NA	NA	NA	NA	NA	FALSE	FALSE	FALSE	FALSE	FALSE	FALSE
YBR020W	NA	NA	NA	NA	1	NA	FALSE	FALSE	FALSE	FALSE	FALSE	FALSE
YBR021W	0	2.80735	2	2	NA	NA	FALSE	FALSE	FALSE	FALSE	FALSE	FALSE
YBR022W	0	-1.58496	1.58496	0.584963	1.32193	-0.485427	FALSE	FALSE	FALSE	FALSE	FALSE	FALSE
YBR023C	-1.152	-0.584963	0.321928	0	-0.378512	-1.73697	FALSE	FALSE	FALSE	FALSE	FALSE	FALSE
YBR024W	0	0	0	0.125531	0.447459	1.48543	FALSE	FALSE	FALSE	FALSE	FALSE	FALSE
YBR025C	-0.63005	-1.29768	-0.4975	0.459432	0.0506261	-1.65208	TRUE	TRUE	TRUE	FALSE	TRUE	TRUE
YBR026C	0.459432	0	-2.24793	0	-0.222392	-0.662965	FALSE	FALSE	FALSE	FALSE	FALSE	FALSE
YBR028C	0.160465	-1	0.0931094	0.321928	0.830075	2.80735	FALSE	FALSE	FALSE	FALSE	FALSE	FALSE
YBR029C	-0.289507	-0.807355	-0.823122	-0.263034	0.0671142	-1.41504	FALSE	FALSE	FALSE	FALSE	TRUE	FALSE
YBR030W	-0.222392	1.58496	0.415037	0	-0.584963	NA	FALSE	FALSE	FALSE	FALSE	FALSE	FALSE
YBR031W	0.290156	0.488101	0.664397	0.750022	1.00346	0.876729	TRUE	TRUE	TRUE	TRUE	TRUE	TRUE
YBR033W	NA	NA	NA	NA	NA	NA	FALSE	FALSE	FALSE	FALSE	FALSE	FALSE
YBR034C	-0.427421	-0.584963	-1.38466	0.584963	-1.03747	-1.16993	TRUE	FALSE	FALSE	FALSE	FALSE	FALSE
YBR035C	-0.148099	-1.50696	0.207805	-0.961526	0.128324	-0.856636	TRUE	FALSE	TRUE	FALSE	TRUE	TRUE
YBR036C	5.85798	3.32193	3.68072	2.95777	3.62644	2.89947	FALSE	FALSE	FALSE	FALSE	TRUE	FALSE
YBR037C	3.08746	3.52356	1.93289	1.926	2.54432	1.28011	FALSE	FALSE	FALSE	FALSE	FALSE	FALSE
YBR038W	1.58496	1.52356	2.63227	2.32193	3.90689	0.192645	FALSE	FALSE	FALSE	FALSE	FALSE	FALSE
YBR039W	-0.343954	-0.621488	-0.736966	1.05889	-0.140863	0.552541	TRUE	FALSE	TRUE	FALSE	TRUE	TRUE
YBR040W	NA	NA	NA	NA	NA	NA	FALSE	FALSE	FALSE	FALSE	FALSE	FALSE
YBR041W	0	1	1.41504	3.16993	1.26303	0.678072	FALSE	FALSE	FALSE	FALSE	FALSE	FALSE
YBR042C	0.206451	0.893085	1.32193	2.80735	2	1	FALSE	FALSE	FALSE	FALSE	FALSE	FALSE
YBR043C	1.04731	0.447459	0.862496	0.584963	0	0.192645	FALSE	FALSE	FALSE	FALSE	TRUE	FALSE
YBR044C	1.48543	2.32193	0.514573	1.32193	1.152	0.263034	FALSE	FALSE	FALSE	FALSE	FALSE	FALSE
YBR045C	0	0.115477	NA	0	1	0	FALSE	FALSE	FALSE	FALSE	FALSE	FALSE
YBR046C	-1.24793	-1.15528	-1.36257	-1.30812	-0.910733	-1.16993	FALSE	TRUE	TRUE	TRUE	TRUE	TRUE
YBR047W	NA	-2.32193	-1.58496	0.584963	-0.415037	0.678072	FALSE	FALSE	FALSE	FALSE	FALSE	FALSE
YBR048W	-0.185323	0.191678	0.266939	1.06767	0.477003	0.985427	TRUE	TRUE	TRUE	TRUE	TRUE	TRUE
YBR048W	NA	NA	NA	NA	NA	NA	FALSE	FALSE	FALSE	FALSE	FALSE	FALSE
YBR049C	-1.58496	-1	0.275634	-0.710493	-0.199309	-0.857981	FALSE	FALSE	FALSE	FALSE	TRUE	FALSE
YBR050C	0	0.584963	NA	NA	NA	0	FALSE	FALSE	FALSE	FALSE	FALSE	FALSE
YBR052C	0.156119	-0.314873	1.03953	0.31034	1.38247	0.40632	TRUE	TRUE	TRUE	TRUE	TRUE	TRUE
YBR053C	-1.70044	-3.16993	-3.24793	-2.64386	-1.70044	-3.8679	FALSE	FALSE	FALSE	FALSE	FALSE	FALSE
YBR054W	-0.556393	-0.743225	-0.584963	-0.0565835	-0.157541	-0.657112	TRUE	TRUE	FALSE	TRUE	TRUE	TRUE
YBR055C	-1.53051	-1.45943	0.289507	-0.321928	-0.556393	-0.584963	FALSE	FALSE	FALSE	FALSE	FALSE	FALSE
YBR056W	-0.0780025	-0.478047	-0.563901	-0.0671142	0.160465	-0.106915	FALSE	TRUE	TRUE	TRUE	TRUE	TRUE
YBR057C	-0.879706	-1.80735	-1.33258	-2.45943	-1.29956	-1.15754	TRUE	FALSE	TRUE	FALSE	TRUE	TRUE
YBR058C	0.765535	-1	0.777608	-1	1.76553	0.485427	FALSE	FALSE	FALSE	FALSE	FALSE	FALSE
YBR058C-A	0.559427	0.744743	0.75336	0.31034	0.945552	0.594361	TRUE	TRUE	TRUE	TRUE	TRUE	TRUE
YBR059C	-0.321928	-1.58496	-0.321928	-1.53051	-0.917538	-1.04731	TRUE	FALSE	TRUE	FALSE	FALSE	FALSE
YBR060C	-1.43296	-1.66297	-0.847997	-0.263034	-1.46949	-0.621488	FALSE	FALSE	FALSE	FALSE	FALSE	FALSE
YBR061C	-0.807355	-0.169925	-1.31366	-1.67807	-1.10692	-1.30256	TRUE	FALSE	TRUE	FALSE	TRUE	FALSE
YBR062C	-3.08746	-3.11548	-5.32193	-1.67807	-3.9386	-3.58496	FALSE	FALSE	FALSE	FALSE	FALSE	FALSE
YBR062C	NA	NA	NA	NA	NA	NA	FALSE	FALSE	FALSE	FALSE	FALSE	FALSE
YBR063C	0.192645	-0.874469	3	-0.514573	-0.584963	-0.263034	FALSE	FALSE	FALSE	FALSE	FALSE	FALSE
YBR065C	0.392317	0.0931094	1	0.152003	0.710493	0.0995357	FALSE	FALSE	FALSE	FALSE	FALSE	FALSE
YBR066C	-0.258734	0.184425	0.230298	0.400538	0.526069	0.744743	TRUE	TRUE	TRUE	TRUE	TRUE	TRUE
YBR067C	-1.2578	-1.12199	0.0703893	-0.736966	-0.263034	-0.605721	TRUE	FALSE	TRUE	FALSE	TRUE	TRUE
YBR068C	-0.584963	0.169925	0.662965	1.1964	0.408806	1	TRUE	TRUE	TRUE	TRUE	TRUE	TRUE
YBR069C	-0.378512	0.0740006	-0.321928	-1	-0.654865	-0.289507	TRUE	FALSE	TRUE	FALSE	TRUE	TRUE
YBR070C	0.830075	0.447459	1.07039	1.73697	1.25376	0.321928	FALSE	FALSE	TRUE	FALSE	TRUE	FALSE
YBR071W	-0.472068	0.678072	-0.314109	-0.584963	-0.36257	-0.415037	TRUE	FALSE	TRUE	FALSE	TRUE	FALSE
YBR072W	-0.120294	-0.40439	-0.0317089	-0.59136	-0.0303736	-0.207233	TRUE	TRUE	TRUE	TRUE	TRUE	TRUE
YBR072C-A	NA	NA	NA	NA	NA	NA	FALSE	FALSE	FALSE	FALSE	FALSE	FALSE
YBR073W	NA	-4.52356	-3.56478	-4.45943	-4.59694	-4	FALSE	FALSE	FALSE	FALSE	FALSE	FALSE
YBR074W	-3.64386	-3.16993	-3.32193	NA	-3.58496	NA	FALSE	FALSE	FALSE	FALSE	FALSE	FALSE
YBR076W	NA	NA	NA	0	NA	NA	FALSE	FALSE	FALSE	FALSE	FALSE	FALSE
YBR077C	-1	1	1	-0.321928	2	1.80735	FALSE	FALSE	FALSE	FALSE	FALSE	FALSE
YBR078W	-0.863498	-0.142958	-0.4667	-0.491853	-0.401473	0	TRUE	TRUE	TRUE	TRUE	TRUE	TRUE
YBR078W	NA	NA	NA	NA	NA	NA	FALSE	FALSE	FALSE	FALSE	FALSE	FALSE
YBR079C	0.704544	0.874469	1.35364	0	2.09311	1.12553	TRUE	FALSE	FALSE	FALSE	FALSE	FALSE
YBR080C	1.0614	1.12199	0.725825	-0.514573	0.639824	-0.245112	TRUE	FALSE	TRUE	FALSE	TRUE	TRUE
YBR081C	-2.32193	-2.80735	-1.94753	-3.11548	-2.58496	-1.5025	FALSE	FALSE	FALSE	FALSE	FALSE	FALSE
YBR082C	-1.02934	-1.05033	-0.868853	-0.661584	-0.76722	-0.93049	TRUE	TRUE	TRUE	TRUE	TRUE	TRUE
YBR082C	NA	NA	NA	NA	NA	NA	FALSE	FALSE	FALSE	FALSE	FALSE	FALSE
YBR083W	0.777608	-1	0.947533	-0.459432	-0.857981	-0.180572	FALSE	FALSE	FALSE	FALSE	FALSE	FALSE
YBR084W	-0.756729	-0.662965	-0.440573	-2	-1.19265	-0.616671	TRUE	FALSE	TRUE	FALSE	TRUE	FALSE
YBR084C-A	0.190778	0.0618393	0.644563	0.0747678	0.645415	0.178146	TRUE	TRUE	TRUE	TRUE	TRUE	TRUE
YBR084C-A	NA	NA	NA	NA	NA	NA	FALSE	FALSE	FALSE	FALSE	FALSE	FALSE
YBR085W	NA	NA	NA	NA	NA	NA	FALSE	FALSE	FALSE	FALSE	FALSE	FALSE
YBR085C-A	0	-0.533824	0.736966	-0.337035	0.350186	-0.831877	TRUE	TRUE	TRUE	TRUE	TRUE	TRUE
YBR086C	-1.19794	-1.09516	-1.16046	-0.900464	-1.08246	-1.67807	FALSE	TRUE	FALSE	FALSE	FALSE	FALSE
YBR087W	NA	NA	NA	1	-3	-2.80735	FALSE	FALSE	FALSE	FALSE	FALSE	FALSE
YBR088C	1.34395	1.7885	1.14136	0.954196	1.22948	1.0199	TRUE	FALSE	TRUE	FALSE	TRUE	TRUE
YBR089C-A	-1.73697	-1.71621	-2.16993	-1.58496	-1.65208	-0.912537	FALSE	FALSE	FALSE	FALSE	FALSE	FALSE
YBR090C	-4.52356	NA	-4.9542	NA	-4.42626	NA	FALSE	FALSE	FALSE	FALSE	FALSE	FALSE
YBR090C	NA	NA	NA	NA	NA	NA	FALSE	FALSE	FALSE	FALSE	FALSE	FALSE
YBR091C	1.42223	1.41504	1.46855	1.61891	2.25054	2.03562	TRUE	FALSE	TRUE	FALSE	TRUE	TRUE
YBR092C	1.11548	-0.289507	0.643856	2	1.14684	1	FALSE	FALSE	TRUE	FALSE	TRUE	FALSE
YBR093C	NA	0	NA	-0.584963	NA	0	FALSE	FALSE	FALSE	FALSE	FALSE	FALSE
YBR094W	-0.584963	-1	1.32193	-0.415037	-0.584963	NA	FALSE	FALSE	FALSE	FALSE	FALSE	FALSE
YBR095C	-0.628031	-0.415037	0.819428	1.32193	0.847997	0.5025	FALSE	FALSE	FALSE	FALSE	TRUE	FALSE
YBR096W	-2.16993	-2.16993	-2.16993	NA	-1.1375	NA	FALSE	FALSE	FALSE	FALSE	FALSE	FALSE
YBR097W	2.11548	1.16993	3.90689	0.321928	2.11548	1.16993	FALSE	FALSE	FALSE	FALSE	FALSE	FALSE
YBR098W	-0.152003	0.169925	1.66297	2.32193	0.893085	0.584963	FALSE	FALSE	FALSE	FALSE	FALSE	FALSE
YBR101C	1.35364	-0.241008	0.584963	0.378512	0.807355	0.823122	FALSE	FALSE	TRUE	FALSE	TRUE	FALSE
YBR102C	-0.93587	0.234465	-0.29956	-0.906891	-0.509014	-0.415037	TRUE	FALSE	TRUE	FALSE	TRUE	FALSE
YBR103W	-0.378512	0.485427	-1	-1.32193	-2.16993	-0.807355	FALSE	FALSE	FALSE	FALSE	FALSE	FALSE
YBR104W	0.459432	2	2.16993	0	1.1375	NA	FALSE	FALSE	FALSE	FALSE	FALSE	FALSE
YBR105C	0.924449	0.692571	1.58496	1.03653	1.70246	1.09039	TRUE	TRUE	TRUE	TRUE	TRUE	TRUE
YBR106W	2.87027	2.67499	3.38054	3.71989	3.14048	3.17897	TRUE	TRUE	TRUE	FALSE	TRUE	TRUE
YBR107C	-0.321928	1.58496	-0.415037	NA	3	0.415037	FALSE	FALSE	FALSE	FALSE	FALSE	FALSE
YBR108W	1.2854	0.106915	-0.36257	0.201634	0.430634	0.476438	FALSE	TRUE	TRUE	TRUE	TRUE	TRUE
YBR109C	0.852443	1.02975	1.30117	1.40439	1.59637	1.86994	TRUE	TRUE	TRUE	FALSE	TRUE	TRUE
YBR110W	0.906891	0.584963	2.45943	0.321928	1.07039	0.222392	FALSE	FALSE	FALSE	FALSE	FALSE	FALSE
YBR111C	-5.93074	-3.87447	-3.61891	-5.32193	-3.05445	-3.12102	FALSE	FALSE	FALSE	FALSE	FALSE	FALSE
YBR111W-A	-4.36923	-3.29462	-2.41504	-3.54432	-2.19265	-2.60768	FALSE	FALSE	FALSE	FALSE	TRUE	TRUE
YBR111W-A	NA	NA	NA	NA	NA	NA	FALSE	FALSE	FALSE	FALSE	FALSE	FALSE
YBR111W-A	NA	NA	NA	NA	NA	NA	FALSE	FALSE	FALSE	FALSE	FALSE	FALSE
YBR112C	0.328623	0.634716	0.199309	0.959358	0.545434	0.710493	TRUE	TRUE	TRUE	FALSE	TRUE	TRUE
YBR114W	-0.473931	-0.784271	0.148099	-0.111031	0.125531	0.0671142	TRUE	TRUE	TRUE	TRUE	TRUE	TRUE
YBR115C	2.19265	2.22239	1.52356	1.87447	1.72247	2.05889	FALSE	FALSE	FALSE	FALSE	FALSE	FALSE
YBR117C	0	0.400538	1	0.584963	0	0.584963	FALSE	TRUE	FALSE	TRUE	FALSE	TRUE
YBR118W	-2.02124	-1.70109	-1.53023	-1.19153	-1.28918	-1.23253	TRUE	TRUE	TRUE	TRUE	TRUE	TRUE
YBR119W	0.160465	-0.187627	0.736966	0.0544478	1.11548	1.25873	TRUE	TRUE	TRUE	TRUE	TRUE	TRUE
YBR119W	NA	NA	NA	NA	NA	NA	FALSE	FALSE	FALSE	FALSE	FALSE	FALSE
YBR120C	-1.44057	-1.58496	-2.07039	-1.1375	-0.736966	-2.39232	FALSE	FALSE	FALSE	FALSE	FALSE	FALSE
YBR121C	-0.590417	-0.97728	-0.465664	-0.153805	-0.711202	-0.808859	TRUE	TRUE	TRUE	TRUE	TRUE	TRUE
YBR122C	0.652077	-0.5025	0.0443941	-0.222392	1.02857	-0.0524674	FALSE	FALSE	TRUE	FALSE	TRUE	TRUE
YBR123C	1.05063	1.09954	0.917538	1.34792	1.03395	0.932886	FALSE	FALSE	FALSE	FALSE	TRUE	TRUE
YBR125C	-0.459432	0.530515	-3.16993	-1.11548	-1	-0.584963	FALSE	FALSE	FALSE	FALSE	FALSE	FALSE
YBR126C	-1.19265	-1.06746	-0.0759489	-1.52893	-0.467126	-0.579782	TRUE	TRUE	TRUE	TRUE	TRUE	TRUE
YBR127C	-0.496426	-0.520832	-0.395929	0.450661	0.0412227	-0.0813001	TRUE	TRUE	TRUE	TRUE	TRUE	TRUE
YBR128C	0.263034	2.32193	1.76553	1.58496	-0.321928	1.48543	FALSE	FALSE	FALSE	FALSE	FALSE	FALSE
YBR129C	-1.05445	-0.830075	1	-0.137504	-0.459432	-0.807355	FALSE	FALSE	FALSE	FALSE	TRUE	FALSE
YBR130C	-0.222392	-0.0703893	0.263034	-0.415037	0.976541	-0.427421	TRUE	TRUE	TRUE	FALSE	TRUE	TRUE
YBR131W	1.73697	0.485427	2.32193	NA	2.32193	0	FALSE	FALSE	FALSE	FALSE	FALSE	FALSE
YBR132C	-1.37851	-0.906891	-1.32193	-1.73697	-0.874469	-0.662965	FALSE	FALSE	FALSE	FALSE	FALSE	FALSE
YBR133C	0.485427	-0.415037	-0.736966	-0.847997	-0.137504	0.222392	FALSE	FALSE	FALSE	FALSE	FALSE	FALSE
YBR135W	-1.56188	-1.58496	-1.85244	-1.73697	-1.38333	-1.88753	TRUE	FALSE	FALSE	FALSE	TRUE	FALSE
YBR136W	2.70044	0.893085	1.1375	1.73697	0.70044	0.736966	FALSE	FALSE	FALSE	FALSE	FALSE	FALSE
YBR137W	-1.24793	-3.05889	-1	-1.51457	-2	-1.58496	FALSE	FALSE	FALSE	FALSE	FALSE	FALSE
YBR138C	-1.48543	-0.874469	-1.22239	0.222392	-0.378512	-1.36257	FALSE	FALSE	FALSE	FALSE	FALSE	FALSE
YBR139W	-2.45943	-4.20945	-2.45943	-2.58496	-4.24793	-2.5502	FALSE	FALSE	FALSE	FALSE	FALSE	FALSE
YBR140C	0.874469	0.415037	-0.169925	-1	0.906891	1.20163	FALSE	FALSE	FALSE	FALSE	FALSE	FALSE
YBR141C	-0.93587	0	-0.929611	0	-0.604071	-1.80735	TRUE	FALSE	TRUE	FALSE	TRUE	FALSE
YBR142W	0.652077	NA	1.848	1	2	1.58496	FALSE	FALSE	FALSE	FALSE	FALSE	FALSE
YBR143C	-0.026967	-0.592825	-0.347923	-0.456378	-0.235378	-1.07923	TRUE	TRUE	TRUE	TRUE	TRUE	TRUE
YBR145W	-2.39232	0	-2	-1.58496	-0.906891	0.263034	FALSE	FALSE	FALSE	FALSE	FALSE	FALSE
YBR146W	1.27302	1.22239	1.28011	1.32193	1.91427	0.938599	FALSE	FALSE	FALSE	FALSE	FALSE	FALSE
YBR147W	1	-0.263034	0.736966	0	0	-0.736966	FALSE	FALSE	FALSE	FALSE	FALSE	FALSE
YBR148W	NA	0	NA	NA	NA	NA	FALSE	FALSE	FALSE	FALSE	FALSE	FALSE
YBR149W	1.32193	1.83289	1.69188	1.09954	1.44057	1.48938	FALSE	FALSE	FALSE	FALSE	TRUE	TRUE
YBR150C	0.796467	1.72935	1.5025	1.58496	1.4245	1.82103	TRUE	TRUE	TRUE	TRUE	TRUE	TRUE
YBR151W	-0.85561	-0.750972	-1.44057	-0.395929	-0.415037	-1	TRUE	TRUE	FALSE	FALSE	TRUE	TRUE
YBR152W	-0.678072	-0.95109	-0.710493	-1.16993	-0.485427	0.0874628	TRUE	FALSE	TRUE	FALSE	TRUE	FALSE
YBR153W	-0.263034	0	-0.584963	2	-1.58496	0	FALSE	FALSE	FALSE	FALSE	FALSE	FALSE
YBR154C	-1.94099	-2.3744	-1.77323	-2.02385	-1.7346	-1.5155	TRUE	TRUE	TRUE	TRUE	TRUE	TRUE
YBR155W	1.23704	0.736966	2.32193	4	1.56071	0.63743	FALSE	FALSE	FALSE	FALSE	TRUE	FALSE
YBR156C	-0.0524674	0.530515	0.879706	1.58496	1.10434	0	TRUE	FALSE	TRUE	FALSE	TRUE	FALSE
YBR157C	-0.298341	-0.893085	-0.389042	-0.695145	-0.350497	-0.584963	TRUE	TRUE	TRUE	TRUE	TRUE	FALSE
YBR158W	-2.53766	-2.56884	-2.61566	-1.90689	-2.09592	-1.62449	TRUE	FALSE	TRUE	FALSE	TRUE	TRUE
YBR159W	0.713696	-0.184425	1	0.530515	1.02308	0.371969	TRUE	TRUE	TRUE	FALSE	TRUE	FALSE
YBR160W	-1.08746	-0.321928	-0.280108	0.63743	-0.621488	-0.830075	FALSE	FALSE	FALSE	FALSE	FALSE	FALSE
YBR161W	0.567041	-0.773724	-0.157541	-0.550197	0.0671142	-0.860597	TRUE	TRUE	TRUE	TRUE	TRUE	TRUE
YBR162C	-0.374396	0.447459	0.455679	0.469485	-0.527247	-0.89812	TRUE	FALSE	TRUE	FALSE	TRUE	TRUE
YBR162W-A	1.72455	0.584963	2.27964	1.19878	2.16636	1.73081	TRUE	TRUE	TRUE	TRUE	TRUE	TRUE
YBR163W	NA	-0.874469	-2.58496	NA	-2	-3.45943	FALSE	FALSE	FALSE	FALSE	FALSE	FALSE
YBR164C	0.643856	0.534336	0.877143	1.06413	0.540568	0.498806	TRUE	TRUE	TRUE	TRUE	TRUE	TRUE
YBR165W	-1.90689	-0.70044	-2.70044	-0.777608	-3.45943	-1.078	FALSE	FALSE	FALSE	FALSE	FALSE	FALSE
YBR166C	1.11548	-1.89308	1.04439	0.36257	0.0443941	-0.263034	FALSE	FALSE	FALSE	FALSE	TRUE	FALSE
YBR167C	0.76184	0.874469	1.19265	0.552541	1.03747	1.55459	TRUE	FALSE	TRUE	FALSE	TRUE	FALSE
YBR168W	-1.5025	-0.152003	0	-1.73697	-2.16993	0.263034	FALSE	FALSE	FALSE	FALSE	FALSE	FALSE
YBR169C	0.321928	0	0.398549	0.862496	-0.321928	0.494765	FALSE	TRUE	TRUE	FALSE	FALSE	TRUE
YBR170C	0.214125	-0.465664	1.07276	-0.353637	0.710493	0.271302	TRUE	TRUE	TRUE	FALSE	TRUE	TRUE
YBR171W	-0.662965	-1.37197	-0.121991	-0.540568	-0.360747	-0.55849	TRUE	FALSE	TRUE	TRUE	TRUE	TRUE
YBR172C	-0.607683	-0.884523	-0.283793	-0.115477	0.231326	0.192645	TRUE	FALSE	TRUE	FALSE	TRUE	FALSE
YBR173C	0.377367	-0.102362	0.993487	0.253119	1.03592	-0.217357	TRUE	TRUE	TRUE	TRUE	TRUE	TRUE
YBR175W	-2.66297	-2.48543	-0.881356	-2	-1.19265	-1.96347	FALSE	FALSE	FALSE	FALSE	TRUE	FALSE
YBR176W	-1	NA	-1	0	-1.32193	NA	FALSE	FALSE	FALSE	FALSE	FALSE	FALSE
YBR177C	-0.788496	-2.16993	-0.222392	-1.18442	-1.75002	-1.27009	FALSE	FALSE	TRUE	FALSE	FALSE	FALSE
YBR179C	0.63743	0.796467	0.784271	1.58496	1.20645	1.20163	FALSE	FALSE	FALSE	FALSE	FALSE	TRUE
YBR180W	0	NA	0	NA	NA	NA	FALSE	FALSE	FALSE	FALSE	FALSE	FALSE
YBR181C	1.33121	1.21057	1.30666	0.884523	0.927488	1.35509	TRUE	TRUE	TRUE	TRUE	TRUE	TRUE
YBR181C	NA	NA	NA	NA	NA	NA	FALSE	FALSE	FALSE	FALSE	FALSE	FALSE
YBR182C	-2.32193	0	-2.80735	NA	-0.415037	-1.80735	FALSE	FALSE	FALSE	FALSE	FALSE	FALSE
YBR182C-A	NA	NA	NA	NA	NA	0	FALSE	FALSE	FALSE	FALSE	FALSE	FALSE
YBR183W	-2.16993	0.63743	1.32193	NA	-2.32193	0.584963	FALSE	FALSE	FALSE	FALSE	FALSE	FALSE
YBR184W	-1.58496	1	0.736966	NA	1	NA	FALSE	FALSE	FALSE	FALSE	FALSE	FALSE
YBR185C	1.53051	-0.263034	0.684498	-0.378512	0.823122	-0.678072	FALSE	FALSE	TRUE	FALSE	TRUE	TRUE
YBR186W	NA	-2.58496	NA	NA	0.584963	NA	FALSE	FALSE	FALSE	FALSE	FALSE	FALSE
YBR186W	NA	NA	NA	NA	NA	NA	FALSE	FALSE	FALSE	FALSE	FALSE	FALSE
YBR187W	0.520832	1	-0.321928	0	1	0.652077	TRUE	FALSE	TRUE	FALSE	FALSE	FALSE
YBR188C	-3.06609	-3.29278	-3.7625	-3.16993	-2.44478	-3	FALSE	FALSE	FALSE	FALSE	FALSE	FALSE
YBR189W	1.33312	1.65101	1.6742	2.1598	1.74402	2.30796	TRUE	TRUE	TRUE	TRUE	TRUE	TRUE
YBR189W	NA	NA	NA	NA	NA	NA	FALSE	FALSE	FALSE	FALSE	FALSE	FALSE
YBR191W	-0.127614	0.192645	0.297386	0.384664	0.113769	0.100227	TRUE	TRUE	TRUE	TRUE	TRUE	TRUE
YBR191W	NA	NA	NA	NA	NA	NA	FALSE	FALSE	FALSE	FALSE	FALSE	FALSE
YBR192W	-0.63743	NA	-1.36257	-1.87447	-0.917538	-2	FALSE	FALSE	FALSE	FALSE	FALSE	FALSE
YBR193C	0.378512	0.125531	-0.584963	-0.530515	-0.0995357	0.160465	FALSE	FALSE	FALSE	FALSE	FALSE	FALSE
YBR194W	-1.48543	-1.45943	-1.87447	-2	-1.28011	-0.289507	FALSE	FALSE	FALSE	FALSE	FALSE	FALSE
YBR195C	-0.415037	-1.32193	-1.926	-3.16993	-1.08746	-1.70044	FALSE	FALSE	FALSE	FALSE	FALSE	FALSE
YBR196C	-0.108934	-0.973033	-0.365649	-1.54432	-0.902703	-0.904422	TRUE	TRUE	TRUE	FALSE	TRUE	TRUE
YBR196C-A	NA	NA	NA	NA	NA	NA	FALSE	FALSE	FALSE	FALSE	FALSE	FALSE
YBR196C-B	0	NA	NA	NA	NA	NA	FALSE	FALSE	FALSE	FALSE	FALSE	FALSE
YBR197C	0.380031	-0.0995357	0.91983	0.684498	1.16559	0.428094	TRUE	TRUE	TRUE	TRUE	TRUE	TRUE
YBR198C	-1.63631	-1.65208	-2.01123	-2.20163	-2.08746	-1.32971	TRUE	TRUE	TRUE	FALSE	TRUE	TRUE
YBR199W	1.35364	0.0703893	1.75489	1.45943	2.41504	1.6477	FALSE	TRUE	FALSE	FALSE	FALSE	FALSE
YBR200W	0.395929	1	1.58496	2.58496	1.24101	1.30256	FALSE	FALSE	FALSE	FALSE	FALSE	FALSE
YBR200W-A	NA	NA	NA	NA	NA	NA	FALSE	FALSE	FALSE	FALSE	FALSE	FALSE
YBR201W	-0.415037	1	-0.662965	0.152003	-0.662965	-0.447459	FALSE	FALSE	FALSE	FALSE	FALSE	FALSE
YBR201C-A	NA	1	0	2.58496	NA	-0.321928	FALSE	FALSE	FALSE	FALSE	FALSE	FALSE
YBR202W	1.24793	2	1.25634	2.22239	1.32193	0.788496	TRUE	FALSE	TRUE	FALSE	TRUE	FALSE
YBR203W	NA	2.80735	0	0.222392	1.58496	0.584963	FALSE	FALSE	FALSE	FALSE	FALSE	FALSE
YBR204C	NA	0.485427	2.70044	3	1	1.70044	FALSE	FALSE	FALSE	FALSE	FALSE	FALSE
YBR205W	0.459432	2	1.152	3	1.48543	-0.321928	FALSE	FALSE	FALSE	FALSE	FALSE	FALSE
YBR207W	1.1375	0.736966	-0.347923	0.152003	0.736966	0.906891	FALSE	FALSE	FALSE	FALSE	FALSE	FALSE
YBR208C	-2.58496	NA	-2.16993	0	-1.58496	-0.459432	FALSE	FALSE	FALSE	FALSE	FALSE	FALSE
YBR210W	1.87447	2.90689	1.8365	1.41504	2	1.08746	FALSE	FALSE	FALSE	FALSE	FALSE	FALSE
YBR211C	-0.925999	-1.848	-1.08746	-0.652077	-1.51457	-1.20163	FALSE	FALSE	FALSE	FALSE	FALSE	FALSE
YBR212W	0.70044	-0.533432	-0.106915	0.0703893	-0.120294	0.75743	FALSE	TRUE	TRUE	TRUE	TRUE	TRUE
YBR213W	0.521953	-0.415037	0.874469	1	0.70044	1	TRUE	FALSE	TRUE	FALSE	TRUE	FALSE
YBR214W	-0.788496	-0.973365	-1.11103	-1.07566	-1	-0.760173	TRUE	TRUE	TRUE	TRUE	TRUE	TRUE
YBR215W	0.584963	0.241008	1.12553	0.807355	1.48543	0.523562	FALSE	FALSE	FALSE	FALSE	FALSE	FALSE
YBR215W	NA	NA	NA	NA	NA	NA	FALSE	FALSE	FALSE	FALSE	FALSE	FALSE
YBR216C	0.415037	0.289507	1.75489	-0.584963	1.078	2.39232	FALSE	FALSE	FALSE	FALSE	FALSE	FALSE
YBR217W	0.142958	-0.678072	0.584963	-0.736966	0.433897	0.0874628	TRUE	TRUE	TRUE	FALSE	TRUE	TRUE
YBR218C	-0.263034	-0.152003	0.63743	-1.22239	-0.137504	0	FALSE	FALSE	FALSE	FALSE	FALSE	FALSE
YBR219C	-0.423808	-1.30256	-0.115477	-0.36257	0.289507	-0.36257	TRUE	FALSE	TRUE	FALSE	TRUE	TRUE
YBR219C	NA	NA	NA	NA	NA	NA	FALSE	FALSE	FALSE	FALSE	FALSE	FALSE
YBR220C	-0.152003	-1	NA	1.32193	1.22239	NA	FALSE	FALSE	FALSE	FALSE	FALSE	FALSE
YBR221C	-0.0339473	-0.0614005	-0.263034	0.716207	-0.208587	0.209453	TRUE	TRUE	TRUE	FALSE	TRUE	TRUE
YBR221W-A	NA	NA	NA	NA	NA	NA	FALSE	FALSE	FALSE	FALSE	FALSE	FALSE
YBR222C	0.485427	0.415037	0.584963	1.80735	-0.222392	-0.415037	FALSE	FALSE	FALSE	FALSE	FALSE	FALSE
YBR223C	-0.643856	-0.241008	-0.893085	0	-0.31034	-1.47393	FALSE	FALSE	FALSE	FALSE	TRUE	FALSE
YBR225W	-0.5025	-0.710493	-0.736966	-1.67807	-0.847997	-1	FALSE	FALSE	FALSE	FALSE	FALSE	FALSE
YBR227C	0	0.152003	-1.11548	1.58496	0.5025	-0.169925	FALSE	FALSE	FALSE	FALSE	FALSE	FALSE
YBR228W	NA	-3.58496	NA	NA	-4.52356	-2.58496	FALSE	FALSE	FALSE	FALSE	FALSE	FALSE
YBR229C	-0.321928	-1.32193	-0.485427	0	-1.45943	-1.28011	FALSE	FALSE	FALSE	FALSE	FALSE	FALSE
YBR230C	-0.285402	-0.516124	0	-1.09192	-0.137504	-0.784987	TRUE	TRUE	TRUE	TRUE	TRUE	TRUE
YBR230C	NA	NA	NA	NA	NA	NA	FALSE	FALSE	FALSE	FALSE	FALSE	FALSE
YBR230W-A	-0.289507	-0.263034	0.584963	-0.36257	0.823122	0	FALSE	FALSE	FALSE	FALSE	FALSE	FALSE
YBR231C	1.28951	0.432959	1.18442	0.736966	1.64386	1.73697	FALSE	TRUE	TRUE	FALSE	TRUE	FALSE
YBR233W	-0.415037	0.415037	-0.251539	0.514573	-0.807355	-0.584963	FALSE	FALSE	TRUE	FALSE	FALSE	FALSE
YBR233W-A	1.46949	1.22239	1.61891	-0.459432	1.35364	1.51457	FALSE	FALSE	FALSE	FALSE	FALSE	FALSE
YBR234C	3.12262	1.41213	3.27528	1.82018	2.59042	1.78746	TRUE	TRUE	TRUE	TRUE	TRUE	TRUE
YBR235W	-1	-0.807355	-2.80735	NA	-2	-0.584963	FALSE	FALSE	FALSE	FALSE	FALSE	FALSE
YBR236C	0.206451	0.807355	0.777608	1	1.4975	0.283793	FALSE	FALSE	TRUE	FALSE	FALSE	TRUE
YBR237W	0.263034	0.830075	1.44057	0	1.45943	0.415037	FALSE	FALSE	FALSE	FALSE	FALSE	FALSE
YBR238C	-1.04182	-0.36257	-1.04731	-0.263034	-1.27009	-1.37851	FALSE	FALSE	FALSE	FALSE	FALSE	FALSE
YBR239C	-1.90689	1	-1.37851	-0.807355	0.137504	-0.36257	FALSE	FALSE	FALSE	FALSE	FALSE	FALSE
YBR240C	-2.32193	-2.32193	-1.58496	-1.58496	-2.32193	-2.80735	FALSE	FALSE	FALSE	FALSE	FALSE	FALSE
YBR241C	0.736966	0.830075	1.87447	-1.37851	0.736966	0	FALSE	FALSE	FALSE	FALSE	FALSE	FALSE
YBR242W	-0.730813	-0.943416	-1.25987	-0.192645	-0.984893	-0.70044	TRUE	FALSE	TRUE	FALSE	TRUE	TRUE
YBR243C	4.05889	NA	2.97982	2.58496	3.10434	5.90689	FALSE	FALSE	FALSE	FALSE	FALSE	FALSE
YBR244W	-0.632268	-0.847997	-0.376563	-0.70044	-0.773229	-0.621488	TRUE	TRUE	TRUE	FALSE	TRUE	TRUE
YBR245C	NA	NA	NA	NA	NA	NA	FALSE	FALSE	FALSE	FALSE	FALSE	FALSE
YBR246W	-0.932886	-1.67807	-0.866733	0	-0.263034	-0.866733	FALSE	FALSE	FALSE	FALSE	TRUE	FALSE
YBR247C	0.0339473	0	0.0418202	-2	-0.397335	-0.584963	TRUE	FALSE	TRUE	FALSE	TRUE	FALSE
YBR248C	-0.222392	0.415037	0.736966	1.58496	1.22239	1.32193	FALSE	FALSE	FALSE	FALSE	FALSE	FALSE
YBR249C	-0.942373	-1.08866	-0.768881	-1.21412	-0.949016	-1.20493	TRUE	TRUE	TRUE	TRUE	TRUE	TRUE
YBR250W	NA	NA	NA	NA	NA	NA	FALSE	FALSE	FALSE	FALSE	FALSE	FALSE
YBR251W	1.09622	1.58496	0.610958	0.206451	0.841935	0.633872	TRUE	TRUE	TRUE	TRUE	TRUE	TRUE
YBR252W	0.874469	2.45943	-0.523562	0.321928	-0.0995357	1.77761	FALSE	FALSE	FALSE	FALSE	TRUE	FALSE
YBR253W	-0.263034	-0.280108	-0.0740006	-0.378512	0.0703893	-0.321928	FALSE	FALSE	FALSE	FALSE	TRUE	FALSE
YBR254C	-3.58496	-2.58496	-3.24793	0.584963	-1.08746	NA	FALSE	FALSE	FALSE	FALSE	FALSE	FALSE
YBR255W	2.44057	2.78136	3.24793	3	3.09954	3.12928	FALSE	FALSE	FALSE	FALSE	FALSE	FALSE
YBR255C-A	-1.07039	-4.75489	-0.115477	-1.58496	-0.0931094	-1.1375	FALSE	FALSE	FALSE	FALSE	FALSE	FALSE
YBR255C-A	NA	NA	NA	NA	NA	NA	FALSE	FALSE	FALSE	FALSE	FALSE	FALSE
YBR256C	-0.736966	0.616671	0.40439	0	1.42084	1.2115	FALSE	FALSE	TRUE	FALSE	TRUE	FALSE
YBR257W	0.263034	0.415037	1.1375	NA	0.378512	1.80735	FALSE	FALSE	FALSE	FALSE	FALSE	FALSE
YBR258C	0	0.321928	1.22239	-0.736966	-0.874469	0.584963	FALSE	FALSE	FALSE	FALSE	FALSE	FALSE
YBR259W	2	1.58496	0.584963	2	1.58496	1.58496	FALSE	FALSE	FALSE	FALSE	FALSE	FALSE
YBR260C	0.621488	-0.29956	0	-0.169925	0.0473057	0.440573	FALSE	FALSE	TRUE	FALSE	TRUE	FALSE
YBR261C	-1.06711	-1.24101	-0.518467	-0.765535	-1.06228	-0.443607	TRUE	FALSE	TRUE	FALSE	TRUE	TRUE
YBR262C	2.38466	2.06413	2.78361	2.848	2.79099	2.24286	FALSE	FALSE	TRUE	FALSE	TRUE	FALSE
YBR263W	-0.321928	-0.163499	0.61471	0.115477	0.459432	-0.0297473	TRUE	TRUE	TRUE	TRUE	TRUE	TRUE
YBR264C	0	-2.52356	-0.436099	-0.387023	-0.648528	-0.465664	TRUE	FALSE	TRUE	FALSE	TRUE	TRUE
YBR265W	2.89308	2.51096	2.5502	2.39855	4.05528	2.2115	FALSE	FALSE	TRUE	FALSE	FALSE	FALSE
YBR267W	0.514573	1.41504	1.152	NA	2.18057	-1	TRUE	FALSE	FALSE	FALSE	FALSE	FALSE
YBR268W	-0.0901978	-0.874469	-0.695994	-0.932886	-0.270089	-0.440573	TRUE	FALSE	TRUE	FALSE	TRUE	FALSE
YBR269C	-0.285402	-0.68281	-1.01282	-0.514573	-0.72792	0	TRUE	TRUE	TRUE	TRUE	TRUE	TRUE
YBR270C	1.77761	0.893085	1.1375	2.45943	1.58496	3.85798	FALSE	FALSE	FALSE	FALSE	FALSE	FALSE
YBR271W	2.24793	-0.485427	2.16993	NA	1	1.90689	FALSE	FALSE	FALSE	FALSE	TRUE	FALSE
YBR272C	-2	-0.263034	-0.485427	0.263034	-0.152003	1.73697	FALSE	FALSE	FALSE	FALSE	FALSE	FALSE
YBR273C	0.347923	0.906891	1.14684	2.41504	1.30256	-0.152003	FALSE	FALSE	FALSE	FALSE	FALSE	FALSE
YBR274W	1	-1	2	NA	0	1.58496	FALSE	FALSE	FALSE	FALSE	FALSE	FALSE
YBR275C	-0.584963	-0.415037	-1.32193	1	-0.63743	-2.45943	FALSE	FALSE	FALSE	FALSE	FALSE	FALSE
YBR276C	2.36923	2.96963	2.83289	3.45943	1.20163	3.43296	FALSE	FALSE	FALSE	FALSE	TRUE	FALSE
YBR278W	-1.12553	-1	-0.371969	4.24793	-1.54749	-0.788496	FALSE	FALSE	FALSE	FALSE	FALSE	FALSE
YBR279W	0.823122	0.357552	0.858824	1.07039	1.57531	1.0458	TRUE	TRUE	TRUE	TRUE	TRUE	TRUE
YBR280C	1.4361	-0.287282	0.347923	0.36257	0.475338	0.171953	FALSE	TRUE	TRUE	TRUE	TRUE	TRUE
YBR281C	1.32193	2.58496	2.08746	0.584963	1.24793	0.736966	FALSE	FALSE	FALSE	FALSE	FALSE	FALSE
YBR282W	1.30812	1.58496	1.86876	1.76553	2.41093	0.527247	TRUE	FALSE	TRUE	FALSE	TRUE	TRUE
YBR283C	-1.19265	-0.528379	-0.567685	-0.745427	-0.915111	-0.180572	TRUE	TRUE	TRUE	TRUE	TRUE	TRUE
YBR284W	1.58496	NA	-1	-0.584963	NA	-1.41504	FALSE	FALSE	FALSE	FALSE	FALSE	FALSE
YBR285W	-1	-0.469485	-0.222392	-2.70044	-1.09954	-1.11548	FALSE	FALSE	FALSE	FALSE	FALSE	FALSE
YBR286W	1.14202	2.02308	1.76081	2.04836	1.83954	1.922	TRUE	TRUE	TRUE	TRUE	TRUE	TRUE
YBR287W	1	1.32193	2.85798	2.11548	2.96963	2.5025	FALSE	FALSE	FALSE	FALSE	FALSE	FALSE
YBR288C	1.48543	-0.485427	1.75002	NA	2.14684	2.58496	FALSE	FALSE	FALSE	FALSE	FALSE	FALSE
YBR289W	-0.142019	-0.847997	0.169925	0.36257	0.328623	0.0824622	TRUE	FALSE	TRUE	FALSE	TRUE	FALSE
YBR290W	0.100694	-0.192645	0.101283	-0.163499	0.0542616	-0.161751	TRUE	TRUE	TRUE	TRUE	TRUE	TRUE
YBR291C	0.847997	0	1.32193	1	1	1	FALSE	FALSE	FALSE	FALSE	FALSE	FALSE
YBR293W	NA	NA	NA	NA	NA	NA	FALSE	FALSE	FALSE	FALSE	FALSE	FALSE
YBR294W	-0.819428	0.222392	0.643856	0.807355	-0.584963	-0.874469	FALSE	FALSE	FALSE	FALSE	FALSE	FALSE
YBR295W	-1.44057	-1.09954	-0.111031	1.37851	-0.0740006	0.192645	FALSE	FALSE	TRUE	FALSE	FALSE	FALSE
YBR296C	-0.485427	NA	-1	0	1.58496	NA	FALSE	FALSE	FALSE	FALSE	FALSE	FALSE
YBR296C-A	NA	NA	NA	NA	NA	NA	FALSE	FALSE	FALSE	FALSE	FALSE	FALSE
YBR297W	NA	0	0	-1.58496	0.415037	NA	FALSE	FALSE	FALSE	FALSE	FALSE	FALSE
YBR298C	2.32193	1.58496	0	-1.41504	0	-1.58496	FALSE	FALSE	FALSE	FALSE	FALSE	FALSE
YBR298C-A	NA	NA	NA	NA	NA	NA	FALSE	FALSE	FALSE	FALSE	FALSE	FALSE
YBR299W	NA	NA	NA	NA	NA	-1.58496	FALSE	FALSE	FALSE	FALSE	FALSE	FALSE
YBR301W	-1.58496	NA	0	NA	-2.32193	-1	FALSE	FALSE	FALSE	FALSE	FALSE	FALSE
YBR302C	NA	NA	NA	-6.2854	NA	NA	FALSE	FALSE	FALSE	FALSE	FALSE	FALSE
YCL073C	NA	NA	NA	NA	NA	NA	FALSE	FALSE	FALSE	FALSE	FALSE	FALSE
YCL069W	NA	NA	NA	NA	NA	NA	FALSE	FALSE	FALSE	FALSE	FALSE	FALSE
YCL068C	NA	NA	NA	NA	NA	NA	FALSE	FALSE	FALSE	FALSE	FALSE	FALSE
YCL067C	NA	NA	NA	NA	NA	NA	FALSE	FALSE	FALSE	FALSE	FALSE	FALSE
YCL066W	NA	NA	NA	NA	NA	NA	FALSE	FALSE	FALSE	FALSE	FALSE	FALSE
YCL064C	-0.736966	1.32193	0.584963	1.22239	1.58496	2.45943	FALSE	FALSE	FALSE	FALSE	FALSE	FALSE
YCL063W	0.823122	2.16993	1.44746	NA	0.473931	0.169925	FALSE	FALSE	FALSE	FALSE	FALSE	FALSE
YCL061C	1.26303	-0.263034	1.16993	-0.847997	0.807355	-0.415037	FALSE	FALSE	FALSE	FALSE	TRUE	FALSE
YCL059C	-0.263034	0	-0.392317	-0.485427	-0.896164	-3.64386	TRUE	FALSE	TRUE	FALSE	TRUE	FALSE
YCL058C	NA	1.58496	NA	1.32193	1	1.45943	FALSE	FALSE	FALSE	FALSE	FALSE	FALSE
YCL058W-A	1.03622	0.847997	1.55722	3	2.04947	0.584963	TRUE	FALSE	TRUE	FALSE	TRUE	FALSE
YCL057C-A	0.596644	0.253757	0.388565	0.341037	0.321928	0.752072	TRUE	TRUE	TRUE	TRUE	TRUE	TRUE
YCL057W	-5.59991	-4.88753	-4.83007	-4.53605	-5.25873	-4.16993	FALSE	FALSE	FALSE	FALSE	FALSE	FALSE
YCL056C	-0.947533	-1.28011	-0.691878	-0.917538	-0.973033	-1.16993	FALSE	FALSE	FALSE	FALSE	TRUE	FALSE
YCL055W	-0.530515	0.321928	-0.754888	-0.514573	-1.03747	-1.16993	FALSE	FALSE	FALSE	FALSE	FALSE	FALSE
YCL054W	-0.0962153	-1	0.216811	-0.678072	0.72514	1.37851	TRUE	FALSE	TRUE	FALSE	TRUE	FALSE
YCL052C	0.884523	-0.125531	0.688056	1.82597	1.96963	1.3388	FALSE	TRUE	FALSE	FALSE	FALSE	FALSE
YCL051W	-0.176878	-0.357552	-1.05063	-1.89308	-0.231326	0.0901978	TRUE	TRUE	FALSE	FALSE	TRUE	TRUE
YCL050C	-0.391191	0.479993	-0.263034	-0.311944	-0.775785	-0.63941	TRUE	TRUE	TRUE	TRUE	TRUE	TRUE
YCL049C	0	0.321928	1.45943	1.80735	0.678072	2.58496	FALSE	FALSE	FALSE	FALSE	FALSE	FALSE
YCL048W-A	NA	1.58496	1	3.45943	1.58496	0	FALSE	FALSE	FALSE	FALSE	FALSE	FALSE
YCL048W	NA	NA	NA	NA	NA	NA	FALSE	FALSE	FALSE	FALSE	FALSE	FALSE
YCL047C	-0.245112	-1.79355	0.38109	-0.819428	0.163499	-1.43812	TRUE	FALSE	TRUE	FALSE	TRUE	TRUE
YCL045C	0.938599	0.678072	1.94753	1.8365	1.08092	1.92057	FALSE	FALSE	FALSE	FALSE	TRUE	FALSE
YCL044C	0.234465	0.652077	1.5502	0.874469	1.12928	1.05063	FALSE	FALSE	FALSE	FALSE	FALSE	FALSE
YCL043C	0.0888093	0.117357	0.209453	-0.0291463	0.183222	-0.384143	TRUE	TRUE	TRUE	TRUE	TRUE	TRUE
YCL042W	0.639002	0.84022	0.509555	0.494765	0.531156	0.537657	TRUE	TRUE	TRUE	TRUE	TRUE	TRUE
YCL040W	-0.498027	-0.176697	0.0573332	-0.195256	-0.153351	-0.120016	TRUE	TRUE	TRUE	TRUE	TRUE	TRUE
YCL039W	0.180572	-1.03395	0.584963	-2	0.900464	-2.08746	FALSE	TRUE	FALSE	FALSE	FALSE	FALSE
YCL038C	-1	-1	-1	0.584963	-1.58496	NA	FALSE	FALSE	FALSE	FALSE	FALSE	FALSE
YCL037C	-0.459432	-0.691878	-0.494765	0.169925	-0.550197	-0.10497	TRUE	FALSE	TRUE	TRUE	TRUE	TRUE
YCL036W	-0.152003	NA	-0.226771	1.58496	0.447459	0.736966	TRUE	FALSE	TRUE	FALSE	TRUE	FALSE
YCL035C	0.316027	0.174498	0.132104	0.311944	0.567041	0.110424	TRUE	TRUE	TRUE	TRUE	TRUE	TRUE
YCL034W	1.67377	1.21501	3.04731	1.35755	2.32193	1.38702	TRUE	TRUE	FALSE	FALSE	TRUE	TRUE
YCL033C	-2.70044	NA	-2.32193	-3.80735	-3.04439	-3.16993	FALSE	FALSE	FALSE	FALSE	FALSE	FALSE
YCL032W	1.5025	0.900464	1.06711	1.19265	1.64046	1.76553	FALSE	FALSE	TRUE	FALSE	FALSE	FALSE
YCL031C	2.57116	1.74147	2.75161	2.21501	2.86408	1.9349	TRUE	TRUE	TRUE	TRUE	TRUE	TRUE
YCL030C	-1.34395	-3.80735	-1.71621	-0.736966	-1.30256	-2.16993	FALSE	FALSE	FALSE	FALSE	FALSE	FALSE
YCL029C	0.5025	0.70044	2.44478	1	1.58496	2.05889	TRUE	FALSE	FALSE	FALSE	FALSE	FALSE
YCL028W	0.152003	-0.652077	-0.160465	1.24793	0	0.710493	FALSE	FALSE	FALSE	FALSE	FALSE	FALSE
YCL027W	2.22239	-0.584963	2.05063	1.90689	1.30812	1.58496	FALSE	FALSE	FALSE	FALSE	TRUE	FALSE
YCL026C-B	-2.32193	-2.58496	0.169925	0	-1.16993	-0.584963	FALSE	FALSE	FALSE	FALSE	FALSE	FALSE
YCL026C-A	NA	NA	NA	NA	NA	NA	FALSE	FALSE	FALSE	FALSE	FALSE	FALSE
YCL025C	2.45943	2.43741	3.14505	2.45943	2.62244	1.96347	FALSE	FALSE	FALSE	FALSE	FALSE	TRUE
YCL024W	2.32193	1	0.584963	-1.58496	-0.874469	NA	FALSE	FALSE	FALSE	FALSE	FALSE	FALSE
YCL021W-A	0	0.280108	-0.192645	-1.1375	-0.584963	-1.848	FALSE	FALSE	FALSE	FALSE	FALSE	FALSE
YCL018W	NA	NA	NA	NA	NA	NA	FALSE	FALSE	FALSE	FALSE	FALSE	FALSE
YCL017C	-0.544321	-0.722466	-0.831877	-0.612977	-0.241008	-1.03242	TRUE	TRUE	TRUE	FALSE	TRUE	TRUE
YCL016C	-1.41504	-0.807355	-0.241008	-1.58496	0.387023	-0.152003	FALSE	FALSE	FALSE	FALSE	FALSE	FALSE
YCL014W	-1.80735	1.16993	0	NA	-1.32193	0.736966	FALSE	FALSE	FALSE	FALSE	FALSE	FALSE
YCL012C	-1.30485	-0.900464	-0.572579	-1.36257	-0.634716	-0.652077	FALSE	FALSE	TRUE	FALSE	TRUE	TRUE
YCL012C	NA	NA	NA	NA	NA	NA	FALSE	FALSE	FALSE	FALSE	FALSE	FALSE
YCL011C	0.0946369	-0.037802	0.705817	-0.110424	0.699046	0.153246	TRUE	TRUE	TRUE	TRUE	TRUE	TRUE
YCL010C	-0.125531	-0.280108	0.443607	1.07039	0.0443941	1.18057	TRUE	FALSE	TRUE	FALSE	TRUE	FALSE
YCL009C	-0.520832	-0.404842	0.226135	-0.0183785	0.17897	0.259387	TRUE	TRUE	TRUE	TRUE	TRUE	TRUE
YCL008C	-0.719892	-0.616671	-1.22239	0.29956	-0.0506261	-0.819428	FALSE	FALSE	FALSE	FALSE	TRUE	FALSE
YCL005W-A	-1.28011	-1.31034	-0.722466	-0.184425	-0.296132	-0.34645	TRUE	TRUE	TRUE	TRUE	TRUE	TRUE
YCL005W-A	NA	NA	NA	NA	NA	NA	FALSE	FALSE	FALSE	FALSE	FALSE	FALSE
YCL005W-A	NA	NA	NA	NA	NA	NA	FALSE	FALSE	FALSE	FALSE	FALSE	FALSE
YCL005W	-0.415037	-1.22239	1	0.678072	0	0.192645	FALSE	FALSE	FALSE	FALSE	FALSE	FALSE
YCL004W	0.807355	0.847997	0	2.58496	1.32193	1	FALSE	FALSE	FALSE	FALSE	FALSE	FALSE
YCL002C	3.41504	3.39232	2.24793	NA	2.80735	5.85798	FALSE	FALSE	FALSE	FALSE	FALSE	FALSE
YCL002C	NA	NA	NA	NA	NA	NA	FALSE	FALSE	FALSE	FALSE	FALSE	FALSE
YCL001W	1.61298	1.20163	2.02106	1.152	1.44057	1.10962	FALSE	FALSE	FALSE	FALSE	TRUE	FALSE
YCL001W-A	NA	NA	NA	NA	NA	NA	FALSE	FALSE	FALSE	FALSE	FALSE	FALSE
YCL001W-B	NA	NA	0	NA	-0.584963	NA	FALSE	FALSE	FALSE	FALSE	FALSE	FALSE
YCR002C	-0.343954	-1.32193	-0.156119	0.485427	-0.0995357	-0.133267	TRUE	FALSE	TRUE	FALSE	TRUE	TRUE
YCR003W	0.415037	-0.222392	0.415037	-0.378512	0.14439	-0.371969	FALSE	FALSE	FALSE	FALSE	FALSE	FALSE
YCR004C	0	0.584963	-0.180572	0.830075	1.16993	0.180572	FALSE	TRUE	FALSE	FALSE	FALSE	TRUE
YCR005C	-1.05708	-1.01886	-0.415037	-0.554589	-0.558947	-0.53927	TRUE	TRUE	TRUE	TRUE	TRUE	TRUE
YCR007C	0.236067	0.251539	0.879146	0.447459	0.748021	0.440573	TRUE	TRUE	TRUE	TRUE	TRUE	TRUE
YCR008W	-1.35908	-1.64508	-1.36134	-1.38793	-1.56224	-1.11839	TRUE	TRUE	TRUE	TRUE	TRUE	TRUE
YCR009C	0.0931094	0.0356239	0.415037	0.543142	0.636037	1.15433	TRUE	TRUE	TRUE	TRUE	TRUE	TRUE
YCR010C	NA	NA	NA	NA	NA	NA	FALSE	FALSE	FALSE	FALSE	FALSE	FALSE
YCR011C	0.678072	-0.215729	0.540568	0.552541	1.05445	0.270089	FALSE	TRUE	FALSE	FALSE	FALSE	TRUE
YCR012W	-1.84567	-1.61822	-1.71979	-1.6831	-1.61571	-1.54832	TRUE	TRUE	TRUE	TRUE	TRUE	TRUE
YCR014C	0.36257	0.485427	2.90689	1	2	1.32193	FALSE	FALSE	FALSE	FALSE	FALSE	FALSE
YCR015C	0.847997	1	2.70044	2.58496	2.80735	1.48543	FALSE	FALSE	FALSE	FALSE	FALSE	FALSE
YCR016W	-0.791413	-1	-0.321928	0.263034	0.371969	-1.73697	TRUE	FALSE	TRUE	FALSE	TRUE	FALSE
YCR017C	1.70044	1.87447	1.26303	1.87447	1.44057	1.89308	FALSE	FALSE	FALSE	FALSE	FALSE	FALSE
YCR018C	NA	NA	NA	NA	NA	NA	FALSE	FALSE	FALSE	FALSE	FALSE	FALSE
YCR019W	1	-2	-1.45943	-2.80735	0.584963	-0.459432	FALSE	FALSE	FALSE	FALSE	FALSE	FALSE
YCR020C	0.0931094	1.85798	2.26303	2.08746	1	0.160465	FALSE	FALSE	FALSE	FALSE	FALSE	FALSE
YCR020C-A	-0.0995357	0.547488	1.45943	0.862496	0.693897	-0.211504	TRUE	FALSE	TRUE	FALSE	TRUE	FALSE
YCR020W-B	-0.847997	0.584963	0.275634	-0.152003	0.633872	0.807355	FALSE	FALSE	FALSE	FALSE	TRUE	FALSE
YCR021C	-1	0.678072	-1.11548	-3.16993	-1.40599	-0.36257	TRUE	FALSE	TRUE	FALSE	TRUE	FALSE
YCR023C	0.584963	0.485427	1.16993	1	1	0.415037	FALSE	FALSE	FALSE	FALSE	FALSE	FALSE
YCR024C	2.08746	-1.1375	-0.415037	2.16993	0.459432	1.76553	FALSE	FALSE	FALSE	FALSE	FALSE	FALSE
YCR024C-B	-0.494109	1.20511	-0.130061	0.387023	-0.0120728	1.17403	TRUE	TRUE	TRUE	TRUE	TRUE	TRUE
YCR024C-A	-1.11471	-1.01963	-1.18057	-1	-1.06609	-0.703282	TRUE	TRUE	TRUE	TRUE	TRUE	TRUE
YCR026C	-0.830075	-1.58496	-0.63743	-1.80735	-1.58496	-1.078	FALSE	FALSE	FALSE	FALSE	FALSE	FALSE
YCR027C	0.616671	1.16993	0.321928	0.459432	-0.0506261	1.51457	FALSE	FALSE	TRUE	FALSE	TRUE	FALSE
YCR028C	1.58496	0	2	-1.58496	NA	3	FALSE	FALSE	FALSE	FALSE	FALSE	FALSE
YCR028C-A	-1	-0.765535	-1.08746	-1.80735	-0.169925	-1.078	FALSE	FALSE	FALSE	FALSE	TRUE	FALSE
YCR028C-A	NA	NA	NA	NA	NA	NA	FALSE	FALSE	FALSE	FALSE	FALSE	FALSE
YCR030C	-2.16993	-1.32193	-1	0	0.321928	-2.32193	FALSE	FALSE	FALSE	FALSE	FALSE	FALSE
YCR031C	-0.586581	0.4267	-0.0197182	0.393011	0.174412	0.469063	TRUE	TRUE	TRUE	TRUE	TRUE	TRUE
YCR031C	NA	NA	NA	NA	NA	NA	FALSE	FALSE	FALSE	FALSE	FALSE	FALSE
YCR032W	0.415037	-1	1	NA	NA	1.58496	FALSE	FALSE	FALSE	FALSE	FALSE	FALSE
YCR033W	-0.232661	-0.584963	-0.518467	-0.263034	-0.510962	-0.536053	TRUE	TRUE	TRUE	TRUE	TRUE	TRUE
YCR034W	0.465664	0.192645	0.342888	0.280108	0.105353	-0.106915	TRUE	FALSE	TRUE	FALSE	TRUE	TRUE
YCR035C	1.36257	-0.807355	0.893085	1.80735	1.63227	1.22239	FALSE	FALSE	FALSE	FALSE	FALSE	FALSE
YCR036W	-0.784271	-1.44057	0.0473057	-1.06413	-0.156119	-1	FALSE	FALSE	TRUE	FALSE	TRUE	TRUE
YCR037C	1.58496	0.847997	1.26303	NA	1.80735	0.736966	FALSE	FALSE	FALSE	FALSE	FALSE	FALSE
YCR038C	4.2854	4.08746	4.32193	NA	3.45943	3.32193	FALSE	FALSE	FALSE	FALSE	FALSE	FALSE
YCR039C	NA	NA	NA	NA	NA	NA	FALSE	FALSE	FALSE	FALSE	FALSE	FALSE
YCR040W	NA	NA	NA	NA	NA	NA	FALSE	FALSE	FALSE	FALSE	FALSE	FALSE
YCR042C	0.313158	-0.381871	0.397335	0.0544478	0.127756	0.551015	TRUE	TRUE	TRUE	TRUE	TRUE	TRUE
YCR043C	1.2854	0.874469	1.9386	1.45943	0.912537	1.1375	FALSE	FALSE	FALSE	FALSE	FALSE	FALSE
YCR044C	-3.87447	-5.45943	-2.822	-2.76081	-2.47999	-3.4021	FALSE	FALSE	FALSE	FALSE	FALSE	FALSE
YCR045C	NA	NA	NA	NA	NA	NA	FALSE	FALSE	FALSE	FALSE	FALSE	FALSE
YCR046C	-1.51096	-0.4975	-0.873552	-0.903324	-1.301	-0.962847	TRUE	TRUE	TRUE	TRUE	TRUE	TRUE
YCR047C	-0.0331669	0.906891	-0.249978	1.32193	-0.0274807	-1.19265	TRUE	FALSE	TRUE	FALSE	TRUE	FALSE
YCR048W	0.828234	0.868755	1.94429	1.4021	1.36528	1.29177	TRUE	TRUE	TRUE	FALSE	TRUE	TRUE
YCR050C	NA	NA	NA	NA	NA	NA	FALSE	FALSE	FALSE	FALSE	FALSE	FALSE
YCR051W	-0.719892	-1.24793	-0.435386	-0.485427	-0.18737	-0.568284	TRUE	FALSE	TRUE	TRUE	TRUE	TRUE
YCR052W	1.33184	2.71272	1.6612	1.77259	2.48352	2.30117	TRUE	FALSE	TRUE	FALSE	TRUE	FALSE
YCR053W	-0.184425	-1.47805	0.209923	-0.395929	0.0780025	-0.23816	TRUE	FALSE	TRUE	FALSE	TRUE	TRUE
YCR054C	-0.378512	1.58496	0.180572	1	0.788496	0.222392	FALSE	FALSE	FALSE	FALSE	FALSE	FALSE
YCR057C	3.15528	NA	4.96963	2.16993	2.88753	4.39232	FALSE	FALSE	FALSE	FALSE	FALSE	FALSE
YCR059C	-0.0660892	0.111031	0.278301	0.912537	0.726239	0.415037	TRUE	TRUE	TRUE	FALSE	TRUE	TRUE
YCR060W	-0.689071	-1.23704	-0.0151069	-0.304855	-0.504792	-0.807355	TRUE	FALSE	TRUE	FALSE	TRUE	TRUE
YCR061W	-0.485427	-0.415037	0	-0.115477	-0.415037	-0.473931	FALSE	TRUE	FALSE	FALSE	FALSE	FALSE
YCR063W	0.184425	0.152003	-1.30256	-0.485427	-0.118644	0.152003	TRUE	FALSE	FALSE	FALSE	TRUE	FALSE
YCR065W	-1.94753	-1.01381	-1.87971	-0.510195	-2.08927	-1.4975	TRUE	TRUE	TRUE	TRUE	TRUE	TRUE
YCR066W	1.29546	1.52356	2.63227	2.22239	2.32193	2.16993	FALSE	FALSE	FALSE	FALSE	FALSE	FALSE
YCR067C	-0.0588937	-0.378512	-1.078	-0.321928	-1	0.192645	TRUE	FALSE	FALSE	FALSE	FALSE	FALSE
YCR068W	-1.76553	-0.180572	-0.447459	0.584963	-0.925999	-0.415037	FALSE	FALSE	FALSE	FALSE	FALSE	FALSE
YCR069W	2.11042	2.01089	2.36737	2.08092	1.93681	1.95606	TRUE	TRUE	TRUE	TRUE	TRUE	TRUE
YCR071C	1.13124	1.44057	2.2076	1.28951	1.81943	1.97199	TRUE	FALSE	TRUE	FALSE	TRUE	FALSE
YCR072C	-0.321928	1	1.58496	0	0.514573	-0.584963	FALSE	FALSE	FALSE	FALSE	FALSE	FALSE
YCR073C	-2.1375	-4.24793	-4.24793	-1	-2.87447	-3.80735	FALSE	FALSE	FALSE	FALSE	FALSE	FALSE
YCR073W-A	1.22239	-0.63743	0.289507	0.485427	0.0780025	0.621488	FALSE	FALSE	FALSE	FALSE	FALSE	FALSE
YCR075C	-3.58496	-2	-1.32193	NA	-1.22239	-1	FALSE	FALSE	FALSE	FALSE	FALSE	FALSE
YCR075W-A	-0.839535	-0.5025	-1.30812	-1.16993	-0.800691	-0.667425	FALSE	FALSE	TRUE	FALSE	TRUE	FALSE
YCR076C	-2.45943	-2.26303	-1.37197	-1.76553	-0.584963	-0.415037	FALSE	FALSE	FALSE	FALSE	TRUE	TRUE
YCR077C	1.41143	1.86507	2.13493	1.51658	NA	NA	TRUE	TRUE	TRUE	TRUE	FALSE	FALSE
YCR079W	2.45943	1.26303	2.4021	2.32193	1.96347	1.97199	FALSE	FALSE	FALSE	FALSE	FALSE	FALSE
YCR081W	1.12928	2.69302	2.49643	4.55459	2.40439	2.30933	FALSE	FALSE	FALSE	FALSE	FALSE	TRUE
YCR082W	0.753839	0.952694	0.904843	1.30666	0.876852	1.19265	TRUE	TRUE	TRUE	FALSE	TRUE	TRUE
YCR083W	-0.402098	-1.76553	-1.35755	-1.87447	-1.32193	-1.27563	TRUE	FALSE	FALSE	FALSE	FALSE	FALSE
YCR084C	-0.799087	-1.58496	-1.3388	-1.49185	-1.17632	-0.723482	TRUE	FALSE	TRUE	FALSE	TRUE	TRUE
YCR086W	-0.459432	0.584963	-0.263034	1.80735	-0.874469	0.584963	FALSE	FALSE	FALSE	FALSE	FALSE	FALSE
YCR087C-A	0.228269	1.11548	1.08017	1.16993	1.03899	1.12553	TRUE	FALSE	TRUE	FALSE	TRUE	TRUE
YCR088W	-0.467126	-0.222392	0.5025	0.0544478	0.16711	-0.321928	TRUE	TRUE	TRUE	TRUE	TRUE	TRUE
YCR089W	-0.321928	-1.32193	-1.1375	-2.32193	-1.36257	-1.22239	FALSE	FALSE	FALSE	FALSE	FALSE	FALSE
YCR090C	-0.70044	0	-0.547488	-2.32193	-0.485427	0	FALSE	FALSE	FALSE	FALSE	FALSE	FALSE
YCR091W	1.58496	0	1.32193	-0.678072	1	0.836501	FALSE	FALSE	FALSE	FALSE	FALSE	FALSE
YCR092C	-0.70044	-1.58496	0.115477	NA	-0.206451	-1	FALSE	FALSE	FALSE	FALSE	FALSE	FALSE
YCR093W	1.23133	1.62803	1.56294	2.67807	1	1.88982	TRUE	FALSE	TRUE	FALSE	TRUE	FALSE
YCR094W	0.241008	-1	0.662965	0.584963	0.0995357	0.289507	FALSE	FALSE	FALSE	FALSE	FALSE	FALSE
YCR095C	2.70044	0.847997	4.75489	2.5025	2.90689	2.58496	FALSE	FALSE	FALSE	FALSE	FALSE	FALSE
YCR095W-A	-0.415037	-1.73697	-0.678072	-1.58496	-1.80735	-0.807355	FALSE	FALSE	FALSE	FALSE	FALSE	FALSE
YCR096C	NA	NA	NA	NA	NA	NA	FALSE	FALSE	FALSE	FALSE	FALSE	FALSE
YCR097W	-6.16323	-6.71425	-6.65821	NA	-5.91289	-6.88874	FALSE	FALSE	FALSE	FALSE	FALSE	FALSE
YCR097W	NA	NA	NA	NA	NA	NA	FALSE	FALSE	FALSE	FALSE	FALSE	FALSE
YCR097W	NA	NA	NA	NA	NA	NA	FALSE	FALSE	FALSE	FALSE	FALSE	FALSE
YCR098C	NA	NA	NA	NA	NA	0	FALSE	FALSE	FALSE	FALSE	FALSE	FALSE
YCR099C	0	0.321928	1	-0.415037	-1	-1.73697	FALSE	FALSE	FALSE	FALSE	FALSE	FALSE
YCR100C	1	2	2	1	NA	-1.32193	FALSE	FALSE	FALSE	FALSE	FALSE	FALSE
YCR101C	NA	-1.22239	NA	NA	-0.584963	-0.736966	FALSE	FALSE	FALSE	FALSE	FALSE	FALSE
YCR102C	NA	NA	NA	NA	NA	NA	FALSE	FALSE	FALSE	FALSE	FALSE	FALSE
YCR104W	NA	1.58496	NA	NA	NA	NA	FALSE	FALSE	FALSE	FALSE	FALSE	FALSE
YCR105W	NA	NA	NA	NA	NA	NA	FALSE	FALSE	FALSE	FALSE	FALSE	FALSE
YCR106W	0.736966	-0.415037	-0.765535	-1	0.347923	-0.415037	FALSE	FALSE	FALSE	FALSE	FALSE	FALSE
YCR107W	-0.584963	NA	0	-1	-1	NA	FALSE	FALSE	FALSE	FALSE	FALSE	FALSE
YCR108C	NA	NA	NA	NA	NA	NA	FALSE	FALSE	FALSE	FALSE	FALSE	FALSE
YDL248W	-1.18442	-2.32193	-0.517058	-1.32193	-1.1307	-1.19931	TRUE	FALSE	TRUE	FALSE	TRUE	TRUE
YDL247W	1	0	NA	NA	-1.58496	0	FALSE	FALSE	FALSE	FALSE	FALSE	FALSE
YDL246C	NA	NA	NA	NA	-2.32193	NA	FALSE	FALSE	FALSE	FALSE	FALSE	FALSE
YDL245C	NA	NA	NA	NA	NA	NA	FALSE	FALSE	FALSE	FALSE	FALSE	FALSE
YDL244W	NA	NA	NA	NA	NA	NA	FALSE	FALSE	FALSE	FALSE	FALSE	FALSE
YDL243C	1	NA	NA	NA	0.415037	NA	FALSE	FALSE	FALSE	FALSE	FALSE	FALSE
YDL241W	0.415037	0.736966	0.932886	NA	1.06413	0.807355	FALSE	FALSE	FALSE	FALSE	FALSE	FALSE
YDL240W	-0.103093	-0.283793	-0.160465	0.36257	0.389947	-0.89812	TRUE	TRUE	TRUE	FALSE	TRUE	TRUE
YDL239C	1.58496	0.847997	-0.321928	0.415037	0	-0.530515	FALSE	FALSE	FALSE	FALSE	FALSE	FALSE
YDL238C	1.58496	0.485427	-1.58496	1.32193	-1.80735	0	FALSE	FALSE	FALSE	FALSE	FALSE	FALSE
YDL237W	0.584963	0.469485	1.20645	0.628031	1.66297	1.48543	FALSE	FALSE	FALSE	FALSE	FALSE	FALSE
YDL236W	0.584963	NA	0	-1	1	2.58496	FALSE	FALSE	FALSE	FALSE	FALSE	FALSE
YDL235C	0.263034	1.22239	0.169925	0.70044	1.44057	1.24793	FALSE	FALSE	FALSE	FALSE	FALSE	FALSE
YDL234C	0.683526	0.485427	2.03814	1.26303	1.42884	1.2578	TRUE	TRUE	TRUE	FALSE	TRUE	TRUE
YDL233W	1.34792	0.473931	0.526069	1.87447	1.46713	0.584963	FALSE	FALSE	TRUE	FALSE	FALSE	TRUE
YDL232W	1.78241	0.796467	2.83954	2.44478	2.51096	2.04629	TRUE	FALSE	FALSE	FALSE	TRUE	TRUE
YDL231C	-2	-1.20163	-1.90689	-1.45943	-1.66297	-3.24793	FALSE	FALSE	FALSE	FALSE	FALSE	FALSE
YDL230W	1.09954	0.263034	1.80735	0.893085	1.82103	1.45943	FALSE	FALSE	FALSE	FALSE	FALSE	FALSE
YDL229W	-1.13284	-0.953706	-0.98388	-0.75269	-0.572788	-1.36587	TRUE	TRUE	TRUE	TRUE	TRUE	TRUE
YDL227C	2.52607	3	3.92427	3.45943	3.75132	3.45943	TRUE	FALSE	FALSE	FALSE	FALSE	FALSE
YDL226C	0.883186	0.400538	1.36923	0.719892	1.50619	1.30378	TRUE	TRUE	TRUE	FALSE	TRUE	TRUE
YDL225W	0.485427	0.925999	1.60666	0.514573	2.16993	1.94753	TRUE	FALSE	TRUE	FALSE	FALSE	FALSE
YDL224C	0.643856	0.70044	0.231326	-0.906891	0.807355	-0.378512	FALSE	FALSE	TRUE	FALSE	FALSE	TRUE
YDL223C	-0.447459	-0.567475	-0.0740006	-0.464919	-0.504043	-0.424611	TRUE	TRUE	TRUE	TRUE	TRUE	TRUE
YDL222C	-1.43686	-1.14864	-1.62936	-0.920221	-2.07241	-1.0662	TRUE	TRUE	TRUE	TRUE	TRUE	TRUE
YDL220C	1	0.584963	1.71621	2.58496	0.540568	0.106915	FALSE	FALSE	FALSE	FALSE	FALSE	FALSE
YDL219W	0.479168	0	-0.128324	-0.206451	0	0.273018	TRUE	FALSE	TRUE	FALSE	TRUE	TRUE
YDL219W	NA	NA	NA	NA	NA	NA	FALSE	FALSE	FALSE	FALSE	FALSE	FALSE
YDL218W	NA	NA	0	NA	NA	NA	FALSE	FALSE	FALSE	FALSE	FALSE	FALSE
YDL217C	-2.58496	-2.32193	-0.652077	1	-1.76553	1	FALSE	FALSE	FALSE	FALSE	FALSE	FALSE
YDL216C	-2.20163	-0.652077	-0.862496	-0.36257	-0.50696	-0.584963	FALSE	TRUE	FALSE	FALSE	FALSE	TRUE
YDL215C	2	0	0	-1.58496	-0.321928	-1	FALSE	FALSE	FALSE	FALSE	FALSE	FALSE
YDL214C	NA	-2.32193	-1	-0.621488	NA	-0.547488	FALSE	FALSE	FALSE	FALSE	FALSE	FALSE
YDL213C	-1.27633	-2.08746	-1.14684	-0.874469	-1.08194	-0.628031	TRUE	FALSE	TRUE	FALSE	TRUE	TRUE
YDL212W	1.53605	2.41504	2.22239	2.16993	2.03242	2.28951	FALSE	FALSE	FALSE	FALSE	FALSE	FALSE
YDL211C	0.378512	1.58496	1.58496	NA	0.847997	1.80735	FALSE	FALSE	FALSE	FALSE	FALSE	FALSE
YDL210W	NA	NA	NA	NA	NA	NA	FALSE	FALSE	FALSE	FALSE	FALSE	FALSE
YDL209C	1.27302	-0.0641303	2.12776	0.736966	1.22239	0.716207	TRUE	TRUE	TRUE	FALSE	TRUE	FALSE
YDL208W	0.828047	0.822213	1.18989	1.22707	1.42922	0.856034	TRUE	TRUE	TRUE	TRUE	TRUE	TRUE
YDL207W	2.96083	3.11548	2.38391	2.23266	2.51048	2.64636	TRUE	FALSE	TRUE	TRUE	TRUE	TRUE
YDL206W	-3.45943	-1.58496	-1.32193	NA	-1	0	FALSE	FALSE	FALSE	FALSE	FALSE	FALSE
YDL205C	-3.54432	-3.20163	-3.49825	-3.84549	-3.1822	-3.29624	FALSE	FALSE	FALSE	FALSE	FALSE	FALSE
YDL204W	2	-2.57531	-2.45943	-2.3599	-2.32193	-2.67094	FALSE	TRUE	FALSE	FALSE	FALSE	FALSE
YDL203C	-0.137504	-3.90689	-1.11548	1	0.180572	0.36257	FALSE	FALSE	FALSE	FALSE	FALSE	FALSE
YDL202W	-0.0418202	0.341037	0.719892	0.807355	1	0.646363	TRUE	FALSE	TRUE	FALSE	TRUE	TRUE
YDL201W	-1.64155	-2.73697	-0.672425	-1.19265	-0.623437	-0.584963	TRUE	FALSE	TRUE	FALSE	TRUE	FALSE
YDL200C	-1	-0.652077	0.241008	NA	-1.09954	1.32193	FALSE	FALSE	FALSE	FALSE	FALSE	FALSE
YDL199C	-0.321928	-1.05063	0.415037	0.447459	0	1.078	FALSE	FALSE	FALSE	FALSE	FALSE	FALSE
YDL198C	0.584963	0.263034	1.18903	1.20163	0.979241	0.120294	TRUE	FALSE	TRUE	FALSE	TRUE	TRUE
YDL197C	4.24793	2.78427	1.53051	3.22239	1.29956	1.96683	FALSE	FALSE	FALSE	FALSE	FALSE	FALSE
YDL195W	-0.485427	-1.09954	-0.678072	-1.87447	-1	0.36257	FALSE	FALSE	FALSE	FALSE	FALSE	FALSE
YDL194W	1.32193	1.78427	1.39232	1.5025	0.884523	1.88452	FALSE	FALSE	FALSE	FALSE	FALSE	FALSE
YDL193W	-0.678072	0.0703893	-0.440573	-0.247928	0	0.234465	FALSE	TRUE	FALSE	FALSE	TRUE	FALSE
YDL192W	-0.499571	0	0.0356239	-0.392317	0.212994	0.0395284	TRUE	TRUE	TRUE	FALSE	TRUE	TRUE
YDL191W	-0.932702	-1.47354	-0.354866	-0.878009	-0.410586	-1.01825	TRUE	TRUE	TRUE	TRUE	TRUE	TRUE
YDL191W	NA	NA	NA	NA	NA	NA	FALSE	FALSE	FALSE	FALSE	FALSE	FALSE
YDL190C	0.662965	-0.152003	0.917538	0.530515	0.14439	0.917538	FALSE	FALSE	FALSE	FALSE	FALSE	FALSE
YDL189W	0.289507	-0.736966	1.58496	-0.584963	0.736966	0.678072	FALSE	FALSE	FALSE	FALSE	FALSE	FALSE
YDL188C	-0.874469	-1.33015	-0.968291	-1.29956	-0.807355	-1.04731	TRUE	TRUE	TRUE	TRUE	TRUE	TRUE
YDL186W	NA	NA	NA	NA	NA	NA	FALSE	FALSE	FALSE	FALSE	FALSE	FALSE
YDL185W	-0.464404	0.219781	-0.450661	-0.584963	-0.451696	0.232173	TRUE	TRUE	TRUE	TRUE	TRUE	TRUE
YDL184C	-0.816464	-0.876706	-0.329358	0.00533344	-0.13978	-0.339528	TRUE	TRUE	TRUE	TRUE	TRUE	TRUE
YDL183C	0	-1.73697	-1.58496	-1	NA	-1	FALSE	FALSE	FALSE	FALSE	FALSE	FALSE
YDL182W	-0.334419	1.90689	0.337035	0.137504	0.563901	0.415037	TRUE	FALSE	FALSE	FALSE	TRUE	TRUE
YDL181W	-0.442518	-0.459432	0.289507	-0.387023	-0.438884	-0.180572	TRUE	TRUE	TRUE	TRUE	TRUE	TRUE
YDL180W	-0.485427	-1	NA	0	NA	-1.73697	FALSE	FALSE	FALSE	FALSE	FALSE	FALSE
YDL179W	0	0.263034	0.736966	-0.415037	1.64386	0.906891	FALSE	FALSE	FALSE	FALSE	FALSE	FALSE
YDL178W	0.765535	1.26303	0.222392	-0.485427	0.459432	0	FALSE	FALSE	FALSE	FALSE	FALSE	FALSE
YDL177C	-0.607683	-0.415037	-0.63743	0.169925	0.241008	0.321928	TRUE	FALSE	FALSE	FALSE	TRUE	FALSE
YDL176W	-1.80735	0.584963	-1.73697	NA	-0.736966	-2	FALSE	FALSE	FALSE	FALSE	FALSE	FALSE
YDL175C	2.70044	2.32193	3.16993	2.32193	2.44057	1.974	FALSE	FALSE	FALSE	FALSE	FALSE	FALSE
YDL174C	0.368645	-0.127379	0.953206	-0.0317089	0.875672	0.531613	TRUE	TRUE	TRUE	TRUE	TRUE	TRUE
YDL173W	0.736966	0.893085	1.29022	0.696608	1.42421	1.15056	TRUE	TRUE	TRUE	TRUE	TRUE	TRUE
YDL171C	0	0.389947	0.621488	-0.321928	-0.61471	0	TRUE	TRUE	TRUE	FALSE	TRUE	TRUE
YDL170W	-1.07039	-1.80735	-1.36257	0	-0.447459	-1	FALSE	FALSE	FALSE	FALSE	FALSE	FALSE
YDL169C	NA	1.16993	1	1	1.65208	1.05445	FALSE	FALSE	FALSE	FALSE	FALSE	FALSE
YDL168W	1.04439	0.857981	0.827819	0.695145	1.04891	0.859822	FALSE	FALSE	TRUE	TRUE	TRUE	TRUE
YDL167C	0.736966	NA	1.62149	2	1.87447	1.41504	TRUE	FALSE	FALSE	FALSE	FALSE	FALSE
YDL166C	-0.0874628	-1.32193	0.275634	-2.16993	0.584963	0.807355	FALSE	FALSE	FALSE	FALSE	FALSE	FALSE
YDL165W	1.26919	0.469485	1.40372	1.70782	1.75364	1.30666	TRUE	TRUE	TRUE	FALSE	TRUE	TRUE
YDL164C	-1.80735	3.90689	0.777608	0.736966	1.48543	1.5025	FALSE	FALSE	FALSE	FALSE	FALSE	FALSE
YDL161W	-0.395929	0.247928	0.0671142	-0.137504	-0.192645	-1.41504	FALSE	FALSE	TRUE	FALSE	TRUE	FALSE
YDL160C-A	-2.58496	0	-1.48543	-0.736966	-1	-1	FALSE	FALSE	FALSE	FALSE	FALSE	FALSE
YDL160C	1.86736	1.96523	1.55102	3.59694	1.37851	1.95693	TRUE	TRUE	TRUE	FALSE	TRUE	TRUE
YDL159W-A	NA	NA	0	NA	NA	NA	FALSE	FALSE	FALSE	FALSE	FALSE	FALSE
YDL159W	0.473931	1.28951	1.72247	1	1.14439	0.263034	FALSE	FALSE	FALSE	FALSE	FALSE	TRUE
YDL157C	1.09954	1.32193	1	0.652077	1.9386	1.51457	FALSE	FALSE	FALSE	FALSE	FALSE	FALSE
YDL156W	-2.16993	-1.32193	-1.58496	NA	0	-1.45943	FALSE	FALSE	FALSE	FALSE	FALSE	FALSE
YDL155W	-0.716207	-0.584963	-0.0995357	-0.736966	-0.621488	-1.28011	FALSE	FALSE	FALSE	FALSE	FALSE	FALSE
YDL154W	NA	0	0	0	NA	1.58496	FALSE	FALSE	FALSE	FALSE	FALSE	FALSE
YDL153C	1.54432	NA	1.78427	-0.584963	1.77259	0.736966	FALSE	FALSE	FALSE	FALSE	FALSE	FALSE
YDL150W	-0.647698	-1.58496	-0.765535	-1.76553	-0.0356239	-2.52356	TRUE	FALSE	TRUE	FALSE	TRUE	FALSE
YDL149W	-0.206451	0	1	0.447459	0.584963	0.584963	FALSE	FALSE	FALSE	FALSE	FALSE	FALSE
YDL148C	1.03562	1.58496	3.32193	2.58496	1.27009	0.459432	TRUE	FALSE	FALSE	FALSE	FALSE	FALSE
YDL147W	-0.807355	-0.688056	-0.654865	-0.438121	-0.212545	-0.0465426	TRUE	TRUE	TRUE	TRUE	TRUE	TRUE
YDL146W	-0.415037	NA	NA	-1	NA	0	FALSE	FALSE	FALSE	FALSE	FALSE	FALSE
YDL145C	0.308122	0.874469	0.334419	-0.0473057	-0.171766	0.565597	TRUE	TRUE	TRUE	TRUE	TRUE	TRUE
YDL144C	1.76818	1.07529	1.61005	1.32193	1.63743	1.35364	TRUE	TRUE	TRUE	TRUE	TRUE	TRUE
YDL143W	2.62149	2.10236	2.25634	2.52356	2.43296	1.79751	TRUE	FALSE	TRUE	FALSE	TRUE	TRUE
YDL142C	-0.459432	0.485427	3.58496	-0.584963	1.45943	1	FALSE	FALSE	FALSE	FALSE	FALSE	FALSE
YDL141W	0.736966	0.736966	-0.63743	-1	-1.09954	0	FALSE	FALSE	FALSE	FALSE	FALSE	FALSE
YDL140C	-0.395929	0.192645	-0.353637	0	-0.584963	1.19265	FALSE	FALSE	FALSE	FALSE	FALSE	FALSE
YDL139C	1.1375	-0.137504	0.523562	0	2.54432	0.788496	FALSE	FALSE	FALSE	FALSE	FALSE	FALSE
YDL138W	0.576501	0.602036	0.874469	1.05063	0.530515	0.643856	TRUE	TRUE	TRUE	TRUE	TRUE	TRUE
YDL137W	0.331206	0.481533	0.21901	0.556393	0.125531	0.815575	TRUE	TRUE	TRUE	TRUE	TRUE	TRUE
YDL136W	0.479526	-0.14439	0.53579	0.311461	0.527512	-0.110703	TRUE	TRUE	TRUE	TRUE	TRUE	TRUE
YDL136W	NA	NA	NA	NA	NA	NA	FALSE	FALSE	FALSE	FALSE	FALSE	FALSE
YDL135C	-1.09954	-1	-0.0703893	-1.22239	0.50696	-1.52356	FALSE	FALSE	TRUE	FALSE	FALSE	FALSE
YDL134C	-1.52083	-1.27753	-0.881356	-0.584963	-1.22882	-1.06274	TRUE	TRUE	TRUE	TRUE	TRUE	TRUE
YDL133C-A	-0.148323	-0.174774	0.102848	0.257158	0.389947	0.124987	TRUE	TRUE	TRUE	TRUE	TRUE	TRUE
YDL133W	-1.70044	-1.71049	-2.80735	-4.24793	-2.05063	-4.12928	FALSE	FALSE	FALSE	FALSE	FALSE	FALSE
YDL132W	0.234465	-0.321928	0.847997	-0.263034	0.523562	-0.347923	TRUE	TRUE	TRUE	TRUE	TRUE	TRUE
YDL131W	1.078	0	0.782409	0.893085	0.947533	-0.5025	FALSE	TRUE	TRUE	FALSE	TRUE	TRUE
YDL130W-A	-0.782409	-0.26748	-0.059501	-0.373815	-0.0120728	-0.119299	TRUE	TRUE	TRUE	TRUE	TRUE	TRUE
YDL130W	-1.21871	-0.477702	-0.709053	-0.691878	-0.847211	-0.33787	TRUE	TRUE	TRUE	TRUE	TRUE	TRUE
YDL130W	NA	NA	NA	NA	NA	NA	FALSE	FALSE	FALSE	FALSE	FALSE	FALSE
YDL129W	-0.231326	0.321928	0.115477	1.58496	0.120294	0	TRUE	FALSE	FALSE	FALSE	TRUE	FALSE
YDL128W	0.0641303	1.48543	1.85415	1.80735	1.08746	1.35364	TRUE	FALSE	FALSE	FALSE	TRUE	FALSE
YDL127W	1.78427	-1	1.52356	2.32193	1	-0.263034	FALSE	FALSE	FALSE	FALSE	FALSE	FALSE
YDL126C	0.825971	-0.236067	1	0.654004	1.23857	0.33787	TRUE	TRUE	TRUE	TRUE	TRUE	TRUE
YDL125C	-1.87447	-1.05184	-2.08746	-1.66742	-2.01282	-1.69302	FALSE	TRUE	TRUE	FALSE	TRUE	TRUE
YDL125C	NA	NA	NA	NA	NA	NA	FALSE	FALSE	FALSE	FALSE	FALSE	FALSE
YDL124W	-0.434403	-0.13245	1.03181	0.443234	0.958724	0.59018	TRUE	TRUE	TRUE	TRUE	TRUE	TRUE
YDL123W	1.83007	0.68966	2.14048	2.02975	1.69302	1.29546	FALSE	TRUE	TRUE	FALSE	TRUE	TRUE
YDL122W	0.192645	0.584963	0.169925	-1.1375	0.371969	-0.447459	FALSE	FALSE	FALSE	FALSE	FALSE	FALSE
YDL121C	0.63743	0	0	1.58496	0.469485	0.125531	FALSE	FALSE	TRUE	FALSE	TRUE	FALSE
YDL120W	-1.31366	-0.90182	-1.21573	-1.03395	-1.03847	-1.58496	TRUE	TRUE	TRUE	TRUE	TRUE	TRUE
YDL119C	0.321928	-0.222392	1.45943	0.807355	1.77761	0.807355	FALSE	FALSE	FALSE	FALSE	FALSE	FALSE
YDL118W	NA	NA	NA	NA	NA	NA	FALSE	FALSE	FALSE	FALSE	FALSE	FALSE
YDL117W	-1.48543	-0.415037	-0.530515	-0.485427	-2.26303	-2.45943	FALSE	FALSE	FALSE	FALSE	FALSE	FALSE
YDL116W	2.32193	1.90689	2.27302	2.45943	2.62449	2.32193	FALSE	FALSE	FALSE	FALSE	FALSE	FALSE
YDL115C	1.32193	0.40439	2.10852	0.874469	1.93587	1.3505	TRUE	TRUE	FALSE	FALSE	TRUE	TRUE
YDL115C	NA	NA	NA	NA	NA	NA	FALSE	FALSE	FALSE	FALSE	FALSE	FALSE
YDL114W	NA	NA	NA	NA	NA	NA	FALSE	FALSE	FALSE	FALSE	FALSE	FALSE
YDL113C	-1.39232	-0.917538	-1.17585	-0.736966	-0.584963	-0.514573	FALSE	TRUE	TRUE	TRUE	TRUE	TRUE
YDL112W	-0.485427	0.263034	0.678072	-1.32193	-0.192645	0.584963	TRUE	FALSE	FALSE	FALSE	TRUE	FALSE
YDL111C	0.222392	-0.485427	-0.459432	1.22239	-0.395929	0.514573	FALSE	FALSE	FALSE	FALSE	FALSE	FALSE
YDL110C	-1.53051	-2.00637	-1.29956	-1.4549	-1.12711	-1.23406	TRUE	TRUE	TRUE	TRUE	TRUE	TRUE
YDL109C	1.41504	1	-0.514573	NA	1	0.584963	FALSE	FALSE	FALSE	FALSE	FALSE	FALSE
YDL108W	-1.41504	-0.628031	-0.253757	-1.45943	-1	-0.514573	FALSE	FALSE	TRUE	FALSE	TRUE	FALSE
YDL108W	NA	NA	NA	NA	NA	NA	FALSE	FALSE	FALSE	FALSE	FALSE	FALSE
YDL107W	1.65208	0.415037	0.777608	1.16993	0.900464	0.234465	FALSE	FALSE	FALSE	FALSE	FALSE	FALSE
YDL106C	0.13245	-0.209453	0.798366	-0.540568	0.46158	-0.17585	TRUE	TRUE	TRUE	TRUE	TRUE	TRUE
YDL105W	-0.0962153	-0.152003	-0.333424	-0.280108	0.180572	0.685891	TRUE	FALSE	TRUE	FALSE	TRUE	TRUE
YDL104C	-0.584963	NA	-1.80735	NA	-0.584963	-1	FALSE	FALSE	FALSE	FALSE	FALSE	FALSE
YDL103C	2.09954	1.94753	1.43063	1.48543	1.32193	1.41504	FALSE	FALSE	TRUE	FALSE	TRUE	FALSE
YDL102W	-0.447459	-1	-1.9386	-0.736966	-1.58496	-1.87447	FALSE	FALSE	FALSE	FALSE	FALSE	FALSE
YDL101C	0.847997	-1	1.22239	0.584963	1.90689	0.847997	FALSE	FALSE	FALSE	FALSE	FALSE	FALSE
YDL100C	0.664816	0.557995	1.0665	0.95109	1.49553	1.92057	TRUE	TRUE	TRUE	TRUE	TRUE	TRUE
YDL099W	-0.600393	-1.41504	-0.247928	-1.07039	0.369234	-0.347923	TRUE	FALSE	TRUE	FALSE	TRUE	TRUE
YDL098C	-0.788496	-0.469485	-0.925999	0.289507	-0.624491	-0.169925	FALSE	FALSE	TRUE	FALSE	TRUE	FALSE
YDL097C	0.736966	-0.289507	1.17932	0.321928	1.41093	0.289507	TRUE	TRUE	TRUE	TRUE	TRUE	TRUE
YDL095W	0	0.378512	0.490986	0.36257	0.436099	0.793549	TRUE	TRUE	TRUE	FALSE	TRUE	TRUE
YDL093W	3.64386	0.415037	3	1.87447	1.9542	3.16993	FALSE	FALSE	FALSE	FALSE	FALSE	FALSE
YDL092W	1.28345	0.853611	2.01078	1.85798	1.95676	1.47393	TRUE	TRUE	TRUE	TRUE	TRUE	TRUE
YDL091C	0.36257	-1.58496	0	0.485427	0.584963	-0.584963	FALSE	FALSE	FALSE	FALSE	FALSE	FALSE
YDL090C	-0.788496	-1.51457	-0.514573	-0.115477	-0.563901	-0.612977	FALSE	FALSE	TRUE	FALSE	TRUE	FALSE
YDL089W	0.137504	-0.70044	0.736966	-0.485427	0.263034	-0.137504	FALSE	FALSE	FALSE	FALSE	FALSE	FALSE
YDL088C	-0.647698	-0.395929	-0.630766	0.374396	-0.485427	-1.05311	TRUE	TRUE	TRUE	TRUE	TRUE	TRUE
YDL087C	-0.556393	-1.15754	0.321928	0.241008	-0.192645	-0.0506261	FALSE	FALSE	TRUE	FALSE	TRUE	TRUE
YDL086W	-3.80735	NA	-4.80735	NA	-2.20163	-4.2854	FALSE	FALSE	FALSE	FALSE	FALSE	FALSE
YDL085C-A	0.608421	0.82103	0.703607	-0.449803	0.355481	1.10962	TRUE	TRUE	TRUE	TRUE	TRUE	TRUE
YDL085W	1.58496	1.58496	NA	1.73697	-1	0.736966	FALSE	FALSE	FALSE	FALSE	FALSE	FALSE
YDL084W	-0.654733	-0.957565	-0.65501	-0.439285	-0.298596	-0.476028	TRUE	TRUE	TRUE	TRUE	TRUE	TRUE
YDL083C	0.0482956	0.27621	0.638967	1.28843	0.630405	0.636188	TRUE	TRUE	TRUE	TRUE	TRUE	TRUE
YDL083C	NA	NA	NA	NA	NA	NA	FALSE	FALSE	FALSE	FALSE	FALSE	FALSE
YDL082W	0.837729	1.12363	0.982667	1.15612	1.23756	0.851274	TRUE	TRUE	TRUE	TRUE	TRUE	TRUE
YDL082W	NA	NA	NA	NA	NA	NA	FALSE	FALSE	FALSE	FALSE	FALSE	FALSE
YDL081C	-0.783577	-0.186413	-0.790362	-0.787455	-0.786939	-0.00761318	TRUE	TRUE	TRUE	TRUE	TRUE	TRUE
YDL080C	0	-2.16993	-0.222392	-2.58496	-2.22239	-0.459432	FALSE	FALSE	FALSE	FALSE	FALSE	FALSE
YDL079C	-1.22239	0.263034	-0.321928	0.652077	-0.263034	-0.0780025	FALSE	FALSE	FALSE	FALSE	FALSE	FALSE
YDL079C	NA	NA	NA	NA	NA	NA	FALSE	FALSE	FALSE	FALSE	FALSE	FALSE
YDL078C	1.34395	0.559427	0.706269	0.29956	1.12928	0.584963	FALSE	FALSE	FALSE	FALSE	FALSE	TRUE
YDL077C	-0.736966	-0.222392	-1.16993	0	-0.321928	-0.36257	FALSE	FALSE	FALSE	FALSE	FALSE	FALSE
YDL076C	-0.917538	-0.822541	-1.16729	-0.669355	-1.31734	-0.86197	TRUE	TRUE	TRUE	TRUE	TRUE	TRUE
YDL075W	-0.64112	-0.179193	-0.381149	-0.0979984	-0.372582	-0.0860282	TRUE	TRUE	TRUE	TRUE	TRUE	TRUE
YDL075W	NA	NA	NA	NA	NA	NA	FALSE	FALSE	FALSE	FALSE	FALSE	FALSE
YDL074C	-0.0641303	-1	0.736966	3.80735	-0.103093	-0.137504	TRUE	FALSE	FALSE	FALSE	TRUE	FALSE
YDL073W	-0.847997	-0.222392	-1.44057	NA	-1.16993	-1.70044	FALSE	FALSE	FALSE	FALSE	FALSE	FALSE
YDL072C	0.505235	0.339486	1	0.514573	0.779874	0.270648	TRUE	TRUE	TRUE	TRUE	TRUE	TRUE
YDL070W	1.34183	0.574236	2.26243	1.34645	2.14171	0.933658	TRUE	TRUE	TRUE	TRUE	TRUE	TRUE
YDL069C	1.58496	-1	NA	NA	NA	NA	FALSE	FALSE	FALSE	FALSE	FALSE	FALSE
YDL067C	-0.907636	-0.946758	-0.141128	-0.672835	-0.207361	-0.488839	TRUE	TRUE	TRUE	TRUE	TRUE	TRUE
YDL066W	1.51785	1.33015	2.21392	2.74076	2.5008	2.23947	TRUE	TRUE	TRUE	FALSE	TRUE	TRUE
YDL065C	0.206451	-0.584963	0.387023	1	0.442518	-0.0565835	TRUE	FALSE	TRUE	FALSE	TRUE	TRUE
YDL064W	-0.165059	0.0347654	0.577976	0.424498	0.628906	0.495957	TRUE	TRUE	TRUE	TRUE	TRUE	TRUE
YDL064W	NA	NA	NA	NA	NA	NA	FALSE	FALSE	FALSE	FALSE	FALSE	FALSE
YDL063C	-0.736966	NA	0.415037	NA	0.584963	NA	FALSE	FALSE	FALSE	FALSE	FALSE	FALSE
YDL061C	-5.10154	NA	-4.90689	-4	-5.75489	-6.32193	FALSE	FALSE	FALSE	FALSE	FALSE	FALSE
YDL060W	1.80735	2.45943	1.82103	2	2.26497	2.45943	TRUE	FALSE	TRUE	FALSE	TRUE	FALSE
YDL059C	-0.523562	-0.321928	-0.234465	-1	-1	-0.192645	FALSE	FALSE	FALSE	FALSE	FALSE	FALSE
YDL058W	1.32193	-1.58496	-0.807355	1.32193	3.16993	-1.22239	FALSE	FALSE	FALSE	FALSE	FALSE	FALSE
YDL057W	0.736966	0.584963	1.58496	1.73697	1.04439	1.70044	FALSE	FALSE	FALSE	FALSE	FALSE	FALSE
YDL056W	-0.530515	0.514573	0.192645	0.36257	1.26303	0	FALSE	FALSE	FALSE	FALSE	FALSE	FALSE
YDL055C	-1.20511	-1.44746	-0.645335	-2.11548	-0.912537	-1.58496	TRUE	FALSE	TRUE	FALSE	TRUE	FALSE
YDL054C	-1	1	0.584963	0.807355	0	0	FALSE	FALSE	FALSE	FALSE	FALSE	FALSE
YDL053C	-1.42786	-1.38247	-0.736966	-1	-1.04439	-0.736966	TRUE	TRUE	TRUE	TRUE	TRUE	TRUE
YDL052C	0.245112	1.58496	0.222392	1.20163	1.14886	1.26849	TRUE	FALSE	TRUE	FALSE	TRUE	TRUE
YDL051W	0.575115	1	0.691247	0.765535	0.984117	1.38391	TRUE	TRUE	TRUE	TRUE	TRUE	TRUE
YDL049C	-1.58496	0	NA	1	NA	-1	FALSE	FALSE	FALSE	FALSE	FALSE	FALSE
YDL048C	1.48543	1.974	1.62803	1.37197	1.58496	2.38827	FALSE	FALSE	FALSE	FALSE	FALSE	FALSE
YDL047W	-1.3388	-0.103093	-0.118644	0.137504	-0.0473057	0.321928	FALSE	TRUE	TRUE	TRUE	TRUE	TRUE
YDL046W	0.378512	-0.27208	1.26679	0.667425	0.432959	0.121306	TRUE	TRUE	TRUE	TRUE	TRUE	TRUE
YDL045W-A	0.631355	0.123382	1.57586	1.22239	1.29123	1.41871	TRUE	TRUE	TRUE	TRUE	TRUE	TRUE
YDL045C	-1.45943	-1	0.652077	-1	-0.378512	-1.48543	FALSE	FALSE	FALSE	FALSE	FALSE	FALSE
YDL044C	0	0.485427	0.36257	0.415037	2.09954	1.1375	FALSE	FALSE	FALSE	FALSE	FALSE	FALSE
YDL043C	-0.0489096	1.848	0.736966	0.321928	0.514573	-0.415037	TRUE	FALSE	TRUE	FALSE	TRUE	FALSE
YDL042C	0.454566	0	1.26849	1.41504	1.47393	1.1375	TRUE	FALSE	TRUE	FALSE	FALSE	FALSE
YDL040C	1.47131	2.03953	2.35548	1.75002	2.61667	2.1822	TRUE	FALSE	FALSE	FALSE	FALSE	FALSE
YDL039C	0.387023	1.58496	1.22239	0	1	0	FALSE	FALSE	FALSE	FALSE	FALSE	FALSE
YDL037C	0.514573	NA	0	NA	1.58496	NA	FALSE	FALSE	FALSE	FALSE	FALSE	FALSE
YDL036C	-2.63227	-0.847997	-3.20163	-2.32193	-3.55459	-1.11548	FALSE	FALSE	FALSE	FALSE	FALSE	FALSE
YDL035C	1.58496	-0.245112	1.71621	-0.263034	0.678072	0.0874628	FALSE	TRUE	FALSE	FALSE	FALSE	TRUE
YDL033C	-1.32193	-2.58496	-0.862496	-1.67807	-0.793549	-0.378512	FALSE	FALSE	FALSE	FALSE	FALSE	FALSE
YDL031W	-0.29956	-1.58496	0.447459	-0.321928	0.241008	0.263034	TRUE	FALSE	TRUE	FALSE	TRUE	FALSE
YDL030W	2.5025	2.66297	0.584963	1.5025	1.25376	1	FALSE	FALSE	FALSE	FALSE	FALSE	FALSE
YDL029W	-1	-1.36257	-1.45943	-3.22239	-0.607683	-0.289507	FALSE	FALSE	FALSE	FALSE	TRUE	TRUE
YDL029W	NA	NA	NA	NA	NA	NA	FALSE	FALSE	FALSE	FALSE	FALSE	FALSE
YDL028C	0.269187	0.192645	0.111031	0.289507	0.765535	0.146841	TRUE	FALSE	TRUE	FALSE	TRUE	TRUE
YDL027C	0.283793	0.491853	0.754888	0.523562	1.05658	0.843274	TRUE	TRUE	TRUE	FALSE	TRUE	TRUE
YDL025C	1.14886	1.52154	2.40808	1.81714	1.41504	1.85042	TRUE	TRUE	FALSE	TRUE	TRUE	TRUE
YDL024C	0	-1.87447	-2	NA	-1	-0.678072	FALSE	FALSE	FALSE	FALSE	FALSE	FALSE
YDL022W	-1.47805	-1.70413	-1.32971	-1.03791	-1.53343	-1.1465	TRUE	TRUE	TRUE	TRUE	TRUE	TRUE
YDL021W	3.80735	1.1375	1.58496	0.514573	2	1.9386	FALSE	FALSE	FALSE	FALSE	FALSE	FALSE
YDL020C	-1.53687	-0.694708	-0.827819	-0.749457	-1.50654	-0.815575	TRUE	TRUE	TRUE	TRUE	TRUE	TRUE
YDL019C	0.584963	-2.37851	-0.415037	-0.169925	-2.41504	-0.793549	FALSE	FALSE	FALSE	FALSE	FALSE	FALSE
YDL018C	0.415037	0.415037	0.736966	1	0.321928	0.263034	FALSE	FALSE	FALSE	FALSE	FALSE	FALSE
YDL017W	-2.11548	-3.80735	-1.11548	-0.736966	-2.73697	-2.11548	FALSE	FALSE	FALSE	FALSE	FALSE	FALSE
YDL015C	0.106915	0.552541	0.514573	0.938599	0.156119	0.494765	TRUE	FALSE	TRUE	FALSE	TRUE	TRUE
YDL014W	-2.07923	-2.05889	-1.44746	-1.42884	-1.36854	-1.75743	TRUE	FALSE	TRUE	FALSE	TRUE	TRUE
YDL013W	-1.28011	-0.925999	-1.04439	-1.58496	-1.91754	-1.64386	FALSE	FALSE	FALSE	FALSE	FALSE	FALSE
YDL012C	-1.3442	-0.86148	-0.534558	-0.985353	-0.662965	-1.224	TRUE	TRUE	TRUE	TRUE	TRUE	TRUE
YDL012C	NA	NA	NA	NA	NA	NA	FALSE	FALSE	FALSE	FALSE	FALSE	FALSE
YDL010W	0.295456	-1	-1	-1	-1.30666	-0.378512	TRUE	FALSE	FALSE	FALSE	FALSE	FALSE
YDL008W	0.63743	-0.321928	0.485427	-0.485427	-0.241008	-0.893085	FALSE	FALSE	FALSE	FALSE	FALSE	FALSE
YDL007C-A	NA	NA	NA	NA	NA	NA	FALSE	FALSE	FALSE	FALSE	FALSE	FALSE
YDL007W	-0.794251	-0.710493	0.437809	0.339486	0.0482552	-0.244622	TRUE	TRUE	TRUE	TRUE	TRUE	TRUE
YDL006W	-1	-1.58496	-1.32193	NA	-1.58496	0.321928	FALSE	FALSE	FALSE	FALSE	FALSE	FALSE
YDL005C	0.662965	2	1.07039	0.192645	1.62803	1.05889	FALSE	FALSE	FALSE	FALSE	FALSE	FALSE
YDL004W	-0.23017	-0.613817	0.291998	0.550197	0.150641	-0.237395	TRUE	TRUE	TRUE	TRUE	TRUE	TRUE
YDL003W	-0.836501	-1.32193	-0.758992	NA	-1.1375	1	FALSE	FALSE	FALSE	FALSE	FALSE	FALSE
YDL002C	-0.82103	-0.736966	-0.342888	-0.443607	-0.392317	-0.818162	TRUE	TRUE	TRUE	TRUE	TRUE	TRUE
YDL001W	-1.15754	-0.584963	-3.20945	-0.280108	-1.32193	-0.430634	FALSE	FALSE	FALSE	FALSE	FALSE	TRUE
YDR001C	-0.591816	0.0655174	-0.676958	-0.106915	-0.554968	0.0627358	TRUE	TRUE	TRUE	TRUE	TRUE	TRUE
YDR002W	-1.86289	-1.84246	-1.93425	-1.88136	-1.77994	-1.65055	TRUE	TRUE	TRUE	TRUE	TRUE	TRUE
YDR003W	-1.1375	-0.612977	-1.152	-0.688056	-1	-0.174029	FALSE	FALSE	FALSE	FALSE	FALSE	TRUE
YDR003W-A	0.432959	1	1.45943	0.540568	0.836501	0.514573	TRUE	FALSE	FALSE	FALSE	FALSE	TRUE
YDR004W	NA	NA	NA	NA	NA	NA	FALSE	FALSE	FALSE	FALSE	FALSE	FALSE
YDR005C	1.08746	0.736966	2.22239	-0.169925	0.321928	0.234465	FALSE	FALSE	FALSE	FALSE	FALSE	FALSE
YDR005C	NA	NA	NA	NA	NA	NA	FALSE	FALSE	FALSE	FALSE	FALSE	FALSE
YDR006C	-0.479168	-0.0801703	-0.0962153	0.36257	-0.392317	0.186413	TRUE	TRUE	TRUE	TRUE	TRUE	TRUE
YDR007W	0.50696	0.341037	0.584963	0.530515	1.11548	1.2854	FALSE	FALSE	FALSE	FALSE	FALSE	FALSE
YDR009W	-1.58496	-1	NA	NA	-2.32193	-1	FALSE	FALSE	FALSE	FALSE	FALSE	FALSE
YDR011W	-0.169925	-0.111031	0.142958	0.0931094	0.0155969	-0.135352	TRUE	TRUE	TRUE	TRUE	TRUE	TRUE
YDR012W	-1.09412	-0.904843	-0.741807	-0.847997	-0.666677	-0.756074	TRUE	TRUE	TRUE	TRUE	TRUE	TRUE
YDR013W	0.807355	0.584963	-0.321928	2.32193	-0.289507	0	FALSE	FALSE	FALSE	FALSE	FALSE	FALSE
YDR014W	-0.874469	-1.58496	-0.415037	-1.52356	-0.754888	-0.662965	FALSE	FALSE	FALSE	FALSE	FALSE	FALSE
YDR014W-A	-2.80735	-1	-1	NA	-0.415037	NA	FALSE	FALSE	FALSE	FALSE	FALSE	FALSE
YDR016C	2.03953	1.24793	3.32193	3.32193	2.54057	2.54432	FALSE	FALSE	FALSE	FALSE	FALSE	FALSE
YDR017C	-1.76553	-3.80735	-1	-2.16993	-4	-1.58496	FALSE	FALSE	FALSE	FALSE	FALSE	FALSE
YDR018C	NA	NA	0	NA	NA	-1.58496	FALSE	FALSE	FALSE	FALSE	FALSE	FALSE
YDR019C	0.146841	0	1.51457	0.678072	0	0.447459	TRUE	FALSE	FALSE	FALSE	FALSE	FALSE
YDR020C	-0.4975	-1.22239	-0.63743	-0.415037	0.137504	-0.222392	FALSE	FALSE	FALSE	FALSE	FALSE	FALSE
YDR021W	-2.43296	0	-1	-1.58496	-1	-2	FALSE	FALSE	FALSE	FALSE	FALSE	FALSE
YDR022C	-1.85798	-0.229482	-0.695145	0.0824622	-1.19265	-0.125531	FALSE	TRUE	TRUE	FALSE	TRUE	TRUE
YDR023W	0.374848	0.198546	0.671051	0.263034	0.561879	0.628031	TRUE	TRUE	TRUE	TRUE	TRUE	TRUE
YDR025W	-0.944941	-0.695559	-0.504907	-0.338802	-0.304614	-0.263457	TRUE	TRUE	TRUE	TRUE	TRUE	TRUE
YDR025W	NA	NA	NA	NA	NA	NA	FALSE	FALSE	FALSE	FALSE	FALSE	FALSE
YDR026C	1.91427	1.078	1	1.80735	1.42626	1.72247	FALSE	FALSE	FALSE	FALSE	FALSE	FALSE
YDR027C	-0.192645	-1.32193	0.415037	-1.58496	-2.58496	-1.37851	FALSE	FALSE	FALSE	FALSE	FALSE	FALSE
YDR028C	0.10188	-0.380604	0.742504	-0.713696	0.294743	0.407175	TRUE	TRUE	TRUE	TRUE	TRUE	TRUE
YDR030C	NA	NA	NA	-1.58496	NA	NA	FALSE	FALSE	FALSE	FALSE	FALSE	FALSE
YDR031W	-0.584963	0	0.241008	0.222392	1.38702	-0.0588937	FALSE	FALSE	TRUE	FALSE	FALSE	TRUE
YDR032C	-0.76184	-1.22239	-1.44746	-1.04731	-1.12029	-0.880418	TRUE	TRUE	FALSE	FALSE	TRUE	TRUE
YDR033W	-0.0529489	-0.642448	0.0280144	-0.862496	0.359542	-0.643856	TRUE	TRUE	TRUE	FALSE	TRUE	FALSE
YDR034C	-0.14439	0.263034	0.436099	-1	-0.206451	-0.459432	FALSE	FALSE	FALSE	FALSE	FALSE	FALSE
YDR034C-A	NA	NA	NA	NA	NA	NA	FALSE	FALSE	FALSE	FALSE	FALSE	FALSE
YDR034W-B	-0.678072	-0.206451	2.41504	1.19265	1.29546	0.337035	FALSE	FALSE	FALSE	FALSE	FALSE	FALSE
YDR035W	-1.24207	-1.42084	-0.94596	-1.83289	-0.534657	-1.70044	TRUE	TRUE	TRUE	FALSE	TRUE	TRUE
YDR036C	-0.559427	0.765535	1.43296	0.241008	0.567041	0.0703893	FALSE	FALSE	FALSE	FALSE	TRUE	TRUE
YDR037W	-0.734148	-0.529253	-0.191818	-0.777608	-0.306103	-0.476028	TRUE	TRUE	TRUE	TRUE	TRUE	TRUE
YDR038C	1.80735	1.35364	1.09622	0.222392	1.79837	0.440573	FALSE	FALSE	TRUE	FALSE	TRUE	FALSE
YDR039C	1.56071	1.80735	0.668794	0.447459	1.5656	0.36257	TRUE	FALSE	TRUE	FALSE	TRUE	FALSE
YDR040C	-0.469485	-1.66297	-1.49476	-0.884523	-1.73697	-1.08153	FALSE	TRUE	FALSE	TRUE	FALSE	TRUE
YDR041W	0.146841	-0.415037	1.29546	0.530515	1.32971	0.405992	TRUE	FALSE	TRUE	FALSE	TRUE	TRUE
YDR042C	1.32193	NA	-1.58496	NA	1	NA	FALSE	FALSE	FALSE	FALSE	FALSE	FALSE
YDR043C	-1.926	-1.10806	-1.65535	-1.45943	-1.73697	-1.53152	TRUE	TRUE	TRUE	TRUE	TRUE	TRUE
YDR044W	-1.28011	0.192645	-2	-1.11548	-0.552541	1.32193	FALSE	FALSE	FALSE	FALSE	FALSE	FALSE
YDR045C	-1.22239	-1	-1	-1	-2	0	FALSE	FALSE	FALSE	FALSE	FALSE	FALSE
YDR046C	0.366782	-0.563901	-0.142958	-0.341037	0.0631938	0.427421	TRUE	TRUE	TRUE	FALSE	TRUE	TRUE
YDR047W	0.604071	0.70044	1.04439	1.12553	-0.142019	0.900464	TRUE	FALSE	FALSE	FALSE	TRUE	FALSE
YDR049W	0.874469	0.192645	0.552541	1.16993	0.50696	-0.125531	FALSE	FALSE	FALSE	FALSE	FALSE	FALSE
YDR050C	0.275146	0.14505	-0.0587093	0.14274	0.293612	0.299225	TRUE	TRUE	TRUE	TRUE	TRUE	TRUE
YDR051C	-1.11548	0	0.463947	-0.29956	0.0374747	0.180572	FALSE	TRUE	TRUE	FALSE	TRUE	TRUE
YDR052C	-1.58496	1.48543	0.263034	0	0.192645	0.321928	FALSE	FALSE	FALSE	FALSE	FALSE	FALSE
YDR054C	-0.896164	-0.253757	-0.321928	-0.91427	-0.947533	-0.065095	TRUE	TRUE	TRUE	TRUE	TRUE	TRUE
YDR055W	0.128324	1.14202	0.710493	0.247928	0.427421	1.92057	TRUE	TRUE	TRUE	FALSE	TRUE	FALSE
YDR056C	-1.30256	-0.943416	-0.978626	-2.16993	-0.874469	-0.943416	FALSE	FALSE	TRUE	FALSE	TRUE	TRUE
YDR057W	-0.847997	1.32193	1.44057	0.485427	1	1.90689	FALSE	FALSE	FALSE	FALSE	FALSE	FALSE
YDR058C	1.76553	1.68806	1.42626	2.5025	1.23447	1.43296	FALSE	FALSE	FALSE	FALSE	FALSE	TRUE
YDR059C	-0.206451	-0.887525	0.561879	-0.716207	0	-0.961526	FALSE	TRUE	TRUE	FALSE	TRUE	FALSE
YDR059C	NA	NA	NA	NA	NA	NA	FALSE	FALSE	FALSE	FALSE	FALSE	FALSE
YDR060W	-0.0310269	0.736966	-1.0614	0.584963	-0.504473	-1.32193	TRUE	FALSE	TRUE	FALSE	TRUE	FALSE
YDR061W	-0.36257	0.192645	-0.777608	-0.263034	-0.906891	1	FALSE	FALSE	FALSE	FALSE	FALSE	FALSE
YDR062W	-0.610958	-1.05247	-0.601451	-0.485427	-1.152	-0.504473	TRUE	TRUE	TRUE	TRUE	TRUE	TRUE
YDR063W	-0.0962153	-0.868755	0.283793	-1.62449	0	-0.718229	TRUE	TRUE	TRUE	FALSE	TRUE	TRUE
YDR064W	0.424715	0.0837684	0.704904	0.127112	0.723291	-0.194701	TRUE	TRUE	TRUE	TRUE	TRUE	TRUE
YDR064W	NA	NA	NA	NA	NA	NA	FALSE	FALSE	FALSE	FALSE	FALSE	FALSE
YDR065W	1.58496	0.415037	NA	-0.584963	1.80735	2.32193	FALSE	FALSE	FALSE	FALSE	FALSE	FALSE
YDR066C	1.58496	1.32193	0.807355	NA	-1	NA	FALSE	FALSE	FALSE	FALSE	FALSE	FALSE
YDR067C	0.893085	0.263034	2.26303	0.485427	0.29956	0.447459	FALSE	FALSE	FALSE	FALSE	FALSE	FALSE
YDR068W	0	-0.584963	1.32193	-0.415037	1.26303	-0.710493	TRUE	FALSE	TRUE	FALSE	TRUE	FALSE
YDR069C	-0.584963	-1.32193	2.32193	1	-2.32193	0.678072	FALSE	FALSE	FALSE	FALSE	FALSE	FALSE
YDR070C	-0.784271	-0.436986	-0.343954	-0.332575	0.658963	-0.385981	FALSE	TRUE	TRUE	TRUE	FALSE	TRUE
YDR071C	0.197939	0.630766	0.619728	0.536053	0.564785	0.241008	TRUE	TRUE	TRUE	TRUE	TRUE	TRUE
YDR072C	-0.584963	-0.321928	-0.241008	0	-0.115477	-0.106915	FALSE	FALSE	FALSE	FALSE	FALSE	FALSE
YDR073W	-1.07039	-0.874469	-1.08746	-1.45943	-1	-1.11548	TRUE	FALSE	FALSE	FALSE	FALSE	FALSE
YDR074W	-1.35496	-1.06001	-1.32577	-1.06538	-1.6893	-0.982513	TRUE	TRUE	TRUE	TRUE	TRUE	TRUE
YDR075W	-1.71621	-3.80735	-1.45943	-0.807355	-2.28011	-1	FALSE	FALSE	FALSE	FALSE	FALSE	FALSE
YDR076W	0	0	-0.736966	1	2.32193	NA	FALSE	FALSE	FALSE	FALSE	FALSE	FALSE
YDR077W	-0.131245	-0.152899	0.588306	-0.036005	0.517937	-0.445844	TRUE	TRUE	TRUE	TRUE	TRUE	TRUE
YDR078C	3.24793	2.90689	2.80735	3.58496	3.62449	2.08746	FALSE	FALSE	FALSE	FALSE	FALSE	FALSE
YDR079W	NA	1	1.87447	2.32193	0.807355	-0.736966	FALSE	FALSE	FALSE	FALSE	FALSE	FALSE
YDR079C-A	1.87447	-0.415037	1.22239	NA	2.70044	1.87447	FALSE	FALSE	FALSE	FALSE	FALSE	FALSE
YDR080W	1.27302	0.222392	1	1.19265	0.976541	1.558	TRUE	FALSE	TRUE	FALSE	TRUE	FALSE
YDR081C	-0.415037	0	-1.16993	-1.41504	-2	-0.736966	FALSE	FALSE	FALSE	FALSE	FALSE	FALSE
YDR082W	-0.206451	3.80735	-0.321928	0.584963	1.32193	1.22239	FALSE	FALSE	FALSE	FALSE	FALSE	FALSE
YDR083W	-0.115477	-0.485427	0.63743	-1	0.314511	0.415037	TRUE	FALSE	TRUE	FALSE	TRUE	FALSE
YDR084C	0.321928	1	-0.0874628	0.447459	1.36923	0.0780025	FALSE	FALSE	FALSE	FALSE	FALSE	FALSE
YDR085C	-1.26303	-1.32193	-0.485427	0.777608	0.584963	0.280108	FALSE	FALSE	FALSE	FALSE	FALSE	FALSE
YDR086C	-0.628031	-0.803143	-0.744441	-0.584963	-0.421827	-0.703799	TRUE	TRUE	TRUE	TRUE	TRUE	TRUE
YDR087C	-0.0740006	0	0.612977	1	0.605721	0.169925	FALSE	FALSE	FALSE	FALSE	TRUE	FALSE
YDR088C	-0.182203	0.407658	0.553936	0.544321	0.181607	0.566347	TRUE	TRUE	TRUE	TRUE	TRUE	TRUE
YDR089W	0.736966	0	NA	NA	2	1	FALSE	FALSE	FALSE	FALSE	FALSE	FALSE
YDR090C	0	-1.73697	-1.41504	-0.263034	-1.22239	-1	FALSE	FALSE	FALSE	FALSE	FALSE	FALSE
YDR091C	-0.634716	-0.206451	-1.20645	-0.628031	-0.877516	-0.839535	TRUE	FALSE	TRUE	FALSE	TRUE	FALSE
YDR092W	-0.656046	-1.43741	-0.968973	-0.847997	-1.22707	-1.15754	TRUE	TRUE	TRUE	TRUE	TRUE	TRUE
YDR092W	NA	NA	NA	NA	NA	NA	FALSE	FALSE	FALSE	FALSE	FALSE	FALSE
YDR093W	-0.234465	-0.321928	-1.39232	0	-0.616671	-0.736966	FALSE	FALSE	FALSE	FALSE	FALSE	FALSE
YDR096W	-0.900464	-1.79141	-1.04731	-0.959358	-2.58496	-1.69515	FALSE	FALSE	FALSE	FALSE	FALSE	TRUE
YDR097C	0.63743	0.321928	-0.0995357	NA	0.678072	-0.736966	FALSE	FALSE	TRUE	FALSE	TRUE	FALSE
YDR098C	NA	NA	NA	NA	NA	NA	FALSE	FALSE	FALSE	FALSE	FALSE	FALSE
YDR099W	-1.73697	-1.32193	-1.96963	-1.88753	-2.0163	-1.36923	TRUE	TRUE	FALSE	FALSE	TRUE	TRUE
YDR100W	0.678072	0.906891	5.08746	2.08746	2.54432	0.304855	FALSE	FALSE	FALSE	FALSE	FALSE	FALSE
YDR101C	0.567041	0	1.16993	1	1.02046	-0.29956	TRUE	FALSE	TRUE	FALSE	TRUE	FALSE
YDR103W	4.12102	3.82782	4.8679	3.80735	3.52356	2.80735	FALSE	FALSE	FALSE	FALSE	FALSE	FALSE
YDR104C	1.28011	2.80735	1.71621	2.41504	2.45943	2.5025	FALSE	FALSE	FALSE	FALSE	FALSE	FALSE
YDR105C	-0.584963	-0.415037	0.584963	-1.58496	NA	-1	FALSE	FALSE	FALSE	FALSE	FALSE	FALSE
YDR106W	NA	NA	NA	NA	NA	-1	FALSE	FALSE	FALSE	FALSE	FALSE	FALSE
YDR107C	-3	-1.16993	-2	-1.58496	-2.22239	-2.11548	FALSE	FALSE	FALSE	FALSE	FALSE	FALSE
YDR108W	1	-1	1	NA	2.58496	2.32193	FALSE	FALSE	FALSE	FALSE	FALSE	FALSE
YDR109C	0.222392	-0.321928	-1.73697	-2.32193	-2	-0.736966	FALSE	FALSE	FALSE	FALSE	FALSE	FALSE
YDR110W	4.29768	2	4.29768	3.80735	2.70895	3.24793	FALSE	FALSE	FALSE	FALSE	FALSE	FALSE
YDR111C	-0.847997	0	-0.917538	-0.807355	0.459432	1.1375	FALSE	FALSE	FALSE	FALSE	FALSE	FALSE
YDR113C	-0.389947	-1.39232	-0.452512	-1.152	-0.628031	-0.830075	TRUE	FALSE	FALSE	FALSE	TRUE	FALSE
YDR114C	NA	NA	NA	NA	NA	0	FALSE	FALSE	FALSE	FALSE	FALSE	FALSE
YDR115W	1.46713	1.65896	2.25376	1	1.58496	1.65992	FALSE	FALSE	TRUE	FALSE	TRUE	TRUE
YDR116C	0.436099	1.34104	0.36257	0.14439	0.308122	0.485427	TRUE	FALSE	TRUE	FALSE	TRUE	TRUE
YDR117C	1.37851	0.29956	0.289507	-0.192645	1.14886	1.83007	FALSE	FALSE	FALSE	FALSE	TRUE	FALSE
YDR118W	2	2	2.16993	NA	3.16993	NA	FALSE	FALSE	FALSE	FALSE	FALSE	FALSE
YDR119W	-0.142019	-1	-1.28011	-0.547488	-0.0962153	-0.160465	TRUE	FALSE	FALSE	FALSE	TRUE	FALSE
YDR119W-A	0	0.584963	NA	0.263034	1	-2.11548	FALSE	FALSE	FALSE	FALSE	FALSE	FALSE
YDR120C	NA	NA	-3.66297	NA	NA	NA	FALSE	FALSE	FALSE	FALSE	FALSE	FALSE
YDR121W	0.716207	-0.736966	0.0703893	0	0.866733	-0.0931094	FALSE	FALSE	TRUE	FALSE	FALSE	FALSE
YDR122W	-0.518131	-0.288431	-0.790281	-0.0690416	-0.341037	-0.228941	TRUE	TRUE	TRUE	TRUE	TRUE	TRUE
YDR123C	-0.72792	-1	-1.24793	-1	-0.83399	-2.1375	TRUE	FALSE	TRUE	FALSE	TRUE	FALSE
YDR124W	-1	-0.0931094	-0.473931	-0.807355	-2.14296	-2.078	TRUE	FALSE	FALSE	FALSE	FALSE	FALSE
YDR125C	0.192645	0.584963	-1.80735	NA	0	0	FALSE	FALSE	FALSE	FALSE	FALSE	FALSE
YDR126W	1.58496	-1.58496	-1.58496	NA	0	-2	FALSE	FALSE	FALSE	FALSE	FALSE	FALSE
YDR127W	1.48543	1.87447	-0.415037	0.584963	-0.415037	1.32193	FALSE	FALSE	FALSE	FALSE	FALSE	FALSE
YDR128W	0.473931	1.848	0.784271	0.415037	1.39855	0.736966	FALSE	FALSE	FALSE	FALSE	FALSE	FALSE
YDR129C	-1.09954	-0.869939	-0.567041	-0.965235	0.0412227	-1.09433	TRUE	TRUE	TRUE	TRUE	TRUE	TRUE
YDR129C	NA	NA	NA	NA	NA	NA	FALSE	FALSE	FALSE	FALSE	FALSE	FALSE
YDR130C	1.08746	-1	1.29546	0.263034	0.906891	0.160465	FALSE	FALSE	FALSE	FALSE	FALSE	FALSE
YDR131C	NA	-1.32193	-1.58496	NA	1	-1.32193	FALSE	FALSE	FALSE	FALSE	FALSE	FALSE
YDR132C	NA	NA	1.58496	NA	0.736966	NA	FALSE	FALSE	FALSE	FALSE	FALSE	FALSE
YDR135C	0.584963	NA	NA	NA	2.32193	2.16993	FALSE	FALSE	FALSE	FALSE	FALSE	FALSE
YDR137W	-1	-3.16993	-1	NA	-0.289507	-2.16993	FALSE	FALSE	FALSE	FALSE	FALSE	FALSE
YDR138W	1.73697	1.58496	1.58496	0	1.67807	1.26303	FALSE	FALSE	FALSE	FALSE	FALSE	FALSE
YDR139C	-0.427749	-1.09761	-0.316608	-0.0962153	0.116024	-0.248679	TRUE	TRUE	TRUE	TRUE	TRUE	TRUE
YDR139C	NA	NA	NA	NA	NA	NA	FALSE	FALSE	FALSE	FALSE	FALSE	FALSE
YDR140W	NA	NA	-2.80735	-2.16993	-4.11548	-2.75489	FALSE	FALSE	FALSE	FALSE	FALSE	FALSE
YDR141C	2	NA	2.43296	NA	2.27302	2.64386	FALSE	FALSE	FALSE	FALSE	FALSE	FALSE
YDR142C	-1.58496	-3	-0.584963	-1	NA	0.584963	FALSE	FALSE	FALSE	FALSE	FALSE	FALSE
YDR143C	-0.321928	2.58496	2.58496	-0.584963	0.584963	-1.22239	FALSE	FALSE	FALSE	FALSE	FALSE	FALSE
YDR144C	0.378512	-0.736966	-0.628031	2	0.485427	-0.736966	FALSE	FALSE	FALSE	FALSE	FALSE	FALSE
YDR145W	-0.415037	0.125531	-0.616671	0.63743	0.807355	-0.387023	FALSE	FALSE	FALSE	FALSE	FALSE	FALSE
YDR146C	-0.263034	2	1.80735	0	0	0.807355	FALSE	FALSE	FALSE	FALSE	FALSE	FALSE
YDR147W	0.241008	1	1.70044	-0.169925	0.0703893	-0.192645	FALSE	FALSE	FALSE	FALSE	TRUE	FALSE
YDR148C	0	-0.343954	-0.241008	-1.36923	-0.584963	0.0824622	TRUE	TRUE	TRUE	FALSE	TRUE	TRUE
YDR150W	1.47805	0.736966	1.83007	0	1.96347	0.169925	FALSE	FALSE	FALSE	FALSE	FALSE	FALSE
YDR151C	-2.73697	-0.63743	-1.66297	-2	-0.862496	-1.58496	FALSE	FALSE	FALSE	FALSE	FALSE	FALSE
YDR152W	0.205584	0.252766	1	0.338802	0.804276	0.249028	TRUE	TRUE	TRUE	TRUE	TRUE	TRUE
YDR153C	0.706269	0.436099	0.222392	0.830075	-0.632268	0.392317	FALSE	FALSE	FALSE	FALSE	TRUE	FALSE
YDR155C	-0.226029	-0.8895	-0.197165	-0.460417	-0.00508888	-0.23376	TRUE	TRUE	TRUE	TRUE	TRUE	TRUE
YDR156W	3.20266	2.77557	2.95551	3.07682	2.87843	2.7885	TRUE	TRUE	TRUE	TRUE	TRUE	TRUE
YDR158W	-0.341037	0.241008	0	-1.078	0.263034	0.337035	FALSE	FALSE	TRUE	FALSE	TRUE	FALSE
YDR159W	0.807355	-0.736966	-1.87447	NA	0	-3.32193	FALSE	FALSE	FALSE	FALSE	FALSE	FALSE
YDR160W	0.736966	1.37851	NA	1.58496	2.32193	0.678072	FALSE	FALSE	FALSE	FALSE	FALSE	FALSE
YDR161W	1.9386	1.80735	2.6893	2.45943	2.82889	2.24101	TRUE	FALSE	TRUE	FALSE	FALSE	FALSE
YDR162C	-1.48543	-1.26303	-1.61667	-1.48543	-1.22882	-1	TRUE	FALSE	FALSE	FALSE	TRUE	FALSE
YDR163W	0.537657	-0.169925	0.25634	1.5025	0.954196	0.688056	TRUE	FALSE	TRUE	FALSE	TRUE	FALSE
YDR164C	2.05063	4.12928	1.62149	2.9386	3.08746	2.2854	FALSE	FALSE	FALSE	FALSE	FALSE	FALSE
YDR165W	1.28688	2.66297	1.28011	1.80735	1.9102	0.584963	TRUE	FALSE	TRUE	FALSE	TRUE	TRUE
YDR166C	-0.584963	-0.415037	-0.736966	0	0.415037	NA	FALSE	FALSE	FALSE	FALSE	FALSE	FALSE
YDR167W	-0.263034	-0.881356	0.197939	0.415037	0.0494687	-0.427421	TRUE	FALSE	TRUE	FALSE	TRUE	TRUE
YDR168W	-1.05889	-2.32193	0	-0.874469	-1.06413	-1.44746	FALSE	FALSE	TRUE	FALSE	TRUE	FALSE
YDR169C	-1.22239	-1.24793	-0.719892	-2.32193	-1.36257	-1.54749	FALSE	FALSE	FALSE	FALSE	FALSE	FALSE
YDR169C-A	0	NA	NA	NA	NA	NA	FALSE	FALSE	FALSE	FALSE	FALSE	FALSE
YDR170C	0.0931094	0.192645	-0.415037	0.137504	-0.494765	-0.0780025	TRUE	TRUE	FALSE	FALSE	TRUE	FALSE
YDR171W	0.68105	-0.162638	0.619314	-0.465435	0.594645	-0.20213	TRUE	TRUE	TRUE	TRUE	TRUE	TRUE
YDR172W	0.652981	0.442005	0.479168	0.271302	0.189156	0.726239	TRUE	TRUE	TRUE	TRUE	TRUE	TRUE
YDR173C	-0.736966	-0.736966	2	0.485427	-0.321928	0	FALSE	FALSE	FALSE	FALSE	FALSE	FALSE
YDR174W	1	-0.106915	1.8365	1.24793	2.02554	0.678072	FALSE	FALSE	FALSE	FALSE	FALSE	FALSE
YDR175C	-0.36257	-0.387023	0.736966	-0.485427	-0.440573	0.214125	TRUE	FALSE	FALSE	FALSE	TRUE	TRUE
YDR176W	1.32193	1.16046	2.3599	1.19265	1.67807	1.69188	TRUE	FALSE	FALSE	FALSE	TRUE	FALSE
YDR177W	-0.827163	-1.41895	-1.30485	-1.82443	-1.07039	-1.38042	TRUE	TRUE	TRUE	TRUE	TRUE	TRUE
YDR178W	-2.18322	-2.56294	-1.64599	-2.66903	-1.75489	-2.00554	TRUE	TRUE	TRUE	TRUE	TRUE	TRUE
YDR179C	-0.415037	0	0.643856	1.58496	0.304855	1	FALSE	FALSE	FALSE	FALSE	FALSE	FALSE
YDR179W-A	-1	NA	0.485427	1	-0.736966	-1	FALSE	FALSE	FALSE	FALSE	FALSE	FALSE
YDR180W	-0.514573	-2	0.758992	2	0.667425	1.58496	FALSE	FALSE	FALSE	FALSE	FALSE	FALSE
YDR181C	0.415037	-1	-0.125531	-0.736966	-0.530515	-0.70044	FALSE	FALSE	FALSE	FALSE	FALSE	FALSE
YDR182W	1.43296	0.754888	2.13614	1.848	1.39232	1.18184	TRUE	TRUE	TRUE	TRUE	TRUE	TRUE
YDR182W-A	-1	0	1	NA	NA	1	FALSE	FALSE	FALSE	FALSE	FALSE	FALSE
YDR183W	0.160465	1.32193	0.337035	1.28011	0.584963	-1.37851	FALSE	FALSE	FALSE	FALSE	FALSE	FALSE
YDR184C	-0.530515	-1.32193	0.691878	-1.58496	-0.192645	-0.222392	FALSE	FALSE	FALSE	FALSE	FALSE	FALSE
YDR185C	NA	-1.32193	-1.58496	-0.321928	-1	0	FALSE	FALSE	FALSE	FALSE	FALSE	FALSE
YDR186C	-1.51457	-1	-0.387023	-1	-1.19265	-1.1375	FALSE	FALSE	FALSE	FALSE	FALSE	FALSE
YDR188W	0.745817	0.335603	0.610053	0.647698	0.802963	0.575502	TRUE	TRUE	TRUE	TRUE	TRUE	TRUE
YDR189W	1.14296	1.42884	1.35364	0.247928	1.05311	0.909802	TRUE	FALSE	TRUE	FALSE	TRUE	TRUE
YDR190C	-0.645335	-0.847997	-0.161751	-0.485427	-0.143364	-0.736966	TRUE	FALSE	TRUE	FALSE	TRUE	TRUE
YDR191W	-0.736966	NA	-0.807355	1.58496	1.22239	NA	FALSE	FALSE	FALSE	FALSE	FALSE	FALSE
YDR192C	-0.485427	-1.41504	-1.66297	-2.80735	-2.16993	-0.847997	FALSE	FALSE	FALSE	FALSE	FALSE	FALSE
YDR194C	-1.52356	-0.63743	-1.66297	-0.621488	-0.980891	0.222392	FALSE	FALSE	TRUE	FALSE	TRUE	TRUE
YDR194W-A	NA	NA	NA	NA	NA	NA	FALSE	FALSE	FALSE	FALSE	FALSE	FALSE
YDR195W	0.652077	0	1.09954	2.58496	0.152003	1.90689	FALSE	FALSE	FALSE	FALSE	FALSE	FALSE
YDR196C	-2.56635	-1.29834	-1.27798	-1.90046	-1.24961	-1.19465	FALSE	TRUE	TRUE	FALSE	TRUE	TRUE
YDR197W	-1.32193	1.26303	0.289507	0	0.469485	0.584963	FALSE	FALSE	FALSE	FALSE	FALSE	FALSE
YDR198C	-1	0	-0.736966	-1	0.584963	-2.32193	FALSE	FALSE	FALSE	FALSE	FALSE	FALSE
YDR200C	-1.02647	-2.42146	-0.321928	-0.550197	-0.321928	-1	TRUE	TRUE	TRUE	TRUE	TRUE	TRUE
YDR201W	-1.22239	-0.263034	0.253757	-2.11548	-1.1375	-0.943416	FALSE	FALSE	TRUE	FALSE	TRUE	FALSE
YDR202C	3.15754	1.70627	3.16993	2.21205	3.32847	2.10434	FALSE	TRUE	FALSE	TRUE	TRUE	TRUE
YDR204W	-2.16993	-0.893085	-0.906891	0	0.115477	-0.63743	FALSE	FALSE	FALSE	FALSE	FALSE	FALSE
YDR205W	-1.9386	-2.32193	-2.32193	-0.169925	-1.04439	-1.43296	FALSE	FALSE	FALSE	FALSE	FALSE	FALSE
YDR206W	-2.08746	-0.584963	-1	NA	0	-0.321928	FALSE	FALSE	FALSE	FALSE	FALSE	FALSE
YDR207C	1.24793	1.41504	3.39232	2.58496	2	1.76553	FALSE	FALSE	FALSE	FALSE	FALSE	FALSE
YDR208W	-0.784271	-0.494765	-1.58496	-1.24793	-1.36923	-1.8625	FALSE	TRUE	FALSE	FALSE	FALSE	FALSE
YDR210W	3.28109	4.19265	4.96717	4.9542	4.51412	3.75489	TRUE	FALSE	TRUE	FALSE	TRUE	TRUE
YDR211W	-0.643856	0.152003	-0.263034	0.584963	0.0430687	-0.584963	FALSE	FALSE	TRUE	FALSE	TRUE	FALSE
YDR212W	-1.04731	1.09954	-1.02857	-1.19265	0.756729	-0.452512	FALSE	FALSE	TRUE	FALSE	TRUE	FALSE
YDR213W	0.0962153	0.584963	0.447459	0.459432	1.03747	0.485427	TRUE	FALSE	TRUE	FALSE	FALSE	FALSE
YDR214W	-2.5025	-2.41504	-1.26303	-0.485427	-1.63227	-0.710493	FALSE	FALSE	FALSE	FALSE	FALSE	FALSE
YDR216W	-2.07039	-1.64386	-1.68806	-1.5025	-1.06817	-1.58496	FALSE	FALSE	FALSE	FALSE	TRUE	TRUE
YDR217C	1.58496	-0.807355	0.5025	NA	1.70044	-0.736966	FALSE	FALSE	FALSE	FALSE	FALSE	FALSE
YDR218C	NA	NA	NA	NA	NA	NA	FALSE	FALSE	FALSE	FALSE	FALSE	FALSE
YDR219C	1.73697	-0.263034	2.45943	-1	0.321928	0.514573	FALSE	FALSE	FALSE	FALSE	FALSE	FALSE
YDR221W	0	-1.45943	-1.5025	0	-0.830075	-1	FALSE	FALSE	FALSE	FALSE	FALSE	FALSE
YDR222W	0.0614005	0.36257	2.39232	-1.58496	0.906891	2.08746	TRUE	FALSE	FALSE	FALSE	FALSE	FALSE
YDR223W	-0.115477	-1	0.847997	1.16993	1.41504	-1.22239	FALSE	FALSE	FALSE	FALSE	FALSE	FALSE
YDR224C	0.377781	-0.00773565	0.473931	-0.194816	0.69984	0.0958158	TRUE	TRUE	TRUE	TRUE	TRUE	TRUE
YDR225W	-1.38606	-1.38143	-1.53152	-1.02857	-1.45588	-0.807355	TRUE	TRUE	TRUE	TRUE	TRUE	TRUE
YDR226W	1.21681	0.530515	1.06054	1.58496	0.854802	0.90182	TRUE	TRUE	TRUE	FALSE	TRUE	TRUE
YDR227W	0.459432	0.819428	0.0614005	1.58496	-0.552541	-0.0565835	TRUE	FALSE	TRUE	FALSE	FALSE	TRUE
YDR228C	0.321928	2	1.41504	1	0.415037	1.11548	FALSE	FALSE	FALSE	FALSE	FALSE	FALSE
YDR229W	0.549339	0.98457	0.295456	1.23133	0.966053	0.984233	TRUE	TRUE	TRUE	TRUE	TRUE	TRUE
YDR231C	-1.51457	-1.03562	0.569366	0	0.0931094	-0.257158	FALSE	TRUE	TRUE	TRUE	TRUE	TRUE
YDR232W	-0.017702	0.518467	0.854149	0.630766	0.61471	0.564785	TRUE	TRUE	TRUE	TRUE	TRUE	TRUE
YDR233C	-1.78759	-1.52725	-1.10309	-1.51457	-1.2854	-1.43812	TRUE	FALSE	TRUE	FALSE	TRUE	TRUE
YDR234W	0.192645	-3.32193	-0.758992	-1	-1.09311	NA	FALSE	FALSE	FALSE	FALSE	FALSE	FALSE
YDR235W	-0.289507	0.678072	-0.415037	1.26303	-0.280108	0	FALSE	FALSE	FALSE	FALSE	FALSE	FALSE
YDR236C	2.08746	2	1.89308	3.80735	3.27302	1.8365	FALSE	FALSE	FALSE	FALSE	FALSE	FALSE
YDR237W	0.893085	1.32193	0.514573	0.736966	0.415037	-0.540568	FALSE	FALSE	FALSE	FALSE	FALSE	FALSE
YDR238C	1.39232	2.08746	1.22239	1	1.27302	0.36257	FALSE	FALSE	FALSE	FALSE	FALSE	FALSE
YDR239C	1.32193	1.48543	0.241008	0.415037	1.65208	0.192645	FALSE	FALSE	FALSE	FALSE	FALSE	FALSE
YDR240C	0.678072	0.584963	0.652077	0	1.39232	1.22239	FALSE	FALSE	FALSE	FALSE	FALSE	FALSE
YDR242W	-0.76184	-0.289507	-0.432959	-0.152003	-0.63743	-1	TRUE	FALSE	TRUE	FALSE	TRUE	FALSE
YDR243C	1	NA	1	-0.415037	0.584963	3.16993	FALSE	FALSE	FALSE	FALSE	FALSE	FALSE
YDR244W	-0.628031	-0.330149	0.199309	-0.415037	-0.0339473	-0.72792	TRUE	TRUE	TRUE	TRUE	TRUE	TRUE
YDR245W	-0.847997	1	-0.137504	NA	0.777608	0.222392	FALSE	FALSE	FALSE	FALSE	FALSE	FALSE
YDR246W	-1.16993	-0.793549	-0.750022	-1.44746	-1.78427	-1.70044	FALSE	FALSE	TRUE	FALSE	FALSE	FALSE
YDR246W-A	1.58496	NA	0	-1.58496	NA	0.263034	FALSE	FALSE	FALSE	FALSE	FALSE	FALSE
YDR247W	-0.0339473	-0.550197	-0.228269	0.169925	0.251539	0.0687128	TRUE	TRUE	TRUE	TRUE	TRUE	TRUE
YDR248C	-0.415037	-1.07039	-0.893085	-0.736966	-0.106915	0.115477	FALSE	FALSE	FALSE	FALSE	FALSE	FALSE
YDR249C	-1.32193	-0.263034	-0.807355	NA	-0.874469	-2.45943	FALSE	FALSE	FALSE	FALSE	FALSE	FALSE
YDR251W	-0.540568	0.247928	0.169925	-0.378512	-0.530515	-0.473931	FALSE	FALSE	FALSE	FALSE	FALSE	FALSE
YDR252W	-3.70044	NA	-3.16993	0	NA	NA	FALSE	FALSE	FALSE	FALSE	FALSE	FALSE
YDR253C	-0.176878	-0.917538	-0.415037	NA	-0.304855	0.415037	TRUE	FALSE	FALSE	FALSE	FALSE	FALSE
YDR254W	NA	NA	-1.58496	0	1	0	FALSE	FALSE	FALSE	FALSE	FALSE	FALSE
YDR255C	1.73697	2.0163	2.48543	2.10692	2.58496	3.25873	FALSE	TRUE	FALSE	FALSE	FALSE	FALSE
YDR256C	NA	NA	NA	NA	NA	NA	FALSE	FALSE	FALSE	FALSE	FALSE	FALSE
YDR257C	-0.169925	-1.41504	-2.11548	-1.80735	-1.80735	-0.485427	FALSE	FALSE	FALSE	FALSE	FALSE	FALSE
YDR258C	0.103093	1.04064	1.49185	1.26303	1.44478	0.744743	TRUE	TRUE	TRUE	TRUE	TRUE	TRUE
YDR259C	1.70044	0.925999	0	0.378512	1.16993	1.078	FALSE	FALSE	FALSE	FALSE	FALSE	FALSE
YDR260C	1.05658	1.5025	2.25634	1.58496	2.36405	2.36257	TRUE	FALSE	FALSE	FALSE	TRUE	FALSE
YDR261C	0.547488	0.736966	-0.115477	1.32193	2.26303	2.58496	FALSE	FALSE	FALSE	FALSE	FALSE	FALSE
YDR262W	-2.37851	-3.58496	-3.02975	-2.66985	-2.57075	-2.42146	FALSE	FALSE	FALSE	FALSE	FALSE	FALSE
YDR263C	-2.80735	0.584963	-3.16993	NA	-0.222392	-1.58496	FALSE	FALSE	FALSE	FALSE	FALSE	FALSE
YDR264C	-0.612977	0.152003	0.263034	0.925999	0.641546	0.392317	FALSE	FALSE	TRUE	FALSE	TRUE	FALSE
YDR265W	1.89812	1.69188	1.50901	1.41504	1.0614	0.847997	FALSE	FALSE	FALSE	FALSE	TRUE	TRUE
YDR266C	0.112894	0.91427	0.525461	0.36257	0.176157	0.146841	TRUE	TRUE	TRUE	TRUE	TRUE	TRUE
YDR267C	1.80735	0	0	NA	0.736966	0	FALSE	FALSE	FALSE	FALSE	FALSE	FALSE
YDR268W	-1.67807	-1.41504	-1.07039	-0.263034	-0.321928	-0.514573	FALSE	FALSE	FALSE	FALSE	FALSE	FALSE
YDR270W	-0.415037	-0.874469	1.22239	-0.584963	-0.415037	-1.32193	FALSE	FALSE	FALSE	FALSE	FALSE	FALSE
YDR272W	-0.442518	-0.963474	0.349584	-0.40439	0.0198996	-0.29956	TRUE	TRUE	TRUE	TRUE	TRUE	TRUE
YDR273W	0.906891	0.50696	2.63227	1.58496	1.32193	0.612977	FALSE	FALSE	FALSE	FALSE	FALSE	FALSE
YDR275W	0.241008	0.263034	-0.206451	-0.807355	-0.125531	1.28011	FALSE	FALSE	FALSE	FALSE	TRUE	FALSE
YDR276C	-0.554589	-0.979822	-0.0602605	-0.83715	-0.368284	-0.658129	TRUE	TRUE	TRUE	TRUE	TRUE	TRUE
YDR277C	-0.263034	-1.16993	-2.58496	-2.45943	-0.222392	-2.26303	FALSE	FALSE	FALSE	FALSE	FALSE	FALSE
YDR279W	-0.547488	0.678072	0.387023	-0.192645	-0.943416	0	FALSE	FALSE	FALSE	FALSE	FALSE	FALSE
YDR280W	-0.304855	0.36257	-0.192645	0.241008	-0.879706	-0.241008	FALSE	FALSE	TRUE	FALSE	TRUE	FALSE
YDR281C	0.552541	-1.58496	0.36257	-1	0.652077	NA	FALSE	FALSE	FALSE	FALSE	FALSE	FALSE
YDR282C	-1.73697	NA	-2.73697	-2	-2.41504	-2.45943	FALSE	FALSE	FALSE	FALSE	FALSE	FALSE
YDR283C	-1.38466	-0.485427	-1.08746	-1.28951	-0.91427	-1.55639	FALSE	FALSE	TRUE	FALSE	TRUE	FALSE
YDR284C	1.37851	-1.49476	0.584963	0.289507	-0.0780025	0	FALSE	FALSE	FALSE	FALSE	FALSE	TRUE
YDR285W	0.415037	0	NA	-0.584963	-1.58496	2.80735	FALSE	FALSE	FALSE	FALSE	FALSE	FALSE
YDR286C	NA	-1.58496	-0.736966	-0.415037	-2.32193	-1.87447	FALSE	FALSE	FALSE	FALSE	FALSE	FALSE
YDR287W	0.63743	0.152003	1.51457	-0.347923	0.561879	-0.214125	FALSE	FALSE	FALSE	FALSE	TRUE	TRUE
YDR288W	-0.704544	0.678072	1.19265	1.03747	1.11548	1.1375	TRUE	TRUE	TRUE	FALSE	TRUE	TRUE
YDR289C	1.22239	-0.70044	2.80735	-0.415037	2.51457	1.58496	FALSE	FALSE	FALSE	FALSE	FALSE	FALSE
YDR291W	-0.378512	-0.222392	-0.807355	-0.415037	-0.131245	-0.716207	FALSE	FALSE	FALSE	FALSE	TRUE	FALSE
YDR292C	-0.106915	0.63743	0.788496	0	1.05445	0.667425	FALSE	FALSE	FALSE	FALSE	FALSE	FALSE
YDR293C	-1.70044	-1.77389	-1.61005	-1.74595	-2.01954	-2.06457	TRUE	TRUE	TRUE	TRUE	TRUE	TRUE
YDR294C	0.353637	-0.263034	0.616671	-0.152003	0.0544478	0.222392	FALSE	TRUE	FALSE	FALSE	TRUE	FALSE
YDR295C	0.252766	1.078	0.0310269	0.4975	0.818162	0.355095	TRUE	TRUE	TRUE	FALSE	TRUE	TRUE
YDR296W	2.3112	2.35755	2.71839	2.76553	2.9023	1.85626	TRUE	FALSE	TRUE	FALSE	TRUE	TRUE
YDR297W	2.4021	2.70044	2.5502	2.32193	1.80735	2.24793	FALSE	FALSE	FALSE	FALSE	FALSE	FALSE
YDR298C	0.893085	0.169925	0.180572	0.530515	1.4021	-0.247928	FALSE	FALSE	FALSE	FALSE	FALSE	FALSE
YDR299W	1.32716	2.90689	3.03342	3.80735	2.14568	1.9386	TRUE	FALSE	FALSE	FALSE	TRUE	FALSE
YDR300C	0.736966	0.347923	0.750022	1.24793	1.02466	1.34395	FALSE	FALSE	TRUE	FALSE	TRUE	FALSE
YDR301W	-0.584963	-0.459432	-0.222392	-2	-0.125531	-0.917538	FALSE	FALSE	FALSE	FALSE	FALSE	FALSE
YDR302W	2.23704	0.906891	1.29546	1.16993	2.03242	1.28011	FALSE	FALSE	FALSE	FALSE	FALSE	FALSE
YDR303C	-0.0544478	-0.736966	-0.685891	0.514573	-0.815575	0.523562	TRUE	FALSE	TRUE	FALSE	TRUE	FALSE
YDR304C	0.247928	-0.285402	-0.244419	0.710493	0.468387	0.610053	TRUE	TRUE	TRUE	TRUE	TRUE	TRUE
YDR305C	-2.52356	-0.716207	-1.78427	-3.5025	-3.08746	-2.36257	FALSE	FALSE	FALSE	FALSE	FALSE	FALSE
YDR305C	NA	NA	NA	NA	NA	NA	FALSE	FALSE	FALSE	FALSE	FALSE	FALSE
YDR306C	-0.473931	0.103093	-0.36257	-0.777608	0.938599	0.133267	FALSE	TRUE	FALSE	FALSE	FALSE	TRUE
YDR307W	1.58496	1.73697	1.70044	0.736966	2.16993	0.906891	FALSE	FALSE	FALSE	FALSE	FALSE	FALSE
YDR308C	0.129283	-0.0995357	0.703607	0.547488	0.70044	-0.601451	TRUE	FALSE	TRUE	FALSE	TRUE	TRUE
YDR309C	-0.440573	-0.263034	0	0.584963	0	-0.115477	FALSE	FALSE	TRUE	FALSE	TRUE	FALSE
YDR310C	-1.43296	-1.1375	-0.530515	1.58496	-1.58496	-0.584963	FALSE	FALSE	FALSE	FALSE	FALSE	FALSE
YDR311W	0.938599	2	2.45943	0.777608	2.07039	0.938599	FALSE	FALSE	FALSE	FALSE	FALSE	FALSE
YDR312W	1.25376	0.192645	0.296982	0.222392	1.22882	0.378512	TRUE	FALSE	TRUE	FALSE	TRUE	FALSE
YDR313C	-1.54749	-2.32193	-1.80735	-1.32193	-1.152	-1.80735	FALSE	FALSE	FALSE	FALSE	FALSE	FALSE
YDR314C	-1.80735	-1	-1	1	-0.222392	-0.0931094	FALSE	FALSE	FALSE	FALSE	FALSE	FALSE
YDR315C	NA	-3.5025	-3.04439	-4.08746	-5.64386	-3.8413	FALSE	FALSE	FALSE	FALSE	FALSE	FALSE
YDR316W	0.189825	0.357552	0.0168738	0.36257	0.18133	0.0274807	TRUE	TRUE	TRUE	TRUE	TRUE	TRUE
YDR317W	-1.58496	1	0.222392	1.58496	1	-2.32193	FALSE	FALSE	FALSE	FALSE	FALSE	FALSE
YDR318W	-2.58496	-1.34395	-0.83399	-2.1375	-0.415037	-1.34792	FALSE	FALSE	TRUE	FALSE	TRUE	FALSE
YDR318W	NA	NA	NA	NA	NA	NA	FALSE	FALSE	FALSE	FALSE	FALSE	FALSE
YDR319C	-0.137504	1.1375	0.807355	0	0.169925	0.341037	FALSE	FALSE	FALSE	FALSE	FALSE	FALSE
YDR320C	-0.917538	-1	0.514573	-0.436099	-0.440573	-0.112475	FALSE	FALSE	TRUE	FALSE	TRUE	TRUE
YDR320C-A	0.514573	0.309328	0.407658	-0.389947	0.669027	-0.239188	TRUE	TRUE	TRUE	TRUE	TRUE	TRUE
YDR321W	0.915111	0.584963	0.821663	1.16993	0.895663	1.2854	TRUE	FALSE	TRUE	FALSE	TRUE	FALSE
YDR322W	-0.70044	-0.652077	-0.040642	-1.37851	-0.121991	-1.36257	FALSE	FALSE	TRUE	FALSE	TRUE	FALSE
YDR322C-A	0.0506261	-0.132755	0.628031	0.0443941	0.432959	-0.153474	TRUE	TRUE	TRUE	TRUE	TRUE	TRUE
YDR323C	-0.152003	0.736966	0.152003	0	0.447459	1.26303	FALSE	FALSE	FALSE	FALSE	FALSE	FALSE
YDR324C	NA	NA	NA	NA	NA	0	FALSE	FALSE	FALSE	FALSE	FALSE	FALSE
YDR325W	-1.58496	0.584963	0.169925	2.32193	0.736966	0.415037	FALSE	FALSE	FALSE	FALSE	FALSE	FALSE
YDR326C	-0.122857	-0.565597	-0.671377	-0.459432	-1	-0.293731	TRUE	TRUE	TRUE	FALSE	TRUE	TRUE
YDR328C	0.0715533	-0.525091	0.0389941	-0.040642	-0.291463	0.0210616	TRUE	TRUE	TRUE	TRUE	TRUE	TRUE
YDR329C	0	0	-0.459432	-0.321928	-1.08746	-2	FALSE	FALSE	FALSE	FALSE	FALSE	FALSE
YDR330W	-0.929611	-0.93587	-0.447459	-1.58496	0.0565835	-0.537657	TRUE	TRUE	TRUE	FALSE	TRUE	TRUE
YDR331W	0.777608	1.37851	3.80735	0.847997	3.04439	2.24793	FALSE	FALSE	FALSE	FALSE	FALSE	FALSE
YDR332W	3.80735	2.70044	1.848	NA	2.16993	2.90689	FALSE	FALSE	FALSE	FALSE	FALSE	FALSE
YDR333C	-0.289507	-2.32193	-0.0740006	-0.584963	-0.211504	-0.874469	FALSE	FALSE	FALSE	FALSE	FALSE	FALSE
YDR334W	-2.16993	-0.688056	-1.52356	-1	-2.20163	-1.24101	FALSE	FALSE	FALSE	FALSE	FALSE	FALSE
YDR335W	-0.0995357	0.559427	-0.125531	-0.0824622	-0.825971	0	TRUE	FALSE	TRUE	FALSE	TRUE	TRUE
YDR336W	-1.58496	-1.16993	-0.263034	-0.736966	-1	-1.26303	FALSE	FALSE	FALSE	FALSE	FALSE	FALSE
YDR337W	0.347923	0.552541	-0.490986	0.36257	0.2824	0.0721498	TRUE	FALSE	TRUE	FALSE	TRUE	TRUE
YDR338C	-1.32193	1	NA	1.58496	0.321928	-1.16993	FALSE	FALSE	FALSE	FALSE	FALSE	FALSE
YDR339C	-0.783189	-1.848	-0.522421	0.131245	-0.50696	-0.459432	TRUE	FALSE	TRUE	TRUE	TRUE	TRUE
YDR341C	-1.55459	-1	-0.95109	-0.710493	0.0347654	-0.819428	FALSE	FALSE	FALSE	FALSE	TRUE	FALSE
YDR342C	-0.514573	-0.192645	-0.491853	-0.125531	-0.478047	0	FALSE	TRUE	TRUE	TRUE	TRUE	TRUE
YDR343C	-1.5025	-0.280108	-0.403356	0.0458037	0.180572	-0.0634254	FALSE	TRUE	TRUE	TRUE	TRUE	TRUE
YDR345C	0.219566	-0.514573	0.81876	0.736966	0.691878	-0.478047	TRUE	FALSE	TRUE	TRUE	TRUE	TRUE
YDR346C	-1.54749	-0.807355	-0.796467	0	-1.18057	-2.08746	FALSE	FALSE	FALSE	FALSE	FALSE	FALSE
YDR347W	1.58496	1.58496	2.85798	1.45943	0.678072	1.58496	FALSE	FALSE	FALSE	FALSE	FALSE	FALSE
YDR348C	0.0671142	-0.283793	0.5025	-0.321928	-0.0671142	-0.415037	TRUE	TRUE	TRUE	FALSE	TRUE	TRUE
YDR349C	-0.36257	-0.415037	-0.736966	0	-1	-0.415037	FALSE	FALSE	FALSE	FALSE	FALSE	FALSE
YDR350C	1.22239	1.16993	0.347923	0	0.874469	3.16993	FALSE	FALSE	FALSE	FALSE	FALSE	FALSE
YDR351W	-0.283793	-0.652077	0	-1.41504	-0.241008	-0.807355	TRUE	FALSE	FALSE	FALSE	TRUE	FALSE
YDR352W	-0.289507	1.32193	-0.415037	-1	0.736966	-0.321928	FALSE	FALSE	FALSE	FALSE	FALSE	FALSE
YDR353W	0.294061	0.773724	0.915608	1.9349	0.857981	1.19535	TRUE	TRUE	TRUE	TRUE	TRUE	TRUE
YDR354W	0.192645	-1	0.628031	-0.584963	1.22239	0.736966	FALSE	FALSE	FALSE	FALSE	FALSE	FALSE
YDR356W	-0.241008	0.436099	1.074	0.652077	0.608809	0.275634	TRUE	FALSE	FALSE	FALSE	TRUE	FALSE
YDR357C	-1.89308	-1.26303	-1.26303	-1	-0.932886	-0.415037	FALSE	FALSE	FALSE	FALSE	FALSE	FALSE
YDR358W	0.900464	-0.316027	1.85415	0.216811	1.76939	0.695994	FALSE	TRUE	FALSE	TRUE	TRUE	TRUE
YDR359C	-1.27302	-0.469485	-0.530515	-0.547488	-1.35364	-2.11548	FALSE	FALSE	FALSE	FALSE	FALSE	FALSE
YDR361C	-0.578536	-0.719892	-0.119053	-1.19265	-0.691878	-0.714598	TRUE	FALSE	TRUE	FALSE	TRUE	TRUE
YDR362C	-1.28951	-0.777608	-0.807355	-1.32193	-0.830075	-1.87447	FALSE	FALSE	FALSE	FALSE	FALSE	FALSE
YDR363W	-1.51457	-0.584963	-1.19265	-0.584963	-1.41504	-1.32193	FALSE	FALSE	FALSE	FALSE	FALSE	FALSE
YDR363W-A	-0.876618	-0.877143	-0.595851	-0.490326	-1.18866	-0.667425	TRUE	TRUE	TRUE	TRUE	TRUE	TRUE
YDR364C	-0.378512	-0.736966	-0.137504	NA	1.41504	1.32193	FALSE	FALSE	FALSE	FALSE	FALSE	FALSE
YDR365C	-0.249978	-0.222392	-0.571906	-0.459432	0.0524674	-0.163499	TRUE	FALSE	TRUE	FALSE	TRUE	TRUE
YDR366C	NA	0	NA	NA	NA	NA	FALSE	FALSE	FALSE	FALSE	FALSE	FALSE
YDR367W	0.263034	0	1.58496	-1.32193	2.58496	1	FALSE	FALSE	FALSE	FALSE	FALSE	FALSE
YDR367W	NA	NA	NA	NA	NA	NA	FALSE	FALSE	FALSE	FALSE	FALSE	FALSE
YDR368W	1.20163	1.58496	2.66297	2	0.222392	0.283793	FALSE	FALSE	FALSE	FALSE	FALSE	TRUE
YDR369C	1.58496	1	1.22239	0	0.222392	2.11548	FALSE	FALSE	FALSE	FALSE	FALSE	FALSE
YDR370C	NA	NA	-3.64386	NA	-5.04439	-4.32193	FALSE	FALSE	FALSE	FALSE	FALSE	FALSE
YDR371W	-0.584963	0	0.415037	NA	1	-1.32193	FALSE	FALSE	FALSE	FALSE	FALSE	FALSE
YDR372C	-1.72379	-0.977974	-1.02697	-0.807355	-1.07595	-0.830075	TRUE	TRUE	TRUE	TRUE	TRUE	TRUE
YDR373W	-0.347923	0.192645	0.459432	0.807355	0.29956	-0.152003	FALSE	FALSE	FALSE	FALSE	FALSE	FALSE
YDR374C	NA	NA	NA	NA	NA	NA	FALSE	FALSE	FALSE	FALSE	FALSE	FALSE
YDR374W-A	-0.485427	-0.222392	0.152003	-1	-0.263034	-0.662965	FALSE	FALSE	FALSE	FALSE	FALSE	FALSE
YDR375C	2.16993	0.736966	1.078	-1.58496	0.63743	1.22239	FALSE	FALSE	FALSE	FALSE	FALSE	FALSE
YDR376W	-0.678072	-1.58496	-0.321928	0.584963	-1.32193	-0.222392	FALSE	FALSE	FALSE	FALSE	FALSE	FALSE
YDR377W	0.462343	0.328054	0.696608	1.11103	0.375509	0.330645	TRUE	TRUE	TRUE	TRUE	TRUE	TRUE
YDR378C	0.185556	0.0473057	1.06012	0.63743	0.304855	0.647698	TRUE	TRUE	TRUE	FALSE	TRUE	TRUE
YDR379W	-1.41504	0.678072	-2	-2	-0.415037	0	FALSE	FALSE	FALSE	FALSE	FALSE	FALSE
YDR379C-A	1.58496	0.266515	1.09954	0.375509	0.427421	0.844722	FALSE	TRUE	TRUE	TRUE	TRUE	TRUE
YDR380W	-1.32193	-0.847997	-0.29956	-0.440573	0.719892	-0.825971	FALSE	FALSE	FALSE	FALSE	FALSE	TRUE
YDR381W	-2.96875	-3.53842	-3.17608	-2.71786	-2.8314	-2.71823	TRUE	TRUE	TRUE	FALSE	TRUE	TRUE
YDR381W	NA	NA	NA	NA	NA	NA	FALSE	FALSE	FALSE	FALSE	FALSE	FALSE
YDR381C-A	-3.20163	-3.75489	-5.61471	-4.75489	NA	-4.9542	FALSE	FALSE	FALSE	FALSE	FALSE	FALSE
YDR381C-A	NA	NA	NA	NA	NA	NA	FALSE	FALSE	FALSE	FALSE	FALSE	FALSE
YDR382W	-0.954196	-1.15673	-0.85495	-0.493815	-0.7795	-0.363812	TRUE	TRUE	TRUE	TRUE	TRUE	TRUE
YDR383C	-0.0824622	0.906891	-1.22239	0.263034	0.710493	-0.152003	FALSE	FALSE	FALSE	FALSE	FALSE	FALSE
YDR384C	-0.536053	-0.678072	0.695145	-0.415037	0.133267	-1.71621	TRUE	FALSE	TRUE	FALSE	TRUE	FALSE
YDR385W	-0.681318	-0.139403	-0.38247	-0.0310269	-0.532111	0.304006	TRUE	TRUE	TRUE	TRUE	TRUE	TRUE
YDR386W	-0.736966	-3.39232	-1.07039	-1.22239	-0.556393	0.206451	FALSE	FALSE	FALSE	FALSE	FALSE	FALSE
YDR387C	2.80735	0.807355	2.73697	3.16993	1.73697	NA	FALSE	FALSE	FALSE	FALSE	FALSE	FALSE
YDR388W	0.14543	-0.0944647	0.501881	0.602665	0.82397	0.267933	TRUE	TRUE	TRUE	TRUE	TRUE	TRUE
YDR389W	-0.629632	-0.920566	-0.871676	-0.788496	-0.901436	-0.257158	TRUE	TRUE	TRUE	TRUE	TRUE	TRUE
YDR390C	1.27009	0.823122	0.754888	1.87447	1.848	2.39232	FALSE	FALSE	FALSE	FALSE	FALSE	FALSE
YDR391C	-0.424498	-0.712718	-0.2824	-0.5025	0.068387	-0.17897	TRUE	TRUE	TRUE	TRUE	TRUE	TRUE
YDR392W	1.4245	1.152	1.70044	1.89308	2.5025	1.74543	FALSE	FALSE	TRUE	FALSE	FALSE	FALSE
YDR393W	2.52356	2	2.96347	1.20163	2.80735	2.20945	FALSE	FALSE	FALSE	FALSE	FALSE	FALSE
YDR394W	-0.114072	0.179448	0.0117772	0.211504	0.0300572	0.620035	TRUE	TRUE	TRUE	TRUE	TRUE	TRUE
YDR395W	-0.0874628	-1.37851	0.847997	1.58496	-0.263034	-1.16993	FALSE	FALSE	FALSE	FALSE	FALSE	FALSE
YDR397C	-0.527247	-1.54057	-0.328054	-1.34792	-0.156726	-2.39232	TRUE	FALSE	TRUE	FALSE	TRUE	FALSE
YDR397C	NA	NA	NA	NA	NA	NA	FALSE	FALSE	FALSE	FALSE	FALSE	FALSE
YDR398W	0.415037	0	1.80735	NA	0.874469	3	FALSE	FALSE	FALSE	FALSE	FALSE	FALSE
YDR399W	-0.30895	0.530515	0.125531	0.321928	-0.076962	-0.678072	TRUE	FALSE	TRUE	FALSE	TRUE	FALSE
YDR400W	2.39232	2.45943	2.64386	2	2.11548	1.45943	FALSE	FALSE	FALSE	FALSE	FALSE	FALSE
YDR402C	NA	NA	NA	NA	NA	NA	FALSE	FALSE	FALSE	FALSE	FALSE	FALSE
YDR403W	NA	NA	NA	NA	NA	NA	FALSE	FALSE	FALSE	FALSE	FALSE	FALSE
YDR404C	-1.65208	-1.19265	-1.64046	-2.53605	-0.584963	-0.874469	FALSE	FALSE	FALSE	FALSE	TRUE	TRUE
YDR405W	-0.519374	0.206451	1.06711	0.452512	0.53842	0.604071	TRUE	TRUE	TRUE	FALSE	TRUE	TRUE
YDR406W	-0.584963	-1.26024	-1.41504	-1.52725	-1.1375	-1.30117	FALSE	TRUE	FALSE	TRUE	FALSE	TRUE
YDR407C	0.514573	-0.137504	-0.874469	1.58496	0.36257	0.584963	FALSE	FALSE	FALSE	FALSE	FALSE	FALSE
YDR408C	-0.232661	-0.2824	0.736966	0.0660892	0.204358	0.340075	TRUE	TRUE	TRUE	TRUE	TRUE	TRUE
YDR409W	-1.58496	-2.80735	-2.32193	2	-0.736966	0	FALSE	FALSE	FALSE	FALSE	FALSE	FALSE
YDR410C	-1	-1.078	-1.24101	0	-1.09311	-1.08746	FALSE	FALSE	FALSE	FALSE	FALSE	FALSE
YDR411C	0.415037	0.70044	1.56704	1.85798	1.67807	0.547488	TRUE	FALSE	TRUE	FALSE	TRUE	TRUE
YDR412W	1.21299	0.415037	0.765535	-1	1.32193	1.848	TRUE	FALSE	TRUE	FALSE	TRUE	FALSE
YDR414C	0.736966	NA	2.32193	2	1.58496	1.58496	FALSE	FALSE	FALSE	FALSE	FALSE	FALSE
YDR415C	NA	0.807355	NA	0.584963	1.22239	-0.584963	FALSE	FALSE	FALSE	FALSE	FALSE	FALSE
YDR416W	-2.90689	-4.32193	-1.37851	-3.32193	-2.41504	-2.32193	FALSE	FALSE	FALSE	FALSE	FALSE	FALSE
YDR418W	0.335215	1.43463	0.329112	1.82334	0.248697	1.20183	TRUE	TRUE	TRUE	TRUE	TRUE	TRUE
YDR419W	-0.321928	1.67807	-0.0824622	-1	0.485427	-0.137504	FALSE	FALSE	FALSE	FALSE	FALSE	FALSE
YDR420W	0.662965	-0.530515	1.11548	-1.16993	0.137504	1	FALSE	FALSE	FALSE	FALSE	FALSE	FALSE
YDR421W	0	0.0995357	0.874469	0.584963	1	2.11548	FALSE	FALSE	FALSE	FALSE	FALSE	FALSE
YDR422C	1.44746	0.807355	1.63227	1.16993	2	1.03747	FALSE	FALSE	FALSE	FALSE	FALSE	FALSE
YDR423C	-3.90689	-4.04439	-4.43741	-5.32193	-4.90689	-4.75489	FALSE	FALSE	FALSE	FALSE	FALSE	FALSE
YDR424C	-0.832273	-0.847997	-0.30117	-1	-0.444302	-0.294447	TRUE	TRUE	TRUE	FALSE	TRUE	TRUE
YDR424C	NA	NA	NA	NA	NA	NA	FALSE	FALSE	FALSE	FALSE	FALSE	FALSE
YDR424C	NA	NA	NA	NA	NA	NA	FALSE	FALSE	FALSE	FALSE	FALSE	FALSE
YDR425W	0.106915	0.893085	0.788496	1.19265	0.387023	0.321928	FALSE	FALSE	FALSE	FALSE	FALSE	TRUE
YDR427W	0.925999	1	1.80735	0.241008	1.24101	-0.0874628	FALSE	FALSE	FALSE	FALSE	FALSE	FALSE
YDR428C	-0.584963	-0.807355	0.222392	-1	1	NA	FALSE	FALSE	FALSE	FALSE	FALSE	FALSE
YDR429C	-0.467606	-0.238787	0.263034	0.27208	-0.120854	-0.792767	TRUE	TRUE	TRUE	TRUE	TRUE	TRUE
YDR430C	-1	-1.35364	-0.440573	0.222392	0.884523	0.473931	FALSE	FALSE	FALSE	FALSE	FALSE	FALSE
YDR432W	-0.42553	-0.630766	-0.164275	-0.561879	0.0314782	-0.321928	TRUE	TRUE	TRUE	TRUE	TRUE	TRUE
YDR434W	-2.16993	-1.58496	-1.45943	1	-1	-1.58496	FALSE	FALSE	FALSE	FALSE	FALSE	FALSE
YDR435C	-2.41504	-1.22239	-0.459432	-1.58496	-1.26303	-1.26303	FALSE	FALSE	FALSE	FALSE	FALSE	FALSE
YDR436W	-1.67807	-0.825971	-1.52356	-1.54432	-1.0614	-1.09954	FALSE	TRUE	FALSE	FALSE	TRUE	TRUE
YDR437W	-2	-1.41504	-1.45943	NA	-2	-2	FALSE	FALSE	FALSE	FALSE	FALSE	FALSE
YDR438W	-1.16993	-2	-0.321928	0.847997	0	0.415037	FALSE	FALSE	FALSE	FALSE	FALSE	FALSE
YDR439W	-0.736966	NA	0.736966	1	1.58496	-0.584963	FALSE	FALSE	FALSE	FALSE	FALSE	FALSE
YDR440W	0.5025	1.87447	0.906891	1.58496	1.39855	-0.415037	FALSE	FALSE	FALSE	FALSE	FALSE	FALSE
YDR441C	-1.58496	0	-0.192645	-1.58496	-2.45943	-1	FALSE	FALSE	FALSE	FALSE	FALSE	FALSE
YDR443C	4.24793	3.36923	3.08746	1.28011	2.75489	2.12928	FALSE	FALSE	FALSE	FALSE	FALSE	FALSE
YDR444W	-1.70044	-2.85798	-2.16993	-2	-0.392317	-2.22239	FALSE	FALSE	FALSE	FALSE	FALSE	FALSE
YDR446W	NA	NA	NA	NA	NA	NA	FALSE	FALSE	FALSE	FALSE	FALSE	FALSE
YDR447C	1.32757	3.1964	2.13386	1.58496	2.19068	1.83289	TRUE	FALSE	TRUE	TRUE	TRUE	TRUE
YDR447C	NA	NA	NA	NA	NA	NA	FALSE	FALSE	FALSE	FALSE	FALSE	FALSE
YDR448W	1.91754	0.584963	1.80735	0.530515	1.078	0.628031	FALSE	FALSE	FALSE	FALSE	FALSE	FALSE
YDR449C	-0.229482	NA	-0.866733	0	-0.469485	0.415037	TRUE	FALSE	FALSE	FALSE	TRUE	FALSE
YDR450W	1.08951	1.26919	1.34986	1.74474	1.66995	1.69125	TRUE	TRUE	TRUE	TRUE	TRUE	TRUE
YDR450W	NA	NA	NA	NA	NA	NA	FALSE	FALSE	FALSE	FALSE	FALSE	FALSE
YDR451C	0.925999	-0.192645	2.58496	2.16993	0.616671	0.222392	FALSE	FALSE	FALSE	FALSE	FALSE	FALSE
YDR452W	0.478047	0.643856	-0.231326	0.862496	-0.0565835	0.970854	TRUE	TRUE	TRUE	FALSE	TRUE	TRUE
YDR453C	-0.36257	0.85561	-0.251539	0.906891	0.283793	0.874469	FALSE	TRUE	TRUE	FALSE	TRUE	FALSE
YDR454C	-0.584963	0.263034	0	2.16993	-0.115477	-3.58496	FALSE	FALSE	FALSE	FALSE	FALSE	FALSE
YDR456W	0.415037	0.584963	1	2.80735	0.584963	-0.485427	FALSE	FALSE	FALSE	FALSE	FALSE	FALSE
YDR457W	-2.06413	-0.662965	-1.88753	-1.80735	-1.38702	-2.23704	FALSE	FALSE	FALSE	FALSE	FALSE	FALSE
YDR458C	1.37197	0.530515	1.3356	1.64386	0.960472	1.078	FALSE	FALSE	TRUE	FALSE	TRUE	FALSE
YDR459C	-1.32193	-1	-0.736966	NA	-2.58496	-0.584963	FALSE	FALSE	FALSE	FALSE	FALSE	FALSE
YDR460W	-1.37851	-1.58496	-1	-0.192645	-0.874469	-0.736966	FALSE	FALSE	FALSE	FALSE	FALSE	FALSE
YDR461W	0.243557	0.235628	1.66347	1.08539	1.49825	1	TRUE	TRUE	TRUE	TRUE	TRUE	TRUE
YDR461C-A	0.337035	0.143735	0.782409	0.217231	0.261125	-0.241818	TRUE	TRUE	TRUE	TRUE	TRUE	TRUE
YDR462W	1.60266	2.38702	2.47508	2.52838	2	1.67557	TRUE	FALSE	TRUE	FALSE	TRUE	TRUE
YDR463W	0.767827	-0.514573	1.70454	0.415037	1	0.971986	TRUE	TRUE	TRUE	TRUE	TRUE	TRUE
YDR464W	-1.97982	-1.83007	-2.48938	-1.37851	-1.28688	-1	FALSE	FALSE	FALSE	FALSE	TRUE	FALSE
YDR465C	-0.0443941	0	0.736966	0.222392	0.270089	1.11548	TRUE	FALSE	TRUE	FALSE	TRUE	FALSE
YDR466W	0.415037	0.584963	-0.415037	-0.736966	0.514573	1	FALSE	FALSE	FALSE	FALSE	FALSE	FALSE
YDR468C	0	-0.906891	-0.0995357	0.807355	0.115477	-0.415037	FALSE	FALSE	FALSE	FALSE	FALSE	FALSE
YDR469W	0.0780025	-0.678072	-0.206451	0.736966	-0.534336	-0.584963	FALSE	FALSE	FALSE	FALSE	TRUE	FALSE
YDR470C	-0.63743	-0.289507	-1.19265	0	-0.947533	-0.180572	FALSE	FALSE	FALSE	FALSE	FALSE	FALSE
YDR471W	-1.86024	-1.70044	-1.77653	-1.15528	-1.40557	-1.39788	TRUE	TRUE	TRUE	TRUE	TRUE	TRUE
YDR471W	NA	NA	NA	NA	NA	NA	FALSE	FALSE	FALSE	FALSE	FALSE	FALSE
YDR472W	0.765535	0	1.28011	0.807355	1.22239	1.26303	FALSE	FALSE	FALSE	FALSE	FALSE	FALSE
YDR473C	0.485427	1.32193	1	1.41504	1.80735	2.80735	FALSE	FALSE	FALSE	FALSE	FALSE	FALSE
YDR475C	-0.569366	-0.59561	-0.527247	-0.514573	-0.0347654	-0.280108	TRUE	TRUE	TRUE	TRUE	TRUE	TRUE
YDR476C	-0.485427	-0.469485	0.652077	0.584963	0.452512	0.862496	FALSE	FALSE	FALSE	FALSE	FALSE	FALSE
YDR477W	-1.15528	-0.247928	-1.78241	-0.523562	-0.76033	-0.520832	TRUE	TRUE	TRUE	TRUE	TRUE	TRUE
YDR478W	-0.289507	-1.16993	-0.0703893	-2.58496	0.109624	-1	FALSE	FALSE	TRUE	FALSE	TRUE	FALSE
YDR479C	0	-0.777608	0.63743	-0.807355	0.321928	1.08246	FALSE	FALSE	FALSE	FALSE	FALSE	FALSE
YDR480W	-0.415037	-0.415037	0.925999	0	0.584963	0.415037	FALSE	FALSE	FALSE	FALSE	FALSE	FALSE
YDR481C	1.10692	0.917538	2.90689	1	1.96683	2.16993	FALSE	FALSE	FALSE	FALSE	FALSE	FALSE
YDR482C	-0.459432	-0.584963	0.0515303	-0.0995357	0.0558532	-0.152003	TRUE	TRUE	TRUE	FALSE	TRUE	TRUE
YDR483W	1.65951	1	2.58496	2.26679	2.65368	2.03342	TRUE	TRUE	TRUE	FALSE	TRUE	TRUE
YDR484W	1.37851	1.08746	1.1375	1.19265	1.75489	2.20945	FALSE	FALSE	FALSE	FALSE	FALSE	FALSE
YDR485C	1.24101	1.09954	3.39232	1.37851	1.27302	1.39232	FALSE	FALSE	FALSE	FALSE	FALSE	FALSE
YDR486C	-0.941897	-0.485427	-0.303069	-0.884523	-0.458106	-0.930737	TRUE	TRUE	TRUE	TRUE	TRUE	TRUE
YDR487C	0.678072	1.08746	0.765535	1.16993	0.971986	0.192645	TRUE	FALSE	TRUE	FALSE	TRUE	TRUE
YDR488C	-2.61891	-1.44746	-1.67807	-1.76553	-2.29278	-1.1375	FALSE	FALSE	TRUE	FALSE	TRUE	FALSE
YDR489W	-2.41504	-1	-0.906891	0.263034	-1.47393	-2.22239	FALSE	FALSE	FALSE	FALSE	FALSE	FALSE
YDR490C	0.584963	-0.222392	-0.736966	-1.58496	-2.58496	-0.847997	FALSE	FALSE	FALSE	FALSE	FALSE	FALSE
YDR492W	-1.90689	-0.485427	-2.15381	-1.45943	-1.77052	-0.289507	TRUE	FALSE	TRUE	FALSE	TRUE	FALSE
YDR493W	0.765535	-0.169925	0	0.180572	0.335603	0.263034	TRUE	TRUE	TRUE	FALSE	TRUE	TRUE
YDR494W	1.11548	0.887525	1.50901	0.706269	1.32193	0.874469	FALSE	TRUE	TRUE	FALSE	TRUE	TRUE
YDR495C	-2.32193	-1.82312	-1.46949	-0.621488	-1.73697	-1.3505	FALSE	FALSE	FALSE	FALSE	FALSE	TRUE
YDR496C	0.371969	-1	0.392317	-1	0.0721498	-0.652077	TRUE	FALSE	TRUE	FALSE	TRUE	FALSE
YDR497C	-0.194647	-0.423808	-0.535037	-0.634716	-0.289507	-0.222392	TRUE	TRUE	TRUE	TRUE	TRUE	TRUE
YDR498C	2.62449	2.88753	2.32193	3.52356	3.16993	3.27302	FALSE	FALSE	FALSE	FALSE	FALSE	FALSE
YDR499W	-1.39232	-3.70044	-0.906891	0.192645	-1.34792	-1.76553	FALSE	FALSE	FALSE	FALSE	FALSE	FALSE
YDR500C	0.160763	-0.0655883	0.43368	0.258859	0.548	0.187627	TRUE	TRUE	TRUE	TRUE	TRUE	TRUE
YDR500C	NA	NA	NA	NA	NA	NA	FALSE	FALSE	FALSE	FALSE	FALSE	FALSE
YDR501W	0.321928	-0.192645	-0.415037	1.41504	0.169925	0.584963	FALSE	FALSE	FALSE	FALSE	FALSE	FALSE
YDR502C	-0.353637	0.125531	0.667425	0.263034	-0.469485	-0.36257	FALSE	FALSE	FALSE	FALSE	FALSE	FALSE
YDR503C	0	1.32193	0.125531	0.70044	0.321928	0.917538	FALSE	FALSE	FALSE	FALSE	FALSE	FALSE
YDR504C	3.16993	1.70044	0	2.58496	3	2.11548	FALSE	FALSE	FALSE	FALSE	FALSE	FALSE
YDR505C	-2.87447	-0.807355	-1.11548	-1.37851	-1.76553	-0.678072	FALSE	FALSE	FALSE	FALSE	FALSE	FALSE
YDR506C	-0.584963	1.58496	0.807355	1.32193	1	0.584963	FALSE	FALSE	FALSE	FALSE	FALSE	FALSE
YDR507C	2	0.289507	1.32193	-0.192645	0.125531	0.736966	FALSE	FALSE	FALSE	FALSE	TRUE	FALSE
YDR508C	0.164387	0.0848889	-0.049753	-0.440573	0.131912	-0.807355	TRUE	TRUE	TRUE	TRUE	TRUE	TRUE
YDR510W	-1.46632	-1.70192	-1.02509	-0.964376	-1.04827	-1.58077	TRUE	TRUE	TRUE	TRUE	TRUE	TRUE
YDR511W	-0.736966	1.16993	0.241008	0	-0.584963	0.0931094	FALSE	FALSE	FALSE	FALSE	FALSE	FALSE
YDR512C	NA	NA	NA	NA	NA	NA	FALSE	FALSE	FALSE	FALSE	FALSE	FALSE
YDR513W	-0.378512	-0.530515	0.321928	-1.36257	0.186413	-0.773724	FALSE	TRUE	TRUE	FALSE	TRUE	TRUE
YDR514C	-0.540568	0.584963	1.39232	-1.32193	0.765535	0.514573	FALSE	FALSE	FALSE	FALSE	FALSE	FALSE
YDR515W	-0.192645	-0.263034	-1.22239	-0.807355	-0.0931094	0.247928	FALSE	FALSE	FALSE	FALSE	FALSE	FALSE
YDR516C	-1.76553	-0.910733	-1.67807	-1.42884	0.115477	-1.03847	FALSE	TRUE	FALSE	FALSE	FALSE	TRUE
YDR517W	-0.341037	0.584963	-0.353637	-2.24793	-0.436099	-0.440573	FALSE	FALSE	FALSE	FALSE	FALSE	FALSE
YDR518W	-0.917538	-1.26303	0.485427	-0.222392	-0.29956	-1	FALSE	FALSE	FALSE	FALSE	FALSE	FALSE
YDR519W	-0.36257	-0.584963	-0.736966	NA	0.847997	-1	FALSE	FALSE	FALSE	FALSE	FALSE	FALSE
YDR520C	-0.459432	0.584963	-0.514573	-0.415037	-1.66297	-1.19265	FALSE	FALSE	FALSE	FALSE	FALSE	FALSE
YDR522C	NA	NA	NA	NA	NA	NA	FALSE	FALSE	FALSE	FALSE	FALSE	FALSE
YDR523C	NA	NA	NA	NA	NA	NA	FALSE	FALSE	FALSE	FALSE	FALSE	FALSE
YDR524C	-0.106915	-0.678072	0.0931094	-3	0.530515	0.485427	FALSE	FALSE	FALSE	FALSE	FALSE	FALSE
YDR524W-C	NA	NA	NA	NA	NA	NA	FALSE	FALSE	FALSE	FALSE	FALSE	FALSE
YDR524C-B	-0.367666	-0.380686	-0.257988	-0.223096	-0.183374	-0.264222	TRUE	TRUE	TRUE	TRUE	TRUE	TRUE
YDR525W-A	-1.80735	-0.321928	0.472068	-0.584963	0.509014	-0.752072	FALSE	FALSE	TRUE	FALSE	TRUE	FALSE
YDR527W	-1	-0.485427	-0.777608	2.16993	0.793549	-1	FALSE	FALSE	FALSE	FALSE	FALSE	FALSE
YDR528W	-0.0824622	0.192645	0.868755	-0.736966	-0.0418202	0.584963	TRUE	FALSE	TRUE	FALSE	TRUE	FALSE
YDR529C	-0.584963	-1.03194	-0.672705	-0.717066	-0.847997	-0.859585	TRUE	TRUE	TRUE	TRUE	TRUE	TRUE
YDR530C	1.07276	1.19592	0.563901	0.611435	0.289507	0.526069	TRUE	TRUE	TRUE	TRUE	TRUE	TRUE
YDR531W	0.415037	-1.58496	-1.58496	-0.584963	-0.321928	0	FALSE	FALSE	FALSE	FALSE	FALSE	FALSE
YDR532C	-1.77761	-1	-1.75489	-0.289507	-0.906891	-1.1375	FALSE	FALSE	FALSE	FALSE	FALSE	FALSE
YDR533C	1.37851	0.819428	2.9386	1.5025	2.70044	1.11548	FALSE	FALSE	FALSE	FALSE	FALSE	FALSE
YDR534C	NA	-0.807355	NA	-2	NA	-1.11548	FALSE	FALSE	FALSE	FALSE	FALSE	FALSE
YDR536W	1.24793	0.926579	-0.222392	1.34491	1.48543	1.14796	FALSE	TRUE	FALSE	TRUE	FALSE	TRUE
YDR538W	0.459432	-1.32193	0.807355	0	1	-2.58496	FALSE	FALSE	FALSE	FALSE	FALSE	FALSE
YDR539W	-0.206451	-1.70044	-0.947533	-0.777608	-1.16993	-1.50901	FALSE	FALSE	FALSE	FALSE	FALSE	FALSE
YDR540C	NA	0	-1.80735	NA	-1.45943	-1.87447	FALSE	FALSE	FALSE	FALSE	FALSE	FALSE
YDR541C	3	2	1.90689	0.678072	NA	1	FALSE	FALSE	FALSE	FALSE	FALSE	FALSE
YDR542W	NA	-1	NA	NA	0	NA	FALSE	FALSE	FALSE	FALSE	FALSE	FALSE
YDR545W	NA	NA	NA	NA	NA	NA	FALSE	FALSE	FALSE	FALSE	FALSE	FALSE
YEL077C	-1.58496	NA	-1	NA	1	-1.58496	FALSE	FALSE	FALSE	FALSE	FALSE	FALSE
YEL076C-A	-1.89308	-0.893085	-1.75489	-0.584963	-0.765535	-1.078	FALSE	FALSE	FALSE	FALSE	FALSE	FALSE
YEL076C-A	NA	NA	NA	NA	NA	NA	FALSE	FALSE	FALSE	FALSE	FALSE	FALSE
YEL076C	-1.65208	-0.777608	-1.64386	-0.584963	-0.378512	-1	FALSE	FALSE	FALSE	FALSE	FALSE	FALSE
YEL075C	NA	NA	NA	NA	NA	NA	FALSE	FALSE	FALSE	FALSE	FALSE	FALSE
YEL073C	-1.24793	-1.44746	-3.70044	-4.58496	-2.73697	-3.16993	FALSE	FALSE	FALSE	FALSE	FALSE	FALSE
YEL072W	-5.64386	-3.80735	-1.71621	-3	-2.58496	-2.58496	FALSE	FALSE	FALSE	FALSE	FALSE	FALSE
YEL071W	0.215729	0.0931094	0.936806	-0.206451	0.343954	-0.76184	TRUE	FALSE	TRUE	FALSE	TRUE	TRUE
YEL070W	NA	NA	NA	NA	NA	NA	FALSE	FALSE	FALSE	FALSE	FALSE	FALSE
YEL069C	NA	NA	NA	NA	NA	NA	FALSE	FALSE	FALSE	FALSE	FALSE	FALSE
YEL067C	NA	NA	NA	NA	NA	NA	FALSE	FALSE	FALSE	FALSE	FALSE	FALSE
YEL066W	-3	-1.87447	-3.74416	-1.80735	-2.974	-3.22239	FALSE	FALSE	FALSE	FALSE	FALSE	FALSE
YEL065W	-0.222392	-0.415037	0.736966	0.263034	0.115477	0	FALSE	FALSE	FALSE	FALSE	TRUE	FALSE
YEL064C	1.58496	1.58496	3.45943	NA	2.45943	1.58496	FALSE	FALSE	FALSE	FALSE	FALSE	FALSE
YEL063C	-0.657112	0.201634	0.133267	-0.180572	-0.672425	-0.669851	TRUE	TRUE	TRUE	FALSE	TRUE	TRUE
YEL062W	-2	-0.415037	-0.652077	-0.777608	0.652077	-1	FALSE	FALSE	FALSE	FALSE	FALSE	FALSE
YEL061C	-0.652077	-0.321928	-1.11548	0.584963	-0.917538	0	FALSE	FALSE	FALSE	FALSE	FALSE	FALSE
YEL060C	0.122084	0.501787	0.976091	0.970184	0.934281	0.486698	TRUE	TRUE	TRUE	TRUE	TRUE	TRUE
YEL059C-A	1.66985	2.37851	2.45943	1.58496	3	3	FALSE	FALSE	FALSE	FALSE	FALSE	FALSE
YEL058W	0.777608	0.247928	0.345135	0.378512	0.447459	0.956931	TRUE	FALSE	TRUE	FALSE	TRUE	FALSE
YEL057C	1.5025	0.584963	-1.80735	-1.32193	-1.32193	0	FALSE	FALSE	FALSE	FALSE	FALSE	FALSE
YEL056W	2.80735	0.662965	3.08746	1.54057	1.23879	1.5025	FALSE	FALSE	FALSE	FALSE	TRUE	FALSE
YEL055C	-0.485427	-0.192645	0.152003	-0.321928	0.369234	-0.584963	TRUE	FALSE	TRUE	FALSE	TRUE	FALSE
YEL054C	-0.431553	-0.192645	-0.0506261	-0.0220263	-0.163006	-0.232661	TRUE	TRUE	TRUE	TRUE	TRUE	TRUE
YEL053C	1.16993	0.415037	0.736966	-1	0.321928	-2	FALSE	FALSE	FALSE	FALSE	FALSE	FALSE
YEL052W	-1.26303	-0.263034	-0.321928	0	1.37851	-2.58496	FALSE	FALSE	FALSE	FALSE	FALSE	FALSE
YEL051W	-0.155278	0.178337	0.834941	0.29956	0.196397	0.373458	TRUE	TRUE	TRUE	TRUE	TRUE	TRUE
YEL050C	1.91561	2.47393	2.70044	2.24793	2.65344	2.43741	TRUE	FALSE	FALSE	FALSE	TRUE	FALSE
YEL049W	NA	NA	0	NA	NA	-1.58496	FALSE	FALSE	FALSE	FALSE	FALSE	FALSE
YEL048C	-0.415037	NA	-0.584963	NA	0.415037	-1	FALSE	FALSE	FALSE	FALSE	FALSE	FALSE
YEL047C	-2.26303	-1.07039	-1.06413	-0.777608	-1.46949	-0.371969	FALSE	FALSE	FALSE	FALSE	FALSE	FALSE
YEL046C	-0.537266	-0.251539	-0.496676	-0.514573	-0.19977	-0.431716	TRUE	TRUE	TRUE	TRUE	TRUE	TRUE
YEL044W	-1.20945	-2.1375	-0.246438	-0.841302	-0.748461	-1.9419	TRUE	FALSE	TRUE	TRUE	TRUE	FALSE
YEL043W	-0.0473057	0.241008	-0.436099	0.777608	0.295456	-0.691878	TRUE	FALSE	FALSE	FALSE	TRUE	FALSE
YEL042W	0.160465	-1.44057	-1.11548	-1.08746	-0.807355	-1.11548	TRUE	FALSE	TRUE	FALSE	TRUE	FALSE
YEL041W	0.584963	-1.80735	NA	NA	NA	-2.80735	FALSE	FALSE	FALSE	FALSE	FALSE	FALSE
YEL040W	-1.9386	0.736966	-2	0	-1	0	FALSE	FALSE	FALSE	FALSE	FALSE	FALSE
YEL039C	-2.16993	-2.51937	-2.24793	-1.12199	-3.32193	-1.40551	FALSE	TRUE	FALSE	TRUE	FALSE	TRUE
YEL038W	1.58496	0.584963	0	0	2.90689	1.16993	FALSE	FALSE	FALSE	FALSE	FALSE	FALSE
YEL037C	0.131245	-0.111031	0.183122	0.0303736	0.146486	0.0660892	TRUE	TRUE	TRUE	TRUE	TRUE	TRUE
YEL036C	0.237039	-0.884523	-1.34792	-0.473931	0.321928	0.321928	TRUE	FALSE	FALSE	FALSE	TRUE	TRUE
YEL035C	NA	NA	0	NA	NA	NA	FALSE	FALSE	FALSE	FALSE	FALSE	FALSE
YEL034W	1.65845	1.19855	1.91555	1.42648	2.13012	1.71689	TRUE	TRUE	TRUE	TRUE	TRUE	TRUE
YEL033W	3.93447	3.39705	3.73804	3.44057	3.50834	3.48678	TRUE	TRUE	TRUE	TRUE	TRUE	TRUE
YEL032W	1.02801	0.693897	1.17585	1.1375	1.02783	0.608809	TRUE	TRUE	TRUE	TRUE	TRUE	TRUE
YEL031W	-1	-0.652077	0.616671	-0.263034	1.34792	0.0995357	FALSE	FALSE	FALSE	FALSE	FALSE	FALSE
YEL030W	-1.32193	-1.32193	-0.584963	-1.58496	-1.22239	-1	FALSE	FALSE	FALSE	FALSE	FALSE	FALSE
YEL029C	NA	NA	2.32193	NA	0.736966	0	FALSE	FALSE	FALSE	FALSE	FALSE	FALSE
YEL027W	1.67138	1.19794	1.53605	0.5025	1.59991	1.31451	TRUE	TRUE	TRUE	TRUE	TRUE	TRUE
YEL026W	1.16398	0.125531	0.704544	1.58496	0.725825	0.574236	TRUE	TRUE	TRUE	FALSE	TRUE	TRUE
YEL025C	-2.32193	-1.67807	-4.70044	-2.32193	-2.1375	-2.37851	FALSE	FALSE	FALSE	FALSE	FALSE	FALSE
YEL024W	-0.0544478	0.125531	1.4021	0.228269	0.784271	-0.106915	TRUE	TRUE	TRUE	TRUE	TRUE	TRUE
YEL023C	-2.32193	-1.80735	NA	NA	-1.80735	-0.736966	FALSE	FALSE	FALSE	FALSE	FALSE	FALSE
YEL022W	0.746243	0.563901	0.0641303	0.678072	-0.040642	1.55459	TRUE	TRUE	TRUE	FALSE	TRUE	FALSE
YEL021W	NA	NA	NA	NA	NA	NA	FALSE	FALSE	FALSE	FALSE	FALSE	FALSE
YEL020W-A	0.0554951	0.547488	2.09516	0.476438	1.45943	1.06711	TRUE	TRUE	TRUE	TRUE	TRUE	TRUE
YEL020C	0.584963	-0.584963	0.321928	-0.584963	-0.485427	1	FALSE	FALSE	FALSE	FALSE	FALSE	FALSE
YEL019C	-1.45943	NA	-3.45943	-0.584963	-1.45943	-2.32193	FALSE	FALSE	FALSE	FALSE	FALSE	FALSE
YEL018W	0.395929	0.509014	0.807355	0.688056	0.065095	0.118644	TRUE	TRUE	TRUE	FALSE	TRUE	TRUE
YEL017C-A	-0.945257	-0.731183	-0.55141	-0.900464	-0.36995	-0.473931	TRUE	TRUE	TRUE	FALSE	TRUE	TRUE
YEL017W	-0.275634	-0.628031	0.667425	-2.37851	1.26303	-0.0931094	FALSE	FALSE	FALSE	FALSE	FALSE	FALSE
YEL016C	-0.0565835	-0.280108	1	-0.263034	0.0931094	2.08746	TRUE	FALSE	FALSE	FALSE	FALSE	FALSE
YEL015W	1.55837	1.31487	1.12262	0.956931	1.85415	0.654004	TRUE	TRUE	TRUE	TRUE	TRUE	TRUE
YEL013W	-0.180572	-0.29956	-0.263034	-1.1375	0.710493	-0.321928	FALSE	FALSE	TRUE	FALSE	FALSE	FALSE
YEL012W	-0.89812	0.498806	-0.228269	0.040642	-0.425306	0.24664	TRUE	TRUE	TRUE	TRUE	TRUE	TRUE
YEL012W	NA	NA	NA	NA	NA	NA	FALSE	FALSE	FALSE	FALSE	FALSE	FALSE
YEL011W	-0.736966	-1.80735	-0.459432	-0.652077	-0.807355	-0.736966	FALSE	FALSE	FALSE	TRUE	FALSE	TRUE
YEL009C	0.597453	0.952694	0.074547	0.485427	0.461331	0.289507	TRUE	TRUE	TRUE	TRUE	TRUE	TRUE
YEL007W	-1.67807	-1.58496	-1.58496	-1	-1.53605	-2.63227	FALSE	FALSE	FALSE	FALSE	FALSE	FALSE
YEL006W	-1.47393	-0.115477	-0.106915	1.45943	-0.180572	0.925999	FALSE	FALSE	FALSE	FALSE	FALSE	FALSE
YEL005C	-1.80735	0	0.263034	0	0.485427	-0.222392	FALSE	FALSE	FALSE	FALSE	FALSE	FALSE
YEL004W	0.169925	0.777608	2.5025	3.16993	1.07039	2.5025	FALSE	FALSE	FALSE	FALSE	FALSE	FALSE
YEL003W	-1.6865	-1.96683	-1.60572	-2.25376	-1.27886	-1.78022	TRUE	FALSE	TRUE	FALSE	TRUE	TRUE
YEL003W	NA	NA	NA	NA	NA	NA	FALSE	FALSE	FALSE	FALSE	FALSE	FALSE
YEL002C	-0.160465	-0.201634	-0.152003	-0.36257	0	-0.432959	FALSE	TRUE	FALSE	FALSE	FALSE	TRUE
YEL001C	-0.0703893	-1.52356	0.285402	-0.584963	1.1375	0.295456	TRUE	FALSE	TRUE	FALSE	TRUE	TRUE
YER001W	0.36257	-0.321928	0.277534	-0.584963	0.964376	0.874469	TRUE	FALSE	TRUE	FALSE	TRUE	FALSE
YER002W	-0.74366	-1.89308	-1.01749	-1.44057	-0.941106	-1.78427	TRUE	FALSE	TRUE	FALSE	TRUE	FALSE
YER003C	-0.906891	-1.03747	-0.643065	-1.19794	-0.399096	-1.02554	TRUE	TRUE	TRUE	TRUE	TRUE	TRUE
YER003C	NA	NA	NA	NA	NA	NA	FALSE	FALSE	FALSE	FALSE	FALSE	FALSE
YER004W	-2.40881	-3.06848	-2.13327	-3.56986	-1.60881	-2.98793	TRUE	FALSE	TRUE	FALSE	TRUE	FALSE
YER005W	-0.0874628	1.22239	0.206451	-0.152003	0.36257	1	FALSE	FALSE	FALSE	FALSE	FALSE	FALSE
YER006W	0.0843922	-0.14439	-0.691878	-1.04731	-0.578173	-0.509014	TRUE	FALSE	TRUE	FALSE	TRUE	TRUE
YER007W	0.678072	0	2.80735	NA	1.45943	0	FALSE	FALSE	FALSE	FALSE	FALSE	FALSE
YER007C-A	1.02714	0.963474	1.68281	1.08964	1.62882	0.743225	TRUE	TRUE	TRUE	TRUE	TRUE	TRUE
YER007C-A	NA	NA	NA	NA	NA	NA	FALSE	FALSE	FALSE	FALSE	FALSE	FALSE
YER008C	1.54057	-0.459432	1.9386	1.1375	3	0.70044	FALSE	FALSE	FALSE	FALSE	FALSE	FALSE
YER009W	-0.708951	-0.490986	-0.518873	-0.0901978	0.0565835	0.147557	TRUE	TRUE	TRUE	TRUE	TRUE	TRUE
YER010C	-0.89812	-1.15754	-0.968291	-1.83007	0.0892673	-1.08246	TRUE	FALSE	TRUE	FALSE	TRUE	FALSE
YER011W	-1.41504	-1.80735	0.777608	1.22239	-0.874469	1.77761	FALSE	FALSE	FALSE	FALSE	FALSE	FALSE
YER012W	-0.339486	-0.103623	0.0285692	0.632268	0.304006	0.0437214	TRUE	TRUE	TRUE	TRUE	TRUE	TRUE
YER013W	1.41504	2	NA	-1.80735	2.39232	1.48543	FALSE	FALSE	FALSE	FALSE	FALSE	FALSE
YER014W	-1.65208	-1.37851	-0.584963	-1.22239	-0.966833	-0.793549	FALSE	FALSE	TRUE	FALSE	TRUE	FALSE
YER014C-A	NA	NA	NA	NA	NA	NA	FALSE	FALSE	FALSE	FALSE	FALSE	FALSE
YER014C-A	NA	NA	NA	NA	NA	NA	FALSE	FALSE	FALSE	FALSE	FALSE	FALSE
YER015W	2.58496	-1.58496	0.584963	0.584963	0.415037	-1	FALSE	FALSE	FALSE	FALSE	FALSE	FALSE
YER016W	0.137504	0.192645	1.07529	0.201634	0.657894	-0.36257	TRUE	TRUE	TRUE	TRUE	TRUE	TRUE
YER017C	-0.662965	0.63743	-0.415037	-0.847997	-1.32193	-0.938599	FALSE	FALSE	FALSE	FALSE	FALSE	FALSE
YER018C	-0.415037	-0.900464	-1	0.5025	0.0365259	-0.31034	TRUE	FALSE	TRUE	FALSE	TRUE	TRUE
YER019W	-3.32193	-2	NA	-2	NA	NA	FALSE	FALSE	FALSE	FALSE	FALSE	FALSE
YER019C-A	-1.0592	-0.946561	-0.385193	0	-0.476256	-0.538269	TRUE	TRUE	TRUE	TRUE	TRUE	TRUE
YER020W	-0.780687	-0.665581	0.0565835	-0.0317089	-0.546282	-0.139725	TRUE	TRUE	TRUE	TRUE	TRUE	TRUE
YER021W	-0.70044	0.0759489	0.249978	-0.241008	-0.049753	-0.263034	TRUE	TRUE	TRUE	TRUE	TRUE	TRUE
YER022W	1.45943	1.5025	1.46949	0.678072	1.9386	0.830075	FALSE	FALSE	FALSE	FALSE	FALSE	FALSE
YER023W	0.295456	0.777608	1.0902	1.38702	1.2854	1.27684	TRUE	TRUE	TRUE	FALSE	TRUE	TRUE
YER024W	-1.41504	-1	-1.41504	NA	-0.321928	0	FALSE	FALSE	FALSE	FALSE	FALSE	FALSE
YER025W	0.805781	0.543622	1.43145	0.902703	1.15587	0.598902	TRUE	TRUE	TRUE	TRUE	TRUE	TRUE
YER026C	0.518467	0.0223678	0.141176	0.27208	0.276124	0.263034	TRUE	TRUE	TRUE	TRUE	TRUE	TRUE
YER027C	-2.45943	-0.415037	-2	-0.584963	0.415037	-0.777608	FALSE	FALSE	FALSE	FALSE	FALSE	FALSE
YER028C	0.447459	-3.45943	-0.415037	-3.32193	-2.16993	-1.90689	FALSE	FALSE	FALSE	FALSE	FALSE	FALSE
YER029C	-0.0721498	-0.275634	0.112475	-0.115477	0.347923	-0.263034	TRUE	FALSE	TRUE	FALSE	TRUE	TRUE
YER030W	-2.95936	-2.97982	-2.64386	-2.60407	-2.42429	-2.74474	TRUE	FALSE	TRUE	TRUE	TRUE	TRUE
YER031C	0.72316	1.63743	1.55596	2.70044	1.22471	1.81943	TRUE	TRUE	TRUE	FALSE	TRUE	TRUE
YER032W	0.337035	0.847997	1.38702	1	1.23704	1.22239	FALSE	FALSE	FALSE	FALSE	FALSE	FALSE
YER033C	-1.37851	-0.473931	-1.16993	-1.52356	-0.807355	-0.662965	FALSE	FALSE	FALSE	FALSE	FALSE	FALSE
YER034W	-1.33442	-1.6865	-0.987722	-0.939879	-0.96721	-1.15528	TRUE	TRUE	TRUE	TRUE	TRUE	TRUE
YER035W	-2.14326	-1.91754	-1.95228	-1.65411	-1.91677	-1.71237	TRUE	TRUE	TRUE	TRUE	TRUE	TRUE
YER036C	-0.450661	-0.0931094	0.660514	1.078	0.688056	0.31034	TRUE	FALSE	TRUE	FALSE	TRUE	TRUE
YER037W	-1.58496	-0.70044	-0.289507	-0.222392	0.152003	-0.63743	FALSE	TRUE	FALSE	FALSE	FALSE	TRUE
YER038C	-2.41504	-1.58496	-3.80735	NA	-3.24793	-2.80735	FALSE	FALSE	FALSE	FALSE	FALSE	FALSE
YER039C	NA	1.58496	NA	1.58496	NA	NA	FALSE	FALSE	FALSE	FALSE	FALSE	FALSE
YER039C-A	3	2.70044	0.807355	3.32193	2.22239	3.24793	FALSE	FALSE	FALSE	FALSE	FALSE	FALSE
YER040W	0.514573	-0.514573	0.395929	0.847997	-0.184425	0.893085	FALSE	FALSE	FALSE	FALSE	TRUE	FALSE
YER041W	0.584963	0.514573	0.736966	-0.736966	-0.736966	0.514573	FALSE	FALSE	FALSE	FALSE	FALSE	FALSE
YER042W	-0.540568	0	0.241008	-0.415037	-0.807355	-0.36257	FALSE	FALSE	FALSE	FALSE	FALSE	FALSE
YER043C	-0.130061	-0.0759489	-0.138328	-0.192645	-0.154577	0.129768	TRUE	TRUE	TRUE	TRUE	TRUE	TRUE
YER044C	-0.584963	-0.754888	1.76553	-1.11548	-0.321928	-0.111031	FALSE	FALSE	FALSE	FALSE	FALSE	TRUE
YER044C-A	NA	NA	NA	NA	NA	NA	FALSE	FALSE	FALSE	FALSE	FALSE	FALSE
YER044C-A	NA	NA	NA	NA	NA	NA	FALSE	FALSE	FALSE	FALSE	FALSE	FALSE
YER045C	1.32193	-0.415037	-1.32193	NA	-1.32193	-1	FALSE	FALSE	FALSE	FALSE	FALSE	FALSE
YER046W	-1.152	-1.32193	-1.15754	-0.917538	-0.847997	-1.11548	FALSE	FALSE	FALSE	FALSE	TRUE	FALSE
YER047C	-1.41504	-0.807355	-1.41504	-2.58496	-1.1375	-0.652077	FALSE	FALSE	FALSE	FALSE	FALSE	FALSE
YER048C	-1.38827	-0.40439	-0.981384	-1.4021	-0.522421	-0.510962	TRUE	TRUE	TRUE	FALSE	TRUE	TRUE
YER048W-A	0.271302	0	0.83399	0	0.389947	0.263034	TRUE	TRUE	TRUE	TRUE	TRUE	TRUE
YER049W	-0.415037	0	0.378512	-0.206451	0.125531	0.201634	TRUE	FALSE	TRUE	FALSE	TRUE	TRUE
YER050C	0.285402	0.321928	0.27208	-0.111031	-0.321928	-0.0259952	TRUE	TRUE	TRUE	TRUE	TRUE	TRUE
YER051W	-1.26303	0.415037	0.395929	-1	-1.58496	0.387023	FALSE	FALSE	FALSE	FALSE	FALSE	FALSE
YER052C	-1.9349	-1.87447	-2.36257	-1.54749	-1.52484	-1.55459	TRUE	FALSE	TRUE	FALSE	TRUE	FALSE
YER053C	0.263034	0.331844	1	0.641546	1.28951	0.422233	FALSE	TRUE	FALSE	TRUE	FALSE	TRUE
YER053C-A	-1.10692	-1.63387	-0.584963	-0.936806	-1.12928	-0.978107	FALSE	TRUE	TRUE	TRUE	FALSE	TRUE
YER054C	-1.58496	-1.78588	-0.874469	-1.69032	-2.32193	-0.970854	FALSE	TRUE	FALSE	TRUE	FALSE	TRUE
YER055C	-1.25154	-0.415037	-0.275634	-0.584963	0.0671142	-0.893085	TRUE	FALSE	TRUE	FALSE	TRUE	FALSE
YER056C	-0.904422	-1.10434	-0.828234	-1.58496	-1.04026	-0.652077	TRUE	TRUE	TRUE	FALSE	TRUE	TRUE
YER056C-A	-1.46448	-1.11315	-0.815661	-0.750805	-0.75743	-0.962437	TRUE	TRUE	TRUE	TRUE	TRUE	TRUE
YER056C-A	NA	NA	NA	NA	NA	NA	FALSE	FALSE	FALSE	FALSE	FALSE	FALSE
YER057C	0.557995	0.68281	0.725825	1.25154	0.946758	1.45943	TRUE	TRUE	TRUE	TRUE	TRUE	TRUE
YER058W	1.29768	1.22239	0.979241	0.371969	1.84549	1.43741	TRUE	TRUE	TRUE	FALSE	TRUE	TRUE
YER059W	-1.52356	0.0780025	-1.44057	-1.09954	-0.621488	-0.900464	FALSE	FALSE	FALSE	FALSE	FALSE	FALSE
YER060W	NA	0	-1	1	0	NA	FALSE	FALSE	FALSE	FALSE	FALSE	FALSE
YER060W-A	0	0.584963	NA	NA	NA	NA	FALSE	FALSE	FALSE	FALSE	FALSE	FALSE
YER061C	0.893085	1.1375	0.263034	3.45943	0.447459	-0.125531	FALSE	FALSE	FALSE	FALSE	FALSE	FALSE
YER062C	0.113211	0.736966	0.347923	0.955331	-0.401363	1.04173	TRUE	TRUE	TRUE	TRUE	TRUE	TRUE
YER063W	0.799701	0.780687	1.20645	1.28011	1.10852	0.256775	TRUE	TRUE	TRUE	TRUE	TRUE	TRUE
YER064C	-0.934112	-0.321928	-0.780687	-0.321928	-0.944858	-1.34792	TRUE	TRUE	TRUE	TRUE	TRUE	TRUE
YER065C	-1.22239	-1.16993	-1.58496	1	0.807355	0.289507	FALSE	FALSE	FALSE	FALSE	FALSE	FALSE
YER066W	0	0.584963	-1.73697	-1.58496	0	-1	FALSE	FALSE	FALSE	FALSE	FALSE	FALSE
YER067W	-1.59637	-1.94991	-1.46609	-1.61121	-1.25678	-1.44304	TRUE	TRUE	TRUE	TRUE	TRUE	TRUE
YER068W	-1.22239	-2.16993	-1.32193	0	-0.378512	-0.862496	FALSE	FALSE	FALSE	FALSE	FALSE	FALSE
YER069W	0.748461	1.22239	1.67807	0.584963	0.925999	0.192645	TRUE	FALSE	FALSE	FALSE	TRUE	FALSE
YER070W	0.499102	-0.906891	0.136573	0.334419	0.0937821	0.370368	TRUE	FALSE	TRUE	TRUE	TRUE	TRUE
YER071C	-1.68806	-5	-2.87447	-1.5025	-2.68806	-3.42626	FALSE	FALSE	FALSE	FALSE	FALSE	FALSE
YER072W	-0.584963	-0.0931094	-0.478047	-0.559427	-0.600393	-0.853159	TRUE	TRUE	TRUE	FALSE	TRUE	TRUE
YER073W	1.03953	0.192645	1.9386	2	0.684498	0.415037	FALSE	FALSE	FALSE	FALSE	TRUE	FALSE
YER074W	0.568138	0.610588	1.05369	0.79886	0.958641	0.937536	TRUE	TRUE	TRUE	TRUE	TRUE	TRUE
YER074W	NA	NA	NA	NA	NA	NA	FALSE	FALSE	FALSE	FALSE	FALSE	FALSE
YER074W-A	-1.2718	-1.06413	-0.321928	-1.37346	0.190822	-0.355481	TRUE	TRUE	TRUE	TRUE	TRUE	TRUE
YER074W-A	NA	NA	NA	NA	NA	NA	FALSE	FALSE	FALSE	FALSE	FALSE	FALSE
YER074W-A	NA	NA	NA	NA	NA	NA	FALSE	FALSE	FALSE	FALSE	FALSE	FALSE
YER075C	2.80735	0.584963	1	-1	0.678072	0.893085	FALSE	FALSE	FALSE	FALSE	FALSE	FALSE
YER076C	1.34792	1.07039	4.9542	NA	3.42626	3.20945	FALSE	FALSE	FALSE	FALSE	FALSE	FALSE
YER077C	NA	NA	NA	NA	-3.32193	-2.80735	FALSE	FALSE	FALSE	FALSE	FALSE	FALSE
YER078C	0.415037	1.58496	0.222392	-1.58496	1.26303	1.58496	FALSE	FALSE	FALSE	FALSE	FALSE	FALSE
YER078W-A	NA	NA	NA	NA	NA	NA	FALSE	FALSE	FALSE	FALSE	FALSE	FALSE
YER079W	0.263034	0.817136	0.736966	0.900464	1.1375	2.26849	FALSE	TRUE	FALSE	FALSE	FALSE	FALSE
YER080W	2.05658	1.32193	2.50589	2.02748	2.37412	1.48875	TRUE	TRUE	TRUE	FALSE	TRUE	TRUE
YER081W	1.04891	0.70044	1.37851	1.05889	2.13386	1.1964	TRUE	TRUE	TRUE	FALSE	FALSE	TRUE
YER082C	-1.22239	-0.415037	-0.367732	-0.447459	-0.600393	-1	TRUE	FALSE	TRUE	FALSE	TRUE	FALSE
YER083C	-0.634716	-0.773229	0.328623	0.0347654	0.433987	-0.0681715	TRUE	TRUE	TRUE	TRUE	TRUE	TRUE
YER085C	NA	NA	0	NA	NA	-1	FALSE	FALSE	FALSE	FALSE	FALSE	FALSE
YER086W	-0.570316	-0.5025	-0.347923	0	0.350497	-0.0780025	TRUE	FALSE	TRUE	FALSE	TRUE	FALSE
YER087W	NA	-0.415037	1	0	1	1.80735	FALSE	FALSE	FALSE	FALSE	FALSE	FALSE
YER087C-B	1.17719	0.457207	2.1589	1.67319	1.89003	1.52973	TRUE	TRUE	TRUE	TRUE	TRUE	TRUE
YER088C	0	1.16046	1.22239	1.4021	1.10434	0.561879	TRUE	FALSE	TRUE	FALSE	TRUE	TRUE
YER089C	-0.485427	0.807355	-1.32193	-0.807355	-0.830075	-0.485427	FALSE	FALSE	FALSE	FALSE	FALSE	FALSE
YER090W	0.222392	0.807355	0.280108	1.58496	-0.0780025	0.378512	FALSE	FALSE	FALSE	FALSE	FALSE	FALSE
YER091C	-0.621488	-0.474909	-0.749192	-0.584963	-0.672705	-0.635589	TRUE	TRUE	TRUE	TRUE	TRUE	TRUE
YER092W	-2.73697	-2.45066	-2.46713	-3.35755	-2.43888	-2.94145	TRUE	FALSE	TRUE	FALSE	TRUE	TRUE
YER093C	1.73697	1.73697	0.415037	0.169925	1.23447	1.16993	FALSE	FALSE	TRUE	FALSE	FALSE	FALSE
YER093C-A	-0.308122	-0.215729	0	-0.263034	-0.0443941	-0.815575	TRUE	TRUE	TRUE	TRUE	TRUE	TRUE
YER093C-A	NA	NA	NA	NA	NA	NA	FALSE	FALSE	FALSE	FALSE	FALSE	FALSE
YER094C	-0.226771	-0.140178	-0.0861566	-0.536053	-0.147557	-0.480626	TRUE	TRUE	TRUE	TRUE	TRUE	TRUE
YER095W	-2.90689	-2.66297	-1.90046	-3	-2.61891	-2.974	FALSE	FALSE	FALSE	FALSE	FALSE	FALSE
YER096W	NA	NA	NA	NA	NA	NA	FALSE	FALSE	FALSE	FALSE	FALSE	FALSE
YER098W	-0.415037	-0.415037	-1.41504	-1.41504	-0.321928	0.169925	FALSE	FALSE	FALSE	FALSE	FALSE	FALSE
YER099C	0	0.180572	-0.36257	-1.52356	0.0473057	-0.736966	TRUE	FALSE	TRUE	FALSE	TRUE	FALSE
YER100W	0.184425	-0.415037	0.153012	-0.208587	0.777608	-0.401098	TRUE	TRUE	TRUE	TRUE	TRUE	TRUE
YER101C	0.137504	1.16993	1.80735	1.44057	1.38702	1	FALSE	FALSE	FALSE	FALSE	FALSE	FALSE
YER102W	-5.32707	-6.88264	-8.29002	NA	-6.51175	-5.9386	FALSE	FALSE	FALSE	FALSE	FALSE	FALSE
YER103W	-0.777608	-0.4975	-1.04182	-0.216811	-0.866733	-0.117357	FALSE	TRUE	FALSE	TRUE	FALSE	TRUE
YER104W	1.35364	-0.192645	1.078	1.16993	2	0.584963	FALSE	FALSE	FALSE	FALSE	FALSE	FALSE
YER105C	0.95109	3.16993	0.628031	2.58496	1.10434	1.87447	FALSE	FALSE	FALSE	FALSE	TRUE	FALSE
YER106W	NA	NA	1	NA	0	0	FALSE	FALSE	FALSE	FALSE	FALSE	FALSE
YER107C	0.800691	0.415037	0.790547	1.54057	1.24393	0.823122	TRUE	FALSE	TRUE	FALSE	TRUE	TRUE
YER109C	0.459432	-0.295456	0.415037	-0.63743	0.0506261	-0.912537	TRUE	TRUE	TRUE	FALSE	TRUE	FALSE
YER110C	-0.610053	0.459432	-0.902703	0.192645	-1.20645	-0.263034	TRUE	FALSE	TRUE	FALSE	TRUE	FALSE
YER111C	-0.485427	0.222392	0	2	-3	1	FALSE	FALSE	FALSE	FALSE	FALSE	FALSE
YER112W	-1	-0.436099	-0.255257	-0.392317	-1	-0.754888	FALSE	FALSE	TRUE	FALSE	TRUE	FALSE
YER113C	0.752072	-0.263034	0.356144	0.530515	1.23704	-0.0671142	FALSE	TRUE	TRUE	FALSE	FALSE	TRUE
YER114C	-0.954196	-0.63743	-0.612977	0	-1.6845	-0.540568	FALSE	FALSE	FALSE	FALSE	FALSE	FALSE
YER115C	-1.65208	-1.45943	-1.37851	NA	-0.736966	-1.37851	FALSE	FALSE	FALSE	FALSE	FALSE	FALSE
YER116C	1	-0.115477	-0.777608	-0.241008	0.459432	0.0740006	FALSE	FALSE	FALSE	FALSE	TRUE	FALSE
YER117W	-0.644284	-0.736966	-0.948601	-0.868755	-0.586415	-0.347923	TRUE	TRUE	TRUE	TRUE	TRUE	TRUE
YER117W	NA	NA	NA	NA	NA	NA	FALSE	FALSE	FALSE	FALSE	FALSE	FALSE
YER118C	-1.70044	-2.16993	-0.70044	-1.16993	-1.29546	-1.16993	FALSE	FALSE	FALSE	FALSE	FALSE	FALSE
YER119C	0.36257	1.73697	1.09954	2.32193	1.70044	1.41504	FALSE	FALSE	FALSE	FALSE	FALSE	FALSE
YER120W	1	0.520832	1.21077	1.29956	1.17132	0.792195	TRUE	TRUE	TRUE	TRUE	TRUE	TRUE
YER121W	-0.584963	-1.52725	-2.58496	0	-2.32193	-1.41504	FALSE	FALSE	FALSE	FALSE	FALSE	FALSE
YER122C	0	1.58496	1.11548	0.378512	0.893085	-0.152003	FALSE	FALSE	FALSE	FALSE	FALSE	FALSE
YER123W	-0.405256	-0.612977	-0.605721	-0.736966	0.184425	-0.0848889	TRUE	FALSE	TRUE	FALSE	TRUE	TRUE
YER124C	1.97046	1.62015	2.62619	1.6939	2.70426	1.91754	TRUE	TRUE	TRUE	FALSE	TRUE	TRUE
YER125W	1.54432	1.35755	1.03242	0.395929	1.11103	1.28951	TRUE	FALSE	TRUE	FALSE	TRUE	TRUE
YER126C	-0.434937	-1.18442	-0.134542	-0.280108	-0.0721498	-0.773724	TRUE	FALSE	TRUE	TRUE	TRUE	TRUE
YER127W	-0.0524674	0.736966	0.678072	0	0.565597	-0.415037	TRUE	FALSE	FALSE	FALSE	TRUE	FALSE
YER128W	1	-0.321928	-0.584963	-0.584963	-0.152003	0.263034	FALSE	FALSE	FALSE	FALSE	FALSE	FALSE
YER129W	0.900464	0.925999	0.436099	0.881356	-0.131245	0.137504	TRUE	TRUE	TRUE	FALSE	TRUE	TRUE
YER130C	0.192645	0.0740006	0.823122	0.584963	0.642448	-0.584963	TRUE	TRUE	TRUE	FALSE	TRUE	TRUE
YER131W	-5.20344	-3.98995	-5.11746	-5.71882	-5.48266	-6.08746	FALSE	FALSE	FALSE	FALSE	FALSE	FALSE
YER132C	2.80735	-1.41504	0	0	0	NA	FALSE	FALSE	FALSE	FALSE	FALSE	FALSE
YER133W	1.4944	1.09868	1.38466	0.5542	1.35327	0.682971	TRUE	TRUE	TRUE	TRUE	TRUE	TRUE
YER133W	NA	NA	NA	NA	NA	NA	FALSE	FALSE	FALSE	FALSE	FALSE	FALSE
YER134C	0.777608	-0.378512	0.830075	1	0	1.05889	FALSE	FALSE	FALSE	FALSE	FALSE	FALSE
YER136W	-1.45943	-0.415037	0.115477	-0.807355	-1.28011	0.206451	FALSE	FALSE	FALSE	FALSE	FALSE	FALSE
YER137C	-0.378512	-0.485427	0.584963	NA	-0.0588937	1.73697	FALSE	FALSE	FALSE	FALSE	TRUE	FALSE
YER138W-A	NA	NA	NA	NA	NA	NA	FALSE	FALSE	FALSE	FALSE	FALSE	FALSE
YER139C	1.06413	1.22239	0	1.32193	1	0.206451	FALSE	FALSE	FALSE	FALSE	FALSE	FALSE
YER140W	-0.321928	-0.415037	1	NA	0.378512	1	FALSE	FALSE	FALSE	FALSE	FALSE	FALSE
YER141W	-1.26303	-0.602665	-0.602665	-0.830075	-0.476438	-0.704544	TRUE	TRUE	TRUE	FALSE	TRUE	TRUE
YER142C	-0.485427	-1.07039	-1.5025	-0.710493	0	-0.906891	FALSE	FALSE	FALSE	FALSE	FALSE	FALSE
YER143W	0.402098	0.736966	0.427421	0.736966	0.514573	1.02857	TRUE	TRUE	TRUE	FALSE	TRUE	TRUE
YER144C	-2.58496	-5.08746	-2.09954	-3.24793	-4.08746	-3.64386	FALSE	FALSE	FALSE	FALSE	FALSE	FALSE
YER145C	0.825971	1	1.54749	0.584963	2.92892	0.736966	TRUE	FALSE	TRUE	FALSE	FALSE	FALSE
YER146W	-0.647698	-0.838249	0.281182	-0.952694	0.115477	-0.228269	TRUE	TRUE	TRUE	TRUE	TRUE	TRUE
YER147C	3	0	0.485427	1.58496	-0.152003	2	FALSE	FALSE	FALSE	FALSE	FALSE	FALSE
YER148W	-1.51818	-1.33092	-1.14864	-0.898717	-1.4926	-0.991872	TRUE	TRUE	TRUE	TRUE	TRUE	TRUE
YER149C	-0.415037	-0.530515	-1.41504	-1.65208	-0.584963	-1.69188	TRUE	FALSE	FALSE	FALSE	TRUE	FALSE
YER150W	-1.32716	-0.655554	-0.383047	-0.181711	-0.750549	-0.442274	TRUE	TRUE	TRUE	TRUE	TRUE	TRUE
YER151C	-1.24511	-0.773724	-0.813587	-2.03953	-1.4361	-0.469485	TRUE	TRUE	TRUE	FALSE	TRUE	TRUE
YER152C	-1.02385	0.530515	0.4975	-0.485427	0.505235	-0.556393	TRUE	FALSE	TRUE	FALSE	TRUE	FALSE
YER153C	-1.03953	-0.530515	-1.80735	-0.469485	-1.67807	-1.20163	FALSE	FALSE	FALSE	FALSE	FALSE	FALSE
YER154W	-1.22239	-2.45943	-1.2115	-1.37851	-2.02975	-1.28951	FALSE	FALSE	FALSE	FALSE	FALSE	FALSE
YER155C	-0.943416	-0.514573	-0.40439	-0.169925	0.0264722	0.283793	TRUE	TRUE	TRUE	TRUE	TRUE	TRUE
YER156C	1.2854	0.584963	1	-0.678072	1.90689	0.5025	FALSE	FALSE	TRUE	FALSE	TRUE	FALSE
YER157W	-1.58496	-1.67807	-1	-1	-0.485427	-1.66297	FALSE	FALSE	FALSE	FALSE	FALSE	FALSE
YER158C	0	-1.58496	2	1.58496	0.736966	1	FALSE	FALSE	FALSE	FALSE	FALSE	FALSE
YER159C	-1.03639	-0.791413	-1.16644	-0.624491	-0.881854	-0.17568	TRUE	TRUE	TRUE	TRUE	TRUE	TRUE
YER161C	1.75002	0.830075	2.23447	3.64386	2.67243	1.83007	FALSE	FALSE	FALSE	FALSE	FALSE	FALSE
YER162C	1.31194	0.232661	1.2854	1.53051	1.11289	0.75336	TRUE	TRUE	TRUE	FALSE	TRUE	TRUE
YER163C	-1.45943	-1.51457	-2.14296	-0.906891	-1	-1.78427	FALSE	FALSE	FALSE	FALSE	FALSE	FALSE
YER164W	-0.584963	-1.58496	-1.32193	-0.777608	-0.736966	-0.0995357	FALSE	FALSE	FALSE	FALSE	FALSE	FALSE
YER165W	-0.724687	-0.615336	-1.11426	-0.269187	-0.86535	-0.874469	TRUE	TRUE	TRUE	TRUE	TRUE	TRUE
YER166W	-0.976541	-0.584963	-0.569366	-1.62149	-2.21632	-1.21299	TRUE	TRUE	TRUE	FALSE	FALSE	TRUE
YER167W	-0.485427	0.369234	-0.665581	2.45943	-0.440573	1.05063	TRUE	TRUE	TRUE	FALSE	TRUE	FALSE
YER168C	0.280108	0.485427	1.52356	1.16993	1.53051	0.725825	FALSE	FALSE	FALSE	FALSE	FALSE	TRUE
YER169W	-1.9386	-1.78427	-0.862496	0.222392	-1.63743	-1.36257	FALSE	FALSE	FALSE	FALSE	FALSE	FALSE
YER170W	-0.540568	1.848	1.36257	0.584963	0.263034	-0.447459	FALSE	FALSE	FALSE	FALSE	TRUE	FALSE
YER171W	0.925999	1	1.26303	1.58496	0.192645	1.41504	FALSE	FALSE	FALSE	FALSE	FALSE	FALSE
YER172C	0.857981	0.758992	1.72583	1.41504	2.10434	0.807355	FALSE	FALSE	FALSE	FALSE	FALSE	FALSE
YER173W	-1.09954	-1.87447	0.125531	-0.415037	0.395929	-0.152003	FALSE	FALSE	FALSE	FALSE	FALSE	FALSE
YER174C	-2.16993	-0.415037	-0.893085	-1.80735	-0.70044	-1.87447	FALSE	FALSE	FALSE	FALSE	FALSE	FALSE
YER175C	-0.192645	2	1.87447	1.32193	0	-0.192645	FALSE	FALSE	FALSE	FALSE	FALSE	FALSE
YER175W-A	NA	-2	0	NA	0	-0.584963	FALSE	FALSE	FALSE	FALSE	FALSE	FALSE
YER176W	2.22239	-2	1.66297	1.41504	2.49185	0.514573	FALSE	FALSE	FALSE	FALSE	FALSE	FALSE
YER177W	0.033423	-0.24157	0.255199	-0.32022	0.310095	-0.167814	TRUE	TRUE	TRUE	TRUE	TRUE	TRUE
YER178W	0.0242475	0.624491	0.39776	1.20163	0.86821	0.830075	TRUE	TRUE	TRUE	TRUE	TRUE	TRUE
YER179W	NA	1	NA	NA	1.58496	0	FALSE	FALSE	FALSE	FALSE	FALSE	FALSE
YER179W	NA	NA	NA	NA	NA	NA	FALSE	FALSE	FALSE	FALSE	FALSE	FALSE
YER180C	0.447459	0.29956	0.514573	1.32193	0.765535	-1	TRUE	FALSE	FALSE	FALSE	FALSE	FALSE
YER180C-A	0.415037	0.652077	0.395929	1.45943	0.750022	0.180572	TRUE	FALSE	FALSE	FALSE	TRUE	FALSE
YER182W	0.0874628	0.0430687	0.874469	0.0931094	1.26303	0.273018	FALSE	TRUE	FALSE	FALSE	TRUE	TRUE
YER183C	NA	NA	-4.70044	NA	NA	NA	FALSE	FALSE	FALSE	FALSE	FALSE	FALSE
YER184C	-1.16993	-1.16993	-1.47393	-0.736966	-2.07039	-2.80735	FALSE	FALSE	FALSE	FALSE	FALSE	FALSE
YER185W	-1.67807	-2.58496	-1.45943	-2.80735	-1.08746	0.584963	FALSE	FALSE	FALSE	FALSE	FALSE	FALSE
YER186C	0.201634	0.459432	-1.1375	1	-0.678072	0	TRUE	FALSE	FALSE	FALSE	FALSE	FALSE
YER187W	NA	NA	-1	NA	-1	NA	FALSE	FALSE	FALSE	FALSE	FALSE	FALSE
YER188C-A	NA	0.584963	-2.32193	-0.584963	0	NA	FALSE	FALSE	FALSE	FALSE	FALSE	FALSE
YER189W	NA	NA	NA	NA	NA	NA	FALSE	FALSE	FALSE	FALSE	FALSE	FALSE
YER190W	-2.16993	-1.32193	-1.39232	-0.678072	-1.152	-2.41504	FALSE	FALSE	FALSE	FALSE	FALSE	FALSE
YER190C-B	NA	NA	NA	NA	NA	NA	FALSE	FALSE	FALSE	FALSE	FALSE	FALSE
YFL068W	NA	NA	NA	NA	NA	NA	FALSE	FALSE	FALSE	FALSE	FALSE	FALSE
YFL067W	NA	NA	NA	NA	NA	NA	FALSE	FALSE	FALSE	FALSE	FALSE	FALSE
YFL066C	NA	NA	NA	NA	NA	NA	FALSE	FALSE	FALSE	FALSE	FALSE	FALSE
YFL065C	1.12338	1.5025	0.842459	0.275634	0.830075	1.39855	TRUE	FALSE	TRUE	FALSE	TRUE	FALSE
YFL064C	NA	NA	NA	NA	NA	NA	FALSE	FALSE	FALSE	FALSE	FALSE	FALSE
YFL062W	NA	NA	NA	NA	NA	NA	FALSE	FALSE	FALSE	FALSE	FALSE	FALSE
YFL061W	NA	NA	-0.584963	NA	NA	NA	FALSE	FALSE	FALSE	FALSE	FALSE	FALSE
YFL060C	-0.263034	-0.584963	0.874469	-1	0.321928	1	FALSE	FALSE	FALSE	FALSE	FALSE	FALSE
YFL059W	-1.32193	-1.16993	-1.45943	NA	-1.22239	-2.58496	FALSE	FALSE	FALSE	FALSE	FALSE	FALSE
YFL058W	NA	NA	NA	NA	NA	NA	FALSE	FALSE	FALSE	FALSE	FALSE	FALSE
YFL057C	0.251539	-0.152003	0.241008	-0.289507	0.807355	-0.777608	TRUE	FALSE	FALSE	FALSE	FALSE	FALSE
YFL056C	-2.80735	NA	-1	NA	-0.584963	NA	FALSE	FALSE	FALSE	FALSE	FALSE	FALSE
YFL055W	NA	-1.32193	1.58496	0.415037	0	-1	FALSE	FALSE	FALSE	FALSE	FALSE	FALSE
YFL054C	-1.87447	0.469485	0.321928	-1.58496	-0.321928	0.106915	FALSE	FALSE	FALSE	FALSE	FALSE	FALSE
YFL053W	NA	NA	NA	NA	NA	NA	FALSE	FALSE	FALSE	FALSE	FALSE	FALSE
YFL052W	NA	NA	NA	0	NA	1	FALSE	FALSE	FALSE	FALSE	FALSE	FALSE
YFL051C	NA	NA	NA	NA	NA	NA	FALSE	FALSE	FALSE	FALSE	FALSE	FALSE
YFL050C	0.736966	-2	-1	NA	NA	NA	FALSE	FALSE	FALSE	FALSE	FALSE	FALSE
YFL049W	-1.85798	-3.52356	-1.67807	-1.80735	-2.03562	-2.63227	FALSE	FALSE	FALSE	FALSE	FALSE	FALSE
YFL048C	0	2	0.263034	-1	0	-0.807355	FALSE	FALSE	FALSE	FALSE	FALSE	FALSE
YFL047W	-1.90689	-1.87447	-1.94753	-2.16993	-3.67243	-2.32193	FALSE	FALSE	FALSE	FALSE	FALSE	FALSE
YFL046W	0.163499	0.485427	1.96347	2.22239	1.33121	1.66985	TRUE	FALSE	TRUE	FALSE	TRUE	FALSE
YFL045C	0.469485	0.125531	0.201634	1.90689	-0.0544478	0.0740006	FALSE	FALSE	TRUE	FALSE	TRUE	FALSE
YFL044C	0	-0.263034	0.0874628	-0.874469	0.275634	0.621488	FALSE	FALSE	FALSE	FALSE	FALSE	FALSE
YFL042C	1.03653	0.286304	1.90689	1.45943	1.15843	0.675565	TRUE	TRUE	TRUE	TRUE	TRUE	TRUE
YFL041W-A	1	-1.58496	NA	NA	NA	1.32193	FALSE	FALSE	FALSE	FALSE	FALSE	FALSE
YFL041W	1	1.16993	1.89308	1.08746	2.45943	0.917538	FALSE	FALSE	FALSE	FALSE	FALSE	FALSE
YFL040W	NA	NA	NA	NA	NA	NA	FALSE	FALSE	FALSE	FALSE	FALSE	FALSE
YFL039C	0.397592	-0.237039	0.046921	-0.501194	0.435095	0.232363	TRUE	TRUE	TRUE	TRUE	TRUE	TRUE
YFL039C	NA	NA	NA	NA	NA	NA	FALSE	FALSE	FALSE	FALSE	FALSE	FALSE
YFL038C	-0.126912	0.0946369	0.171187	0.889817	0.457473	-0.0108883	TRUE	TRUE	TRUE	TRUE	TRUE	TRUE
YFL037W	-0.186413	-0.395929	-0.293731	-1.47393	-0.5025	-0.347923	TRUE	FALSE	TRUE	FALSE	TRUE	TRUE
YFL036W	-0.494765	0.0614005	0.253757	-0.4975	-0.544321	-0.455679	TRUE	TRUE	TRUE	FALSE	TRUE	TRUE
YFL034C-B	-0.953457	-1.55459	-0.278535	-1.1481	0.114712	-0.853159	TRUE	TRUE	TRUE	TRUE	TRUE	TRUE
YFL034C-B	NA	NA	NA	NA	NA	NA	FALSE	FALSE	FALSE	FALSE	FALSE	FALSE
YFL034C-A	0.503433	0.38109	1.22239	1.40054	1.18145	1.04891	TRUE	TRUE	TRUE	TRUE	TRUE	TRUE
YFL034C-A	NA	NA	NA	NA	NA	NA	FALSE	FALSE	FALSE	FALSE	FALSE	FALSE
YFL034W	-0.431716	-0.106915	-0.158698	0	-0.878694	0.148099	TRUE	TRUE	TRUE	TRUE	TRUE	TRUE
YFL033C	0.736966	-1.16993	0.459432	0	-0.125531	-0.0995357	FALSE	FALSE	FALSE	FALSE	FALSE	FALSE
YFL031W	-1.21244	0.229552	-1.78436	-0.21818	-1.46113	0.306234	TRUE	TRUE	TRUE	TRUE	TRUE	TRUE
YFL031W	NA	NA	NA	NA	NA	NA	FALSE	FALSE	FALSE	FALSE	FALSE	FALSE
YFL030W	NA	-3.32193	-1	0	-2	-2.32193	FALSE	FALSE	FALSE	FALSE	FALSE	FALSE
YFL029C	3.04439	1.76553	1.25154	1.38702	1.94486	1.95109	FALSE	FALSE	TRUE	FALSE	TRUE	FALSE
YFL028C	-1.32193	-0.584963	0.152003	0	-1.37851	-0.807355	FALSE	FALSE	FALSE	FALSE	FALSE	FALSE
YFL027C	-1.08746	1.45943	-0.415037	1	-0.0874628	-0.125531	FALSE	FALSE	FALSE	FALSE	FALSE	FALSE
YFL026W	0.909802	0.476438	1.63227	2.2854	1.26849	2.04182	TRUE	TRUE	TRUE	FALSE	TRUE	FALSE
YFL025C	0.415037	-1	0.263034	1.58496	0.485427	0.321928	FALSE	FALSE	FALSE	FALSE	FALSE	FALSE
YFL024C	-1.42884	-1.09954	-1.6477	-1.58496	-1.48187	-1.58496	FALSE	FALSE	FALSE	FALSE	TRUE	FALSE
YFL023W	-1.37197	-3.16993	-1.12199	NA	-0.0524674	-1	FALSE	FALSE	FALSE	FALSE	TRUE	FALSE
YFL022C	-1.58496	-2	-2.07039	-3.16993	-2.5025	-2.41504	FALSE	FALSE	FALSE	FALSE	FALSE	FALSE
YFL021W	0	-0.222392	0	1.41504	2.32193	-0.710493	FALSE	FALSE	FALSE	FALSE	FALSE	FALSE
YFL020C	0.807355	-0.263034	-3.58496	1	0	2	FALSE	FALSE	FALSE	FALSE	FALSE	FALSE
YFL018C	-1.30485	-0.478047	-1.45372	-1.53051	-1.32193	-1.152	FALSE	TRUE	TRUE	FALSE	TRUE	TRUE
YFL017W-A	1.44361	0.91427	1.79355	1.49185	1.57374	1.53051	TRUE	TRUE	TRUE	FALSE	TRUE	TRUE
YFL017C	-0.0291463	-0.857981	0.215013	-0.485427	0.491853	-0.533432	TRUE	FALSE	TRUE	FALSE	TRUE	TRUE
YFL016C	0.540568	-0.133267	0.385654	-0.154723	0.954196	0.477579	TRUE	TRUE	TRUE	TRUE	TRUE	TRUE
YFL014W	-1.31264	-0.905849	-0.569915	-0.899744	-0.634068	-0.840578	TRUE	TRUE	TRUE	TRUE	TRUE	TRUE
YFL013C	0.263034	1	1.22239	2.11548	1.0614	1.85798	TRUE	FALSE	FALSE	FALSE	TRUE	FALSE
YFL012W	NA	NA	NA	NA	NA	NA	FALSE	FALSE	FALSE	FALSE	FALSE	FALSE
YFL011W	NA	NA	NA	NA	NA	NA	FALSE	FALSE	FALSE	FALSE	FALSE	FALSE
YFL010W-A	NA	NA	NA	NA	NA	NA	FALSE	FALSE	FALSE	FALSE	FALSE	FALSE
YFL010C	-1.32193	-0.370368	-0.445032	-0.594008	-0.10343	-0.246161	TRUE	TRUE	TRUE	TRUE	TRUE	TRUE
YFL009W	-0.754888	-2.24793	0.547488	-0.36257	0	-1.078	FALSE	FALSE	FALSE	FALSE	TRUE	FALSE
YFL008W	2.58496	1.41504	1.83007	0	1.80735	1.1375	FALSE	FALSE	FALSE	FALSE	FALSE	FALSE
YFL007W	-0.847997	-0.473931	0.459432	1.32193	0.758992	1.05889	TRUE	FALSE	TRUE	FALSE	TRUE	TRUE
YFL005W	-0.520832	0.836501	1.02975	0.70044	-0.163499	0.241008	TRUE	FALSE	TRUE	FALSE	TRUE	TRUE
YFL004W	-0.222392	-0.447459	0.289507	0	0	0.847997	FALSE	FALSE	FALSE	FALSE	TRUE	FALSE
YFL003C	NA	NA	NA	NA	NA	NA	FALSE	FALSE	FALSE	FALSE	FALSE	FALSE
YFL002C	-1.09954	-0.807355	-1.13124	-2.45943	-1.1635	-1	TRUE	FALSE	TRUE	FALSE	TRUE	FALSE
YFL001W	-4.12928	-4.24793	-1.62803	-4.24793	-2.43741	-4.24793	FALSE	FALSE	FALSE	FALSE	FALSE	FALSE
YFR001W	0.311944	0	0.0740006	0.584963	0	0.0931094	TRUE	FALSE	TRUE	FALSE	TRUE	FALSE
YFR002W	-0.862496	-2.45943	-0.540568	-0.222392	-0.201634	0	FALSE	FALSE	FALSE	FALSE	TRUE	FALSE
YFR003C	-1.93411	-1.10825	-1.12711	-0.949374	-1.10309	-0.89812	TRUE	TRUE	TRUE	TRUE	TRUE	TRUE
YFR004W	0.432111	0.452512	0.962847	-0.209453	0.855052	0.403356	TRUE	TRUE	TRUE	TRUE	TRUE	TRUE
YFR005C	-1	-2	-1.90689	-2.80735	-1	NA	FALSE	FALSE	FALSE	FALSE	FALSE	FALSE
YFR006W	-2.80735	0.263034	1.11548	-1	0.169925	0.584963	FALSE	FALSE	FALSE	FALSE	FALSE	FALSE
YFR007W	0.415037	0.415037	-2.16993	0	0.584963	-2.45943	FALSE	FALSE	FALSE	FALSE	FALSE	FALSE
YFR008W	1.16993	0.321928	0.70044	0	1.16993	1.66297	FALSE	TRUE	FALSE	FALSE	FALSE	FALSE
YFR009W	-0.750022	0.169925	-0.152003	1.22239	0.798366	-0.295456	TRUE	FALSE	TRUE	FALSE	TRUE	TRUE
YFR010W	-0.0943274	-0.577976	0.331206	-1.04026	-0.0120728	-0.724765	TRUE	TRUE	TRUE	TRUE	TRUE	TRUE
YFR011C	-0.612977	-0.830075	0.263034	-0.862496	-0.321928	-0.321928	FALSE	FALSE	TRUE	FALSE	TRUE	TRUE
YFR012W	NA	NA	NA	NA	NA	NA	FALSE	FALSE	FALSE	FALSE	FALSE	FALSE
YFR012W-A	NA	NA	-1	NA	NA	NA	FALSE	FALSE	FALSE	FALSE	FALSE	FALSE
YFR013W	0	0.459432	0.415037	1.58496	0.0995357	0.0931094	FALSE	FALSE	FALSE	FALSE	FALSE	FALSE
YFR014C	-0.125531	-0.550197	0	-0.830075	0.131245	-0.83399	TRUE	TRUE	FALSE	FALSE	TRUE	TRUE
YFR015C	0	-0.125531	-0.70044	0.222392	-0.874469	0.0861566	FALSE	TRUE	FALSE	TRUE	FALSE	TRUE
YFR016C	-0.321928	0.0931094	0.378512	0.347923	-0.241008	0.206451	FALSE	FALSE	FALSE	FALSE	FALSE	FALSE
YFR017C	-1.28011	0.27208	-0.160465	0.249978	1.06413	0.850253	FALSE	TRUE	FALSE	TRUE	FALSE	TRUE
YFR018C	2.27302	2.41504	2.42626	-0.485427	1.86507	1.10692	FALSE	FALSE	FALSE	FALSE	FALSE	FALSE
YFR019W	-3.3147	-3.43155	-3.06916	-3.52356	-3.53398	-3.74211	TRUE	FALSE	TRUE	FALSE	TRUE	TRUE
YFR021W	-0.485427	-2	-1	-2.58496	-0.70044	-1.16993	FALSE	FALSE	FALSE	FALSE	FALSE	FALSE
YFR022W	-1.04182	-0.678072	-0.559427	-0.36257	-0.295456	-0.36257	FALSE	FALSE	FALSE	FALSE	TRUE	TRUE
YFR023W	NA	NA	NA	NA	NA	NA	FALSE	FALSE	FALSE	FALSE	FALSE	FALSE
YFR024C-A	-1.26303	-1	-1.11548	-0.678072	-1.22239	-1.41504	FALSE	FALSE	FALSE	FALSE	FALSE	FALSE
YFR024C-A	NA	NA	NA	NA	NA	NA	FALSE	FALSE	FALSE	FALSE	FALSE	FALSE
YFR025C	1.078	3.58496	1.38702	0.830075	1.87447	1.80735	FALSE	FALSE	FALSE	FALSE	FALSE	FALSE
YFR026C	0.777608	-0.36257	0.137504	-0.415037	1.19265	1	FALSE	FALSE	FALSE	FALSE	FALSE	FALSE
YFR027W	0.152003	-0.415037	0	NA	-0.893085	2.45943	FALSE	FALSE	FALSE	FALSE	FALSE	FALSE
YFR028C	1.29956	0.387023	0.353637	2.80735	1.66985	-0.415037	FALSE	FALSE	FALSE	FALSE	FALSE	FALSE
YFR029W	1.58496	-0.415037	-0.321928	-0.321928	0	-0.415037	FALSE	FALSE	FALSE	FALSE	FALSE	FALSE
YFR030W	1.48543	0.893085	1.32193	1	1.54749	0.222392	FALSE	FALSE	FALSE	FALSE	FALSE	FALSE
YFR031C	-1.32193	1	2.32193	0.736966	0.584963	1	FALSE	FALSE	FALSE	FALSE	FALSE	FALSE
YFR031C-A	0.690403	1	0.742903	0.973528	0.819151	1.04963	TRUE	TRUE	TRUE	TRUE	TRUE	TRUE
YFR031C-A	NA	NA	NA	NA	NA	NA	FALSE	FALSE	FALSE	FALSE	FALSE	FALSE
YFR032C	NA	-1	-1	NA	NA	NA	FALSE	FALSE	FALSE	FALSE	FALSE	FALSE
YFR032C-A	-4.44626	-5.83289	-5.37504	NA	-5.93074	-4.9386	FALSE	FALSE	FALSE	FALSE	FALSE	FALSE
YFR032C-B	NA	NA	NA	NA	NA	NA	FALSE	FALSE	FALSE	FALSE	FALSE	FALSE
YFR033C	-0.402437	-0.503021	-0.645198	-0.649093	-0.593923	-0.489966	TRUE	TRUE	TRUE	TRUE	TRUE	TRUE
YFR034C	0.483209	0.115477	1.23078	1.87447	1.01937	1.02857	TRUE	TRUE	TRUE	FALSE	TRUE	TRUE
YFR035C	NA	0	-1	NA	NA	2.32193	FALSE	FALSE	FALSE	FALSE	FALSE	FALSE
YFR036W	0.780687	0.353637	1.47805	0.552541	0.910203	0.0418202	TRUE	FALSE	TRUE	FALSE	TRUE	TRUE
YFR037C	0.471824	1.21057	1.30753	1.05063	1.33985	0.632268	TRUE	TRUE	TRUE	TRUE	TRUE	TRUE
YFR038W	-2.58496	-1.32193	-2.45943	-3.58496	-3.23704	-2.32193	FALSE	FALSE	FALSE	FALSE	FALSE	FALSE
YFR039C	-1.45943	-0.192645	-0.514573	-0.263034	0.440573	-0.63743	FALSE	FALSE	FALSE	FALSE	FALSE	FALSE
YFR040W	0.584963	0.95109	0.304855	0.807355	0.938599	0.476438	FALSE	FALSE	FALSE	FALSE	FALSE	TRUE
YFR041C	0.652077	-1.22239	1.22239	1.58496	0.900464	0.485427	FALSE	FALSE	FALSE	FALSE	FALSE	FALSE
YFR042W	3.08746	2.45943	1.87447	1	0.736966	2.70044	FALSE	FALSE	FALSE	FALSE	FALSE	FALSE
YFR043C	-0.584963	1	-2.45943	1.32193	-1	1.22239	FALSE	FALSE	FALSE	FALSE	FALSE	FALSE
YFR044C	0.691878	-0.514573	-0.192645	-0.678072	0.925999	-1.36257	FALSE	FALSE	FALSE	FALSE	FALSE	FALSE
YFR045W	NA	0.321928	0.874469	1.67807	0.530515	0.192645	FALSE	FALSE	FALSE	FALSE	FALSE	FALSE
YFR045W	NA	NA	NA	NA	NA	NA	FALSE	FALSE	FALSE	FALSE	FALSE	FALSE
YFR046C	-2.19265	-2.07039	-2.4021	NA	-2.32193	-2.52356	FALSE	FALSE	FALSE	FALSE	FALSE	FALSE
YFR047C	-0.906891	-1.58496	-2.27302	-2.07039	-0.95109	-0.378512	FALSE	FALSE	FALSE	FALSE	FALSE	FALSE
YFR048W	0.201634	-0.459432	2.5502	2.11548	1.4245	1.63227	TRUE	FALSE	FALSE	FALSE	FALSE	FALSE
YFR049W	0.472068	0.661198	1.02466	0.868755	0.5025	1	TRUE	TRUE	TRUE	TRUE	TRUE	TRUE
YFR050C	1.38565	0.882643	2.31288	1.1635	2.04836	1.4021	TRUE	TRUE	TRUE	TRUE	TRUE	TRUE
YFR051C	0.308122	-0.222392	0.825971	0.63743	0.807355	0.452512	TRUE	FALSE	TRUE	FALSE	TRUE	FALSE
YFR052W	1.2303	0.863679	1.48904	1.09433	1.5502	0.89812	TRUE	TRUE	TRUE	TRUE	TRUE	TRUE
YFR053C	-1.7885	-1.33593	-1.92961	-1.22239	-1.49643	-1	FALSE	TRUE	TRUE	TRUE	TRUE	TRUE
YFR055W	-0.514573	-0.584963	0.222392	2	-1	0	FALSE	FALSE	FALSE	FALSE	FALSE	FALSE
YFR057W	NA	NA	NA	NA	NA	NA	FALSE	FALSE	FALSE	FALSE	FALSE	FALSE
YGL263W	NA	NA	-2	NA	-0.584963	NA	FALSE	FALSE	FALSE	FALSE	FALSE	FALSE
YGL262W	NA	NA	NA	NA	NA	NA	FALSE	FALSE	FALSE	FALSE	FALSE	FALSE
YGL261C	NA	NA	NA	NA	0	NA	FALSE	FALSE	FALSE	FALSE	FALSE	FALSE
YGL260W	NA	NA	NA	NA	NA	NA	FALSE	FALSE	FALSE	FALSE	FALSE	FALSE
YGL259W	NA	NA	NA	NA	NA	0	FALSE	FALSE	FALSE	FALSE	FALSE	FALSE
YGL258W-A	NA	NA	NA	-1.32193	0	-0.584963	FALSE	FALSE	FALSE	FALSE	FALSE	FALSE
YGL258W	NA	NA	NA	NA	1	NA	FALSE	FALSE	FALSE	FALSE	FALSE	FALSE
YGL257C	0	-1.32193	1	NA	-0.321928	-0.807355	FALSE	FALSE	FALSE	FALSE	FALSE	FALSE
YGL256W	-2.80735	NA	0.222392	NA	0.874469	-1.45943	FALSE	FALSE	FALSE	FALSE	FALSE	FALSE
YGL255W	1.41093	1.24793	1.70044	1.80735	1.46395	1.53605	TRUE	FALSE	TRUE	FALSE	TRUE	FALSE
YGL254W	-1	-0.736966	0.523562	-1.66297	-1.8365	-0.459432	FALSE	FALSE	FALSE	FALSE	FALSE	FALSE
YGL253W	-0.0506261	-0.514573	-0.527932	-0.347923	0.173332	-0.222392	TRUE	TRUE	TRUE	TRUE	TRUE	TRUE
YGL252C	1.58496	1	0.662965	-0.36257	1.58496	1.58496	FALSE	FALSE	FALSE	FALSE	FALSE	FALSE
YGL251C	NA	NA	1.58496	NA	NA	1.58496	FALSE	FALSE	FALSE	FALSE	FALSE	FALSE
YGL251C	NA	NA	NA	NA	NA	NA	FALSE	FALSE	FALSE	FALSE	FALSE	FALSE
YGL250W	-4.08746	-2.90689	-2	-1.87447	-1.32193	-0.893085	FALSE	FALSE	FALSE	FALSE	FALSE	FALSE
YGL249W	NA	NA	-1	NA	NA	NA	FALSE	FALSE	FALSE	FALSE	FALSE	FALSE
YGL248W	-1.8365	-1.96347	-1.04731	-1.67807	-1.43296	-2.1375	FALSE	FALSE	FALSE	FALSE	FALSE	FALSE
YGL247W	-1.20163	-1.73697	-1.58496	-1.32193	-1.58496	-0.415037	FALSE	FALSE	FALSE	FALSE	FALSE	FALSE
YGL246C	-2.90689	-1.80735	-0.893085	-1	0	0.584963	FALSE	FALSE	FALSE	FALSE	FALSE	FALSE
YGL245W	0.0554951	0.61891	1.22239	0.929611	1.32931	0.878694	TRUE	TRUE	TRUE	TRUE	TRUE	TRUE
YGL244W	0.0317089	-0.241008	0.321928	0.752072	0.799087	0.584963	TRUE	TRUE	TRUE	FALSE	TRUE	TRUE
YGL243W	-3.16993	NA	-4.16993	NA	-4.58496	-3.32193	FALSE	FALSE	FALSE	FALSE	FALSE	FALSE
YGL242C	-1.45251	-1.75489	-1.56704	-3.03562	-1.12832	-1.54749	FALSE	FALSE	TRUE	FALSE	TRUE	TRUE
YGL241W	NA	NA	0	NA	-0.415037	NA	FALSE	FALSE	FALSE	FALSE	FALSE	FALSE
YGL240W	0	-1.22239	1.16993	0.807355	-0.415037	1.58496	FALSE	FALSE	FALSE	FALSE	FALSE	FALSE
YGL238W	0.321928	-0.321928	1	0	0.304855	-0.947533	FALSE	FALSE	FALSE	FALSE	FALSE	FALSE
YGL237C	-1.926	-0.222392	0.392317	-0.793549	-0.392317	0.180572	FALSE	TRUE	FALSE	FALSE	FALSE	TRUE
YGL236C	-0.652077	1	-0.289507	NA	-0.540568	NA	FALSE	FALSE	FALSE	FALSE	FALSE	FALSE
YGL235W	NA	NA	NA	NA	NA	1	FALSE	FALSE	FALSE	FALSE	FALSE	FALSE
YGL234W	0.0759489	-0.321928	-0.192645	0.304855	0.38109	0.199309	TRUE	TRUE	TRUE	FALSE	TRUE	TRUE
YGL233W	1.87447	1.16993	1	4	1.16993	0.678072	FALSE	FALSE	FALSE	FALSE	FALSE	FALSE
YGL232W	-1.41504	-4.45943	-0.222392	-2.32193	-0.719892	-0.530515	FALSE	FALSE	FALSE	FALSE	FALSE	FALSE
YGL232W	NA	NA	NA	NA	NA	NA	FALSE	FALSE	FALSE	FALSE	FALSE	FALSE
YGL231C	-1.33442	-1.39855	-1.39232	-2.06413	-1.62803	-1.11103	TRUE	FALSE	TRUE	FALSE	TRUE	TRUE
YGL230C	NA	NA	NA	NA	NA	NA	FALSE	FALSE	FALSE	FALSE	FALSE	FALSE
YGL229C	NA	-1	NA	-1.80735	-1	-0.874469	FALSE	FALSE	FALSE	FALSE	FALSE	FALSE
YGL228W	3.08746	1.28951	2.66297	2.07039	2	1.05445	FALSE	FALSE	FALSE	FALSE	FALSE	FALSE
YGL227W	2.16993	1.80735	1.71621	1.70044	1.73697	2.52356	FALSE	FALSE	FALSE	FALSE	FALSE	FALSE
YGL226C-A	0.415037	-0.125531	0.510962	1.36923	0.802963	0.791413	TRUE	TRUE	TRUE	FALSE	TRUE	TRUE
YGL226C-A	NA	NA	NA	NA	NA	NA	FALSE	FALSE	FALSE	FALSE	FALSE	FALSE
YGL226W	-1.848	-3.90689	-2.32193	-1.70044	-2.73039	-2.80735	FALSE	FALSE	FALSE	FALSE	FALSE	FALSE
YGL225W	-0.893085	0	1.08746	-1	0.0995357	-1.32193	FALSE	FALSE	FALSE	FALSE	FALSE	FALSE
YGL224C	-1.37851	-0.263034	-1.16993	-2.32193	-0.758992	-0.678072	FALSE	FALSE	FALSE	FALSE	FALSE	FALSE
YGL223C	-0.392317	-0.874469	-0.214125	0.115477	-1	-1.62149	FALSE	FALSE	TRUE	FALSE	FALSE	FALSE
YGL222C	-0.853159	-1.44294	-0.880853	-0.387023	-1.41504	-0.745071	TRUE	TRUE	TRUE	TRUE	TRUE	TRUE
YGL221C	-1.19465	-1.43494	-1.35252	-1.45251	-1.02466	-1.23816	TRUE	TRUE	TRUE	FALSE	TRUE	TRUE
YGL220W	NA	1	NA	NA	NA	NA	FALSE	FALSE	FALSE	FALSE	FALSE	FALSE
YGL219C	0.169925	0.378512	1.16046	-0.106915	1.14684	0.415037	FALSE	FALSE	FALSE	FALSE	FALSE	FALSE
YGL216W	-1	-1.32193	-1.58496	-2.32193	0.222392	-0.289507	FALSE	FALSE	FALSE	FALSE	FALSE	FALSE
YGL215W	-1.77052	-1.58496	-1.32193	-1.42884	-1.49476	-0.536053	FALSE	FALSE	FALSE	FALSE	TRUE	TRUE
YGL213C	2.16993	0.807355	1.28011	3.58496	2.24793	1.91754	FALSE	FALSE	FALSE	FALSE	FALSE	FALSE
YGL212W	NA	NA	-1.58496	0	-2.90689	NA	FALSE	FALSE	FALSE	FALSE	FALSE	FALSE
YGL211W	0.523562	0.152003	0.807355	1	1.39232	1	FALSE	FALSE	FALSE	FALSE	FALSE	FALSE
YGL210W	0.893085	0.932886	1.29373	-0.263034	0.899071	0.29956	TRUE	FALSE	TRUE	FALSE	TRUE	TRUE
YGL209W	0.0515303	-0.747234	0.356935	-0.0740006	0.516791	0.454566	TRUE	TRUE	TRUE	FALSE	TRUE	TRUE
YGL208W	0.125531	0.584963	1.46949	1.82597	1.06711	1.58496	FALSE	TRUE	FALSE	FALSE	TRUE	FALSE
YGL207W	-1.50901	-0.704544	-1.02466	-0.616671	-0.358454	0.121991	TRUE	TRUE	TRUE	FALSE	TRUE	TRUE
YGL206C	-0.807355	-0.106915	0.378512	-0.678072	0.530515	0.14439	FALSE	FALSE	FALSE	FALSE	FALSE	FALSE
YGL205W	NA	1	NA	-1	1	NA	FALSE	FALSE	FALSE	FALSE	FALSE	FALSE
YGL203C	-1	-0.584963	0.485427	0	0.222392	0.736966	FALSE	FALSE	FALSE	FALSE	FALSE	FALSE
YGL202W	-0.0780025	0.247928	-0.0874628	0.63743	0.594008	0.304855	TRUE	TRUE	TRUE	FALSE	TRUE	TRUE
YGL201C	1.70044	0.893085	3.04439	3.36923	2.43741	1.87447	FALSE	FALSE	FALSE	FALSE	FALSE	FALSE
YGL200C	-0.23644	-0.0627358	0.364054	-0.257158	0.487446	-0.415037	TRUE	TRUE	TRUE	TRUE	TRUE	TRUE
YGL198W	-3.83007	-4.41954	-2.64599	-3.34577	-2.81497	-3.7625	FALSE	FALSE	TRUE	FALSE	TRUE	FALSE
YGL197W	0.628031	0.263034	-0.392317	-0.36257	0.247928	0.4975	FALSE	FALSE	FALSE	FALSE	FALSE	FALSE
YGL196W	0.807355	0.893085	0.777608	0.678072	-1.58496	1.41504	FALSE	FALSE	FALSE	FALSE	FALSE	FALSE
YGL195W	0.559427	0.137504	1.91754	-1.58496	2.16993	0.710493	FALSE	FALSE	FALSE	FALSE	FALSE	FALSE
YGL194C-A	-1.26303	2.80735	-0.263034	1.32193	-0.530515	0.415037	FALSE	FALSE	FALSE	FALSE	FALSE	FALSE
YGL194C	-0.415037	-0.415037	-0.241008	1	0	0.710493	FALSE	FALSE	FALSE	FALSE	FALSE	FALSE
YGL193C	0.0931094	-1.16993	0.321928	0.485427	-0.847997	0	FALSE	FALSE	FALSE	FALSE	FALSE	FALSE
YGL192W	NA	NA	NA	NA	NA	NA	FALSE	FALSE	FALSE	FALSE	FALSE	FALSE
YGL191W	-0.893085	-1.12199	-0.321928	-0.5025	-0.678072	-0.980891	FALSE	FALSE	TRUE	TRUE	TRUE	TRUE
YGL190C	-0.568284	0.142019	-0.321928	-0.0614005	-0.669851	0.341037	TRUE	TRUE	TRUE	TRUE	TRUE	TRUE
YGL189C	-5.68531	-6.07007	-6.16432	-7.20294	-6.43414	-6.65216	TRUE	TRUE	TRUE	FALSE	TRUE	TRUE
YGL188C-A	-0.170086	0.00623734	-0.2729	-0.111093	-0.204	-0.150061	TRUE	TRUE	TRUE	TRUE	TRUE	TRUE
YGL187C	-2.926	-2.37851	-3	-2.39232	-4.9542	-1.85798	FALSE	FALSE	FALSE	FALSE	FALSE	FALSE
YGL186C	0.131245	-1	0.584963	-2	0.304855	-0.241008	TRUE	FALSE	FALSE	FALSE	FALSE	FALSE
YGL185C	2.32193	1.90689	3.41504	1.80735	2.32193	2.20945	FALSE	FALSE	FALSE	FALSE	FALSE	FALSE
YGL184C	-0.157541	1	0.0962153	0	1.06413	1.32193	TRUE	FALSE	TRUE	FALSE	TRUE	FALSE
YGL183C	-0.847997	0.584963	-0.736966	0	0	NA	FALSE	FALSE	FALSE	FALSE	FALSE	FALSE
YGL183C	NA	NA	NA	NA	NA	NA	FALSE	FALSE	FALSE	FALSE	FALSE	FALSE
YGL181W	1.22239	0	-0.321928	2	0.514573	0	FALSE	FALSE	FALSE	FALSE	FALSE	FALSE
YGL180W	-1	1.1375	0.280108	-0.874469	-0.0931094	0.459432	FALSE	FALSE	FALSE	FALSE	FALSE	FALSE
YGL179C	0.415037	-3	0	NA	0	NA	FALSE	FALSE	FALSE	FALSE	FALSE	FALSE
YGL178W	-1.04731	-1.58496	-2.08746	-1.848	-2.04439	-1.66297	FALSE	FALSE	FALSE	FALSE	FALSE	FALSE
YGL178W	NA	NA	NA	NA	NA	NA	FALSE	FALSE	FALSE	FALSE	FALSE	FALSE
YGL176C	1.16993	2.22239	2.08746	NA	3.08746	NA	FALSE	FALSE	FALSE	FALSE	FALSE	FALSE
YGL175C	2	2	2.16993	0	1.58496	1.58496	FALSE	FALSE	FALSE	FALSE	FALSE	FALSE
YGL174W	-0.222392	0.584963	-0.137504	-1	-1.24793	-0.36257	FALSE	FALSE	FALSE	FALSE	FALSE	FALSE
YGL173C	-0.494765	-0.156119	-0.520832	-0.793549	-0.91427	0.133267	TRUE	TRUE	TRUE	FALSE	TRUE	TRUE
YGL172W	3.05063	3.70044	1.47644	1.69032	1.47393	2.77529	FALSE	FALSE	TRUE	TRUE	TRUE	FALSE
YGL171W	1.1193	-0.321928	1.28951	1	1.49354	0.736966	TRUE	FALSE	TRUE	FALSE	TRUE	FALSE
YGL170C	NA	NA	NA	NA	0	NA	FALSE	FALSE	FALSE	FALSE	FALSE	FALSE
YGL169W	0	-1	-0.485427	-1	-1.73697	NA	FALSE	FALSE	FALSE	FALSE	FALSE	FALSE
YGL168W	NA	NA	NA	NA	NA	NA	FALSE	FALSE	FALSE	FALSE	FALSE	FALSE
YGL167C	0.698998	0.783189	0.146221	0.932886	0.859402	0.743225	TRUE	TRUE	TRUE	TRUE	TRUE	TRUE
YGL166W	-0.402098	-0.847997	-0.388565	-0.584963	-0.36257	0.296982	TRUE	FALSE	TRUE	FALSE	TRUE	TRUE
YGL164C	-0.847997	-0.584963	-0.5025	-0.222392	0.415037	-0.415037	FALSE	FALSE	FALSE	FALSE	FALSE	FALSE
YGL163C	0.398549	-1.8365	-0.632268	-2.73697	-0.669851	-2.08746	TRUE	FALSE	TRUE	FALSE	TRUE	FALSE
YGL162W	-0.782409	-0.106915	-0.118644	1.32193	0.234465	0.137504	TRUE	FALSE	TRUE	FALSE	TRUE	TRUE
YGL161C	-0.628031	-0.710493	-0.321928	-1.45943	-0.425306	-0.91427	TRUE	TRUE	TRUE	FALSE	TRUE	TRUE
YGL160W	2.32193	-0.321928	0.736966	0.415037	0.678072	0.485427	FALSE	FALSE	FALSE	FALSE	FALSE	FALSE
YGL159W	-2	-0.678072	-0.678072	-3	-1.26303	NA	FALSE	FALSE	FALSE	FALSE	FALSE	FALSE
YGL158W	-1	0.485427	0	0.652077	-1	0.289507	FALSE	FALSE	FALSE	FALSE	FALSE	FALSE
YGL157W	0.353637	-0.623437	-0.180572	-0.160465	0.643856	-0.0759489	FALSE	TRUE	FALSE	FALSE	FALSE	TRUE
YGL156W	0.584963	1.58496	0.917538	-0.485427	0.906891	2.24793	FALSE	FALSE	FALSE	FALSE	FALSE	FALSE
YGL155W	-0.347923	-0.192645	-1.08746	-0.584963	-1.58496	-1.87447	FALSE	FALSE	FALSE	FALSE	FALSE	FALSE
YGL154C	NA	-1.58496	NA	NA	NA	NA	FALSE	FALSE	FALSE	FALSE	FALSE	FALSE
YGL153W	1.84435	1.51937	2.44057	1.38702	2.17509	1.39593	TRUE	FALSE	TRUE	FALSE	TRUE	FALSE
YGL151W	0.893085	2.58496	2.05889	1.73697	1.28951	1.20645	FALSE	FALSE	FALSE	FALSE	FALSE	FALSE
YGL150C	0.878694	1.38466	1	0.415037	-0.228269	-0.176878	TRUE	FALSE	TRUE	FALSE	TRUE	TRUE
YGL148W	1.06817	0.434403	0.807355	0.510962	1.35527	1.4021	TRUE	TRUE	TRUE	TRUE	TRUE	TRUE
YGL147C	-0.00698643	0.936274	0.0354779	1.06774	0.530036	0.671119	TRUE	TRUE	TRUE	TRUE	TRUE	TRUE
YGL146C	1.80735	0.263034	1.22239	0.152003	-0.169925	1.32193	FALSE	FALSE	FALSE	FALSE	FALSE	FALSE
YGL145W	1.22239	-1.58496	-1.37851	-1.58496	1	0	FALSE	FALSE	FALSE	FALSE	FALSE	FALSE
YGL144C	0.63743	0	1	-1	0.884523	-0.152003	FALSE	FALSE	FALSE	FALSE	FALSE	FALSE
YGL143C	1.32193	1	2.70044	0.584963	1.05889	0.678072	FALSE	FALSE	FALSE	FALSE	FALSE	FALSE
YGL142C	-0.736966	0.485427	-0.736966	NA	0.321928	1.58496	FALSE	FALSE	FALSE	FALSE	FALSE	FALSE
YGL141W	-1	-0.932886	0.29956	-0.415037	-0.777608	-0.669851	TRUE	TRUE	TRUE	FALSE	TRUE	TRUE
YGL140C	-2.08746	-3.16993	-2.41504	-1.1375	-1.87447	-0.847997	FALSE	FALSE	FALSE	FALSE	FALSE	FALSE
[truncated: 4,057 more rows]

## Sheet: uSvsddS
gene	wt_0_uSvsddS	wt_30_uSvsddS	lsm1_0_uSvsddS	lsm1_30_uSvsddS	pat1_0_uSvsddS	pat1_30_uSvsddS	wt_0_uSvsddS_f	wt_30_uSvsddS_f	lsm1_0_uSvsddS_f	lsm1_30_uSvsddS_f	pat1_0_uSvsddS_f	pat1_30_uSvsddS_f
YAL068C	NA	NA	NA	NA	NA	NA	FALSE	FALSE	FALSE	FALSE	FALSE	FALSE
YAL067W-A	NA	NA	NA	NA	NA	NA	FALSE	FALSE	FALSE	FALSE	FALSE	FALSE
YAL067C	1	NA	NA	NA	NA	NA	FALSE	FALSE	FALSE	FALSE	FALSE	FALSE
YAL065C	NA	NA	NA	NA	NA	NA	FALSE	FALSE	FALSE	FALSE	FALSE	FALSE
YAL064W-B	NA	0	NA	0	NA	NA	FALSE	FALSE	FALSE	FALSE	FALSE	FALSE
YAL064C-A	NA	NA	NA	NA	NA	NA	FALSE	FALSE	FALSE	FALSE	FALSE	FALSE
YAL064W	NA	-1	NA	-1	NA	NA	FALSE	FALSE	FALSE	FALSE	FALSE	FALSE
YAL063C-A	NA	NA	NA	NA	NA	NA	FALSE	FALSE	FALSE	FALSE	FALSE	FALSE
YAL063C	NA	NA	NA	NA	NA	NA	FALSE	FALSE	FALSE	FALSE	FALSE	FALSE
YAL062W	NA	NA	0	NA	0	NA	FALSE	FALSE	FALSE	FALSE	FALSE	FALSE
YAL061W	0.450661	0.341037	1.02857	0.232661	1.23133	-0.0614005	TRUE	TRUE	TRUE	TRUE	TRUE	TRUE
YAL060W	1.32193	0.63743	1.37851	2.07039	1.11548	0.95109	FALSE	FALSE	FALSE	FALSE	FALSE	FALSE
YAL059W	NA	NA	-5.39232	-3.16993	NA	-3.58496	FALSE	FALSE	FALSE	FALSE	FALSE	FALSE
YAL058W	1	2.16993	1.58496	NA	4.08746	1.58496	FALSE	FALSE	FALSE	FALSE	FALSE	FALSE
YAL056W	-0.710493	1.1375	1.77761	1.16993	1.24793	1	FALSE	FALSE	FALSE	FALSE	FALSE	FALSE
YAL055W	-1.45943	0.485427	-0.263034	0	0.115477	0.584963	FALSE	FALSE	FALSE	FALSE	FALSE	FALSE
YAL054C	1	0	-0.736966	1	2.80735	0.584963	FALSE	FALSE	FALSE	FALSE	FALSE	FALSE
YAL053W	1.91754	0.347923	0.485427	0.736966	3.41504	1.63743	FALSE	FALSE	FALSE	FALSE	FALSE	FALSE
YAL051W	1.20645	0.395929	1.73697	1.88753	1.65208	1.75002	FALSE	FALSE	FALSE	FALSE	FALSE	FALSE
YAL049C	1.70044	0.447459	1.23266	-0.485427	1.72247	1	FALSE	FALSE	TRUE	FALSE	FALSE	FALSE
YAL048C	NA	NA	0	NA	NA	NA	FALSE	FALSE	FALSE	FALSE	FALSE	FALSE
YAL047C	2.32193	NA	1.32193	NA	NA	NA	FALSE	FALSE	FALSE	FALSE	FALSE	FALSE
YAL046C	0	NA	0	0	0	-2.32193	FALSE	FALSE	FALSE	FALSE	FALSE	FALSE
YAL044W-A	1.24393	0.819428	2.88264	1.36923	2.35199	0.569366	FALSE	FALSE	FALSE	FALSE	FALSE	TRUE
YAL044C	-0.415037	-0.70044	-1.078	-0.222392	-0.222392	-2	FALSE	FALSE	FALSE	FALSE	FALSE	FALSE
YAL043C	0.192645	1.22239	1.16993	2.58496	1.70044	1.08746	FALSE	FALSE	FALSE	FALSE	FALSE	FALSE
YAL042W	2.61143	2.21501	3.56682	3	3.34239	2	FALSE	FALSE	TRUE	FALSE	TRUE	TRUE
YAL041W	0.584963	0.736966	2.5025	1.32193	1.47393	0.70044	FALSE	FALSE	FALSE	FALSE	FALSE	FALSE
YAL040C	-0.222392	-0.678072	-0.847997	-0.530515	-0.440573	-0.70044	FALSE	FALSE	FALSE	FALSE	FALSE	FALSE
YAL039C	1.12338	0	1.07973	0.777608	0.937264	0.453718	TRUE	TRUE	TRUE	TRUE	TRUE	TRUE
YAL038W	0.189855	0.00513415	0.0354987	0.43948	0.271302	0.200511	TRUE	TRUE	TRUE	TRUE	TRUE	TRUE
YAL037C-A	NA	NA	NA	NA	NA	NA	FALSE	FALSE	FALSE	FALSE	FALSE	FALSE
YAL037W	1.58496	1.58496	1.58496	NA	0.736966	1.58496	FALSE	FALSE	FALSE	FALSE	FALSE	FALSE
YAL036C	1.58496	0.807355	1.66626	1.73697	1.926	1	FALSE	FALSE	TRUE	FALSE	TRUE	FALSE
YAL035W	0.809003	0.959358	1.853	1.31034	1.14719	0.924051	TRUE	TRUE	TRUE	TRUE	TRUE	TRUE
YAL034W-A	3.16993	1	2.80735	NA	1.73697	NA	FALSE	FALSE	FALSE	FALSE	FALSE	FALSE
YAL034C	-1	0.603341	0.187627	1.56242	-0.228269	1.46248	FALSE	TRUE	TRUE	TRUE	TRUE	TRUE
YAL033W	-1.16993	NA	-1.58496	0	-2	2.32193	FALSE	FALSE	FALSE	FALSE	FALSE	FALSE
YAL032C	0.490326	1.1375	1.12199	1.19794	1.5025	0.38109	TRUE	TRUE	TRUE	FALSE	TRUE	TRUE
YAL031C	3.70044	2.24793	2.32193	1.41504	3.11548	2.32193	FALSE	FALSE	FALSE	FALSE	FALSE	FALSE
YAL030W	0.887525	-0.0931094	0.53842	-0.378512	1.43741	0.14439	TRUE	TRUE	TRUE	TRUE	TRUE	TRUE
YAL030W	NA	NA	NA	NA	NA	NA	FALSE	FALSE	FALSE	FALSE	FALSE	FALSE
YAL029C	-1.05247	-0.851901	-1.32193	-1.926	-1.01381	-1.05184	TRUE	TRUE	TRUE	FALSE	TRUE	TRUE
YAL028W	0.63743	0.784271	0.584963	0.5025	0.206451	0.823122	FALSE	FALSE	FALSE	FALSE	FALSE	TRUE
YAL027W	NA	2.45943	2.70044	NA	2.58496	3.16993	FALSE	FALSE	FALSE	FALSE	FALSE	FALSE
YAL026C	0.415037	-0.584963	-1.58496	0.736966	-0.893085	-0.152003	FALSE	FALSE	FALSE	FALSE	FALSE	FALSE
YAL025C	1.65992	2.41504	2.10579	2.32193	2.64909	2.90689	TRUE	FALSE	TRUE	FALSE	TRUE	FALSE
YAL024C	-0.192645	1.58496	-0.485427	NA	1	0.263034	FALSE	FALSE	FALSE	FALSE	FALSE	FALSE
YAL023C	-0.467126	-1.54749	-0.946229	-1.67807	-0.649503	-1.09115	TRUE	FALSE	TRUE	FALSE	TRUE	TRUE
YAL022C	2.32193	1	1.62803	1.45943	2.62449	1.66297	FALSE	FALSE	FALSE	FALSE	FALSE	FALSE
YAL021C	0.08092	-1.1964	-0.146841	-0.770518	-0.22556	-1.29956	TRUE	TRUE	TRUE	FALSE	TRUE	TRUE
YAL020C	-0.793549	-1.53051	-1.5502	-1.51457	-0.747234	-0.523562	FALSE	FALSE	FALSE	FALSE	TRUE	FALSE
YAL019W	-0.275634	0.847997	-0.115477	-1.16993	-0.0780025	0	FALSE	FALSE	FALSE	FALSE	FALSE	FALSE
YAL018C	NA	NA	NA	0	NA	NA	FALSE	FALSE	FALSE	FALSE	FALSE	FALSE
YAL017W	-0.222392	-0.934905	0.222392	-1	-0.192645	-0.321928	TRUE	TRUE	TRUE	FALSE	TRUE	TRUE
YAL016W	0.752072	0.321928	1.4021	0.152003	1.4245	0.979241	FALSE	TRUE	FALSE	FALSE	FALSE	TRUE
YAL015C	NA	NA	NA	-2	NA	-2.58496	FALSE	FALSE	FALSE	FALSE	FALSE	FALSE
YAL014C	0.0418202	0.321928	0.949374	1.5025	1.73118	2.63743	TRUE	TRUE	TRUE	FALSE	TRUE	FALSE
YAL013W	0.922832	-0.343954	1.62244	0.678072	1.3265	1.09954	TRUE	TRUE	TRUE	TRUE	TRUE	TRUE
YAL012W	1.51706	2.01436	1.81124	1.60666	1.70922	1.29068	TRUE	TRUE	TRUE	TRUE	TRUE	TRUE
YAL011W	-1.1375	NA	0.530515	-0.263034	0.222392	0	FALSE	FALSE	FALSE	FALSE	FALSE	FALSE
YAL010C	3.58496	3.03562	3.2854	3.39232	2.42321	2.65208	FALSE	FALSE	FALSE	FALSE	FALSE	FALSE
YAL009W	2.1375	1	2.27684	-0.280108	1.22882	-0.251539	FALSE	FALSE	FALSE	FALSE	TRUE	TRUE
YAL008W	1.73697	0.807355	2.8365	1.94753	3.09954	1.75002	FALSE	FALSE	FALSE	FALSE	FALSE	FALSE
YAL007C	0.70044	0	0.807355	1.80735	0.652077	0.736966	FALSE	FALSE	FALSE	FALSE	FALSE	FALSE
YAL005C	0.489038	1.59585	0.602665	1.43982	0.794139	1.37798	TRUE	TRUE	TRUE	TRUE	TRUE	TRUE
YAL003W	2.6148	2.03263	2.52108	2.28701	3.02672	1.82958	TRUE	TRUE	TRUE	TRUE	TRUE	TRUE
YAL003W	NA	NA	NA	NA	NA	NA	FALSE	FALSE	FALSE	FALSE	FALSE	FALSE
YAL002W	1.9386	1.24793	3	0.652077	2.85798	1.80735	FALSE	FALSE	FALSE	FALSE	FALSE	FALSE
YAL001C	-0.152003	-0.125531	0.906891	-0.459432	-0.0995357	0.36257	FALSE	FALSE	FALSE	FALSE	FALSE	FALSE
YAL001C	NA	NA	NA	NA	NA	NA	FALSE	FALSE	FALSE	FALSE	FALSE	FALSE
YAR002W	2.18763	1.71621	2.58496	1.70044	2.34577	2.09954	FALSE	FALSE	FALSE	FALSE	FALSE	FALSE
YAR002C-A	0	0	0.874469	0	0.514573	2.32193	FALSE	FALSE	FALSE	FALSE	FALSE	FALSE
YAR003W	3.32193	2.16993	NA	4.16993	NA	3.64386	FALSE	FALSE	FALSE	FALSE	FALSE	FALSE
YAR007C	-0.263034	1.58496	1.16993	1.58496	0.169925	-1	FALSE	FALSE	FALSE	FALSE	FALSE	FALSE
YAR008W	-1	-0.584963	-0.36257	1	0.263034	-2.16993	FALSE	FALSE	FALSE	FALSE	FALSE	FALSE
YAR014C	2.18057	5.35755	2.44746	3.11548	3.24793	2.78136	FALSE	FALSE	FALSE	FALSE	FALSE	FALSE
YAR015W	-0.0780025	0.29956	-0.0703893	-0.874469	0.040642	-0.447459	TRUE	FALSE	TRUE	FALSE	TRUE	FALSE
YAR018C	-2.45943	0	1.32193	1	1.41504	-0.321928	FALSE	FALSE	FALSE	FALSE	FALSE	FALSE
YAR019C	1.41504	3.45943	2.11548	2.58496	2.32193	4.16993	FALSE	FALSE	FALSE	FALSE	FALSE	FALSE
YAR020C	NA	1.58496	-1	2.32193	0	0	FALSE	FALSE	FALSE	FALSE	FALSE	FALSE
YAR023C	NA	0.736966	NA	2	1	1	FALSE	FALSE	FALSE	FALSE	FALSE	FALSE
YAR027W	1.73697	0.247928	2.64386	3.32193	1.5025	1.37851	FALSE	FALSE	FALSE	FALSE	FALSE	FALSE
YAR028W	1	NA	0.415037	0.263034	2	0.584963	FALSE	FALSE	FALSE	FALSE	FALSE	FALSE
YAR029W	0	0.807355	1	NA	2.32193	2.32193	FALSE	FALSE	FALSE	FALSE	FALSE	FALSE
YAR031W	NA	NA	NA	NA	NA	NA	FALSE	FALSE	FALSE	FALSE	FALSE	FALSE
YAR033W	1.58496	NA	NA	1.58496	2	1.58496	FALSE	FALSE	FALSE	FALSE	FALSE	FALSE
YAR035W	NA	NA	NA	NA	1	NA	FALSE	FALSE	FALSE	FALSE	FALSE	FALSE
YAR035C-A	NA	NA	NA	NA	NA	NA	FALSE	FALSE	FALSE	FALSE	FALSE	FALSE
YAR042W	0.459432	2	1.91427	1.54432	1.80735	1.30485	FALSE	FALSE	FALSE	FALSE	FALSE	FALSE
YAR050W	NA	NA	NA	NA	NA	NA	FALSE	FALSE	FALSE	FALSE	FALSE	FALSE
YAR064W	NA	NA	NA	NA	NA	NA	FALSE	FALSE	FALSE	FALSE	FALSE	FALSE
YAR066W	NA	NA	NA	NA	NA	NA	FALSE	FALSE	FALSE	FALSE	FALSE	FALSE
YAR068W	0	NA	-1	1	NA	1	FALSE	FALSE	FALSE	FALSE	FALSE	FALSE
YAR071W	-2.32193	NA	NA	-2.58496	NA	NA	FALSE	FALSE	FALSE	FALSE	FALSE	FALSE
YBL113C	1.03562	1.18442	1.88753	0.722466	0.917538	-0.214125	TRUE	TRUE	TRUE	TRUE	TRUE	TRUE
YBL112C	-4.9542	NA	NA	NA	-3.5025	-4.64386	FALSE	FALSE	FALSE	FALSE	FALSE	FALSE
YBL111C	-5.61471	NA	-4.61471	-4.39232	-4.2854	NA	FALSE	FALSE	FALSE	FALSE	FALSE	FALSE
YBL111C	NA	NA	NA	NA	NA	NA	FALSE	FALSE	FALSE	FALSE	FALSE	FALSE
YBL108C-A	NA	NA	NA	NA	NA	NA	FALSE	FALSE	FALSE	FALSE	FALSE	FALSE
YBL107C	-3.45943	-2	-1.73697	NA	-2.32193	-2.32193	FALSE	FALSE	FALSE	FALSE	FALSE	FALSE
YBL106C	NA	1	0	NA	0	NA	FALSE	FALSE	FALSE	FALSE	FALSE	FALSE
YBL105C	0.280108	1.22239	0	1.32193	0	1.078	FALSE	FALSE	FALSE	FALSE	FALSE	FALSE
YBL104C	0.584963	-0.584963	2.32193	NA	0.736966	0	FALSE	FALSE	FALSE	FALSE	FALSE	FALSE
YBL103C	0.736966	1.06413	0.321928	2.45943	1.17688	1.92057	TRUE	FALSE	TRUE	FALSE	TRUE	FALSE
YBL102W	0.152003	0.447459	-0.415037	1	0.169925	0.169925	FALSE	FALSE	FALSE	FALSE	FALSE	FALSE
YBL101C	1.58496	0.137504	1.50901	0.14439	1.41504	1.20163	FALSE	TRUE	FALSE	FALSE	FALSE	TRUE
YBL100W-C	NA	NA	NA	0	NA	NA	FALSE	FALSE	FALSE	FALSE	FALSE	FALSE
YBL099W	2.47805	1.42626	2.63227	2.8413	2.71049	1.32193	FALSE	FALSE	FALSE	FALSE	FALSE	FALSE
YBL098W	NA	NA	NA	2	NA	NA	FALSE	FALSE	FALSE	FALSE	FALSE	FALSE
YBL097W	-0.584963	NA	1.80735	1	NA	2.32193	FALSE	FALSE	FALSE	FALSE	FALSE	FALSE
YBL095W	-1.152	-0.192645	1.28951	1.58496	0.241008	2.80735	FALSE	FALSE	FALSE	FALSE	FALSE	FALSE
YBL093C	1	0.115477	1.50479	1.42884	1.76783	-0.0931094	TRUE	TRUE	TRUE	FALSE	TRUE	TRUE
YBL092W	-9.24079	NA	-9.9571	NA	NA	NA	FALSE	FALSE	FALSE	FALSE	FALSE	FALSE
YBL091C-A	-1.51457	-2.73697	-0.70044	-2.11548	-1.19265	-2.07039	FALSE	FALSE	FALSE	FALSE	FALSE	FALSE
YBL091C-A	NA	NA	NA	NA	NA	NA	FALSE	FALSE	FALSE	FALSE	FALSE	FALSE
YBL091C	-0.86507	-1	-0.584963	-1.074	-0.628031	-0.827163	TRUE	TRUE	TRUE	FALSE	TRUE	TRUE
YBL090W	1.09954	2.11548	3	1.73697	2.97728	2.73697	FALSE	FALSE	FALSE	FALSE	FALSE	FALSE
YBL089W	NA	4.24793	NA	3	NA	3.16993	FALSE	FALSE	FALSE	FALSE	FALSE	FALSE
YBL088C	-1.48543	1	0.807355	0.736966	-0.736966	0.36257	FALSE	FALSE	FALSE	FALSE	FALSE	FALSE
YBL087C	-2.94877	-2.40939	-2.68625	-1.6746	-2.81816	-2.52356	TRUE	FALSE	TRUE	TRUE	TRUE	TRUE
YBL087C	NA	NA	NA	NA	NA	NA	FALSE	FALSE	FALSE	FALSE	FALSE	FALSE
YBL086C	-0.584963	-0.415037	-1.32193	0.321928	-2.58496	0.392317	FALSE	FALSE	FALSE	FALSE	FALSE	FALSE
YBL085W	1.32193	2.41504	1.05445	1.32193	0.736966	1.36257	FALSE	FALSE	FALSE	FALSE	FALSE	FALSE
YBL084C	NA	NA	NA	NA	1.58496	NA	FALSE	FALSE	FALSE	FALSE	FALSE	FALSE
YBL082C	3.93074	5.12928	4.92283	3.62449	3.98706	6.20945	FALSE	FALSE	FALSE	FALSE	FALSE	FALSE
YBL081W	0.563901	-1.1375	0.395929	-0.584963	0.0588937	1.16993	TRUE	FALSE	FALSE	FALSE	TRUE	FALSE
YBL080C	3.16993	2.32193	2.32193	3	2.45943	2.11548	FALSE	FALSE	FALSE	FALSE	FALSE	FALSE
YBL079W	-0.197939	-0.0489096	0.0395284	-1	-0.180572	-1.152	TRUE	TRUE	TRUE	FALSE	TRUE	FALSE
YBL078C	0.0430687	-0.0874628	0.219313	0.457851	0.59172	-0.156303	TRUE	TRUE	TRUE	TRUE	TRUE	TRUE
YBL076C	0.267933	0.667425	0.904843	0.169925	0.966833	0.49304	TRUE	FALSE	TRUE	TRUE	TRUE	TRUE
YBL075C	0.652077	0	1.37851	2.58496	-0.847997	-0.152003	FALSE	FALSE	FALSE	FALSE	FALSE	FALSE
YBL074C	1	0	0.263034	NA	2.58496	2.32193	FALSE	FALSE	FALSE	FALSE	FALSE	FALSE
YBL072C	-6.9002	-7.39803	-7.26823	-7.19229	-7.77957	-7.04075	FALSE	FALSE	FALSE	FALSE	FALSE	FALSE
YBL071C-B	-3.16993	-1.58496	-4.32193	NA	-4.70044	-3.32193	FALSE	FALSE	FALSE	FALSE	FALSE	FALSE
YBL071W-A	1.80314	1.58496	2.35279	1.47805	2.45025	1.48543	TRUE	FALSE	TRUE	FALSE	TRUE	FALSE
YBL069W	1	1.32193	0.321928	2.32193	3.16993	2	FALSE	FALSE	FALSE	FALSE	FALSE	FALSE
YBL068W	1.58496	-0.584963	1.39232	-1	2	-0.847997	FALSE	FALSE	FALSE	FALSE	FALSE	FALSE
YBL067C	0.716207	1.76553	0.63743	1.16993	0.125531	0.485427	FALSE	FALSE	FALSE	FALSE	FALSE	FALSE
YBL066C	0	-0.678072	0.321928	-1	1.73697	1.11548	FALSE	FALSE	FALSE	FALSE	FALSE	FALSE
YBL064C	0.485427	0.106915	3.32193	0	2	0.884523	FALSE	FALSE	FALSE	FALSE	FALSE	FALSE
YBL063W	2.16993	2	3.90689	1.58496	1.28951	0.192645	FALSE	FALSE	FALSE	FALSE	FALSE	FALSE
YBL061C	-0.89812	-0.378512	-0.0962153	-1.37851	-0.180572	-1.66297	TRUE	FALSE	TRUE	FALSE	TRUE	FALSE
YBL060W	1.5025	1.76553	4.16993	2.45943	2.80735	1.70044	FALSE	FALSE	FALSE	FALSE	FALSE	FALSE
YBL059C-A	2.16993	2.32193	2.08746	2.58496	2.18442	2.85798	FALSE	FALSE	FALSE	FALSE	FALSE	FALSE
YBL059C-A	NA	NA	NA	NA	NA	NA	FALSE	FALSE	FALSE	FALSE	FALSE	FALSE
YBL059W	-2	-1	NA	NA	NA	NA	FALSE	FALSE	FALSE	FALSE	FALSE	FALSE
YBL059W	NA	NA	NA	NA	NA	NA	FALSE	FALSE	FALSE	FALSE	FALSE	FALSE
YBL058W	-0.137504	-0.750022	0.534336	-0.289507	0.400538	0.0687128	TRUE	TRUE	TRUE	FALSE	TRUE	TRUE
YBL057C	-0.584963	-0.70044	1.28011	1.67807	2.45943	1.28951	FALSE	FALSE	FALSE	FALSE	FALSE	FALSE
YBL056W	1.53051	0.616671	1.29546	2.11548	2.28011	1.11548	FALSE	FALSE	FALSE	FALSE	FALSE	FALSE
YBL055C	-0.736966	-2	0.222392	0	0	-0.807355	FALSE	FALSE	FALSE	FALSE	FALSE	FALSE
YBL054W	1.20163	NA	1.58496	0	1.45943	1.58496	FALSE	FALSE	FALSE	FALSE	FALSE	FALSE
YBL052C	-1.18442	0	-1.67807	-1.80735	-0.347923	-0.485427	FALSE	FALSE	FALSE	FALSE	FALSE	FALSE
YBL051C	-0.619728	-0.841302	-0.402759	-1.27302	-0.514573	-1.28951	TRUE	TRUE	TRUE	TRUE	TRUE	TRUE
YBL050W	-0.70044	-0.192645	-0.777608	-0.906891	-0.793549	-0.621488	FALSE	FALSE	FALSE	FALSE	FALSE	FALSE
YBL050W	NA	NA	NA	NA	NA	NA	FALSE	FALSE	FALSE	FALSE	FALSE	FALSE
YBL049W	NA	3.32193	3	NA	NA	NA	FALSE	FALSE	FALSE	FALSE	FALSE	FALSE
YBL047C	-1.54432	-1.65711	-1.88753	-1.26303	-1.2854	-0.375509	FALSE	FALSE	FALSE	FALSE	FALSE	TRUE
YBL046W	-1.58496	-0.736966	0.847997	-1.32193	-0.736966	-1.32193	FALSE	FALSE	FALSE	FALSE	FALSE	FALSE
YBL045C	2.28951	2.03684	2.96578	1.75002	2.56071	1.8529	FALSE	TRUE	FALSE	TRUE	TRUE	TRUE
YBL044W	NA	NA	NA	NA	NA	NA	FALSE	FALSE	FALSE	FALSE	FALSE	FALSE
YBL043W	NA	NA	-1.58496	0	NA	-1	FALSE	FALSE	FALSE	FALSE	FALSE	FALSE
YBL042C	0.807355	4.08746	0.610053	-0.263034	1.10692	0	FALSE	FALSE	FALSE	FALSE	FALSE	FALSE
YBL041W	1.50696	1.15754	1.95109	1.64386	2.38333	1.93681	TRUE	TRUE	TRUE	TRUE	TRUE	TRUE
YBL040C	1.43296	2.08746	1.55943	2.41504	2.34239	1.96683	FALSE	FALSE	FALSE	FALSE	FALSE	FALSE
YBL040C	NA	NA	NA	NA	NA	NA	FALSE	FALSE	FALSE	FALSE	FALSE	FALSE
YBL039W-B	-1	-1.58496	-2	-1.58496	-1.22239	-1.80735	FALSE	FALSE	FALSE	FALSE	FALSE	FALSE
YBL039C	3.49643	NA	2.90689	2.90689	3.97728	2.66297	FALSE	FALSE	FALSE	FALSE	FALSE	FALSE
YBL038W	3.24793	3.16993	2.03562	3.16993	4.55459	2.72247	FALSE	FALSE	FALSE	FALSE	FALSE	FALSE
YBL037W	1.58496	-0.678072	1.73697	-0.415037	0.652077	0	FALSE	FALSE	FALSE	FALSE	FALSE	FALSE
YBL036C	-2.09516	-1.9386	-0.61891	-0.584963	-0.140863	-1.37851	FALSE	FALSE	TRUE	FALSE	TRUE	FALSE
YBL035C	2	NA	-0.415037	0	1	0	FALSE	FALSE	FALSE	FALSE	FALSE	FALSE
YBL034C	-0.263034	-1	-2.80735	0.584963	-0.736966	1.58496	FALSE	FALSE	FALSE	FALSE	FALSE	FALSE
YBL033C	-1.20645	-0.247928	-0.106915	0.943416	0.356144	0.0995357	FALSE	FALSE	TRUE	FALSE	TRUE	FALSE
YBL032W	2.27009	2	2.16993	2.65535	2.40881	1.30256	FALSE	FALSE	TRUE	FALSE	TRUE	TRUE
YBL031W	-1.07039	-0.70044	1.45943	-1.32193	-0.115477	0.169925	FALSE	FALSE	FALSE	FALSE	FALSE	FALSE
YBL030C	1.85148	1.98489	2.06088	3.03953	1.88349	2.49881	TRUE	TRUE	TRUE	FALSE	TRUE	TRUE
YBL029C-A	1.4021	1.974	3.11548	3.91886	3.64386	2.58496	FALSE	TRUE	FALSE	FALSE	FALSE	TRUE
YBL029W	1	NA	NA	NA	NA	NA	FALSE	FALSE	FALSE	FALSE	FALSE	FALSE
YBL028C	0.426265	-1	1.11247	-0.304855	0.387023	0	TRUE	FALSE	TRUE	FALSE	TRUE	TRUE
YBL027W	0.501398	0.153351	1.28135	1.14244	0.938249	1.0765	TRUE	TRUE	TRUE	TRUE	TRUE	TRUE
YBL027W	NA	NA	NA	NA	NA	NA	FALSE	FALSE	FALSE	FALSE	FALSE	FALSE
YBL026W	-0.688056	0.415037	0.678072	0.777608	0.465664	0.222392	FALSE	FALSE	FALSE	FALSE	TRUE	FALSE
YBL026W	NA	NA	NA	NA	NA	NA	FALSE	FALSE	FALSE	FALSE	FALSE	FALSE
YBL025W	0.36257	0.321928	1.09954	2.80735	0.830075	-0.192645	FALSE	FALSE	FALSE	FALSE	FALSE	FALSE
YBL024W	0.956279	0.874469	1.08989	-0.839535	1.13386	-0.289507	TRUE	FALSE	TRUE	FALSE	TRUE	TRUE
YBL023C	1.58496	1.32193	1.41504	1	1.44057	3.08746	FALSE	FALSE	FALSE	FALSE	FALSE	FALSE
YBL022C	0.152003	0	0.612977	-0.415037	0.222392	0.4975	FALSE	FALSE	FALSE	FALSE	FALSE	FALSE
YBL021C	1.84327	2.05063	1.31366	1.95936	1.52154	1.03747	FALSE	FALSE	TRUE	FALSE	TRUE	FALSE
YBL020W	1.80735	3.32193	2.26303	1.70044	3.39232	3.80735	FALSE	FALSE	FALSE	FALSE	FALSE	FALSE
YBL019W	0	1.58496	NA	0	1.58496	NA	FALSE	FALSE	FALSE	FALSE	FALSE	FALSE
YBL018C	1.36923	2.80735	3.2854	1.16993	3.02975	1.22239	FALSE	FALSE	FALSE	FALSE	FALSE	FALSE
YBL018C	NA	NA	NA	NA	NA	NA	FALSE	FALSE	FALSE	FALSE	FALSE	FALSE
YBL017C	0.115477	-1.09311	0.400538	0.206451	0.657112	0.222392	TRUE	FALSE	TRUE	FALSE	TRUE	FALSE
YBL016W	2.45317	0.321928	2.44057	2.03242	2.79256	0.936806	TRUE	TRUE	TRUE	FALSE	TRUE	TRUE
YBL015W	-1.54432	-1	-1.18442	-2.22239	-1.58496	-1.91754	FALSE	FALSE	FALSE	FALSE	FALSE	FALSE
YBL014C	1.2854	1.53051	3	1.58496	2.87447	1.67807	FALSE	FALSE	FALSE	FALSE	FALSE	FALSE
YBL013W	1.32193	4	2.32193	NA	NA	2.08746	FALSE	FALSE	FALSE	FALSE	FALSE	FALSE
YBL011W	0.0703893	0.819428	0.211504	0.628031	0.706269	0.106915	TRUE	FALSE	FALSE	FALSE	FALSE	TRUE
YBL010C	1.36257	2.80735	2.60881	1.73697	4.58496	1.078	FALSE	FALSE	FALSE	FALSE	FALSE	FALSE
YBL009W	0.736966	1.58496	3.52356	NA	2.11548	2.32193	FALSE	FALSE	FALSE	FALSE	FALSE	FALSE
YBL008W-A	NA	NA	NA	NA	NA	NA	FALSE	FALSE	FALSE	FALSE	FALSE	FALSE
YBL008W	0.847997	NA	-1	0	0	0.415037	FALSE	FALSE	FALSE	FALSE	FALSE	FALSE
YBL007C	2.65344	2.67557	3.57635	2.4361	3.48206	2.74416	TRUE	FALSE	FALSE	FALSE	TRUE	TRUE
YBL006C	2.27612	2.6845	3.24576	2.93546	2.98633	2.93664	TRUE	TRUE	TRUE	TRUE	TRUE	TRUE
YBL005W	-1.58496	-0.736966	0.415037	0	-0.847997	-0.584963	FALSE	FALSE	FALSE	FALSE	FALSE	FALSE
YBL004W	-0.906891	0	-0.192645	-3.32193	-1.22239	-1.67807	FALSE	FALSE	FALSE	FALSE	FALSE	FALSE
YBL003C	1.18601	1.17206	1.44626	1.38606	1.5521	0.282035	TRUE	TRUE	TRUE	TRUE	TRUE	TRUE
YBL002W	-0.106371	-0.78099	0.329965	-0.657894	-0.0940945	-0.800391	TRUE	TRUE	TRUE	TRUE	TRUE	TRUE
YBL001C	1.38702	0.612977	2.89308	0.796467	1.558	0	FALSE	FALSE	FALSE	FALSE	FALSE	TRUE
YBR001C	1.85798	1.32193	1.88753	1.02647	1.50901	1.04307	FALSE	TRUE	FALSE	TRUE	FALSE	TRUE
YBR002C	2.05889	3.5025	3.44626	2.9542	3.25376	3.07039	FALSE	FALSE	FALSE	FALSE	FALSE	FALSE
YBR003W	-0.459432	0.115477	0	0.321928	1.65208	0.211504	FALSE	FALSE	FALSE	FALSE	FALSE	FALSE
YBR004C	0.584963	NA	-1	NA	-1	NA	FALSE	FALSE	FALSE	FALSE	FALSE	FALSE
YBR005W	-0.932886	-0.222392	0.415037	0.169925	0.137504	-0.152003	TRUE	FALSE	TRUE	FALSE	TRUE	FALSE
YBR006W	0	-0.125531	1.19265	0.415037	1.22239	-0.893085	FALSE	FALSE	FALSE	FALSE	FALSE	FALSE
YBR007C	-1.67807	-2.58496	-1.87447	-2.32193	-2.27302	-3.80735	FALSE	FALSE	FALSE	FALSE	FALSE	FALSE
YBR008C	-0.628031	1	0.765535	-0.847997	-0.678072	-0.321928	FALSE	FALSE	FALSE	FALSE	FALSE	FALSE
YBR009C	0.810588	0.48134	0.891676	0.658566	0.905272	0.416669	TRUE	TRUE	TRUE	TRUE	TRUE	TRUE
YBR010W	2.43155	2.21842	1.79141	3.02495	2.04904	2.31933	TRUE	TRUE	TRUE	TRUE	TRUE	TRUE
YBR011C	-0.577185	-1.05247	-0.372912	-1.11346	-0.0390998	-0.763766	TRUE	TRUE	TRUE	TRUE	TRUE	TRUE
YBR013C	NA	NA	NA	2	NA	2.58496	FALSE	FALSE	FALSE	FALSE	FALSE	FALSE
YBR014C	1.44057	-0.415037	0.765535	0.514573	0.906891	0.211504	FALSE	FALSE	TRUE	FALSE	FALSE	FALSE
YBR015C	-0.584963	-1.45943	-0.830075	-0.736966	-0.736966	-0.378512	FALSE	FALSE	FALSE	FALSE	FALSE	FALSE
YBR016W	2.09095	1.81052	2.96441	2.1375	3.02998	2.05528	TRUE	TRUE	TRUE	TRUE	TRUE	TRUE
YBR017C	3.09954	2.44478	2.32193	2.16993	3.67807	1.6845	FALSE	FALSE	FALSE	FALSE	FALSE	FALSE
YBR018C	0	-1	NA	-1	0	-1	FALSE	FALSE	FALSE	FALSE	FALSE	FALSE
YBR019C	NA	NA	NA	NA	NA	NA	FALSE	FALSE	FALSE	FALSE	FALSE	FALSE
YBR020W	-1	1.58496	NA	NA	1	NA	FALSE	FALSE	FALSE	FALSE	FALSE	FALSE
YBR021W	1.58496	2.80735	1	2	NA	2.58496	FALSE	FALSE	FALSE	FALSE	FALSE	FALSE
YBR022W	-0.584963	-2	1	0.263034	-0.137504	0	FALSE	FALSE	FALSE	FALSE	FALSE	FALSE
YBR023C	-1.078	-0.415037	-1.04731	-0.893085	-0.678072	-2.9386	FALSE	FALSE	FALSE	FALSE	FALSE	FALSE
YBR024W	0.459432	-0.447459	-0.347923	-0.222392	-0.180572	1.10692	FALSE	FALSE	FALSE	FALSE	FALSE	FALSE
YBR025C	0.932886	0.584963	0.814444	0.652077	1.21412	-0.251539	TRUE	FALSE	TRUE	FALSE	TRUE	TRUE
YBR026C	1.45943	-0.415037	1	0	3.58496	2.58496	FALSE	FALSE	FALSE	FALSE	FALSE	FALSE
YBR028C	1.66297	0	0.0931094	0.736966	0.678072	0.63743	FALSE	FALSE	FALSE	FALSE	FALSE	FALSE
YBR029C	1.58496	2	0.378512	0.321928	0.552541	0	FALSE	FALSE	FALSE	FALSE	FALSE	FALSE
YBR030W	0	0.584963	-1.16993	-1.58496	-2.16993	-1.80735	FALSE	FALSE	FALSE	FALSE	FALSE	FALSE
YBR031W	3.48894	2.94753	3.80735	4.79442	3.79701	2.97982	TRUE	FALSE	TRUE	FALSE	TRUE	TRUE
YBR033W	NA	NA	0	NA	NA	0	FALSE	FALSE	FALSE	FALSE	FALSE	FALSE
YBR034C	0.770518	2	0.36257	NA	1.926	0	FALSE	FALSE	FALSE	FALSE	FALSE	FALSE
YBR035C	1.03953	-0.275634	2.35755	1.24793	1.91073	0.0801703	FALSE	FALSE	FALSE	FALSE	TRUE	TRUE
YBR036C	3.53605	3.51457	3.86129	3.85086	3.94837	3.59991	FALSE	FALSE	FALSE	FALSE	FALSE	FALSE
YBR037C	0.917538	2.20163	3.39232	2.24793	1.95936	2.08746	FALSE	FALSE	FALSE	FALSE	FALSE	FALSE
YBR038W	2.32193	1.20163	1.63227	1.32193	1.09954	1.67807	FALSE	FALSE	FALSE	FALSE	FALSE	FALSE
YBR039W	2.11548	-0.106915	0.584963	2.64386	1.82597	2	FALSE	FALSE	TRUE	FALSE	FALSE	FALSE
YBR040W	NA	NA	NA	NA	NA	NA	FALSE	FALSE	FALSE	FALSE	FALSE	FALSE
YBR041W	-0.584963	1	1.41504	2.16993	1.58496	0.678072	FALSE	FALSE	FALSE	FALSE	FALSE	FALSE
YBR042C	NA	3.70044	3.32193	NA	3	NA	FALSE	FALSE	FALSE	FALSE	FALSE	FALSE
YBR043C	1.78427	1.58496	2.32193	3.58496	0.395929	0.192645	FALSE	FALSE	FALSE	FALSE	FALSE	FALSE
YBR044C	0.807355	NA	1	2.32193	0.862496	1.26303	FALSE	FALSE	FALSE	FALSE	FALSE	FALSE
YBR045C	-1.58496	0.70044	-1	1.58496	1	-2.45943	FALSE	FALSE	FALSE	FALSE	FALSE	FALSE
YBR046C	0.678072	0.459432	0.932886	0.932886	0.836501	-0.0703893	FALSE	FALSE	FALSE	FALSE	FALSE	TRUE
YBR047W	NA	-2.08746	0	0	1.58496	0.415037	FALSE	FALSE	FALSE	FALSE	FALSE	FALSE
YBR048W	1.04566	1.56478	1.98449	2.04342	1.88753	2.03709	TRUE	TRUE	TRUE	TRUE	TRUE	TRUE
YBR048W	NA	NA	NA	NA	NA	NA	FALSE	FALSE	FALSE	FALSE	FALSE	FALSE
YBR049C	-1.32193	-0.736966	0.131245	0.289507	0	-1	FALSE	FALSE	TRUE	FALSE	TRUE	FALSE
YBR050C	0	0	NA	NA	NA	0	FALSE	FALSE	FALSE	FALSE	FALSE	FALSE
YBR052C	0.584963	0.313158	1.20945	0.226276	0.635236	0.611435	TRUE	TRUE	TRUE	TRUE	TRUE	TRUE
YBR053C	-0.169925	-2.67807	-1.58496	-0.70044	-1.16993	-2.80735	FALSE	FALSE	FALSE	FALSE	FALSE	FALSE
YBR054W	1.91754	0.716207	0.263034	0.943416	0.893085	1.11548	FALSE	TRUE	FALSE	FALSE	FALSE	FALSE
YBR055C	-0.289507	-1.45943	0.874469	0.415037	1.08746	0.321928	FALSE	FALSE	FALSE	FALSE	FALSE	FALSE
YBR056W	0.710493	0.163499	2.20163	2.39232	1.926	0.612977	FALSE	TRUE	FALSE	FALSE	FALSE	TRUE
YBR057C	-0.31034	-0.415037	-0.0524674	-1.45943	0.0565835	-0.29956	TRUE	FALSE	TRUE	FALSE	TRUE	TRUE
YBR058C	3.08746	0.584963	2.58496	0.321928	1.5025	1	FALSE	FALSE	FALSE	FALSE	FALSE	FALSE
YBR058C-A	0.163499	0.253757	0.423211	0.199309	0.945552	0.336049	TRUE	TRUE	TRUE	TRUE	TRUE	TRUE
YBR059C	0.621488	-0.932886	-0.222392	-0.736966	-0.152003	0.906891	FALSE	FALSE	TRUE	FALSE	FALSE	FALSE
YBR060C	-1.58496	-1.5025	-1.20163	0	-1.10692	-0.29956	FALSE	FALSE	FALSE	FALSE	FALSE	FALSE
YBR061C	1.34792	1	1.12928	1.32193	1.03747	1.32193	FALSE	FALSE	FALSE	FALSE	FALSE	FALSE
YBR062C	-1.32193	-2.58496	-3.80735	-0.263034	-2	-2.80735	FALSE	FALSE	FALSE	FALSE	FALSE	FALSE
YBR062C	NA	NA	NA	NA	NA	NA	FALSE	FALSE	FALSE	FALSE	FALSE	FALSE
YBR063C	-0.169925	-1.32193	-0.321928	1.22239	-0.415037	-0.263034	FALSE	FALSE	FALSE	FALSE	FALSE	FALSE
YBR065C	2.07039	0.415037	1.58496	1	1.58496	0.736966	FALSE	FALSE	FALSE	FALSE	FALSE	FALSE
YBR066C	1.80735	0.736966	1.84327	2.45943	2.58496	2.04731	FALSE	FALSE	FALSE	FALSE	FALSE	FALSE
YBR067C	-0.83399	-0.160465	0.691878	0.584963	0.736966	0.275634	TRUE	FALSE	TRUE	FALSE	TRUE	FALSE
YBR068C	1.08746	0.584963	1.29373	1.38904	1.26679	1.93289	FALSE	TRUE	TRUE	TRUE	TRUE	TRUE
YBR069C	0	0.621488	0.0458037	-0.584963	0.306661	0	TRUE	FALSE	TRUE	FALSE	TRUE	TRUE
YBR070C	3	NA	2.58496	3.32193	3.63227	1.73697	FALSE	FALSE	FALSE	FALSE	FALSE	FALSE
YBR071W	-0.569366	0.415037	0.454566	0.192645	-0.36257	-0.736966	TRUE	FALSE	TRUE	FALSE	TRUE	FALSE
YBR072W	0.786596	0.306103	0.750386	0.321928	0.73016	0.214594	TRUE	TRUE	TRUE	TRUE	TRUE	TRUE
YBR072C-A	NA	NA	NA	NA	NA	NA	FALSE	FALSE	FALSE	FALSE	FALSE	FALSE
YBR073W	NA	-3.80735	-2.9386	-4.70044	-4.23266	-3.36923	FALSE	FALSE	FALSE	FALSE	FALSE	FALSE
YBR074W	-1.32193	-1.80735	-2.16993	NA	-1.58496	NA	FALSE	FALSE	FALSE	FALSE	FALSE	FALSE
YBR076W	NA	NA	NA	NA	NA	NA	FALSE	FALSE	FALSE	FALSE	FALSE	FALSE
YBR077C	0	1	0.584963	2	2	0.807355	FALSE	FALSE	FALSE	FALSE	FALSE	FALSE
YBR078W	-0.213779	0.192645	0.311944	-0.459432	0.224966	-0.181838	TRUE	TRUE	TRUE	TRUE	TRUE	TRUE
YBR078W	NA	NA	NA	NA	NA	NA	FALSE	FALSE	FALSE	FALSE	FALSE	FALSE
YBR079C	2	3.45943	1.9386	3.70044	2.09311	1.12553	FALSE	FALSE	FALSE	FALSE	FALSE	FALSE
YBR080C	1.67807	2.03953	1.51937	0.63743	2.1592	1.05445	FALSE	FALSE	FALSE	FALSE	FALSE	FALSE
YBR081C	-1.78427	-2.66297	-2.36257	-1.87447	-1.78427	-1.32193	FALSE	FALSE	FALSE	FALSE	FALSE	FALSE
YBR082C	0.706009	0.261328	0.775847	0.751612	0.613914	0.705475	TRUE	TRUE	TRUE	TRUE	TRUE	TRUE
YBR082C	NA	NA	NA	NA	NA	NA	FALSE	FALSE	FALSE	FALSE	FALSE	FALSE
YBR083W	2	1	1.05445	1	0.540568	0.906891	FALSE	FALSE	FALSE	FALSE	FALSE	FALSE
YBR084W	0.95109	2	1.22239	1	0.932886	1.58496	FALSE	FALSE	FALSE	FALSE	FALSE	FALSE
YBR084C-A	1.2414	1.51602	2.02661	0.956931	2.07351	1.20309	TRUE	TRUE	TRUE	TRUE	TRUE	TRUE
YBR084C-A	NA	NA	NA	NA	NA	NA	FALSE	FALSE	FALSE	FALSE	FALSE	FALSE
YBR085W	0.584963	NA	0.584963	NA	NA	NA	FALSE	FALSE	FALSE	FALSE	FALSE	FALSE
YBR085C-A	-0.927488	-1.08366	0.254814	-0.881356	0.288125	-0.815575	TRUE	TRUE	TRUE	TRUE	TRUE	TRUE
YBR086C	0.280108	-0.710493	-0.667425	-0.180572	0	-1.04731	FALSE	TRUE	FALSE	FALSE	FALSE	FALSE
YBR087W	NA	NA	NA	-1.32193	-1.58496	-2.32193	FALSE	FALSE	FALSE	FALSE	FALSE	FALSE
YBR088C	3.58496	2.24793	3.14136	2.63227	4.5025	2.48938	FALSE	FALSE	FALSE	FALSE	FALSE	FALSE
YBR089C-A	-0.530515	-0.192645	-1.16993	0.584963	-0.280108	0.280108	FALSE	FALSE	FALSE	FALSE	FALSE	FALSE
YBR090C	-4.32193	NA	-4.24793	NA	-3.32193	NA	FALSE	FALSE	FALSE	FALSE	FALSE	FALSE
YBR090C	NA	NA	NA	NA	NA	NA	FALSE	FALSE	FALSE	FALSE	FALSE	FALSE
YBR091C	2.60666	2.67807	2.89482	4.42626	3.64909	2.77259	FALSE	FALSE	FALSE	FALSE	FALSE	FALSE
YBR092C	1.47805	0.847997	1.32193	0.415037	2.36923	0.777608	FALSE	FALSE	TRUE	FALSE	FALSE	FALSE
YBR093C	NA	NA	NA	NA	NA	NA	FALSE	FALSE	FALSE	FALSE	FALSE	FALSE
YBR094W	1	1	NA	NA	1	NA	FALSE	FALSE	FALSE	FALSE	FALSE	FALSE
YBR095C	1.1375	0.169925	2.90689	3.32193	1.848	0.280108	FALSE	FALSE	FALSE	FALSE	FALSE	FALSE
YBR096W	-2	-1	-1.58496	NA	-1	NA	FALSE	FALSE	FALSE	FALSE	FALSE	FALSE
YBR097W	NA	2.16993	2.32193	0.321928	3.70044	3.16993	FALSE	FALSE	FALSE	FALSE	FALSE	FALSE
YBR098W	3.16993	2.16993	1.66297	2.32193	3.70044	0.847997	FALSE	FALSE	FALSE	FALSE	FALSE	FALSE
YBR101C	1.20163	1.1375	3.04439	1.70044	1.66985	1.20163	FALSE	FALSE	FALSE	FALSE	FALSE	FALSE
YBR102C	0.0641303	0.514573	-0.106915	-0.459432	-0.157541	0.0995357	TRUE	FALSE	TRUE	FALSE	TRUE	FALSE
YBR103W	-0.765535	0.347923	-0.263034	-2	-2.58496	0.415037	FALSE	FALSE	FALSE	FALSE	FALSE	FALSE
YBR104W	0.137504	NA	2.58496	NA	1.1375	0	FALSE	FALSE	FALSE	FALSE	FALSE	FALSE
YBR105C	1.78427	1.51457	2.82597	1.92961	3.0915	1.79862	TRUE	TRUE	TRUE	TRUE	TRUE	TRUE
YBR106W	3.66613	3.27645	3.672	3.22239	4.16695	3.26303	TRUE	TRUE	TRUE	TRUE	TRUE	TRUE
YBR107C	2	NA	-0.415037	0.415037	1	1	FALSE	FALSE	FALSE	FALSE	FALSE	FALSE
YBR108W	1.96347	0.559427	0.691878	2.20163	1.36923	0.415037	FALSE	FALSE	FALSE	FALSE	FALSE	TRUE
YBR109C	2.43741	2.15528	1.71621	1.58496	2.66676	2.72792	FALSE	FALSE	TRUE	FALSE	TRUE	FALSE
YBR110W	2.32193	-0.289507	1.45943	1.32193	1.58496	0.807355	FALSE	FALSE	FALSE	FALSE	FALSE	FALSE
YBR111C	-6.06609	-4.82443	-3.63559	-5.58496	-2.83872	-3.03562	FALSE	FALSE	FALSE	FALSE	FALSE	FALSE
YBR111W-A	-3.36923	-2.08746	-1.44478	-3.05889	-1	-1.79751	FALSE	FALSE	FALSE	FALSE	TRUE	TRUE
YBR111W-A	NA	NA	NA	NA	NA	NA	FALSE	FALSE	FALSE	FALSE	FALSE	FALSE
YBR111W-A	NA	NA	NA	NA	NA	NA	FALSE	FALSE	FALSE	FALSE	FALSE	FALSE
YBR112C	1.50696	1.56071	1.49476	1.04182	1.39734	1.848	TRUE	TRUE	TRUE	FALSE	TRUE	TRUE
YBR114W	-0.917538	-0.152003	-0.475338	-0.526069	-0.557995	0.371969	TRUE	TRUE	TRUE	TRUE	TRUE	TRUE
YBR115C	2.67807	3.80735	3.52356	NA	5.04439	NA	FALSE	FALSE	FALSE	FALSE	FALSE	FALSE
YBR117C	1	0.669355	NA	0.584963	2	0.598902	FALSE	TRUE	FALSE	TRUE	FALSE	TRUE
YBR118W	-1.79684	-1.45251	-1.34645	-1.09894	-1.25793	-1.04385	TRUE	TRUE	TRUE	TRUE	TRUE	TRUE
YBR119W	4.24793	2	3.32193	2.16993	2.70044	3.06609	FALSE	FALSE	FALSE	FALSE	FALSE	FALSE
YBR119W	NA	NA	NA	NA	NA	NA	FALSE	FALSE	FALSE	FALSE	FALSE	FALSE
YBR120C	-1.65208	-2.20945	-2.48543	-1.67807	-1.47393	-3.24793	FALSE	FALSE	FALSE	FALSE	FALSE	FALSE
YBR121C	1.30968	0.752072	1.31431	1.11247	1.34445	0.989508	TRUE	TRUE	TRUE	TRUE	TRUE	TRUE
YBR122C	0.0671142	-1.22239	-0.241008	-1.45943	0.280108	-0.602665	TRUE	FALSE	TRUE	FALSE	TRUE	TRUE
YBR123C	2.05063	1.73697	3.5025	NA	3.8413	5.39232	FALSE	FALSE	FALSE	FALSE	FALSE	FALSE
YBR125C	1.41504	0.70044	-1.58496	0.584963	0.36257	-1.11548	FALSE	FALSE	FALSE	FALSE	FALSE	FALSE
YBR126C	-0.131245	-0.543443	0.302563	-0.728698	-0.197939	-0.355659	TRUE	TRUE	TRUE	TRUE	TRUE	TRUE
YBR127C	0.163499	0.768674	0.878694	0.602665	0.723482	0.716207	TRUE	TRUE	TRUE	TRUE	TRUE	TRUE
YBR128C	1.58496	2.05889	NA	NA	0	1.22239	FALSE	FALSE	FALSE	FALSE	FALSE	FALSE
YBR129C	2.70044	1.16993	2.1375	0.736966	2	1.58496	FALSE	FALSE	FALSE	FALSE	FALSE	FALSE
YBR130C	3	1.73697	1.69188	1.90689	3.60881	0.770518	FALSE	FALSE	FALSE	FALSE	FALSE	FALSE
YBR131W	1.73697	NA	2.32193	NA	4.64386	1	FALSE	FALSE	FALSE	FALSE	FALSE	FALSE
YBR132C	-0.678072	-1.32193	0.192645	-1.73697	-1.11548	-1.05889	FALSE	FALSE	FALSE	FALSE	FALSE	FALSE
YBR133C	-0.652077	-1.58496	0.584963	1.32193	0	-0.36257	FALSE	FALSE	FALSE	FALSE	FALSE	FALSE
YBR135W	-0.695145	-0.874469	-1.41504	-0.584963	-1.0614	-0.678072	TRUE	FALSE	FALSE	FALSE	TRUE	FALSE
YBR136W	2.70044	2.11548	2.45943	3.32193	2.70044	NA	FALSE	FALSE	FALSE	FALSE	FALSE	FALSE
YBR137W	-0.70044	-2.22239	-0.289507	0	-1.19265	-0.222392	FALSE	FALSE	FALSE	FALSE	FALSE	FALSE
YBR138C	0.736966	1.58496	1.58496	0.222392	2.32193	1.22239	FALSE	FALSE	FALSE	FALSE	FALSE	FALSE
YBR139W	-0.584963	-2.16993	-0.584963	-1.73697	-3.32193	-0.893085	FALSE	FALSE	FALSE	FALSE	FALSE	FALSE
YBR140C	1.65208	0.830075	2.41504	0.263034	1.90689	3.52356	FALSE	FALSE	FALSE	FALSE	FALSE	FALSE
YBR141C	1.52356	1	1.80735	0.584963	1.32193	-1	FALSE	FALSE	FALSE	FALSE	FALSE	FALSE
YBR142W	-0.540568	NA	1.36257	1	0.862496	0	FALSE	FALSE	FALSE	FALSE	FALSE	FALSE
YBR143C	2.14296	2.60881	2.38904	1.72583	2.78022	1.78427	TRUE	FALSE	TRUE	FALSE	TRUE	FALSE
YBR145W	-2.08746	0	-1.58496	-1.58496	-0.169925	-0.415037	FALSE	FALSE	FALSE	FALSE	FALSE	FALSE
YBR146W	1.85798	2.22239	2.5025	1.58496	3.29278	1.35364	FALSE	FALSE	FALSE	FALSE	FALSE	FALSE
YBR147W	2	-0.137504	1.32193	-1	0	-0.222392	FALSE	FALSE	FALSE	FALSE	FALSE	FALSE
YBR148W	NA	NA	NA	NA	NA	NA	FALSE	FALSE	FALSE	FALSE	FALSE	FALSE
YBR149W	1.05889	1.24793	1.48543	1.09954	3.24793	1.33184	FALSE	TRUE	FALSE	FALSE	FALSE	TRUE
YBR150C	2.1375	2.51785	4.08746	3.30117	2.67243	2.92057	FALSE	TRUE	FALSE	FALSE	FALSE	TRUE
YBR151W	-1.75743	-0.92785	-2.7625	-0.921997	-1.23704	-1.07595	TRUE	TRUE	FALSE	FALSE	TRUE	TRUE
YBR152W	-0.632268	-0.180572	0.211504	0	0.263034	-0.436099	TRUE	FALSE	FALSE	FALSE	TRUE	FALSE
YBR153W	-1.48543	-2	-1	-0.321928	-1.32193	0.192645	FALSE	FALSE	FALSE	FALSE	FALSE	FALSE
YBR154C	0.138605	-0.415037	0.206451	0	0.584963	0.354665	TRUE	TRUE	TRUE	TRUE	TRUE	TRUE
YBR155W	2.45943	2.32193	3.64386	NA	2.88264	1.22239	FALSE	FALSE	FALSE	FALSE	FALSE	FALSE
YBR156C	1.75489	2.70044	3.20163	NA	2.42626	2.58496	FALSE	FALSE	FALSE	FALSE	FALSE	FALSE
YBR157C	1.88753	2.80735	1.69188	2.80735	1.73697	0.807355	TRUE	FALSE	FALSE	FALSE	FALSE	FALSE
YBR158W	-0.0901978	-0.180572	-0.0901978	-0.459432	0.514573	0.777608	TRUE	FALSE	TRUE	FALSE	TRUE	FALSE
YBR159W	3.77259	0.874469	2.22239	0.893085	3.16993	1.45943	FALSE	FALSE	FALSE	FALSE	FALSE	FALSE
YBR160W	-0.392317	-0.938599	-0.514573	0.807355	-0.758992	-1.078	FALSE	FALSE	FALSE	FALSE	FALSE	FALSE
YBR161W	1.41504	0.954196	2.11548	0.559427	1	0.0780025	FALSE	FALSE	FALSE	FALSE	FALSE	TRUE
YBR162C	0.111031	1.09954	2.26303	1.16993	0.563901	0.371969	TRUE	FALSE	FALSE	FALSE	TRUE	FALSE
YBR162W-A	2.17201	1.47805	2.17158	1.85086	2.39768	1.92785	TRUE	TRUE	TRUE	TRUE	TRUE	TRUE
YBR163W	NA	NA	1	NA	-1.32193	0	FALSE	FALSE	FALSE	FALSE	FALSE	FALSE
YBR164C	1.52838	1.30485	1.96829	3.20163	2.88452	1.63005	TRUE	FALSE	TRUE	FALSE	FALSE	TRUE
YBR165W	0	1.41504	-1.58496	0.485427	-3.32193	2.16993	FALSE	FALSE	FALSE	FALSE	FALSE	FALSE
YBR166C	5.2854	1.22239	2.04439	1.58496	1.45943	2.32193	FALSE	FALSE	FALSE	FALSE	FALSE	FALSE
YBR167C	2.96347	4.04439	2.58496	3.45943	4.70044	2.74723	FALSE	FALSE	FALSE	FALSE	FALSE	FALSE
YBR168W	1.58496	0.847997	2.58496	-1	-1.80735	0.584963	FALSE	FALSE	FALSE	FALSE	FALSE	FALSE
YBR169C	0.0995357	-0.509014	2.05063	0.514573	0.415037	0.146841	FALSE	TRUE	FALSE	FALSE	FALSE	TRUE
YBR170C	0.398549	0.0703893	1.76081	2.16993	0.526069	0.807355	TRUE	TRUE	FALSE	FALSE	TRUE	TRUE
YBR171W	-0.736966	-1.19794	0	0.289507	-0.110424	-0.388565	TRUE	FALSE	TRUE	FALSE	TRUE	TRUE
YBR172C	1.80735	2.70044	2.9386	2	2.43296	1.19265	FALSE	FALSE	FALSE	FALSE	FALSE	FALSE
YBR173C	-0.406424	-0.8314	0.493282	-0.171766	-0.0059006	-0.508697	TRUE	TRUE	TRUE	TRUE	TRUE	TRUE
YBR175W	-0.222392	2.32193	2.24793	1	1.22239	0.514573	FALSE	FALSE	FALSE	FALSE	FALSE	FALSE
YBR176W	NA	3.32193	1	NA	NA	1	FALSE	FALSE	FALSE	FALSE	FALSE	FALSE
YBR177C	-0.125531	-0.584963	1.58496	0.459432	0.874469	0.280108	FALSE	FALSE	FALSE	FALSE	FALSE	FALSE
YBR179C	0.63743	1.87447	2.9542	3	1.32193	2.20163	FALSE	FALSE	FALSE	FALSE	FALSE	FALSE
YBR180W	NA	NA	-1	NA	NA	NA	FALSE	FALSE	FALSE	FALSE	FALSE	FALSE
YBR181C	0.825971	0.72514	1.03103	0.455679	1.03006	0.827163	TRUE	TRUE	TRUE	TRUE	TRUE	TRUE
YBR181C	NA	NA	NA	NA	NA	NA	FALSE	FALSE	FALSE	FALSE	FALSE	FALSE
YBR182C	-0.415037	0	-2	NA	0	-1	FALSE	FALSE	FALSE	FALSE	FALSE	FALSE
YBR182C-A	NA	0	NA	NA	NA	NA	FALSE	FALSE	FALSE	FALSE	FALSE	FALSE
YBR183W	1	0.63743	0.736966	2	0	1.58496	FALSE	FALSE	FALSE	FALSE	FALSE	FALSE
YBR184W	-1	1	NA	NA	NA	NA	FALSE	FALSE	FALSE	FALSE	FALSE	FALSE
YBR185C	3.11548	0.736966	1.90689	2.32193	2.71621	2.32193	FALSE	FALSE	FALSE	FALSE	FALSE	FALSE
YBR186W	NA	-1.58496	NA	NA	1.58496	NA	FALSE	FALSE	FALSE	FALSE	FALSE	FALSE
YBR186W	NA	NA	NA	NA	NA	NA	FALSE	FALSE	FALSE	FALSE	FALSE	FALSE
YBR187W	1.87447	0.514573	2	0.321928	1.54057	0.652077	FALSE	FALSE	FALSE	FALSE	FALSE	FALSE
YBR188C	-1.85798	-1.926	-2.44057	-2.39232	-1.03953	-2.24793	FALSE	FALSE	FALSE	FALSE	FALSE	FALSE
YBR189W	2.4553	2.69858	2.46428	2.97094	2.64973	2.72742	TRUE	TRUE	TRUE	TRUE	TRUE	TRUE
YBR189W	NA	NA	NA	NA	NA	NA	FALSE	FALSE	FALSE	FALSE	FALSE	FALSE
YBR191W	0.614449	0.746243	0.695145	1.09516	0.721099	0.727315	TRUE	TRUE	TRUE	TRUE	TRUE	TRUE
YBR191W	NA	NA	NA	NA	NA	NA	FALSE	FALSE	FALSE	FALSE	FALSE	FALSE
YBR192W	1.16993	NA	0.807355	1.58496	0.584963	-1.73697	FALSE	FALSE	FALSE	FALSE	FALSE	FALSE
YBR193C	1.37851	2.58496	0.415037	0.847997	1.48543	1.66297	FALSE	FALSE	FALSE	FALSE	FALSE	FALSE
YBR194W	-3.56071	-5.41785	-2.9386	-4.42626	-2.36257	-3.62449	FALSE	FALSE	FALSE	FALSE	FALSE	FALSE
YBR195C	-0.152003	-0.807355	0	-2.32193	-0.169925	-0.807355	FALSE	FALSE	FALSE	FALSE	FALSE	FALSE
YBR196C	0.387023	0.0544478	0.530515	-1.05889	0.275634	0.478047	TRUE	TRUE	TRUE	FALSE	TRUE	TRUE
YBR196C-A	NA	-2.32193	NA	NA	1	NA	FALSE	FALSE	FALSE	FALSE	FALSE	FALSE
YBR196C-B	0	NA	NA	NA	NA	NA	FALSE	FALSE	FALSE	FALSE	FALSE	FALSE
YBR197C	0.841935	1.48543	2.17509	1.32193	2.08964	1.25526	TRUE	TRUE	TRUE	FALSE	TRUE	TRUE
YBR198C	-0.868755	-0.550197	-1.40939	-1.18057	-1.21299	-0.697437	TRUE	TRUE	TRUE	FALSE	TRUE	TRUE
YBR199W	0.275634	-0.607683	0.169925	1.28951	0.912537	-0.117836	FALSE	TRUE	TRUE	FALSE	FALSE	TRUE
YBR200W	2.64386	0.584963	1.94753	3	1.37851	1.12199	FALSE	FALSE	FALSE	FALSE	FALSE	FALSE
YBR200W-A	NA	NA	NA	NA	NA	NA	FALSE	FALSE	FALSE	FALSE	FALSE	FALSE
YBR201W	-0.63743	0.222392	0.415037	1.73697	0.125531	-0.125531	FALSE	FALSE	FALSE	FALSE	FALSE	FALSE
YBR201C-A	NA	NA	0	NA	2.80735	1	FALSE	FALSE	FALSE	FALSE	FALSE	FALSE
YBR202W	2.83289	4.32193	3.8413	2.80735	5.22882	2.24793	FALSE	FALSE	FALSE	FALSE	FALSE	FALSE
YBR203W	NA	1.80735	NA	1.22239	NA	3.58496	FALSE	FALSE	FALSE	FALSE	FALSE	FALSE
YBR204C	0	1.22239	3.70044	1	2.32193	2.11548	FALSE	FALSE	FALSE	FALSE	FALSE	FALSE
YBR205W	0.459432	2	1.51457	-0.321928	1	-0.807355	FALSE	FALSE	FALSE	FALSE	FALSE	FALSE
YBR207W	2.45943	1.32193	3.45943	1.73697	1.32193	0.906891	FALSE	FALSE	FALSE	FALSE	FALSE	FALSE
YBR208C	-2.58496	NA	-1.32193	-0.736966	-1	0.678072	FALSE	FALSE	FALSE	FALSE	FALSE	FALSE
YBR210W	1	0.321928	0.943416	2.41504	1.62149	1.76553	FALSE	FALSE	FALSE	FALSE	FALSE	FALSE
YBR211C	3.32193	NA	1	2.80735	1.22239	2.32193	FALSE	FALSE	FALSE	FALSE	FALSE	FALSE
YBR212W	1.70044	1.54749	3.11548	1.58496	1.06413	2.06228	FALSE	FALSE	FALSE	FALSE	FALSE	FALSE
YBR213W	0.449803	-0.874469	0.459432	3.16993	0.596103	-0.247928	TRUE	FALSE	TRUE	FALSE	TRUE	FALSE
YBR214W	0	0.965235	0.184425	0.63005	0.247928	0.728327	TRUE	TRUE	TRUE	TRUE	TRUE	TRUE
YBR215W	1.80735	1.11548	1.26303	0.63743	2.22239	1.20163	FALSE	FALSE	FALSE	FALSE	FALSE	FALSE
YBR215W	NA	NA	NA	NA	NA	NA	FALSE	FALSE	FALSE	FALSE	FALSE	FALSE
YBR216C	1	1.1375	3.16993	1	1.66297	2.39232	FALSE	FALSE	FALSE	FALSE	FALSE	FALSE
YBR217W	1.92057	1.32193	3.10852	0.777608	3.68182	1.76553	FALSE	FALSE	FALSE	FALSE	FALSE	FALSE
YBR218C	1	2.16993	1.22239	0	2.32193	1.80735	FALSE	FALSE	FALSE	FALSE	FALSE	FALSE
YBR219C	-0.16601	-0.485427	-0.415037	-0.716207	-0.415037	-0.192645	TRUE	FALSE	TRUE	FALSE	TRUE	TRUE
YBR219C	NA	NA	NA	NA	NA	NA	FALSE	FALSE	FALSE	FALSE	FALSE	FALSE
YBR220C	NA	NA	NA	NA	NA	NA	FALSE	FALSE	FALSE	FALSE	FALSE	FALSE
YBR221C	2.39232	0.716207	1.55639	1.20163	1.6845	1.20945	FALSE	FALSE	FALSE	FALSE	FALSE	FALSE
YBR221W-A	NA	NA	NA	NA	NA	NA	FALSE	FALSE	FALSE	FALSE	FALSE	FALSE
YBR222C	2.80735	2	1	1.80735	NA	0.584963	FALSE	FALSE	FALSE	FALSE	FALSE	FALSE
YBR223C	0.830075	0.289507	-1.19265	1.87447	1.64386	-0.63743	FALSE	FALSE	FALSE	FALSE	FALSE	FALSE
YBR225W	-0.115477	-0.125531	-0.152003	-0.847997	-0.378512	-0.662965	FALSE	FALSE	FALSE	FALSE	FALSE	FALSE
YBR227C	2	NA	1	2.16993	1.08746	1	FALSE	FALSE	FALSE	FALSE	FALSE	FALSE
YBR228W	NA	-1	NA	NA	-2	-1.32193	FALSE	FALSE	FALSE	FALSE	FALSE	FALSE
YBR229C	1	0.415037	-0.485427	0.584963	2	1.22239	FALSE	FALSE	FALSE	FALSE	FALSE	FALSE
YBR230C	-0.0874628	-0.773724	0.800691	-0.860597	0.234465	-1.10692	TRUE	TRUE	TRUE	TRUE	TRUE	TRUE
YBR230C	NA	NA	NA	NA	NA	NA	FALSE	FALSE	FALSE	FALSE	FALSE	FALSE
YBR230W-A	1.58496	-0.678072	1.80735	0.485427	1.52356	1.26303	FALSE	FALSE	FALSE	FALSE	FALSE	FALSE
YBR231C	-0.184425	-1.47393	0	-0.443607	0.614109	0.120294	TRUE	TRUE	TRUE	TRUE	TRUE	TRUE
YBR233W	0.0824622	0	-0.465664	-0.678072	-0.906891	-0.678072	FALSE	FALSE	TRUE	FALSE	FALSE	FALSE
YBR233W-A	2.36257	2.22239	2.8413	1.41504	2.35364	1.32193	FALSE	FALSE	FALSE	FALSE	FALSE	FALSE
YBR234C	4.37638	2.61143	3.14975	3.01282	3.09565	3.1193	FALSE	TRUE	TRUE	FALSE	TRUE	TRUE
YBR235W	-1.32193	NA	-1	NA	-1	NA	FALSE	FALSE	FALSE	FALSE	FALSE	FALSE
YBR236C	1.58496	1.80735	4.16993	3.70044	3.26303	2.48543	FALSE	FALSE	FALSE	FALSE	FALSE	FALSE
YBR237W	0.584963	0.540568	1.078	1.58496	1.45943	0.192645	FALSE	FALSE	FALSE	FALSE	FALSE	FALSE
YBR238C	0.180572	0.222392	0.321928	0.736966	0	-1.37851	FALSE	FALSE	FALSE	FALSE	FALSE	FALSE
YBR239C	-2.70044	-1.45943	-2.37851	-1.58496	-1.06413	-0.36257	FALSE	FALSE	FALSE	FALSE	FALSE	FALSE
YBR240C	-2	0	0	-2.32193	-1.58496	-2.32193	FALSE	FALSE	FALSE	FALSE	FALSE	FALSE
YBR241C	NA	3	3.45943	0.736966	3.32193	1.41504	FALSE	FALSE	FALSE	FALSE	FALSE	FALSE
YBR242W	0.969626	1.11548	0.724366	2.22239	0.415037	0.4975	TRUE	FALSE	TRUE	FALSE	TRUE	FALSE
YBR243C	5.64386	4.24793	4.56478	NA	3.61891	5.90689	FALSE	FALSE	FALSE	FALSE	FALSE	FALSE
YBR244W	0.0740006	0.234465	0.10497	-0.459432	0.137504	0	TRUE	FALSE	TRUE	FALSE	TRUE	TRUE
YBR245C	NA	NA	NA	NA	NA	NA	FALSE	FALSE	FALSE	FALSE	FALSE	FALSE
YBR246W	0.652077	0	1.76553	2	1.05889	1.28011	FALSE	FALSE	FALSE	FALSE	FALSE	FALSE
YBR247C	1.42626	2.58496	0.881356	-1	1.10962	0.192645	FALSE	FALSE	FALSE	FALSE	FALSE	FALSE
YBR248C	1.58496	2	2.32193	0.584963	1.80735	0.736966	FALSE	FALSE	FALSE	FALSE	FALSE	FALSE
YBR249C	0.790077	0.39486	0.618571	-0.137504	1.21573	-0.185032	TRUE	TRUE	TRUE	TRUE	TRUE	TRUE
YBR250W	NA	NA	NA	NA	NA	NA	FALSE	FALSE	FALSE	FALSE	FALSE	FALSE
YBR251W	2.25376	2.20645	2.22239	2.49185	2.24793	2.24393	FALSE	FALSE	FALSE	FALSE	TRUE	FALSE
YBR252W	2.87447	3.45943	2	1.73697	4.80735	3	FALSE	FALSE	FALSE	FALSE	FALSE	FALSE
YBR253W	-0.847997	0	0.341037	2.32193	0.304855	1.41504	FALSE	FALSE	FALSE	FALSE	FALSE	FALSE
YBR254C	-2.58496	-2.32193	-2.80735	-0.736966	-1.16993	NA	FALSE	FALSE	FALSE	FALSE	FALSE	FALSE
YBR255W	1.85561	1.974	3.02554	2.58496	2.26303	3.12928	TRUE	FALSE	FALSE	FALSE	TRUE	FALSE
YBR255C-A	-0.925999	-4.52356	-0.5025	-0.807355	-0.0931094	-1.48543	FALSE	FALSE	FALSE	FALSE	FALSE	FALSE
YBR255C-A	NA	NA	NA	NA	NA	NA	FALSE	FALSE	FALSE	FALSE	FALSE	FALSE
YBR256C	0.584963	1.06413	2.32193	1.90689	2.46815	1.87447	FALSE	FALSE	FALSE	FALSE	FALSE	FALSE
YBR257W	0	2	2.45943	2.32193	1.70044	0.485427	FALSE	FALSE	FALSE	FALSE	FALSE	FALSE
YBR258C	1.80735	0	2.39232	0.584963	1	1.58496	FALSE	FALSE	FALSE	FALSE	FALSE	FALSE
YBR259W	0.415037	1	-0.222392	NA	1.58496	0.584963	FALSE	FALSE	FALSE	FALSE	FALSE	FALSE
YBR260C	NA	3.70044	4.32193	NA	4.9542	NA	FALSE	FALSE	FALSE	FALSE	FALSE	FALSE
YBR261C	-0.652077	-0.125531	-0.216811	0	-0.693897	-0.111031	TRUE	FALSE	TRUE	FALSE	TRUE	TRUE
YBR262C	3.38466	2.9386	5.91289	5.16993	4.45396	3.34239	FALSE	FALSE	FALSE	FALSE	FALSE	FALSE
YBR263W	1.09311	1.64386	1.52725	1.37851	1.87447	2.41504	FALSE	FALSE	FALSE	FALSE	FALSE	FALSE
YBR264C	2.80735	-0.584963	2.28011	3.70044	2.03953	1.39232	FALSE	FALSE	FALSE	FALSE	FALSE	FALSE
YBR265W	5.70044	3.02554	3.94251	NA	5.05528	4.1375	FALSE	FALSE	FALSE	FALSE	FALSE	FALSE
YBR267W	1.73697	NA	2.152	NA	2.91754	1	FALSE	FALSE	FALSE	FALSE	FALSE	FALSE
YBR268W	1.49476	1.58496	1.18442	2.45943	1.62803	1.80735	FALSE	FALSE	TRUE	FALSE	TRUE	FALSE
YBR269C	-0.357552	-0.306661	-0.36257	0.691878	-0.209453	0.36257	TRUE	TRUE	TRUE	TRUE	TRUE	TRUE
YBR270C	1.77761	1.70044	0.459432	1.87447	0.263034	2.27302	FALSE	FALSE	FALSE	FALSE	FALSE	FALSE
YBR271W	2.13245	0	2.16993	NA	1.94342	0.447459	FALSE	FALSE	FALSE	FALSE	FALSE	FALSE
YBR272C	0	0	2.32193	0.584963	1.16993	2.32193	FALSE	FALSE	FALSE	FALSE	FALSE	FALSE
YBR273C	2.22239	2.32193	2.9542	2.41504	2.4021	1.36257	FALSE	FALSE	FALSE	FALSE	FALSE	FALSE
YBR274W	1	-1.58496	2	NA	0	NA	FALSE	FALSE	FALSE	FALSE	FALSE	FALSE
YBR275C	-0.584963	-0.415037	0	1	3.16993	NA	FALSE	FALSE	FALSE	FALSE	FALSE	FALSE
YBR276C	3.9542	2.96963	3.83289	2.45943	2.52356	2.58496	FALSE	FALSE	FALSE	FALSE	FALSE	FALSE
YBR278W	-0.241008	-1.36257	0.387023	1.66297	-0.943416	-0.628031	FALSE	FALSE	FALSE	FALSE	FALSE	FALSE
YBR279W	0.979241	0.357552	1.41954	0.868755	1.43781	1.41504	TRUE	TRUE	TRUE	TRUE	TRUE	TRUE
YBR280C	4.52356	3.56071	4.39232	2.43296	4.24793	3.66838	FALSE	FALSE	FALSE	FALSE	FALSE	FALSE
YBR281C	NA	3.58496	4.08746	1	3.24793	3.32193	FALSE	FALSE	FALSE	FALSE	FALSE	FALSE
YBR282W	0.656046	0.584963	0.559427	1.18057	0.916168	0.0911479	TRUE	TRUE	TRUE	FALSE	TRUE	TRUE
YBR283C	0.182864	0.793549	1.22239	1.38702	1.48543	0.952694	TRUE	TRUE	TRUE	FALSE	TRUE	TRUE
YBR284W	0.584963	NA	0	NA	NA	1.58496	FALSE	FALSE	FALSE	FALSE	FALSE	FALSE
YBR285W	-1	0.70044	-0.415037	-2.70044	0.485427	-0.584963	FALSE	FALSE	FALSE	FALSE	FALSE	FALSE
YBR286W	2.0458	2.55102	2.47131	2.6009	2.76553	2.23919	TRUE	TRUE	TRUE	TRUE	TRUE	TRUE
YBR287W	1.65208	1.44746	2.15754	1.24101	2.23266	1.5025	FALSE	FALSE	FALSE	FALSE	FALSE	FALSE
YBR288C	1.80735	0	5.20945	4.08746	1.78427	2.58496	FALSE	FALSE	FALSE	FALSE	FALSE	FALSE
YBR289W	0.610053	-0.584963	1.6845	0	1.94753	0.0824622	FALSE	FALSE	FALSE	FALSE	FALSE	FALSE
YBR290W	1.03279	0.900464	1.67319	0.836501	1.57531	0.634716	TRUE	TRUE	TRUE	TRUE	TRUE	TRUE
YBR291C	0.36257	0	3.32193	1.58496	1.41504	2.58496	FALSE	FALSE	FALSE	FALSE	FALSE	FALSE
YBR293W	NA	NA	NA	NA	NA	NA	FALSE	FALSE	FALSE	FALSE	FALSE	FALSE
YBR294W	0.628031	2.80735	1.8365	2.80735	0.347923	0.584963	FALSE	FALSE	FALSE	FALSE	FALSE	FALSE
YBR295W	0	-0.192645	0.943416	2.11548	3.24793	-0.321928	FALSE	FALSE	FALSE	FALSE	FALSE	FALSE
YBR296C	NA	-1	0	-1	1.58496	NA	FALSE	FALSE	FALSE	FALSE	FALSE	FALSE
YBR296C-A	NA	NA	NA	NA	NA	NA	FALSE	FALSE	FALSE	FALSE	FALSE	FALSE
YBR297W	NA	NA	NA	NA	NA	0.584963	FALSE	FALSE	FALSE	FALSE	FALSE	FALSE
YBR298C	0	-0.736966	-2	-1.22239	-1.58496	-2.67807	FALSE	FALSE	FALSE	FALSE	FALSE	FALSE
YBR298C-A	NA	NA	NA	NA	NA	NA	FALSE	FALSE	FALSE	FALSE	FALSE	FALSE
YBR299W	NA	NA	NA	NA	NA	NA	FALSE	FALSE	FALSE	FALSE	FALSE	FALSE
YBR301W	0	NA	0	NA	-0.584963	0	FALSE	FALSE	FALSE	FALSE	FALSE	FALSE
YBR302C	NA	NA	NA	-5.04439	NA	NA	FALSE	FALSE	FALSE	FALSE	FALSE	FALSE
YCL073C	NA	NA	NA	NA	NA	NA	FALSE	FALSE	FALSE	FALSE	FALSE	FALSE
YCL069W	NA	NA	NA	NA	NA	NA	FALSE	FALSE	FALSE	FALSE	FALSE	FALSE
YCL068C	NA	NA	NA	NA	NA	NA	FALSE	FALSE	FALSE	FALSE	FALSE	FALSE
YCL067C	NA	NA	NA	NA	NA	NA	FALSE	FALSE	FALSE	FALSE	FALSE	FALSE
YCL066W	NA	NA	NA	NA	NA	NA	FALSE	FALSE	FALSE	FALSE	FALSE	FALSE
YCL064C	-0.736966	NA	2.58496	1.80735	3.39232	3.45943	FALSE	FALSE	FALSE	FALSE	FALSE	FALSE
YCL063W	1.35364	0.847997	2.58496	1	1.18442	0.847997	FALSE	FALSE	FALSE	FALSE	FALSE	FALSE
YCL061C	2.26303	0.736966	4.16993	1.32193	3.07039	1.58496	FALSE	FALSE	FALSE	FALSE	FALSE	FALSE
YCL059C	-1.22827	-1.77761	-1.67243	-1.37851	-1.35364	-4.35755	TRUE	FALSE	TRUE	FALSE	TRUE	FALSE
YCL058C	NA	1.58496	NA	NA	NA	NA	FALSE	FALSE	FALSE	FALSE	FALSE	FALSE
YCL058W-A	0.246438	-0.830075	1.13191	0.0931094	1.03279	-1.28951	TRUE	FALSE	TRUE	FALSE	TRUE	FALSE
YCL057C-A	2.36923	1.9542	2.36257	2.66297	3.03242	1.75207	FALSE	FALSE	FALSE	FALSE	FALSE	FALSE
YCL057W	-1.58496	-1	0.169925	-0.847997	-0.893085	-0.530515	FALSE	FALSE	FALSE	FALSE	FALSE	FALSE
YCL056C	1	0.222392	0	0.169925	0.584963	-0.321928	FALSE	FALSE	FALSE	FALSE	FALSE	FALSE
YCL055W	1.58496	1.90689	0.415037	1.22239	-0.0740006	0.584963	FALSE	FALSE	FALSE	FALSE	FALSE	FALSE
YCL054W	2.15754	0.584963	2.10434	NA	1.88042	1.11548	FALSE	FALSE	FALSE	FALSE	TRUE	FALSE
YCL052C	2.26303	0.552541	1.39855	2.11548	2.74723	1.42626	FALSE	FALSE	FALSE	FALSE	FALSE	FALSE
YCL051W	0.353637	0.678072	0.807355	-0.652077	0.523562	1.1375	FALSE	TRUE	FALSE	FALSE	FALSE	FALSE
YCL050C	0.345775	0.82103	0.321928	0.0506261	-0.184425	0.0280144	TRUE	TRUE	TRUE	TRUE	TRUE	TRUE
YCL049C	1.32193	3.32193	1.87447	2.80735	3	2.58496	FALSE	FALSE	FALSE	FALSE	FALSE	FALSE
YCL048W-A	-1	2.16993	NA	3.45943	NA	NA	FALSE	FALSE	FALSE	FALSE	FALSE	FALSE
YCL048W	NA	NA	NA	NA	NA	NA	FALSE	FALSE	FALSE	FALSE	FALSE	FALSE
YCL047C	2.75489	0.447459	3	1.5025	2.34792	0.866733	FALSE	FALSE	FALSE	FALSE	FALSE	FALSE
YCL045C	1.52356	2.41504	4.16993	4.64386	3.78136	5.72792	FALSE	FALSE	FALSE	FALSE	FALSE	FALSE
YCL044C	-0.765535	-0.241008	0.499571	0.371969	0.175087	0.688056	TRUE	TRUE	TRUE	FALSE	TRUE	FALSE
YCL043C	1.0217	1.29956	1.79442	1.02975	1.37587	0.882643	TRUE	TRUE	TRUE	TRUE	TRUE	TRUE
YCL042W	3.28011	2.47249	4.67948	2.63227	3.50635	2.79141	TRUE	TRUE	FALSE	FALSE	TRUE	FALSE
YCL040W	1.87869	1.00471	2.68182	1.1389	2.3152	1.71969	TRUE	TRUE	TRUE	TRUE	TRUE	TRUE
YCL039W	2.5025	0.14439	4.39232	-0.584963	2	-0.584963	FALSE	FALSE	FALSE	FALSE	FALSE	FALSE
YCL038C	1	-2	NA	1.58496	NA	NA	FALSE	FALSE	FALSE	FALSE	FALSE	FALSE
YCL037C	-0.408085	-1.34395	-0.778973	-0.103093	-0.70044	-0.17897	TRUE	FALSE	TRUE	TRUE	TRUE	TRUE
YCL036W	0.615336	2	0.799701	0	1.64386	0.736966	TRUE	FALSE	TRUE	FALSE	TRUE	FALSE
YCL035C	0.345775	0.326501	0.172181	0.36257	0.567041	0.194816	TRUE	TRUE	TRUE	TRUE	TRUE	TRUE
YCL034W	5.06609	2.43741	3.25376	1.5502	4.00998	2.38702	FALSE	FALSE	FALSE	FALSE	FALSE	FALSE
YCL033C	-4.55459	NA	-3.37851	-4.90689	-4.22882	-5.52356	FALSE	FALSE	FALSE	FALSE	FALSE	FALSE
YCL032W	2.28011	1.48543	1.65208	3.41504	1.82103	2.28011	FALSE	FALSE	FALSE	FALSE	FALSE	FALSE
YCL031C	2.41504	1.57154	2.75161	2.37851	2.6746	2.74935	TRUE	TRUE	TRUE	TRUE	TRUE	TRUE
YCL030C	-1.54749	-3.45943	-1.44057	-0.736966	-1.51937	-1.80735	FALSE	FALSE	FALSE	FALSE	FALSE	FALSE
YCL029C	1.76553	2.70044	2.29278	3.58496	1.19265	3.05889	FALSE	FALSE	FALSE	FALSE	TRUE	FALSE
YCL028W	1.32193	2.80735	3.08746	4.24793	NA	1.16993	FALSE	FALSE	FALSE	FALSE	FALSE	FALSE
YCL027W	1.80735	1	2.05063	3.90689	3.11548	3.58496	FALSE	FALSE	FALSE	FALSE	FALSE	FALSE
YCL026C-B	0	-2.32193	1.58496	0	0.678072	-0.321928	FALSE	FALSE	FALSE	FALSE	FALSE	FALSE
YCL026C-A	NA	NA	NA	NA	NA	NA	FALSE	FALSE	FALSE	FALSE	FALSE	FALSE
YCL025C	2.45943	1.85244	4.26053	1.75899	2.54844	2.19794	FALSE	FALSE	FALSE	FALSE	TRUE	FALSE
YCL024W	1.32193	1	1.58496	0	0.584963	NA	FALSE	FALSE	FALSE	FALSE	FALSE	FALSE
YCL021W-A	0.70044	NA	1.80735	1.32193	0.678072	0	FALSE	FALSE	FALSE	FALSE	FALSE	FALSE
YCL018W	NA	NA	NA	NA	NA	NA	FALSE	FALSE	FALSE	FALSE	FALSE	FALSE
YCL017C	0.830075	1	0.888969	0.387023	0.736966	-0.125531	TRUE	FALSE	TRUE	FALSE	TRUE	TRUE
YCL016C	-0.736966	0	0.459432	0.584963	0.280108	1.58496	FALSE	FALSE	FALSE	FALSE	FALSE	FALSE
YCL014W	0	3.16993	0.36257	NA	-0.584963	1.32193	FALSE	FALSE	FALSE	FALSE	FALSE	FALSE
YCL012C	-1.04182	-0.552541	0.0374747	-1.36257	0.0384741	-0.514573	FALSE	FALSE	TRUE	FALSE	TRUE	TRUE
YCL012C	NA	NA	NA	NA	NA	NA	FALSE	FALSE	FALSE	FALSE	FALSE	FALSE
YCL011C	1.72935	1.65025	2.30485	1.45943	2.45017	1.6893	TRUE	TRUE	TRUE	TRUE	TRUE	TRUE
YCL010C	-0.398549	-0.0995357	-0.197939	0.0703893	0.289507	-0.160465	TRUE	FALSE	TRUE	TRUE	TRUE	TRUE
YCL009C	1.98751	1.34239	2.27053	2.11548	2.32193	2.54889	TRUE	TRUE	TRUE	FALSE	TRUE	TRUE
YCL008C	0.917538	-0.341037	0	1.19265	0.900464	0	FALSE	FALSE	FALSE	FALSE	FALSE	FALSE
YCL005W-A	0.271302	-0.263034	1.152	0.249978	1.01838	0.807355	TRUE	TRUE	TRUE	TRUE	TRUE	TRUE
YCL005W-A	NA	NA	NA	NA	NA	NA	FALSE	FALSE	FALSE	FALSE	FALSE	FALSE
YCL005W-A	NA	NA	NA	NA	NA	NA	FALSE	FALSE	FALSE	FALSE	FALSE	FALSE
YCL005W	2.58496	NA	1.58496	NA	1	3	FALSE	FALSE	FALSE	FALSE	FALSE	FALSE
YCL004W	0.807355	1.16993	0.584963	1.58496	1.32193	1.80735	FALSE	FALSE	FALSE	FALSE	FALSE	FALSE
YCL002C	3.41504	NA	4.24793	3.80735	4.97728	5.85798	FALSE	FALSE	FALSE	FALSE	FALSE	FALSE
YCL002C	NA	NA	NA	NA	NA	NA	FALSE	FALSE	FALSE	FALSE	FALSE	FALSE
YCL001W	4.70044	1.71621	2.10852	2.32193	2.83289	1.77259	FALSE	FALSE	FALSE	FALSE	FALSE	FALSE
YCL001W-A	NA	NA	NA	NA	NA	NA	FALSE	FALSE	FALSE	FALSE	FALSE	FALSE
YCL001W-B	NA	NA	-2	NA	-1	-1.58496	FALSE	FALSE	FALSE	FALSE	FALSE	FALSE
YCR002C	-1.34395	-1.52356	-1.09954	-0.777608	-0.561879	-0.505235	TRUE	FALSE	TRUE	FALSE	TRUE	TRUE
YCR003W	0.777608	-0.222392	1.32193	1.73697	0	0.917538	FALSE	FALSE	FALSE	FALSE	TRUE	FALSE
YCR004C	2.45943	1.58496	1.90689	2	1.43296	2.28011	FALSE	FALSE	FALSE	FALSE	FALSE	FALSE
YCR005C	-1.81749	-1.80192	-1.41363	-1.55459	-1.3226	-1.33639	TRUE	TRUE	TRUE	TRUE	TRUE	TRUE
YCR007C	0.0840643	0.836501	0.536753	1.44746	0.711495	0.389947	TRUE	FALSE	TRUE	FALSE	TRUE	TRUE
YCR008W	-0.822213	-1.25277	-1.0651	-1.03037	-1.17991	-0.828888	TRUE	TRUE	TRUE	TRUE	TRUE	TRUE
YCR009C	1.12553	0.77259	0.648528	0.971986	0.675565	0.938599	TRUE	TRUE	TRUE	TRUE	TRUE	TRUE
YCR010C	NA	NA	NA	NA	NA	NA	FALSE	FALSE	FALSE	FALSE	FALSE	FALSE
YCR011C	1.67807	1.49476	4	3.45943	2.43296	4.35755	FALSE	FALSE	FALSE	FALSE	FALSE	FALSE
YCR012W	0.0861566	-0.0975553	-0.0633621	-0.41055	0.155278	-0.142019	TRUE	TRUE	TRUE	TRUE	TRUE	TRUE
YCR014C	3.16993	0.807355	NA	1	NA	1.73697	FALSE	FALSE	FALSE	FALSE	FALSE	FALSE
YCR015C	3.16993	1.58496	2.70044	NA	0.63743	0.807355	FALSE	FALSE	FALSE	FALSE	FALSE	FALSE
YCR016W	-0.0544478	-0.584963	0.29956	0.263034	1.06711	-1.73697	TRUE	FALSE	TRUE	FALSE	TRUE	FALSE
YCR017C	3.70044	2.45943	2	3.45943	4.24793	NA	FALSE	FALSE	FALSE	FALSE	FALSE	FALSE
YCR018C	NA	NA	NA	NA	NA	NA	FALSE	FALSE	FALSE	FALSE	FALSE	FALSE
YCR019W	-0.137504	-2.32193	-0.807355	-2	1.26303	0.415037	FALSE	FALSE	FALSE	FALSE	FALSE	FALSE
YCR020C	1.19265	2.53605	1.26303	1.76553	2.37851	2.24793	FALSE	FALSE	FALSE	FALSE	FALSE	FALSE
YCR020C-A	0.900464	0.925999	2.974	2.32193	2.45943	0.341037	FALSE	FALSE	FALSE	FALSE	FALSE	FALSE
YCR020W-B	0.206451	1.39232	2.20163	0.847997	1.90689	1.07039	FALSE	FALSE	FALSE	FALSE	FALSE	FALSE
YCR021C	1.45943	0.678072	1	-2.32193	1.51457	-0.192645	FALSE	FALSE	FALSE	FALSE	FALSE	FALSE
YCR023C	1.58496	2.80735	1.58496	1	3	0	FALSE	FALSE	FALSE	FALSE	FALSE	FALSE
YCR024C	3.08746	2.32193	-0.830075	0	0.652077	0.765535	FALSE	FALSE	FALSE	FALSE	FALSE	FALSE
YCR024C-B	2.06228	2.12711	2.08406	1.62803	1.53727	2.1375	TRUE	FALSE	TRUE	FALSE	TRUE	TRUE
YCR024C-A	1.85798	1.14543	1.66985	1.4021	1.64245	1.15612	TRUE	TRUE	TRUE	FALSE	TRUE	TRUE
YCR026C	-1.41504	-2.27302	-1.22239	-2.39232	-1	-1.83007	FALSE	FALSE	FALSE	FALSE	FALSE	FALSE
YCR027C	1.20163	1.848	1.32193	1.45943	0.559427	1.32193	FALSE	FALSE	FALSE	FALSE	FALSE	FALSE
YCR028C	NA	0	3	-1	1	3	FALSE	FALSE	FALSE	FALSE	FALSE	FALSE
YCR028C-A	-1.10692	-0.584963	0.0931094	-1	-0.321928	-1	FALSE	FALSE	FALSE	FALSE	TRUE	FALSE
YCR028C-A	NA	NA	NA	NA	NA	NA	FALSE	FALSE	FALSE	FALSE	FALSE	FALSE
YCR030C	1	-0.584963	-2.58496	-0.415037	-0.263034	-0.584963	FALSE	FALSE	FALSE	FALSE	FALSE	FALSE
YCR031C	0.599609	0.76275	1.11713	0.664816	1.48125	1.40956	TRUE	TRUE	TRUE	TRUE	TRUE	TRUE
YCR031C	NA	NA	NA	NA	NA	NA	FALSE	FALSE	FALSE	FALSE	FALSE	FALSE
YCR032W	0.415037	-2	-2	-2	NA	-2.11548	FALSE	FALSE	FALSE	FALSE	FALSE	FALSE
YCR033W	-2.93546	-3.83458	-2.5979	-3.1177	-2.41954	-3.18982	TRUE	TRUE	TRUE	TRUE	TRUE	TRUE
YCR034W	0.688056	0	0.656046	0.5025	0.449307	0.378512	TRUE	FALSE	TRUE	FALSE	TRUE	TRUE
YCR035C	0.710493	0.415037	1.53051	0.485427	1.63227	1.48543	FALSE	FALSE	FALSE	FALSE	FALSE	FALSE
YCR036W	0.0824622	-0.36257	1.14684	0.137504	0.544321	0.473931	FALSE	FALSE	FALSE	FALSE	TRUE	FALSE
YCR037C	-0.847997	-0.530515	-0.321928	2.80735	-1.65208	0.736966	FALSE	FALSE	FALSE	FALSE	FALSE	FALSE
YCR038C	5.2854	5.08746	4.32193	NA	4.04439	NA	FALSE	FALSE	FALSE	FALSE	FALSE	FALSE
YCR039C	NA	NA	NA	NA	NA	NA	FALSE	FALSE	FALSE	FALSE	FALSE	FALSE
YCR040W	NA	NA	NA	NA	NA	NA	FALSE	FALSE	FALSE	FALSE	FALSE	FALSE
YCR042C	0.550197	0.722466	1.66742	0.584963	1.07529	0.807355	TRUE	TRUE	FALSE	FALSE	TRUE	TRUE
YCR043C	1.37851	-0.125531	1.71621	3.45943	1.19265	1.65208	FALSE	FALSE	FALSE	FALSE	FALSE	FALSE
YCR044C	-2.11548	-3	-0.280108	-1.22239	-0.452512	-1.51457	FALSE	FALSE	FALSE	FALSE	FALSE	FALSE
YCR045C	NA	NA	NA	NA	NA	NA	FALSE	FALSE	FALSE	FALSE	FALSE	FALSE
YCR046C	1.32193	1.97199	2.07241	1.29546	2.1078	1.49033	TRUE	FALSE	TRUE	TRUE	TRUE	TRUE
YCR047C	0.426265	1.58496	0.402098	0.321928	0.656046	0.222392	TRUE	FALSE	TRUE	FALSE	TRUE	FALSE
YCR048W	1.53605	1.80735	2.40372	1.75002	2.72437	1.69032	TRUE	FALSE	TRUE	FALSE	TRUE	TRUE
YCR050C	NA	NA	NA	NA	NA	NA	FALSE	FALSE	FALSE	FALSE	FALSE	FALSE
YCR051W	0.229482	-0.247928	0.787006	0	1.21539	0.214125	TRUE	FALSE	TRUE	TRUE	TRUE	TRUE
YCR052W	1.54597	2.71272	2.18057	2.5502	2.65344	2.40808	TRUE	FALSE	TRUE	FALSE	TRUE	FALSE
YCR053W	0.652077	0	1.63077	1.078	1.66297	1.19794	TRUE	FALSE	TRUE	FALSE	TRUE	FALSE
YCR054C	-1.07039	0.584963	0.628031	-0.321928	0.247928	-0.36257	FALSE	FALSE	FALSE	FALSE	FALSE	FALSE
YCR057C	3.44478	NA	3.74723	3.16993	5.20945	2.80735	FALSE	FALSE	FALSE	FALSE	FALSE	FALSE
YCR059C	1.54057	1.58496	3.13245	4	3.36565	2.28951	TRUE	FALSE	FALSE	FALSE	FALSE	FALSE
YCR060W	2.29278	1	2.86942	2.5025	2.62449	1.51457	FALSE	FALSE	FALSE	FALSE	FALSE	FALSE
YCR061W	0.736966	0.222392	NA	1	0	1.36257	FALSE	FALSE	FALSE	FALSE	FALSE	FALSE
YCR063W	1.32193	3.32193	0.736966	2.32193	2.54432	2.32193	FALSE	FALSE	FALSE	FALSE	FALSE	FALSE
YCR065W	0.222392	0.452512	0.0892673	0.400538	-0.117836	0.133267	TRUE	TRUE	TRUE	TRUE	TRUE	TRUE
YCR066W	2.75489	4.52356	2.36923	1.80735	3.49185	5.16993	FALSE	FALSE	FALSE	FALSE	FALSE	FALSE
YCR067C	1.77761	-0.765535	-0.289507	0.192645	0.115477	0.0931094	FALSE	FALSE	FALSE	FALSE	FALSE	FALSE
YCR068W	-1.26303	-0.341037	0.459432	-0.222392	-0.765535	-0.222392	FALSE	FALSE	FALSE	FALSE	FALSE	FALSE
YCR069W	2.39993	2.41143	2.10434	2.38904	2.36565	1.74193	FALSE	TRUE	TRUE	TRUE	TRUE	TRUE
YCR071C	2.20163	1.24793	2.79256	1.28951	2.90689	3.67243	FALSE	FALSE	FALSE	FALSE	FALSE	FALSE
YCR072C	1	NA	1.80735	0	1.73697	1	FALSE	FALSE	FALSE	FALSE	FALSE	FALSE
YCR073C	-1	0	-2	NA	-1	NA	FALSE	FALSE	FALSE	FALSE	FALSE	FALSE
YCR073W-A	0.485427	-1	1.45943	0.63743	1.926	1	FALSE	FALSE	FALSE	FALSE	FALSE	FALSE
YCR075C	-2	0.584963	1.58496	NA	NA	1.41504	FALSE	FALSE	FALSE	FALSE	FALSE	FALSE
YCR075W-A	1.926	1	2.80735	1.41504	2.9542	0.917538	FALSE	FALSE	FALSE	FALSE	FALSE	FALSE
YCR076C	-1.32193	-0.847997	0.387023	-0.485427	1.11548	0.932886	FALSE	FALSE	FALSE	FALSE	FALSE	FALSE
YCR077C	2.59585	1.81444	3.10692	2.98606	NA	NA	TRUE	TRUE	TRUE	FALSE	FALSE	FALSE
YCR079W	2.87447	5.16993	4.20945	4.12928	2.11548	4.67243	FALSE	FALSE	FALSE	FALSE	FALSE	FALSE
YCR081W	2.54432	5.01495	3.13386	4.55459	3.16993	4.24793	FALSE	FALSE	FALSE	FALSE	FALSE	FALSE
YCR082W	0.871676	0.697437	1.81558	0.747234	1.95777	1.32193	TRUE	TRUE	TRUE	TRUE	TRUE	TRUE
YCR083W	1.63743	-0.378512	0.29956	-0.222392	0.29956	0.341037	FALSE	FALSE	FALSE	FALSE	FALSE	FALSE
YCR084C	0.514573	-0.0780025	-0.234465	-0.247928	0.358454	0.426265	TRUE	FALSE	TRUE	FALSE	TRUE	TRUE
YCR086W	1	1.58496	0	2.80735	0.584963	-0.415037	FALSE	FALSE	FALSE	FALSE	FALSE	FALSE
YCR087C-A	0.629632	0.893085	1.5656	1.36257	1.67423	1.0614	TRUE	FALSE	TRUE	FALSE	TRUE	TRUE
YCR088W	0.280108	0.206451	0.672425	0.947533	0.955606	0.736966	TRUE	TRUE	TRUE	FALSE	TRUE	TRUE
YCR089W	0	-0.584963	-0.263034	0	2.80735	-0.736966	FALSE	FALSE	FALSE	FALSE	FALSE	FALSE
YCR090C	1	2.58496	0.115477	-1	0.321928	0.584963	FALSE	FALSE	FALSE	FALSE	FALSE	FALSE
YCR091W	2.58496	2.11548	2.32193	0.321928	2.58496	3.05889	FALSE	FALSE	FALSE	FALSE	FALSE	FALSE
YCR092C	-0.906891	-1.32193	0.241008	-1	0.241008	-2.80735	FALSE	FALSE	FALSE	FALSE	FALSE	FALSE
YCR093W	1.36257	1.76553	1.9349	0.830075	1.49476	1.33342	TRUE	FALSE	FALSE	FALSE	TRUE	TRUE
YCR094W	2.70044	1.32193	2.24793	0.584963	1.90689	2.45943	FALSE	FALSE	FALSE	FALSE	FALSE	FALSE
YCR095C	1.70044	0.847997	1.29546	3.08746	3.32193	2.26303	FALSE	FALSE	FALSE	FALSE	FALSE	FALSE
YCR095W-A	1	-1.73697	-1	0	-1.32193	-0.807355	FALSE	FALSE	FALSE	FALSE	FALSE	FALSE
YCR096C	NA	NA	NA	NA	NA	NA	FALSE	FALSE	FALSE	FALSE	FALSE	FALSE
YCR097W	-4.39232	-5.04439	-4.64386	NA	-4.26679	-5.33985	FALSE	FALSE	FALSE	FALSE	FALSE	FALSE
YCR097W	NA	NA	NA	NA	NA	NA	FALSE	FALSE	FALSE	FALSE	FALSE	FALSE
YCR097W	NA	NA	NA	NA	NA	NA	FALSE	FALSE	FALSE	FALSE	FALSE	FALSE
YCR098C	NA	NA	NA	NA	NA	NA	FALSE	FALSE	FALSE	FALSE	FALSE	FALSE
YCR099C	-2	-0.263034	-1	-0.415037	-1.58496	-0.415037	FALSE	FALSE	FALSE	FALSE	FALSE	FALSE
YCR100C	0	2	2	1	NA	-1	FALSE	FALSE	FALSE	FALSE	FALSE	FALSE
YCR101C	NA	-2.73697	NA	NA	-1.16993	-2.87447	FALSE	FALSE	FALSE	FALSE	FALSE	FALSE
YCR102C	NA	NA	-1.58496	NA	NA	NA	FALSE	FALSE	FALSE	FALSE	FALSE	FALSE
YCR104W	NA	NA	NA	NA	NA	NA	FALSE	FALSE	FALSE	FALSE	FALSE	FALSE
YCR105W	NA	NA	NA	NA	NA	NA	FALSE	FALSE	FALSE	FALSE	FALSE	FALSE
YCR106W	2.32193	0	1.32193	NA	1.80735	1.58496	FALSE	FALSE	FALSE	FALSE	FALSE	FALSE
YCR107W	1	NA	-1.58496	NA	0	NA	FALSE	FALSE	FALSE	FALSE	FALSE	FALSE
YCR108C	NA	NA	NA	NA	NA	NA	FALSE	FALSE	FALSE	FALSE	FALSE	FALSE
YDL248W	-0.494765	-1.44057	0.857981	-0.280108	0.334419	0	TRUE	FALSE	TRUE	FALSE	TRUE	TRUE
YDL247W	NA	-1	NA	NA	-1.58496	-0.584963	FALSE	FALSE	FALSE	FALSE	FALSE	FALSE
YDL246C	NA	NA	NA	NA	0	NA	FALSE	FALSE	FALSE	FALSE	FALSE	FALSE
YDL245C	NA	NA	NA	NA	NA	NA	FALSE	FALSE	FALSE	FALSE	FALSE	FALSE
YDL244W	NA	NA	NA	NA	NA	NA	FALSE	FALSE	FALSE	FALSE	FALSE	FALSE
YDL243C	0	NA	NA	NA	0	-1.58496	FALSE	FALSE	FALSE	FALSE	FALSE	FALSE
YDL241W	-0.906891	-0.847997	1.07039	-1	-0.334419	-0.777608	FALSE	FALSE	FALSE	FALSE	TRUE	FALSE
YDL240W	1.29546	3.52356	1.18057	1.58496	1.926	1.45943	FALSE	FALSE	FALSE	FALSE	FALSE	FALSE
YDL239C	-1.58496	0	-0.321928	-1.16993	1	0.847997	FALSE	FALSE	FALSE	FALSE	FALSE	FALSE
YDL238C	0	0.222392	0	0.736966	NA	-0.192645	FALSE	FALSE	FALSE	FALSE	FALSE	FALSE
YDL237W	1.58496	0.36257	1.73697	0.917538	1.83289	0.719892	FALSE	FALSE	FALSE	FALSE	FALSE	FALSE
YDL236W	NA	NA	1.22239	-1	2	0.584963	FALSE	FALSE	FALSE	FALSE	FALSE	FALSE
YDL235C	1	1.22239	3.16993	3.70044	3.24793	4.24793	FALSE	FALSE	FALSE	FALSE	FALSE	FALSE
YDL234C	0.640458	0.106915	1.9386	0.584963	1.29639	0.78136	TRUE	TRUE	TRUE	FALSE	TRUE	TRUE
YDL233W	3.80735	3.64386	2.36257	2.04439	4.55459	3.04439	FALSE	FALSE	FALSE	FALSE	FALSE	FALSE
YDL232W	2.61891	1.58496	3.5025	4.02975	3.16993	2.48239	FALSE	FALSE	FALSE	FALSE	FALSE	FALSE
YDL231C	0.169925	1	0	0	0.125531	-1	FALSE	FALSE	FALSE	FALSE	FALSE	FALSE
YDL230W	0.206451	-0.289507	1.69188	0.241008	1.47999	-0.241008	FALSE	FALSE	FALSE	FALSE	FALSE	TRUE
YDL229W	1.39323	2.98489	1.56112	2.38247	1.64689	1.42999	TRUE	FALSE	TRUE	FALSE	TRUE	TRUE
YDL227C	0.204141	1.41504	0.1453	1.1375	0.439043	-0.125531	TRUE	FALSE	TRUE	FALSE	TRUE	FALSE
YDL226C	3.05311	3.04439	4.46877	2	5.02975	3.49643	FALSE	FALSE	FALSE	FALSE	FALSE	FALSE
YDL225W	-0.36257	-0.452512	0.936806	-0.485427	0.72514	-0.602665	TRUE	FALSE	TRUE	FALSE	TRUE	TRUE
YDL224C	0.836501	0.241008	0.754888	0.415037	0.719892	0.321928	FALSE	TRUE	FALSE	FALSE	FALSE	FALSE
YDL223C	1.45943	0.800131	1.34104	0.940761	1.38904	1.02519	FALSE	TRUE	FALSE	TRUE	TRUE	TRUE
YDL222C	1.18763	2.5518	1.19265	2.09433	1.28011	2.92161	FALSE	TRUE	FALSE	TRUE	FALSE	TRUE
YDL220C	1.26303	1.58496	2.9386	0.263034	4	1.48543	FALSE	FALSE	FALSE	FALSE	FALSE	FALSE
YDL219W	0.314109	-0.547488	0.0339473	-0.621488	0.444785	-0.696608	TRUE	FALSE	TRUE	FALSE	TRUE	TRUE
YDL219W	NA	NA	NA	NA	NA	NA	FALSE	FALSE	FALSE	FALSE	FALSE	FALSE
YDL218W	NA	NA	NA	NA	NA	NA	FALSE	FALSE	FALSE	FALSE	FALSE	FALSE
YDL217C	-1.32193	-1.58496	-0.192645	-1	-1	1.73697	FALSE	FALSE	FALSE	FALSE	FALSE	FALSE
YDL216C	-2	0.222392	-0.125531	1.48543	0.0780025	0.777608	FALSE	FALSE	FALSE	FALSE	FALSE	FALSE
YDL215C	NA	-1.16993	-2	-3	-0.321928	-3.70044	FALSE	FALSE	FALSE	FALSE	FALSE	FALSE
YDL214C	NA	-1	0	1.37851	NA	0.70044	FALSE	FALSE	FALSE	FALSE	FALSE	FALSE
YDL213C	-0.415037	-1.16993	0	0.125531	0.336049	-0.241008	TRUE	FALSE	TRUE	FALSE	TRUE	TRUE
YDL212W	4.85798	NA	NA	NA	3.16993	4.45943	FALSE	FALSE	FALSE	FALSE	FALSE	FALSE
YDL211C	-0.469485	0	-0.289507	1	-1	1.80735	FALSE	FALSE	FALSE	FALSE	FALSE	FALSE
YDL210W	NA	NA	NA	NA	NA	NA	FALSE	FALSE	FALSE	FALSE	FALSE	FALSE
YDL209C	1.98351	2.87447	2.79518	3.05889	3.22239	1.9386	TRUE	FALSE	FALSE	FALSE	FALSE	FALSE
YDL208W	2.98185	2.93074	3.63958	2.98606	3.60134	3.38565	TRUE	FALSE	TRUE	TRUE	TRUE	TRUE
YDL207W	2.9102	2.70044	3.21791	3.96963	3.2384	3.36257	TRUE	FALSE	TRUE	FALSE	TRUE	FALSE
YDL206W	0	-2.32193	0	NA	-1	0	FALSE	FALSE	FALSE	FALSE	FALSE	FALSE
YDL205C	-1.22239	-0.341037	-1.07039	-0.584963	-1.15754	0.0874628	FALSE	FALSE	FALSE	FALSE	FALSE	FALSE
YDL204W	-2	-2.35614	-2.45943	-1.87447	-2	-2.35199	FALSE	TRUE	FALSE	FALSE	FALSE	FALSE
YDL203C	-0.765535	-3.58496	-1.58496	-1.32193	-0.667425	-1.58496	FALSE	FALSE	FALSE	FALSE	FALSE	FALSE
YDL202W	0.5025	0.788496	1.55943	1.39232	1	0.646363	TRUE	FALSE	FALSE	FALSE	TRUE	TRUE
YDL201W	-1.02857	-2.32193	-1.10852	-1.09954	-0.697437	0.263034	TRUE	FALSE	TRUE	FALSE	TRUE	FALSE
YDL200C	-0.321928	-0.36257	1.37851	NA	-0.36257	-0.678072	FALSE	FALSE	FALSE	FALSE	FALSE	FALSE
YDL199C	0.415037	-0.0995357	3.58496	1.32193	3	0.662965	FALSE	FALSE	FALSE	FALSE	FALSE	FALSE
YDL198C	2.58496	2.58496	3.02554	3.52356	2.64909	2.64386	FALSE	FALSE	FALSE	FALSE	FALSE	FALSE
YDL197C	2.926	3.63227	2.11548	2.80735	2	2.61891	FALSE	FALSE	FALSE	FALSE	FALSE	FALSE
YDL195W	0	-1.44057	-0.584963	-1.73697	-1.58496	0.169925	FALSE	FALSE	FALSE	FALSE	FALSE	FALSE
YDL194W	2.32193	1.49476	1.80735	3.08746	2.26303	1.0614	FALSE	FALSE	FALSE	FALSE	FALSE	TRUE
YDL193W	-0.925999	-0.415037	-0.36257	-0.247928	0.0565835	-0.925999	FALSE	TRUE	FALSE	FALSE	TRUE	TRUE
YDL192W	0	1.87447	0.450661	1	0.971986	0.817136	TRUE	FALSE	TRUE	FALSE	TRUE	TRUE
YDL191W	0.393285	0.069902	0.819983	-0.10343	1.01532	-0.0208335	TRUE	TRUE	TRUE	TRUE	TRUE	TRUE
YDL191W	NA	NA	NA	NA	NA	NA	FALSE	FALSE	FALSE	FALSE	FALSE	FALSE
YDL190C	2.66297	2.16993	1.08746	1.70044	2.80735	0.917538	FALSE	FALSE	FALSE	FALSE	FALSE	FALSE
YDL189W	1.45943	0.584963	1.58496	1	1.73697	NA	FALSE	FALSE	FALSE	FALSE	FALSE	FALSE
YDL188C	-1.18057	-2.1745	-0.584963	-1.56635	-0.478047	-1.56343	TRUE	TRUE	TRUE	TRUE	TRUE	TRUE
YDL186W	NA	NA	NA	NA	NA	NA	FALSE	FALSE	FALSE	FALSE	FALSE	FALSE
YDL185W	0.39689	1.39428	0.658963	1.09954	0.5025	1.68589	TRUE	TRUE	TRUE	FALSE	TRUE	TRUE
YDL184C	0.740523	0.694911	1.49589	1.34068	1.65464	1.52878	TRUE	TRUE	TRUE	TRUE	TRUE	TRUE
YDL183C	-0.485427	-3.36923	-3.16993	-0.807355	NA	-1.5025	FALSE	FALSE	FALSE	FALSE	FALSE	FALSE
YDL182W	0.436099	0.906891	-0.115477	-0.125531	0.917538	0.807355	FALSE	FALSE	TRUE	FALSE	FALSE	FALSE
YDL181W	-0.469485	-0.258734	0.226771	-0.428843	0.584963	-0.263034	TRUE	TRUE	TRUE	TRUE	TRUE	TRUE
YDL180W	2.32193	0.584963	0	0.321928	NA	-0.415037	FALSE	FALSE	FALSE	FALSE	FALSE	FALSE
YDL179W	-0.353637	1.26303	0.0740006	0.263034	0.643856	0.736966	FALSE	FALSE	FALSE	FALSE	FALSE	FALSE
YDL178W	1.5025	1.26303	-0.131245	-1.26303	0.371969	-0.830075	FALSE	FALSE	TRUE	FALSE	FALSE	FALSE
YDL177C	1.58496	0.906891	3.16993	1.58496	0.893085	2.32193	FALSE	FALSE	FALSE	FALSE	FALSE	FALSE
YDL176W	-0.584963	2.58496	-0.415037	0	-0.415037	-1.58496	FALSE	FALSE	FALSE	FALSE	FALSE	FALSE
YDL175C	2.96347	2.58496	3.75489	4.32193	3.078	3.78136	FALSE	FALSE	FALSE	FALSE	FALSE	FALSE
YDL174C	0.628031	0.736966	1.42033	1.36257	1.71312	1.28293	TRUE	TRUE	TRUE	TRUE	TRUE	TRUE
YDL173W	1.87447	1.37851	2.9558	2.23266	2.90964	1.93643	TRUE	TRUE	TRUE	FALSE	TRUE	TRUE
YDL171C	4.08746	2.078	2.73697	0.678072	1.19265	1.05889	FALSE	FALSE	FALSE	FALSE	FALSE	FALSE
YDL170W	-2.03562	-2	-1.77761	-0.222392	-1.96683	-2	FALSE	FALSE	FALSE	FALSE	FALSE	FALSE
YDL169C	NA	3.16993	1.1375	2	1.87447	1.94753	FALSE	FALSE	FALSE	FALSE	FALSE	FALSE
YDL168W	1.04439	1.15754	2.34239	1.62803	1.81943	1.09115	FALSE	FALSE	FALSE	FALSE	FALSE	TRUE
YDL167C	0.881356	2.32193	2	NA	3.45943	NA	FALSE	FALSE	FALSE	FALSE	FALSE	FALSE
YDL166C	0.415037	0	0.353637	-1.32193	0.337035	0.485427	FALSE	FALSE	FALSE	FALSE	FALSE	FALSE
YDL165W	2.30666	1	2.52925	2.61471	2.93198	2.74723	FALSE	FALSE	TRUE	FALSE	FALSE	FALSE
YDL164C	0	1.58496	3.58496	2.32193	1.93289	3.08746	FALSE	FALSE	FALSE	FALSE	FALSE	FALSE
YDL161W	0.440573	1.44057	1.37197	0.514573	1.34792	0.125531	FALSE	FALSE	FALSE	FALSE	FALSE	FALSE
YDL160C-A	-1.80735	-2.58496	-0.847997	0.584963	-0.874469	-1.37851	FALSE	FALSE	FALSE	FALSE	FALSE	FALSE
YDL160C	2.49185	1.77259	1.39232	1.3953	1.89308	1.95693	TRUE	TRUE	TRUE	TRUE	TRUE	TRUE
YDL159W-A	NA	NA	NA	NA	NA	NA	FALSE	FALSE	FALSE	FALSE	FALSE	FALSE
YDL159W	2.05889	1.45943	4.04439	1.73697	1.80735	1.77761	FALSE	FALSE	FALSE	FALSE	FALSE	FALSE
YDL157C	0.736966	1.32193	1.22239	0.459432	1.61667	0.514573	FALSE	FALSE	FALSE	FALSE	FALSE	FALSE
YDL156W	-1.70044	-1.58496	-2.16993	NA	-1.08746	-0.584963	FALSE	FALSE	FALSE	FALSE	FALSE	FALSE
YDL155W	-0.192645	0.584963	0	0	-0.547488	0.485427	FALSE	FALSE	FALSE	FALSE	FALSE	FALSE
YDL154W	NA	1.58496	1.58496	NA	-1.58496	0.584963	FALSE	FALSE	FALSE	FALSE	FALSE	FALSE
YDL153C	1.42884	NA	1.36923	-1	1.45066	0.321928	FALSE	FALSE	FALSE	FALSE	FALSE	FALSE
YDL150W	-0.82103	-1.45943	-1.07039	0	0	-1.70044	TRUE	FALSE	TRUE	FALSE	TRUE	FALSE
YDL149W	0.70044	-0.304855	0.777608	-0.485427	1.77761	-0.415037	FALSE	FALSE	FALSE	FALSE	FALSE	TRUE
YDL148C	1.65711	NA	2.73697	1.58496	2.18763	1.45943	FALSE	FALSE	FALSE	FALSE	FALSE	FALSE
YDL147W	-0.169925	-0.321928	-0.489805	0.0962153	-0.172467	0.0238467	TRUE	TRUE	TRUE	TRUE	TRUE	TRUE
YDL146W	0.584963	NA	-1	0	NA	0	FALSE	FALSE	FALSE	FALSE	FALSE	FALSE
YDL145C	1.76184	0.974005	1.7425	0.206451	1.35548	1.5656	TRUE	TRUE	TRUE	TRUE	TRUE	TRUE
YDL144C	1.76818	0.67319	1.39855	0.923379	1.66985	0.742202	TRUE	TRUE	TRUE	TRUE	TRUE	TRUE
YDL143W	2.8625	2.28293	2.5518	2.9386	2.91839	3.18982	TRUE	FALSE	TRUE	FALSE	TRUE	FALSE
YDL142C	2	0.222392	1.26303	0	1.45943	-0.137504	FALSE	FALSE	FALSE	FALSE	FALSE	FALSE
YDL141W	1.58496	NA	0.584963	-1	-0.514573	-0.736966	FALSE	FALSE	FALSE	FALSE	FALSE	FALSE
YDL140C	0.247928	1.19265	1	0	1.41504	-0.169925	FALSE	FALSE	FALSE	FALSE	FALSE	FALSE
YDL139C	1.34395	-0.847997	0.938599	-0.807355	2.12928	0.788496	FALSE	FALSE	FALSE	FALSE	FALSE	FALSE
YDL138W	2.70895	4.40939	3.09686	4.85798	2.70044	2.52838	FALSE	FALSE	FALSE	FALSE	FALSE	FALSE
YDL137W	2.03747	2.62449	1.69032	2.8365	2.77761	2.55254	FALSE	FALSE	TRUE	FALSE	FALSE	FALSE
YDL136W	-0.244188	-0.441372	0.0701261	-0.463247	0.208186	-0.622815	TRUE	TRUE	TRUE	TRUE	TRUE	TRUE
YDL136W	NA	NA	NA	NA	NA	NA	FALSE	FALSE	FALSE	FALSE	FALSE	FALSE
YDL135C	0.222392	-0.169925	0.514573	-1.58496	0.295456	-0.584963	FALSE	FALSE	FALSE	FALSE	TRUE	FALSE
YDL134C	-0.902703	-0.813587	-0.306661	-0.544321	-0.72792	-0.341037	TRUE	TRUE	TRUE	TRUE	TRUE	TRUE
YDL133C-A	0.972693	0.777608	1.9102	1.70782	1.80498	1.59096	TRUE	TRUE	TRUE	TRUE	TRUE	TRUE
YDL133W	-1.08746	-1.24101	-3	-3.45943	-1.89308	-3.75489	FALSE	FALSE	FALSE	FALSE	FALSE	FALSE
YDL132W	0.621488	0.0931094	1.46949	0.836501	0.768674	0.552541	TRUE	TRUE	FALSE	FALSE	TRUE	TRUE
YDL131W	1.926	1.58496	1.25634	1.70044	1.848	0.884523	FALSE	FALSE	FALSE	FALSE	FALSE	FALSE
YDL130W-A	0.434403	-0.152003	1.17754	1.10535	1.43539	0.143735	TRUE	TRUE	TRUE	TRUE	TRUE	TRUE
YDL130W	0.559427	1.01355	0.725493	0.467779	0.695145	0.74366	TRUE	TRUE	TRUE	TRUE	TRUE	TRUE
YDL130W	NA	NA	NA	NA	NA	NA	FALSE	FALSE	FALSE	FALSE	FALSE	FALSE
YDL129W	0.716207	0.321928	-0.469485	1.58496	0.836501	-0.263034	FALSE	FALSE	FALSE	FALSE	FALSE	FALSE
YDL128W	2.52356	0.63743	2.38466	2.80735	3.08746	1.71621	FALSE	FALSE	FALSE	FALSE	FALSE	FALSE
YDL127W	1.14684	0	1.35364	-0.485427	0.378512	0.736966	FALSE	FALSE	FALSE	FALSE	TRUE	FALSE
YDL126C	2.56294	1.65055	3.01282	2.57154	2.78606	2.4634	TRUE	TRUE	TRUE	FALSE	TRUE	TRUE
YDL125C	-1.35364	-0.642448	-2.30743	-1.40439	-1.51457	-1.70782	FALSE	TRUE	TRUE	FALSE	TRUE	TRUE
YDL125C	NA	NA	NA	NA	NA	NA	FALSE	FALSE	FALSE	FALSE	FALSE	FALSE
YDL124W	-0.453512	0.241008	1.16656	0.816693	1.18235	0.566848	TRUE	TRUE	TRUE	TRUE	TRUE	TRUE
YDL123W	1.67807	0.68966	2.42999	1.52725	1.79256	1.50696	TRUE	TRUE	FALSE	FALSE	TRUE	FALSE
YDL122W	0.0931094	0.736966	0.584963	-0.678072	0.211504	0	FALSE	FALSE	FALSE	FALSE	FALSE	FALSE
YDL121C	2.22239	NA	1.07039	1	2.58496	1.58496	FALSE	FALSE	FALSE	FALSE	FALSE	FALSE
YDL120W	-0.040642	0.662965	0.462343	0.14439	0.376563	-0.415037	TRUE	TRUE	TRUE	FALSE	TRUE	TRUE
YDL119C	3.90689	1.58496	3.45943	2.80735	2.26303	2.80735	FALSE	FALSE	FALSE	FALSE	FALSE	FALSE
YDL118W	NA	NA	NA	NA	NA	NA	FALSE	FALSE	FALSE	FALSE	FALSE	FALSE
YDL117W	-2.32193	-0.917538	-0.830075	-1	-1.76553	-2.70044	FALSE	FALSE	FALSE	FALSE	FALSE	FALSE
YDL116W	3.32193	3.90689	4.85798	2.45943	2.20945	3.54432	FALSE	FALSE	FALSE	FALSE	FALSE	FALSE
YDL115C	0.736966	0.584963	2.52356	1.23704	1.65208	0.765535	TRUE	TRUE	FALSE	FALSE	TRUE	TRUE
YDL115C	NA	NA	NA	NA	NA	NA	FALSE	FALSE	FALSE	FALSE	FALSE	FALSE
YDL114W	NA	NA	NA	NA	NA	NA	FALSE	FALSE	FALSE	FALSE	FALSE	FALSE
YDL113C	-1.45943	-0.917538	-0.49304	0.125531	-0.0356239	-0.86507	FALSE	TRUE	TRUE	TRUE	TRUE	TRUE
YDL112W	-0.536053	0.584963	0	-1.32193	-0.192645	-1.22239	TRUE	FALSE	FALSE	FALSE	TRUE	FALSE
YDL111C	-0.192645	-1.26303	-1.39232	-0.192645	-0.706269	-0.263034	FALSE	FALSE	FALSE	FALSE	FALSE	FALSE
YDL110C	-0.289507	-0.446608	0.0759489	-0.208108	-0.337035	0.0843922	TRUE	TRUE	TRUE	TRUE	TRUE	TRUE
YDL109C	0.192645	0.736966	0.485427	-1.16993	0.514573	0.263034	FALSE	FALSE	FALSE	FALSE	FALSE	FALSE
YDL108W	2.32193	0	1.89308	-0.321928	0.691878	1.22239	FALSE	FALSE	FALSE	FALSE	FALSE	FALSE
YDL108W	NA	NA	NA	NA	NA	NA	FALSE	FALSE	FALSE	FALSE	FALSE	FALSE
YDL107W	3.45943	1.58496	3.58496	3.16993	2.80735	2.32193	FALSE	FALSE	FALSE	FALSE	FALSE	FALSE
YDL106C	1.37346	0.476438	1.79837	-0.125531	1.63743	0.263034	TRUE	TRUE	TRUE	TRUE	TRUE	TRUE
YDL105W	1	2.58496	1.18442	1.80735	1.08746	2.03953	TRUE	FALSE	TRUE	FALSE	TRUE	FALSE
YDL104C	0	NA	1	NA	1	0	FALSE	FALSE	FALSE	FALSE	FALSE	FALSE
YDL103C	1.90689	2.75489	2.78427	3.80735	3.58496	1.54057	FALSE	FALSE	FALSE	FALSE	FALSE	FALSE
YDL102W	0.652077	2	-0.874469	-0.415037	-0.807355	-0.415037	FALSE	FALSE	FALSE	FALSE	FALSE	FALSE
YDL101C	0.584963	-1	2.22239	NA	1.90689	2.16993	FALSE	FALSE	FALSE	FALSE	FALSE	FALSE
YDL100C	2.11548	1.40599	2.15056	2.39855	3.03395	1.86994	FALSE	TRUE	TRUE	FALSE	TRUE	TRUE
YDL099W	-0.952694	-1.63743	-0.169925	-0.765535	0.339486	-0.494765	TRUE	FALSE	TRUE	FALSE	TRUE	TRUE
YDL098C	-0.447459	1.11548	1.152	0.289507	0.678072	0.678072	FALSE	FALSE	FALSE	FALSE	FALSE	FALSE
YDL097C	0.827163	-0.454566	1.5119	0.736966	1.70044	-0.212994	TRUE	TRUE	TRUE	FALSE	TRUE	TRUE
YDL095W	3.45943	4.70044	5.70044	4.16993	4.10852	4.11548	FALSE	FALSE	FALSE	FALSE	FALSE	FALSE
YDL093W	3.05889	3	4	3.45943	2.9542	4.16993	FALSE	FALSE	FALSE	FALSE	FALSE	FALSE
YDL092W	0.931469	1.13191	2.03993	1.53605	1.90105	1.81097	TRUE	TRUE	TRUE	TRUE	TRUE	TRUE
YDL091C	-0.63743	-1.926	-0.70044	0	-0.917538	-1.41504	FALSE	FALSE	FALSE	FALSE	FALSE	FALSE
YDL090C	-0.347923	-0.777608	0.14439	0.777608	-0.176878	-0.0824622	FALSE	FALSE	FALSE	FALSE	TRUE	FALSE
YDL089W	1.45943	0	0	0.736966	2	0.514573	FALSE	FALSE	FALSE	FALSE	FALSE	FALSE
YDL088C	-0.975752	-0.533432	-0.827163	0.321928	-0.801454	-0.378512	TRUE	TRUE	TRUE	TRUE	TRUE	TRUE
YDL087C	1.28011	1.11548	3.54432	1.70044	2.22239	1.80735	FALSE	FALSE	FALSE	FALSE	FALSE	FALSE
YDL086W	-1.22239	NA	-1.32193	NA	0.321928	-1.32193	FALSE	FALSE	FALSE	FALSE	FALSE	FALSE
YDL085C-A	0.838719	0.479993	1.11407	0.109624	1.15754	0.83399	TRUE	TRUE	TRUE	TRUE	TRUE	TRUE
YDL085W	NA	0	1	1	1	0.514573	FALSE	FALSE	FALSE	FALSE	FALSE	FALSE
YDL084W	0.76651	-0.0614005	0.978626	0.423211	1.28011	0.923379	TRUE	TRUE	TRUE	TRUE	TRUE	TRUE
YDL083C	3.46538	3.87447	4.29002	3.21917	3.8413	3.61891	TRUE	FALSE	FALSE	FALSE	TRUE	TRUE
YDL083C	NA	NA	NA	NA	NA	NA	FALSE	FALSE	FALSE	FALSE	FALSE	FALSE
YDL082W	1.66192	1.71621	1.61195	1.58496	2.00908	1.8345	TRUE	TRUE	TRUE	TRUE	TRUE	TRUE
YDL082W	NA	NA	NA	NA	NA	NA	FALSE	FALSE	FALSE	FALSE	FALSE	FALSE
YDL081C	1.48113	1.43172	1	0.331844	1.33082	1.75489	TRUE	TRUE	TRUE	TRUE	TRUE	TRUE
YDL080C	2	-0.584963	0.584963	0	-0.415037	1.41504	FALSE	FALSE	FALSE	FALSE	FALSE	FALSE
YDL079C	-0.736966	2	0.415037	0.874469	0.321928	0.469485	FALSE	FALSE	FALSE	FALSE	FALSE	FALSE
YDL079C	NA	NA	NA	NA	NA	NA	FALSE	FALSE	FALSE	FALSE	FALSE	FALSE
YDL078C	2.45943	2.80735	2.36923	1.67807	1.95936	1.87447	FALSE	FALSE	FALSE	FALSE	FALSE	FALSE
YDL077C	1.58496	-0.415037	1	-0.584963	-0.906891	0.807355	FALSE	FALSE	FALSE	FALSE	FALSE	FALSE
YDL076C	0.615336	1.23133	0.930737	2.20511	0.14439	1.09803	TRUE	TRUE	TRUE	FALSE	TRUE	TRUE
YDL075W	0.0974261	0.70715	0.387526	0.359282	0.264385	0.469997	TRUE	TRUE	TRUE	TRUE	TRUE	TRUE
YDL075W	NA	NA	NA	NA	NA	NA	FALSE	FALSE	FALSE	FALSE	FALSE	FALSE
YDL074C	0.758992	-0.485427	1.51457	3.80735	1.16993	0.514573	FALSE	FALSE	FALSE	FALSE	FALSE	FALSE
YDL073W	-1.48543	0.584963	0.807355	NA	0	-1.16993	FALSE	FALSE	FALSE	FALSE	FALSE	FALSE
YDL072C	1.87447	2.49476	2.5502	1.41504	4.18587	1.85561	FALSE	FALSE	FALSE	FALSE	FALSE	TRUE
YDL070W	1.01191	0.324622	1.7885	1.43134	1.54357	0.563901	TRUE	TRUE	TRUE	TRUE	TRUE	TRUE
YDL069C	1.58496	-2.32193	NA	NA	NA	NA	FALSE	FALSE	FALSE	FALSE	FALSE	FALSE
YDL067C	0.671377	0.30117	1.25507	0.523562	1.41352	1.27103	TRUE	TRUE	TRUE	TRUE	TRUE	TRUE
YDL066W	1.16993	2.1375	2.26202	3.18133	2.26202	2.45519	TRUE	TRUE	TRUE	FALSE	TRUE	TRUE
YDL065C	-1.9386	-3.10434	-1.10893	-1.1375	-1.35954	-1.7137	TRUE	FALSE	TRUE	TRUE	TRUE	TRUE
YDL064W	0.400538	0.807355	0.853611	1.14886	1.76939	1.32193	TRUE	TRUE	TRUE	TRUE	TRUE	TRUE
YDL064W	NA	NA	NA	NA	NA	NA	FALSE	FALSE	FALSE	FALSE	FALSE	FALSE
YDL063C	1	NA	2	NA	1.58496	NA	FALSE	FALSE	FALSE	FALSE	FALSE	FALSE
YDL061C	-4.9542	NA	-4.45943	-3.64386	-5.33985	-5.83289	FALSE	FALSE	FALSE	FALSE	FALSE	FALSE
YDL060W	1.64981	2.45943	3.40599	1.58496	2.75974	3.45943	TRUE	FALSE	FALSE	FALSE	TRUE	FALSE
YDL059C	1	0.678072	0.917538	0.584963	0.530515	1.22239	FALSE	FALSE	FALSE	FALSE	FALSE	FALSE
YDL058W	2.32193	0	2	0.321928	1.58496	NA	FALSE	FALSE	FALSE	FALSE	FALSE	FALSE
YDL057W	1.32193	2.90689	4.58496	4.32193	3.45943	1.89308	FALSE	FALSE	FALSE	FALSE	FALSE	FALSE
YDL056W	1.16993	0.736966	NA	1.58496	1.26303	0.222392	FALSE	FALSE	FALSE	FALSE	FALSE	FALSE
YDL055C	-0.0780025	-0.241008	0.115477	-2	-0.121991	-0.347923	TRUE	FALSE	TRUE	FALSE	TRUE	FALSE
YDL054C	-1.80735	0.263034	1.16993	0.485427	0.874469	0.263034	FALSE	FALSE	FALSE	FALSE	FALSE	FALSE
YDL053C	-1.5025	-1.822	-1.38082	-1.09622	-1.22882	-1.02975	TRUE	TRUE	TRUE	TRUE	TRUE	TRUE
YDL052C	1.83007	2	2.54432	1.71621	2.67243	2.02748	FALSE	FALSE	FALSE	FALSE	FALSE	FALSE
YDL051W	2.79751	3.4021	3.2115	3.08746	3.99469	3.28204	TRUE	FALSE	FALSE	FALSE	FALSE	FALSE
YDL049C	-2.32193	-1.58496	NA	0	NA	-2	FALSE	FALSE	FALSE	FALSE	FALSE	FALSE
YDL048C	0.415037	1.08092	2.08746	2.28951	2.75489	1.61775	TRUE	TRUE	FALSE	FALSE	FALSE	TRUE
YDL047W	-1.66742	-0.973033	-0.936806	-1.29546	-1.32193	-1.11103	FALSE	TRUE	TRUE	TRUE	TRUE	TRUE
YDL046W	1.03747	0.82103	1.80735	1.66742	0.710493	2.63227	FALSE	TRUE	TRUE	FALSE	TRUE	FALSE
YDL045W-A	1.71882	2.34577	3.21632	1.80735	2.9542	2.50986	TRUE	FALSE	FALSE	TRUE	TRUE	TRUE
YDL045C	0.415037	0.736966	1.87447	-0.736966	3.32193	0.321928	FALSE	FALSE	FALSE	FALSE	FALSE	FALSE
YDL044C	0.514573	0.222392	2.58496	NA	2.32193	1.45943	FALSE	FALSE	FALSE	FALSE	FALSE	FALSE
YDL043C	2.85798	0.847997	2.12928	0.736966	3	0.847997	FALSE	FALSE	FALSE	FALSE	FALSE	FALSE
YDL042C	1.20945	1.1375	2.72792	1.41504	2.47393	1.45943	FALSE	FALSE	FALSE	FALSE	FALSE	FALSE
YDL040C	2.47131	3.62449	4.44294	4.20945	3.9386	4.29768	FALSE	FALSE	FALSE	FALSE	FALSE	FALSE
YDL039C	0.628031	0.847997	1.22239	2	0	0.415037	FALSE	FALSE	FALSE	FALSE	FALSE	FALSE
YDL037C	1.73697	1.32193	NA	NA	0	NA	FALSE	FALSE	FALSE	FALSE	FALSE	FALSE
YDL036C	-1.58496	-0.137504	-2.1375	-2.16993	-2.80735	-1.32193	FALSE	FALSE	FALSE	FALSE	FALSE	FALSE
YDL035C	1.09954	2.16993	2.52356	0	2.41504	2.08746	FALSE	FALSE	FALSE	FALSE	FALSE	FALSE
YDL033C	1.73697	-1.80735	1.87447	0.321928	0.584963	1	FALSE	FALSE	FALSE	FALSE	FALSE	FALSE
YDL031W	0	-1.16993	2.09954	NA	0.825971	0.263034	TRUE	FALSE	FALSE	FALSE	TRUE	FALSE
YDL030W	2.76553	2.926	2.58496	NA	1.49476	0.63743	FALSE	FALSE	FALSE	FALSE	FALSE	FALSE
YDL029W	-0.440573	-0.440573	-0.392317	-1.58496	-0.251539	-0.567041	FALSE	FALSE	FALSE	FALSE	TRUE	TRUE
YDL029W	NA	NA	NA	NA	NA	NA	FALSE	FALSE	FALSE	FALSE	FALSE	FALSE
YDL028C	-0.489805	-0.392317	-1.35364	-1.06413	-0.631355	-0.773724	TRUE	FALSE	TRUE	FALSE	TRUE	TRUE
YDL027C	2.80735	2.90689	3.75489	1.9386	2.89308	2.47131	FALSE	FALSE	FALSE	FALSE	FALSE	FALSE
YDL025C	2.08746	2.0163	2.52356	2.75002	1.14202	2.19438	FALSE	TRUE	FALSE	FALSE	TRUE	TRUE
YDL024C	-1.58496	-0.415037	NA	NA	NA	0.321928	FALSE	FALSE	FALSE	FALSE	FALSE	FALSE
YDL022W	-0.514573	-0.978806	-0.545434	-0.987138	-0.275634	-1.03103	TRUE	TRUE	TRUE	TRUE	TRUE	TRUE
YDL021W	2.80735	1.45943	2.58496	1.73697	2	2.9386	FALSE	FALSE	FALSE	FALSE	FALSE	FALSE
YDL020C	-0.654225	-0.609541	-0.232661	-0.724366	-1.078	-0.903038	TRUE	TRUE	TRUE	TRUE	TRUE	TRUE
YDL019C	0.263034	-1	1	0.192645	-2	0.584963	FALSE	FALSE	FALSE	FALSE	FALSE	FALSE
YDL018C	0.777608	-0.321928	0.514573	-0.584963	0	-1	FALSE	FALSE	FALSE	FALSE	FALSE	FALSE
YDL017W	-2.73697	-3.70044	-1.41504	-2.11548	-1.58496	-1	FALSE	FALSE	FALSE	FALSE	FALSE	FALSE
YDL015C	1.48543	0.459432	1.73697	2.52356	1.82597	1.04731	FALSE	FALSE	FALSE	FALSE	FALSE	FALSE
YDL014W	-2.16474	-1.41504	-0.850424	-0.691878	-1.25584	-0.652077	TRUE	FALSE	TRUE	FALSE	TRUE	TRUE
YDL013W	-1.86507	-0.847997	-0.584963	-1.73697	-2.152	-1.70044	FALSE	FALSE	FALSE	FALSE	FALSE	FALSE
YDL012C	0.160936	0.626185	1.34062	0.746714	1.12234	0.607683	TRUE	TRUE	TRUE	TRUE	TRUE	TRUE
YDL012C	NA	NA	NA	NA	NA	NA	FALSE	FALSE	FALSE	FALSE	FALSE	FALSE
YDL010W	1.29546	-1	-0.621488	-1	0.788496	-0.263034	FALSE	FALSE	FALSE	FALSE	FALSE	FALSE
YDL008W	2.80735	0	1.22239	2.32193	NA	1.22239	FALSE	FALSE	FALSE	FALSE	FALSE	FALSE
YDL007C-A	NA	NA	NA	NA	NA	NA	FALSE	FALSE	FALSE	FALSE	FALSE	FALSE
YDL007W	1.05585	1.40881	2.21917	1.56188	2.16046	0.968973	TRUE	TRUE	TRUE	TRUE	TRUE	TRUE
YDL006W	-1.32193	-3.45943	-1.80735	NA	-1.41504	-0.678072	FALSE	FALSE	FALSE	FALSE	FALSE	FALSE
YDL005C	0.440573	0.830075	0.0703893	-0.807355	0.563901	0.184425	FALSE	FALSE	TRUE	FALSE	TRUE	TRUE
YDL004W	2.03953	1.83494	2.68706	1.7137	2.39744	1.98832	TRUE	TRUE	TRUE	TRUE	TRUE	TRUE
YDL003W	-0.836501	-1	-1	NA	-0.341037	-1.32193	FALSE	FALSE	FALSE	FALSE	FALSE	FALSE
YDL002C	0.736966	1.93289	2.77259	1.47393	2.41504	1.44057	FALSE	FALSE	FALSE	FALSE	FALSE	FALSE
YDL001W	-0.106915	1	-2	0.485427	0	0.716207	FALSE	FALSE	FALSE	FALSE	FALSE	FALSE
YDR001C	3.12928	2.49338	2.88042	2.80735	3.16993	2.1486	FALSE	TRUE	TRUE	TRUE	FALSE	TRUE
YDR002W	0.625152	0.610053	1.07325	0.389947	0.966833	1.03395	TRUE	TRUE	TRUE	TRUE	TRUE	TRUE
YDR003W	-0.925999	-0.866733	-1.28951	-0.736966	-0.440573	-0.269187	FALSE	FALSE	FALSE	FALSE	FALSE	TRUE
YDR003W-A	1.94753	1.46949	1.1375	1.41504	1.18442	2.152	FALSE	FALSE	FALSE	FALSE	FALSE	FALSE
YDR004W	NA	NA	NA	NA	NA	NA	FALSE	FALSE	FALSE	FALSE	FALSE	FALSE
YDR005C	-0.234465	0.658963	0.222392	-0.321928	-0.678072	0.514573	FALSE	FALSE	FALSE	FALSE	FALSE	FALSE
YDR005C	NA	NA	NA	NA	NA	NA	FALSE	FALSE	FALSE	FALSE	FALSE	FALSE
YDR006C	1.72247	1.95936	1.39855	2.43296	2.67807	1.87447	FALSE	FALSE	FALSE	FALSE	FALSE	FALSE
YDR007W	1.94753	0.925999	1.75489	2.70044	1.37851	2.70044	FALSE	FALSE	FALSE	FALSE	FALSE	FALSE
YDR009W	0	-1.58496	NA	NA	NA	1.58496	FALSE	FALSE	FALSE	FALSE	FALSE	FALSE
YDR011W	1.34792	1.73697	2.72792	2.58496	2.29123	1.2303	TRUE	FALSE	FALSE	FALSE	FALSE	TRUE
YDR012W	3.47573	3.23266	3.57289	2.54432	3.57491	3.16993	FALSE	FALSE	FALSE	FALSE	FALSE	FALSE
YDR013W	-1	-1.41504	-1	0.736966	-1.152	-1	FALSE	FALSE	FALSE	FALSE	FALSE	FALSE
YDR014W	2.58496	NA	2.32193	NA	1.67807	NA	FALSE	FALSE	FALSE	FALSE	FALSE	FALSE
YDR014W-A	NA	0.415037	NA	NA	-0.415037	NA	FALSE	FALSE	FALSE	FALSE	FALSE	FALSE
YDR016C	1.03953	1.44057	2.05889	1.32193	2.41504	1.32193	FALSE	FALSE	FALSE	FALSE	FALSE	FALSE
YDR017C	-2.1375	-3.90689	-1	-2.58496	-4.90689	-1.58496	FALSE	FALSE	FALSE	FALSE	FALSE	FALSE
YDR018C	NA	-1	NA	NA	0	-1.58496	FALSE	FALSE	FALSE	FALSE	FALSE	FALSE
YDR019C	1.36923	0.917538	2.32193	3	1.16993	2.90689	FALSE	FALSE	FALSE	FALSE	FALSE	FALSE
YDR020C	1.5025	1.58496	0.169925	1.58496	0.652077	1	FALSE	FALSE	FALSE	FALSE	FALSE	FALSE
YDR021W	-0.485427	NA	1	NA	1	0	FALSE	FALSE	FALSE	FALSE	FALSE	FALSE
YDR022C	-1.16993	-0.0489096	0.304855	-0.152003	0.485427	0	FALSE	TRUE	FALSE	FALSE	FALSE	TRUE
YDR023W	1	1.12928	1.7137	1.12553	1.40988	1.24616	TRUE	TRUE	TRUE	TRUE	TRUE	TRUE
YDR025W	0.646639	0.872125	1.13366	1.08746	1.23199	1.21565	TRUE	TRUE	TRUE	TRUE	TRUE	TRUE
YDR025W	NA	NA	NA	NA	NA	NA	FALSE	FALSE	FALSE	FALSE	FALSE	FALSE
YDR026C	2.02975	2.24793	2.58496	0.222392	2.8413	2.45943	FALSE	FALSE	FALSE	FALSE	FALSE	FALSE
YDR027C	0	-1	0.192645	-2	0	-1	FALSE	FALSE	FALSE	FALSE	FALSE	FALSE
YDR028C	-0.140481	-1.07943	0.31366	-0.443607	0.333737	-0.755763	TRUE	TRUE	TRUE	TRUE	TRUE	TRUE
YDR030C	NA	NA	NA	-1	0	NA	FALSE	FALSE	FALSE	FALSE	FALSE	FALSE
YDR031W	-1.1375	-0.612977	0.452512	0	1.5025	0.337035	FALSE	FALSE	FALSE	FALSE	FALSE	FALSE
YDR032C	-0.283793	-1.09311	-1.89812	-1.45066	-0.76184	-0.0951572	TRUE	TRUE	FALSE	FALSE	TRUE	TRUE
YDR033W	0.675378	0.450661	0.308122	0.137504	0.532874	-0.321928	TRUE	TRUE	TRUE	FALSE	TRUE	FALSE
YDR034C	1.078	0.777608	2.52356	-0.263034	-0.106915	-0.906891	FALSE	FALSE	FALSE	FALSE	FALSE	FALSE
YDR034C-A	NA	NA	NA	NA	NA	NA	FALSE	FALSE	FALSE	FALSE	FALSE	FALSE
YDR034W-B	1	0	1.67807	1.41504	2.75489	1.58496	FALSE	FALSE	FALSE	FALSE	FALSE	FALSE
YDR035W	1.89308	1.14684	2	1	1.88349	1.1635	FALSE	FALSE	FALSE	FALSE	TRUE	TRUE
YDR036C	1.926	3.08746	1.75489	1.70044	3	1.39232	FALSE	FALSE	FALSE	FALSE	FALSE	FALSE
YDR037W	-0.274716	-0.184425	0.138828	-0.874469	0.131744	-0.0388192	TRUE	TRUE	TRUE	TRUE	TRUE	TRUE
YDR038C	1.90046	4.52356	1.78427	2.80735	3	0.788496	FALSE	FALSE	FALSE	FALSE	FALSE	FALSE
YDR039C	2.07529	2.80735	1.78427	2.32193	2.75002	0.710493	FALSE	FALSE	FALSE	FALSE	FALSE	FALSE
YDR040C	0.115477	-1.75489	-0.347923	-0.657112	-0.830075	-0.504473	FALSE	TRUE	FALSE	TRUE	FALSE	TRUE
YDR041W	1.78427	0.469485	1.88042	0.530515	1.68118	0.598637	FALSE	FALSE	TRUE	FALSE	TRUE	TRUE
YDR042C	NA	NA	NA	NA	1	NA	FALSE	FALSE	FALSE	FALSE	FALSE	FALSE
YDR043C	-2.48543	-1.94278	-2.51096	-2.09686	-2.34915	-2.32716	TRUE	TRUE	TRUE	TRUE	TRUE	TRUE
YDR044W	0.807355	0	-1.58496	1.58496	1.09954	1.73697	FALSE	FALSE	FALSE	FALSE	FALSE	FALSE
YDR045C	-1	0	-1.80735	0	-1	0.584963	FALSE	FALSE	FALSE	FALSE	FALSE	FALSE
YDR046C	3.29278	4.52356	2.41504	2.32193	4.12928	5.2854	FALSE	FALSE	FALSE	FALSE	FALSE	FALSE
YDR047W	1.16046	1.53051	0.874469	1.58496	1.39855	1.10692	FALSE	FALSE	FALSE	FALSE	FALSE	FALSE
YDR049W	1	0.192645	0.874469	0.169925	3.16993	1.87447	FALSE	FALSE	FALSE	FALSE	FALSE	FALSE
YDR050C	2.19331	2.26053	2.08057	1.49381	2.56663	1.75598	TRUE	TRUE	TRUE	TRUE	TRUE	TRUE
YDR051C	-0.0780025	0.938599	1.41504	1.11548	0.641546	0.917538	FALSE	FALSE	FALSE	FALSE	TRUE	FALSE
YDR052C	-0.263034	1.48543	0.125531	-0.485427	0	0.514573	FALSE	FALSE	FALSE	FALSE	FALSE	FALSE
YDR054C	-1.16993	-0.321928	-0.373458	-1	-0.929611	-0.106915	TRUE	TRUE	TRUE	TRUE	TRUE	TRUE
YDR055W	0.799701	1.54057	2	-0.0740006	1.82597	1.72792	TRUE	TRUE	FALSE	FALSE	TRUE	FALSE
YDR056C	0.736966	0.378512	1.18057	-1	0.469485	0.612977	FALSE	FALSE	FALSE	FALSE	TRUE	FALSE
YDR057W	1.32193	2.32193	2.66297	2.80735	2.58496	2.90689	FALSE	FALSE	FALSE	FALSE	FALSE	FALSE
YDR058C	2.08746	2.05063	NA	5.08746	5.32193	4.75489	FALSE	FALSE	FALSE	FALSE	FALSE	FALSE
YDR059C	-0.547488	-1.37851	-0.215729	-1.23704	-0.106915	-1.14439	FALSE	TRUE	TRUE	FALSE	TRUE	FALSE
YDR059C	NA	NA	NA	NA	NA	NA	FALSE	FALSE	FALSE	FALSE	FALSE	FALSE
YDR060W	0.394279	2.32193	-0.646363	0.584963	0.568284	0	TRUE	FALSE	TRUE	FALSE	TRUE	FALSE
YDR061W	1.80735	1.41504	1.22239	1.32193	0.192645	0.736966	FALSE	FALSE	FALSE	FALSE	FALSE	FALSE
YDR062W	0.736966	0.432959	0.572579	-0.378512	-0.0264722	-0.0331669	TRUE	TRUE	TRUE	TRUE	TRUE	TRUE
YDR063W	0.610053	0.0641303	0.63743	-1.36923	0.807355	0	FALSE	TRUE	FALSE	FALSE	TRUE	TRUE
YDR064W	-0.512919	0.0916305	-0.182478	-0.164119	-0.180572	-0.323025	TRUE	TRUE	TRUE	TRUE	TRUE	TRUE
YDR064W	NA	NA	NA	NA	NA	NA	FALSE	FALSE	FALSE	FALSE	FALSE	FALSE
YDR065W	0.36257	0	1	1	1	1.73697	FALSE	FALSE	FALSE	FALSE	FALSE	FALSE
YDR066C	1.58496	2.32193	1.80735	NA	0.584963	NA	FALSE	FALSE	FALSE	FALSE	FALSE	FALSE
YDR067C	0.612977	-0.736966	1.58496	1.80735	2	-0.180572	FALSE	FALSE	FALSE	FALSE	FALSE	FALSE
YDR068W	1.32193	0	2.47393	-0.222392	1.26303	0.289507	FALSE	FALSE	FALSE	FALSE	TRUE	FALSE
YDR069C	NA	-1	2.32193	1	-1.58496	3	FALSE	FALSE	FALSE	FALSE	FALSE	FALSE
YDR070C	-0.0780025	0.150492	0.612977	0.279154	0.736966	-0.213514	FALSE	TRUE	FALSE	TRUE	FALSE	TRUE
YDR071C	-0.714598	-0.841302	-0.172467	-0.974909	-0.358048	-0.986061	TRUE	TRUE	TRUE	TRUE	TRUE	TRUE
YDR072C	-1.45943	-1.70044	-0.347923	-0.263034	-0.736966	-0.884523	FALSE	FALSE	FALSE	FALSE	FALSE	FALSE
YDR073W	-0.847997	-1.11548	-0.857981	-1.58496	-1.32193	-1.73697	TRUE	FALSE	FALSE	FALSE	FALSE	FALSE
YDR074W	0.341037	0.258585	0.141356	-0.0283818	0.0740006	0.118999	TRUE	TRUE	TRUE	TRUE	TRUE	TRUE
YDR075W	0.485427	-2	0.125531	0.415037	-0.514573	0.321928	FALSE	FALSE	FALSE	FALSE	FALSE	FALSE
YDR076W	-0.485427	NA	0	NA	2.32193	NA	FALSE	FALSE	FALSE	FALSE	FALSE	FALSE
YDR077W	0.436099	0.167687	0.856034	-0.0511648	0.809316	-0.256098	TRUE	TRUE	TRUE	TRUE	TRUE	TRUE
YDR078C	NA	NA	4.80735	NA	NA	NA	FALSE	FALSE	FALSE	FALSE	FALSE	FALSE
YDR079W	-2	-0.584963	1.87447	1.32193	0.807355	-1.22239	FALSE	FALSE	FALSE	FALSE	FALSE	FALSE
YDR079C-A	1.87447	0.584963	2.22239	0	3.11548	1.87447	FALSE	FALSE	FALSE	FALSE	FALSE	FALSE
YDR080W	1.68806	-0.465664	1.39855	0.752072	1.40718	0.683526	FALSE	TRUE	TRUE	FALSE	TRUE	TRUE
YDR081C	2	NA	1	NA	0.736966	1	FALSE	FALSE	FALSE	FALSE	FALSE	FALSE
YDR082W	0.893085	1.22239	0.415037	NA	1.32193	2.80735	FALSE	FALSE	FALSE	FALSE	FALSE	FALSE
YDR083W	2.12553	NA	2.63743	0.321928	3.01495	1.152	FALSE	FALSE	FALSE	FALSE	FALSE	FALSE
YDR084C	-0.263034	0.807355	-0.247928	1.58496	1.25376	1.44057	FALSE	FALSE	FALSE	FALSE	FALSE	FALSE
YDR085C	0	-1.73697	0	0	0.125531	0.0874628	FALSE	FALSE	FALSE	FALSE	FALSE	FALSE
YDR086C	0.752479	0.78182	0.909235	0.750022	1.12801	0.552541	TRUE	TRUE	TRUE	TRUE	TRUE	TRUE
YDR087C	0.547488	-0.36257	1	0.192645	0.669851	-0.289507	FALSE	FALSE	FALSE	FALSE	TRUE	FALSE
YDR088C	1.11548	1.21501	1.8606	1.32193	1.53916	1.74322	TRUE	TRUE	FALSE	FALSE	TRUE	TRUE
YDR089W	1.32193	2	NA	NA	NA	2	FALSE	FALSE	FALSE	FALSE	FALSE	FALSE
YDR090C	0	1.58496	-1	1.32193	-0.415037	0	FALSE	FALSE	FALSE	FALSE	FALSE	FALSE
YDR091C	-0.658963	0	-1.29956	-0.710493	-0.948775	-1	TRUE	FALSE	TRUE	FALSE	TRUE	FALSE
YDR092W	1.34395	0.0614005	1.16227	3.05889	1.37197	1.11548	FALSE	TRUE	TRUE	FALSE	FALSE	FALSE
YDR092W	NA	NA	NA	NA	NA	NA	FALSE	FALSE	FALSE	FALSE	FALSE	FALSE
YDR093W	-0.667425	-0.807355	-1.45943	0	-0.678072	-0.917538	FALSE	FALSE	FALSE	FALSE	FALSE	FALSE
YDR096W	2.90689	-0.469485	1.58496	0.584963	-0.192645	0.0703893	FALSE	FALSE	FALSE	FALSE	FALSE	TRUE
YDR097C	0.106915	0	0.485427	0.263034	0.540568	-1.87447	TRUE	FALSE	TRUE	FALSE	TRUE	FALSE
YDR098C	NA	NA	NA	-4.58496	NA	NA	FALSE	FALSE	FALSE	FALSE	FALSE	FALSE
YDR099W	-0.607683	-0.624491	-1.96963	-1.80735	-0.347923	-0.841302	TRUE	TRUE	FALSE	FALSE	TRUE	TRUE
YDR100W	2	2.32193	2.5025	1.5025	2.12928	0.392317	FALSE	FALSE	FALSE	FALSE	FALSE	FALSE
YDR101C	1.8625	0.584963	1.65535	2.58496	1.97982	0.70044	FALSE	FALSE	TRUE	FALSE	FALSE	FALSE
YDR103W	2.35548	3.56478	4.8679	2.95936	4.52356	2.72935	FALSE	FALSE	FALSE	FALSE	FALSE	FALSE
YDR104C	2.5025	2.22239	2.9386	1.67807	2.87447	4.08746	FALSE	FALSE	FALSE	FALSE	FALSE	FALSE
YDR105C	1	0.584963	1.58496	NA	1	-0.584963	FALSE	FALSE	FALSE	FALSE	FALSE	FALSE
YDR106W	1	-1	NA	0	-1	NA	FALSE	FALSE	FALSE	FALSE	FALSE	FALSE
YDR107C	-1.58496	0	-1.22239	-2.58496	-1.22239	0	FALSE	FALSE	FALSE	FALSE	FALSE	FALSE
YDR108W	-0.584963	0	1.58496	NA	2.58496	0	FALSE	FALSE	FALSE	FALSE	FALSE	FALSE
YDR109C	-0.192645	2	-0.415037	-2	-0.736966	-0.415037	FALSE	FALSE	FALSE	FALSE	FALSE	FALSE
YDR110W	3.29768	2.73697	3.88264	1.80735	2.94996	1.926	FALSE	FALSE	FALSE	FALSE	FALSE	FALSE
YDR111C	-0.263034	0.485427	0.584963	0	0.289507	1.87447	FALSE	FALSE	FALSE	FALSE	FALSE	FALSE
YDR113C	1.05063	0.678072	0.547488	0.584963	1.1375	0.36257	FALSE	FALSE	FALSE	FALSE	FALSE	FALSE
YDR114C	NA	NA	NA	NA	NA	NA	FALSE	FALSE	FALSE	FALSE	FALSE	FALSE
YDR115W	3.23266	5.90689	5.9542	NA	5.75489	NA	FALSE	FALSE	FALSE	FALSE	FALSE	FALSE
YDR116C	1.27563	2.926	1.12553	0.807355	1.82597	1.44478	FALSE	FALSE	TRUE	FALSE	TRUE	FALSE
YDR117C	1.89308	2	1	0.222392	2.08746	1.83007	FALSE	FALSE	FALSE	FALSE	FALSE	FALSE
YDR118W	NA	2	NA	2	NA	NA	FALSE	FALSE	FALSE	FALSE	FALSE	FALSE
YDR119W	-1.1193	-3.18587	-2.16993	-1.75899	-1.09622	-1.95693	TRUE	FALSE	FALSE	FALSE	TRUE	FALSE
YDR119W-A	0	0	-1	0.263034	-0.321928	-1.41504	FALSE	FALSE	FALSE	FALSE	FALSE	FALSE
YDR120C	NA	NA	-2.32193	NA	NA	NA	FALSE	FALSE	FALSE	FALSE	FALSE	FALSE
YDR121W	2.20163	1.58496	1.58496	2.80735	1.63227	0.906891	FALSE	FALSE	FALSE	FALSE	FALSE	FALSE
YDR122W	0.63941	0.701919	0.55141	0.814444	1.152	0.694708	TRUE	TRUE	TRUE	TRUE	TRUE	TRUE
YDR123C	-0.169925	0	-0.169925	-0.192645	-0.176878	-0.485427	TRUE	FALSE	TRUE	FALSE	TRUE	FALSE
YDR124W	2.39232	2.32193	2.58496	NA	1.58496	3.16993	FALSE	FALSE	FALSE	FALSE	FALSE	FALSE
YDR125C	-1.58496	-2.9386	-3.16993	NA	-3.27302	-4.75489	FALSE	FALSE	FALSE	FALSE	FALSE	FALSE
YDR126W	NA	0	NA	NA	1.58496	0	FALSE	FALSE	FALSE	FALSE	FALSE	FALSE
YDR127W	1.80735	2.45943	-0.222392	0.584963	-1.11548	0.321928	FALSE	FALSE	FALSE	FALSE	FALSE	FALSE
YDR128W	0.736966	1.58496	1.25376	0.584963	0.214125	0.736966	FALSE	FALSE	FALSE	FALSE	TRUE	FALSE
YDR129C	-1.1745	-1.29177	-0.917538	-1.3356	-0.792767	-1.18286	TRUE	TRUE	TRUE	TRUE	TRUE	TRUE
YDR129C	NA	NA	NA	NA	NA	NA	FALSE	FALSE	FALSE	FALSE	FALSE	FALSE
YDR130C	1.76553	2.70044	2.75489	2	2.32193	0.925999	FALSE	FALSE	FALSE	FALSE	FALSE	FALSE
YDR131C	NA	1	-1.58496	NA	1	-0.584963	FALSE	FALSE	FALSE	FALSE	FALSE	FALSE
YDR132C	NA	NA	2.58496	NA	2.32193	NA	FALSE	FALSE	FALSE	FALSE	FALSE	FALSE
YDR135C	1.58496	NA	2.41504	NA	3.32193	3.16993	FALSE	FALSE	FALSE	FALSE	FALSE	FALSE
YDR137W	-0.678072	-1.58496	1	NA	0.847997	-0.584963	FALSE	FALSE	FALSE	FALSE	FALSE	FALSE
YDR138W	1.32193	3.16993	1.58496	1.58496	2	1.58496	FALSE	FALSE	FALSE	FALSE	FALSE	FALSE
YDR139C	1.53478	0.358454	2.30433	1.85798	2.22677	1.65821	TRUE	TRUE	TRUE	FALSE	TRUE	TRUE
YDR139C	NA	NA	NA	NA	NA	NA	FALSE	FALSE	FALSE	FALSE	FALSE	FALSE
YDR140W	NA	NA	-1.1375	-1.80735	-3.05889	-1.32193	FALSE	FALSE	FALSE	FALSE	FALSE	FALSE
YDR141C	-0.432959	0.906891	-0.0524674	1.58496	0.0506261	1.32193	TRUE	FALSE	TRUE	FALSE	TRUE	FALSE
YDR142C	-2.58496	-2.58496	0	0	NA	1.58496	FALSE	FALSE	FALSE	FALSE	FALSE	FALSE
YDR143C	-0.807355	0.263034	0.584963	0.415037	0.584963	-1.22239	FALSE	FALSE	FALSE	FALSE	FALSE	FALSE
YDR144C	-0.387023	0	-0.788496	-0.321928	0.14439	-1.41504	FALSE	FALSE	FALSE	FALSE	FALSE	FALSE
YDR145W	-1.22239	-0.874469	-1.22239	-0.514573	-0.146841	-0.823122	FALSE	FALSE	FALSE	FALSE	TRUE	FALSE
YDR146C	0.321928	1	1.22239	NA	1.58496	2.80735	FALSE	FALSE	FALSE	FALSE	FALSE	FALSE
YDR147W	0.70044	1.36257	0.70044	2	4.39232	1.80735	FALSE	FALSE	FALSE	FALSE	FALSE	FALSE
YDR148C	1	0.176878	0.722466	-0.415037	1	-0.0395284	FALSE	TRUE	TRUE	FALSE	FALSE	TRUE
YDR150W	1.82597	1.64386	1.54057	1.1375	3.2854	0.710493	FALSE	FALSE	FALSE	FALSE	FALSE	FALSE
YDR151C	-3.11548	-1.28951	-1.32193	-3.39232	-1.06413	-1.9386	FALSE	FALSE	FALSE	FALSE	FALSE	FALSE
YDR152W	0.752072	0.521953	0.923649	0.782409	0.963474	0.931287	TRUE	TRUE	TRUE	TRUE	TRUE	TRUE
YDR153C	1.25376	1.35364	0.304855	0	0.321928	0.392317	FALSE	FALSE	FALSE	FALSE	FALSE	FALSE
YDR155C	0.877872	0.795767	0.867444	0.69773	1.14466	1.05264	TRUE	TRUE	TRUE	TRUE	TRUE	TRUE
YDR156W	4.40429	4.19878	4.42312	4.43296	5.01191	4.28857	TRUE	TRUE	TRUE	TRUE	TRUE	TRUE
YDR158W	2.32193	0.70044	1.87447	0.847997	1.73697	3	FALSE	FALSE	FALSE	FALSE	FALSE	FALSE
YDR159W	-0.514573	0	-1.87447	NA	-0.415037	-3.70044	FALSE	FALSE	FALSE	FALSE	FALSE	FALSE
YDR160W	0	1.70044	0	2.16993	-0.263034	1.41504	FALSE	FALSE	FALSE	FALSE	FALSE	FALSE
YDR161W	2.35364	3.80735	3.5518	4.04439	3.07682	2.89308	FALSE	FALSE	FALSE	FALSE	FALSE	FALSE
YDR162C	-0.765535	-0.736966	-0.900464	-1.20163	-0.209453	-1.078	TRUE	FALSE	FALSE	FALSE	TRUE	FALSE
YDR163W	2.03242	1.67807	2.25634	0.628031	2.9542	2.85798	FALSE	FALSE	FALSE	FALSE	FALSE	FALSE
YDR164C	1.85798	2.12928	2.73697	2.9386	2.5025	3.70044	FALSE	FALSE	FALSE	FALSE	FALSE	FALSE
YDR165W	3.12338	4.24793	2.5025	4.39232	2.76818	2.58496	FALSE	FALSE	FALSE	FALSE	FALSE	FALSE
YDR166C	NA	1.58496	NA	0	NA	NA	FALSE	FALSE	FALSE	FALSE	FALSE	FALSE
YDR167W	0.447459	0.341037	0.584963	1.32193	1.22781	0.610053	TRUE	FALSE	TRUE	FALSE	TRUE	FALSE
YDR168W	0	-1	0.0995357	0	0.211504	-1.24101	FALSE	FALSE	TRUE	FALSE	FALSE	FALSE
YDR169C	-1.152	-1.16993	-0.304855	-0.847997	-0.777608	0.70044	FALSE	FALSE	FALSE	FALSE	FALSE	FALSE
YDR169C-A	NA	NA	NA	NA	NA	NA	FALSE	FALSE	FALSE	FALSE	FALSE	FALSE
YDR170C	-1.94251	-1.34577	-1.95936	-1.39855	-2.18442	-1.68806	TRUE	TRUE	FALSE	FALSE	TRUE	FALSE
YDR171W	1.07635	-0.0540652	0.834482	0.0539388	0.86645	0.139789	TRUE	TRUE	TRUE	TRUE	TRUE	TRUE
YDR172W	1.47534	1.31194	1.63604	1.48543	1.39079	1.78069	TRUE	TRUE	TRUE	TRUE	TRUE	TRUE
YDR173C	0	0.584963	3	2.80735	NA	0.485427	FALSE	FALSE	FALSE	FALSE	FALSE	FALSE
YDR174W	0.514573	1.11548	1	1.44057	1.37346	0.777608	FALSE	FALSE	TRUE	FALSE	TRUE	FALSE
YDR175C	0.0703893	1.11548	-0.137504	-0.263034	-0.478047	1.39855	TRUE	FALSE	TRUE	FALSE	TRUE	FALSE
YDR176W	2.11548	1.34104	3.09686	2.41504	2.67807	3.07039	FALSE	FALSE	FALSE	FALSE	FALSE	FALSE
YDR177W	1.63227	1.27563	2.08746	1.12553	2.66985	1.27302	TRUE	FALSE	FALSE	FALSE	FALSE	TRUE
YDR178W	0.777608	0.237039	0.625604	-1.11103	0.830075	0.812914	FALSE	TRUE	TRUE	TRUE	TRUE	TRUE
YDR179C	0.584963	NA	3.05889	1.58496	2.39232	2	FALSE	FALSE	FALSE	FALSE	FALSE	FALSE
YDR179W-A	-1.32193	NA	1.80735	1	0.584963	-2	FALSE	FALSE	FALSE	FALSE	FALSE	FALSE
YDR180W	1.22239	-1.58496	2.1375	2	3.75489	3.16993	FALSE	FALSE	FALSE	FALSE	FALSE	FALSE
YDR181C	-0.807355	-1.41504	-0.241008	-0.736966	0.36257	-0.584963	FALSE	FALSE	FALSE	FALSE	FALSE	FALSE
YDR182W	3.75489	4.01792	4.13614	3.36257	5.39232	3.44057	FALSE	FALSE	FALSE	FALSE	FALSE	FALSE
YDR182W-A	NA	NA	1	NA	NA	0	FALSE	FALSE	FALSE	FALSE	FALSE	FALSE
YDR183W	1.24793	3.32193	2.26303	4.08746	NA	0.321928	FALSE	FALSE	FALSE	FALSE	FALSE	FALSE
YDR184C	-0.874469	-1	0	-1	-1.19265	-0.584963	FALSE	FALSE	TRUE	FALSE	FALSE	FALSE
YDR185C	NA	1	-1	2	-1.58496	-0.415037	FALSE	FALSE	FALSE	FALSE	FALSE	FALSE
YDR186C	0.222392	1	2.11548	1.16993	0.347923	-0.378512	FALSE	FALSE	FALSE	FALSE	FALSE	FALSE
YDR188W	2.76818	1.558	2.33442	2.09516	3.10962	2.44057	FALSE	FALSE	TRUE	FALSE	FALSE	FALSE
YDR189W	2.26849	1.95936	3.52356	2.24793	2.6746	3.63227	FALSE	FALSE	FALSE	FALSE	FALSE	FALSE
YDR190C	0.76184	0.584963	1.79518	1.73697	1.42223	0.884523	TRUE	FALSE	FALSE	FALSE	TRUE	FALSE
YDR191W	1.58496	1	2	NA	0.485427	3.45943	FALSE	FALSE	FALSE	FALSE	FALSE	FALSE
YDR192C	0.321928	0.584963	0.584963	-1.58496	-1.32193	0.736966	FALSE	FALSE	FALSE	FALSE	FALSE	FALSE
YDR194C	-1.20945	-0.63743	-1.05889	-0.621488	-0.658963	0.222392	FALSE	FALSE	TRUE	FALSE	TRUE	TRUE
YDR194W-A	NA	NA	NA	NA	NA	NA	FALSE	FALSE	FALSE	FALSE	FALSE	FALSE
YDR195W	3.45943	1	1.90689	1	1.152	2.32193	FALSE	FALSE	FALSE	FALSE	FALSE	FALSE
YDR196C	0.241008	1.20945	1.23447	1.09954	1.49185	0.791413	FALSE	FALSE	FALSE	FALSE	FALSE	TRUE
YDR197W	-3.1964	-3.71882	-2	-3.42321	-1.25634	-3.03953	FALSE	FALSE	FALSE	FALSE	FALSE	FALSE
YDR198C	0.222392	0.415037	1.58496	NA	0.736966	-3.32193	FALSE	FALSE	FALSE	FALSE	FALSE	FALSE
YDR200C	0.111031	-0.0995357	0.192645	0.485427	-0.169925	0	TRUE	TRUE	TRUE	TRUE	TRUE	TRUE
YDR201W	0.584963	0	1.78427	1.58496	0.862496	1.37851	FALSE	FALSE	FALSE	FALSE	FALSE	FALSE
YDR202C	3.53605	2.31034	3.01792	2.53398	3.39559	2.57827	FALSE	TRUE	TRUE	TRUE	TRUE	TRUE
YDR204W	2	1.22239	1.41504	1.1375	2.11548	0.584963	FALSE	FALSE	FALSE	FALSE	FALSE	FALSE
YDR205W	1	-1.58496	0.321928	1.41504	1	-0.378512	FALSE	FALSE	FALSE	FALSE	FALSE	FALSE
YDR206W	-1.45943	-0.584963	-1.58496	-1.58496	1	-0.584963	FALSE	FALSE	FALSE	FALSE	FALSE	FALSE
YDR207C	0.788496	0.884523	0.691878	1.848	1.10692	1.62803	FALSE	FALSE	FALSE	FALSE	FALSE	FALSE
YDR208W	-1.03953	-0.184425	-1.67807	-0.459432	-1.87447	-1.54057	FALSE	TRUE	FALSE	FALSE	FALSE	FALSE
YDR210W	4.80047	4.67807	5.80367	5.53916	5.83605	5.16993	FALSE	FALSE	FALSE	FALSE	FALSE	FALSE
YDR211W	-0.169925	-0.584963	0.514573	1.09954	1.38702	-0.584963	FALSE	FALSE	FALSE	FALSE	FALSE	FALSE
YDR212W	1.09954	0.584963	1.05889	0.807355	2.44478	1.44057	FALSE	FALSE	FALSE	FALSE	FALSE	FALSE
YDR213W	1.36923	1.90689	2.58496	2.45943	1.96347	1.22239	FALSE	FALSE	FALSE	FALSE	FALSE	FALSE
YDR214W	-1	-2.41504	0.206451	-1	-0.765535	-0.540568	FALSE	FALSE	FALSE	FALSE	FALSE	FALSE
YDR216W	0.584963	0.678072	0.36257	0.777608	0.866733	0.452512	FALSE	FALSE	FALSE	FALSE	FALSE	FALSE
YDR217C	0.691878	2	1.5025	1.58496	1.70044	1	FALSE	FALSE	FALSE	FALSE	FALSE	FALSE
YDR218C	NA	NA	NA	NA	NA	NA	FALSE	FALSE	FALSE	FALSE	FALSE	FALSE
YDR219C	-0.485427	-2.926	0.874469	-4.75489	-0.847997	-2.53605	FALSE	FALSE	FALSE	FALSE	FALSE	FALSE
YDR221W	1.22239	1	-0.584963	2.32193	-0.289507	2.32193	FALSE	FALSE	FALSE	FALSE	FALSE	FALSE
YDR222W	0.777608	0.584963	2.58496	0.584963	2.58496	4.08746	FALSE	FALSE	FALSE	FALSE	FALSE	FALSE
YDR223W	0.415037	-1.44057	0.169925	1.16993	1.41504	-1.11548	FALSE	FALSE	FALSE	FALSE	FALSE	FALSE
YDR224C	2.28586	1.58496	2.26534	1.42084	2.69206	1.46815	TRUE	TRUE	TRUE	TRUE	TRUE	TRUE
YDR225W	0.211504	0	0.16665	0.184425	-0.112475	0.0280144	TRUE	TRUE	TRUE	TRUE	TRUE	TRUE
YDR226W	2.3388	2.32193	2.38247	1.69188	1.60204	1.90182	FALSE	FALSE	FALSE	FALSE	TRUE	FALSE
YDR227W	1.1375	0.736966	0.584963	0.125531	-0.552541	1.32193	TRUE	FALSE	FALSE	FALSE	FALSE	FALSE
YDR228C	-0.485427	NA	0.415037	-1	1	1.11548	FALSE	FALSE	FALSE	FALSE	FALSE	FALSE
YDR229W	4.90689	2.83872	2.05445	2.43296	2.93289	2.33787	FALSE	FALSE	FALSE	FALSE	FALSE	FALSE
YDR231C	-1.51457	0	1	-0.199309	0.29956	-0.22741	FALSE	TRUE	TRUE	TRUE	TRUE	TRUE
YDR232W	0.982298	1.3356	1.6477	1.88452	1.52725	1.06228	TRUE	TRUE	TRUE	FALSE	TRUE	TRUE
YDR233C	-1.09954	-1.30485	-0.434937	-1.14684	-0.930737	-1.06817	TRUE	FALSE	TRUE	FALSE	TRUE	TRUE
YDR234W	1.67807	0	1.37851	1	0.321928	NA	FALSE	FALSE	FALSE	FALSE	FALSE	FALSE
YDR235W	-0.415037	0.415037	0.847997	2.58496	1.48543	0.530515	FALSE	FALSE	FALSE	FALSE	FALSE	FALSE
YDR236C	1.28011	1.19265	1.70044	1.48543	1.85798	0.943416	FALSE	FALSE	FALSE	FALSE	FALSE	FALSE
YDR237W	2.11548	1.32193	2.32193	-0.263034	3.58496	2.45943	FALSE	FALSE	FALSE	FALSE	FALSE	FALSE
YDR238C	1.22239	1.76553	1.48543	1.41504	1.85798	0.169925	FALSE	FALSE	FALSE	FALSE	FALSE	FALSE
YDR239C	1	3.80735	2.11548	0.415037	1.45943	1	FALSE	FALSE	FALSE	FALSE	FALSE	FALSE
YDR240C	3	NA	0.652077	1	1.80735	1.22239	FALSE	FALSE	FALSE	FALSE	FALSE	FALSE
YDR242W	-1.33442	-0.784271	-1.37851	-1.41504	-1.39486	-1.79141	TRUE	FALSE	TRUE	FALSE	TRUE	FALSE
YDR243C	1	NA	1.73697	0	0.584963	NA	FALSE	FALSE	FALSE	FALSE	FALSE	FALSE
YDR244W	0.652077	0.669851	1.63227	0.14439	1	0.0931094	TRUE	TRUE	FALSE	FALSE	TRUE	TRUE
YDR245W	-2.48543	-2.70044	-1.43296	NA	-1.62449	-1.77761	FALSE	FALSE	FALSE	FALSE	FALSE	FALSE
YDR246W	-1.54432	-0.341037	-0.710493	-0.540568	-0.688056	-0.643856	FALSE	FALSE	TRUE	FALSE	FALSE	FALSE
YDR246W-A	1.58496	NA	0	0	NA	0.584963	FALSE	FALSE	FALSE	FALSE	FALSE	FALSE
YDR247W	-0.251539	-0.584963	0.428843	0.169925	0.0588937	-0.406625	TRUE	TRUE	TRUE	TRUE	TRUE	TRUE
YDR248C	-0.938599	-0.137504	-0.0995357	-0.736966	0	-0.206451	FALSE	FALSE	FALSE	FALSE	FALSE	FALSE
YDR249C	-1	2.32193	0.415037	NA	-0.415037	1	FALSE	FALSE	FALSE	FALSE	FALSE	FALSE
YDR251W	0.652077	1.24793	1.36257	0.514573	0.847997	0.847997	FALSE	FALSE	FALSE	FALSE	FALSE	FALSE
YDR252W	-1.58496	NA	-1	-1.58496	NA	NA	FALSE	FALSE	FALSE	FALSE	FALSE	FALSE
YDR253C	-0.968291	-0.830075	-1.45066	NA	-1.77052	-0.321928	TRUE	FALSE	FALSE	FALSE	FALSE	FALSE
YDR254W	NA	NA	NA	0	NA	-1	FALSE	FALSE	FALSE	FALSE	FALSE	FALSE
YDR255C	1.32193	2.22781	1.90046	1.55943	2.1375	1.93681	FALSE	FALSE	FALSE	FALSE	FALSE	TRUE
YDR256C	NA	NA	0	NA	NA	NA	FALSE	FALSE	FALSE	FALSE	FALSE	FALSE
YDR257C	0.192645	-0.415037	1.58496	-0.584963	0	2.32193	FALSE	FALSE	FALSE	FALSE	FALSE	FALSE
YDR258C	0.334419	-0.584963	0.819428	0.182864	0.707819	-0.0230836	TRUE	TRUE	TRUE	TRUE	TRUE	TRUE
YDR259C	0.893085	0.662965	-0.152003	0.70044	0.169925	0.341037	FALSE	FALSE	FALSE	FALSE	FALSE	FALSE
YDR260C	1.89308	2.08746	2.61891	0.691878	2.94902	2.71049	FALSE	FALSE	FALSE	FALSE	FALSE	FALSE
YDR261C	0.662965	-1.1375	-0.584963	-1.1375	0.678072	0	FALSE	FALSE	FALSE	FALSE	FALSE	FALSE
YDR262W	-2.51096	-4.05311	-2.66297	-2.62803	-2.40439	-2.94753	FALSE	FALSE	FALSE	FALSE	FALSE	FALSE
YDR263C	0	NA	NA	NA	NA	-2.32193	FALSE	FALSE	FALSE	FALSE	FALSE	FALSE
YDR264C	0.180572	0.321928	0.415037	0.662965	0.76184	0.222392	FALSE	FALSE	FALSE	FALSE	TRUE	FALSE
YDR265W	2.03562	3.07039	1.62449	1.12553	1.41504	1.46949	FALSE	FALSE	FALSE	FALSE	FALSE	FALSE
YDR266C	3.9542	5.61471	4.24793	2.848	3.27302	3.63227	FALSE	FALSE	FALSE	FALSE	FALSE	FALSE
YDR267C	-1.71621	2.32193	-1.58496	-1	-0.137504	-1.16993	FALSE	FALSE	FALSE	FALSE	FALSE	FALSE
YDR268W	0.321928	1.58496	NA	NA	2.58496	2.80735	FALSE	FALSE	FALSE	FALSE	FALSE	FALSE
YDR270W	-1.22239	-0.584963	NA	1	0	-0.584963	FALSE	FALSE	FALSE	FALSE	FALSE	FALSE
YDR272W	0.427421	0.192645	2.13386	0.765535	1.48938	0.736966	TRUE	TRUE	FALSE	TRUE	TRUE	TRUE
YDR273W	1.58496	1.16993	2.63227	1.26303	2.64386	2.70044	FALSE	FALSE	FALSE	FALSE	FALSE	FALSE
YDR275W	-0.758992	0.847997	-0.387023	-0.321928	0.289507	0.387023	FALSE	FALSE	FALSE	FALSE	FALSE	FALSE
YDR276C	0.38529	0	1.13614	0.135883	0.873243	0.457348	TRUE	TRUE	TRUE	TRUE	TRUE	TRUE
YDR277C	0	-2.08746	-1	-1.80735	-0.222392	-2.32193	FALSE	FALSE	FALSE	FALSE	FALSE	FALSE
YDR279W	2.70044	0.415037	2.5025	1.80735	0.893085	2.16993	FALSE	FALSE	FALSE	FALSE	FALSE	FALSE
YDR280W	-0.160465	0.36257	-0.0671142	0.241008	-0.565597	-0.241008	FALSE	FALSE	TRUE	FALSE	TRUE	FALSE
YDR281C	0.758992	0	2.16993	0	NA	NA	FALSE	FALSE	FALSE	FALSE	FALSE	FALSE
YDR282C	-2.32193	NA	-2.32193	-2.70044	-3.11548	-1.45943	FALSE	FALSE	FALSE	FALSE	FALSE	FALSE
YDR283C	-1.44478	-1.1375	-0.841302	-1.58496	-1.13245	-1.37197	FALSE	FALSE	TRUE	FALSE	TRUE	FALSE
YDR284C	2.11548	-0.125531	0.906891	0.459432	1.58496	0.716207	FALSE	FALSE	FALSE	FALSE	FALSE	FALSE
YDR285W	NA	2	1.58496	-1.32193	0	2.80735	FALSE	FALSE	FALSE	FALSE	FALSE	FALSE
YDR286C	NA	-1.80735	-1.41504	-0.415037	-1	-1.41504	FALSE	FALSE	FALSE	FALSE	FALSE	FALSE
YDR287W	0.106915	0.621488	1.152	1.1375	1.49476	0.736966	FALSE	FALSE	FALSE	FALSE	FALSE	FALSE
YDR288W	-0.736966	-0.292782	0.455679	0.825971	1.61298	0.736966	TRUE	TRUE	TRUE	TRUE	FALSE	TRUE
YDR289C	2.80735	-0.169925	3.80735	1	2.73697	2.58496	FALSE	FALSE	FALSE	FALSE	FALSE	FALSE
YDR291W	1.73697	0.584963	2	0.584963	0.807355	2.22239	FALSE	FALSE	FALSE	FALSE	FALSE	FALSE
YDR292C	-0.206451	0.63743	0.247928	-0.514573	0.432959	2.16993	FALSE	FALSE	FALSE	FALSE	TRUE	FALSE
YDR293C	1.14202	0.785261	2.13245	0.830075	0.78136	0.477322	TRUE	TRUE	FALSE	TRUE	TRUE	TRUE
YDR294C	1.35364	1.51457	1.35364	0.847997	2.16993	1.80735	FALSE	FALSE	FALSE	FALSE	FALSE	FALSE
YDR295C	2.34792	3.24793	2.38466	1.77761	2.36565	2.1964	FALSE	FALSE	FALSE	FALSE	FALSE	FALSE
YDR296W	3.25873	3.35755	3.89673	2.38702	4.29462	2.80735	FALSE	FALSE	FALSE	FALSE	FALSE	FALSE
YDR297W	3.62449	2.70044	4.35755	NA	3.61471	NA	FALSE	FALSE	FALSE	FALSE	FALSE	FALSE
YDR298C	2.11548	2.16993	1.5025	2.11548	2.03953	1.41504	FALSE	FALSE	FALSE	FALSE	FALSE	FALSE
YDR299W	2.7866	2.32193	3.03342	NA	2.82375	1.52356	TRUE	FALSE	FALSE	FALSE	TRUE	FALSE
YDR300C	2.73697	3.80735	1.62449	1.66297	2.88264	3.04439	FALSE	FALSE	FALSE	FALSE	FALSE	FALSE
YDR301W	-1.58496	0	-1.11548	-1.22239	-0.628031	-0.289507	FALSE	FALSE	FALSE	FALSE	FALSE	FALSE
YDR302W	3.04439	3.90689	3.16993	3.16993	3.49185	3.08746	FALSE	FALSE	FALSE	FALSE	FALSE	FALSE
YDR303C	0.115477	-0.415037	0.0641303	0	0.943416	0.353637	TRUE	FALSE	TRUE	FALSE	FALSE	FALSE
YDR304C	-0.296393	-1.16993	-0.420576	-0.712718	-0.136204	-0.584963	TRUE	TRUE	TRUE	TRUE	TRUE	TRUE
YDR305C	-3.04439	-0.947533	-2.47393	-1.87447	-3.12928	-2.19265	FALSE	FALSE	FALSE	FALSE	FALSE	FALSE
YDR305C	NA	NA	NA	NA	NA	NA	FALSE	FALSE	FALSE	FALSE	FALSE	FALSE
YDR306C	1.58496	1.15754	1	-0.36257	1.06413	0.387023	FALSE	FALSE	FALSE	FALSE	FALSE	TRUE
YDR307W	2.90689	2.32193	4.70044	1.32193	3.75489	3.90689	FALSE	FALSE	FALSE	FALSE	FALSE	FALSE
YDR308C	2.32193	1.48543	1.74543	4.24793	1.70044	1.53605	FALSE	FALSE	FALSE	FALSE	TRUE	FALSE
YDR309C	0.347923	1.73697	0.719892	-0.736966	0.415037	-0.5025	FALSE	FALSE	FALSE	FALSE	TRUE	FALSE
YDR310C	-1.53605	-2.32193	-0.152003	-2.32193	-1.66297	-1.11548	FALSE	FALSE	FALSE	FALSE	FALSE	FALSE
YDR311W	2.20163	2.80735	1.45943	2	1.39232	2.20163	FALSE	FALSE	FALSE	FALSE	FALSE	FALSE
YDR312W	3.14684	2	3.8413	NA	2.76939	0.70044	FALSE	FALSE	FALSE	FALSE	FALSE	FALSE
YDR313C	-0.823122	-1.66985	-1.48543	-0.765535	-0.415037	-1.2854	FALSE	FALSE	FALSE	FALSE	FALSE	FALSE
YDR314C	-1.32193	0	-0.584963	1.73697	0.584963	0.584963	FALSE	FALSE	FALSE	FALSE	FALSE	FALSE
YDR315C	NA	0.584963	1	-1	-1	-0.415037	FALSE	FALSE	FALSE	FALSE	FALSE	FALSE
YDR316W	2.60486	2.5502	3.25634	3.49185	3.18133	2.40599	FALSE	FALSE	FALSE	FALSE	FALSE	FALSE
YDR317W	NA	1	2.80735	NA	0.415037	0	FALSE	FALSE	FALSE	FALSE	FALSE	FALSE
YDR318W	-1.77761	-0.206451	-0.283793	0.736966	0.584963	-1.24101	FALSE	FALSE	TRUE	FALSE	FALSE	FALSE
YDR318W	NA	NA	NA	NA	NA	NA	FALSE	FALSE	FALSE	FALSE	FALSE	FALSE
YDR319C	1	0.459432	3.80735	0	3.16993	1.926	FALSE	FALSE	FALSE	FALSE	FALSE	FALSE
YDR320C	-0.0780025	-0.29956	1.32193	0.180572	0.691878	1.30256	FALSE	FALSE	FALSE	FALSE	TRUE	FALSE
YDR320C-A	3.49185	4.83289	NA	3.27302	4.31288	2.34577	FALSE	FALSE	FALSE	FALSE	FALSE	FALSE
YDR321W	2.87447	1.22239	3.926	2.43296	1.92961	2.47805	FALSE	FALSE	FALSE	FALSE	TRUE	FALSE
YDR322W	2	2.80735	2.54432	-0.485427	2.28011	1.22239	FALSE	FALSE	FALSE	FALSE	FALSE	FALSE
YDR322C-A	2.85798	1.79008	2.76553	2.04439	2.75489	1.52725	FALSE	TRUE	TRUE	FALSE	TRUE	TRUE
YDR323C	0.36257	-0.847997	0.736966	1	0.584963	0.263034	FALSE	FALSE	FALSE	FALSE	FALSE	FALSE
YDR324C	NA	NA	NA	NA	NA	-2.32193	FALSE	FALSE	FALSE	FALSE	FALSE	FALSE
YDR325W	-0.584963	0.584963	3.16993	2.32193	0.736966	1	FALSE	FALSE	FALSE	FALSE	FALSE	FALSE
YDR326C	-1.04731	-0.847997	-1.05247	-0.807355	-1	-0.438121	TRUE	TRUE	TRUE	FALSE	TRUE	TRUE
YDR328C	-0.215729	-0.500429	0.298081	-0.330149	-0.273761	0.0210616	TRUE	TRUE	TRUE	TRUE	TRUE	TRUE
YDR329C	2.32193	1.16993	3	0	2	0	FALSE	FALSE	FALSE	FALSE	FALSE	FALSE
YDR330W	2.39232	0.0641303	1.65208	0	1.89308	0.954196	FALSE	TRUE	FALSE	FALSE	FALSE	FALSE
YDR331W	2.58496	2.70044	3.80735	2.16993	3.45943	3.24793	FALSE	FALSE	FALSE	FALSE	FALSE	FALSE
YDR332W	3.80735	2.11548	2.58496	3.58496	1.848	2.90689	FALSE	FALSE	FALSE	FALSE	FALSE	FALSE
YDR333C	0.36257	-0.678072	1.078	1.41504	1.078	0.263034	FALSE	FALSE	FALSE	FALSE	FALSE	FALSE
YDR334W	-1.39232	-0.222392	-1.32193	-1.1375	-1.67807	-0.862496	FALSE	FALSE	FALSE	FALSE	FALSE	FALSE
YDR335W	1.34792	0.900464	2.1375	1.28011	1	1.87447	FALSE	FALSE	FALSE	FALSE	FALSE	FALSE
YDR336W	NA	NA	2.32193	NA	NA	2.32193	FALSE	FALSE	FALSE	FALSE	FALSE	FALSE
YDR337W	2	1.65208	1.62449	1.16993	1.24393	1.45066	FALSE	FALSE	FALSE	FALSE	FALSE	FALSE
YDR338C	-1.32193	-0.874469	-0.263034	-0.415037	0.736966	-1.16993	FALSE	FALSE	FALSE	FALSE	FALSE	FALSE
YDR339C	0.426265	-1.48543	0.16665	0.131245	0.278301	-0.459432	TRUE	FALSE	TRUE	TRUE	TRUE	TRUE
YDR341C	0.830075	0.893085	0.0995357	-0.125531	2.07039	0.5025	FALSE	FALSE	FALSE	FALSE	FALSE	FALSE
YDR342C	NA	2.22239	2.67807	3.1964	2.48543	2.86942	FALSE	FALSE	FALSE	FALSE	FALSE	FALSE
YDR343C	1.58496	2.80735	1.78427	3	2.76553	2.77529	FALSE	FALSE	FALSE	FALSE	FALSE	FALSE
YDR345C	1.23947	1.22239	3.18133	3.32193	2.19967	1.63743	TRUE	FALSE	FALSE	FALSE	TRUE	FALSE
YDR346C	-1.05445	0.192645	-0.337035	-1	-0.552541	-1.70044	FALSE	FALSE	FALSE	FALSE	FALSE	FALSE
YDR347W	2.07039	0.847997	1.68806	3.45943	0	0.584963	FALSE	FALSE	FALSE	FALSE	FALSE	FALSE
YDR348C	0.0671142	0.523562	1.21299	0.263034	0.182864	1.39232	TRUE	FALSE	TRUE	FALSE	TRUE	FALSE
YDR349C	-2.09954	-2.32193	-2.11548	-1.73697	-2.05063	-1.66297	FALSE	FALSE	FALSE	FALSE	FALSE	FALSE
YDR350C	2.80735	0.847997	NA	NA	3.45943	3.16993	FALSE	FALSE	FALSE	FALSE	FALSE	FALSE
YDR351W	-0.605721	0.222392	0.180572	-1.58496	0.552541	-0.321928	TRUE	FALSE	FALSE	FALSE	FALSE	FALSE
YDR352W	2.16993	-0.485427	-1	-2	1.58496	0.415037	FALSE	FALSE	FALSE	FALSE	FALSE	FALSE
YDR353W	1.89162	2.14296	2.79008	2.63005	2.29999	2.62975	TRUE	TRUE	TRUE	TRUE	TRUE	TRUE
YDR354W	1.19265	0.321928	2.5025	0	2	0.152003	FALSE	FALSE	FALSE	FALSE	FALSE	FALSE
YDR356W	2.1375	2.9386	2	1.1375	2.2303	1.71621	FALSE	FALSE	FALSE	FALSE	FALSE	FALSE
YDR357C	-0.514573	-0.263034	0	-1	0.289507	-0.415037	FALSE	FALSE	FALSE	FALSE	FALSE	FALSE
YDR358W	1.63743	0.060121	1.6477	0.782409	2.52838	0.847997	FALSE	TRUE	FALSE	TRUE	FALSE	TRUE
YDR359C	-0.736966	0.378512	1	0	0.0824622	-1.5025	FALSE	FALSE	FALSE	FALSE	FALSE	FALSE
YDR361C	-0.163499	-0.304855	0.31034	-0.192645	0.241008	0.0374747	TRUE	FALSE	TRUE	FALSE	TRUE	TRUE
YDR362C	0.584963	0.807355	0	0	-0.415037	0.584963	FALSE	FALSE	FALSE	FALSE	FALSE	FALSE
YDR363W	-1.28011	-0.459432	-1.51457	-1.41504	-1.22239	-1.80735	FALSE	FALSE	FALSE	FALSE	FALSE	FALSE
YDR363W-A	-1.57706	-1.19265	-1.11042	-1.26589	-1.56359	-1.01408	TRUE	TRUE	TRUE	TRUE	TRUE	TRUE
YDR364C	-0.137504	-0.415037	0.152003	NA	1.19265	2.32193	FALSE	FALSE	FALSE	FALSE	FALSE	FALSE
YDR365C	0.255257	1.26303	0.565597	-0.169925	0.559427	0.643856	TRUE	FALSE	TRUE	FALSE	TRUE	FALSE
YDR366C	NA	0	NA	NA	NA	NA	FALSE	FALSE	FALSE	FALSE	FALSE	FALSE
YDR367W	NA	NA	1.58496	1	2.58496	2.58496	FALSE	FALSE	FALSE	FALSE	FALSE	FALSE
YDR367W	NA	NA	NA	NA	NA	NA	FALSE	FALSE	FALSE	FALSE	FALSE	FALSE
YDR368W	2.9386	1.07039	2.926	1.41504	1.58496	2.80735	FALSE	FALSE	FALSE	FALSE	FALSE	FALSE
YDR369C	1.58496	1	1.80735	NA	2.80735	2.70044	FALSE	FALSE	FALSE	FALSE	FALSE	FALSE
YDR370C	NA	NA	-2.16993	NA	-2.32193	-1.58496	FALSE	FALSE	FALSE	FALSE	FALSE	FALSE
YDR371W	0	0.415037	0.415037	1	3	-1.32193	FALSE	FALSE	FALSE	FALSE	FALSE	FALSE
YDR372C	0.459432	1.1375	1.40599	2.73697	1.62449	1.36257	TRUE	FALSE	TRUE	FALSE	TRUE	FALSE
YDR373W	0	0	0.137504	-0.36257	0.192645	-0.415037	FALSE	FALSE	FALSE	FALSE	FALSE	FALSE
YDR374C	NA	NA	NA	NA	NA	NA	FALSE	FALSE	FALSE	FALSE	FALSE	FALSE
YDR374W-A	-1.58496	-2.05889	-0.678072	-2.80735	0.152003	-0.115477	FALSE	FALSE	FALSE	FALSE	FALSE	FALSE
YDR375C	1.58496	2.32193	2.66297	-2.58496	1.22239	1.22239	FALSE	FALSE	FALSE	FALSE	FALSE	FALSE
YDR376W	0.736966	-2	0.415037	0	0	1	FALSE	FALSE	FALSE	FALSE	FALSE	FALSE
YDR377W	2.04731	2.1822	1.7997	1.36257	2.33703	1.51706	FALSE	FALSE	TRUE	TRUE	FALSE	TRUE
YDR378C	1.53605	1.25376	1.70782	1.48543	1.76005	1.23266	TRUE	FALSE	TRUE	FALSE	TRUE	TRUE
YDR379W	-0.736966	0.415037	-0.584963	-2	0	-0.736966	FALSE	FALSE	FALSE	FALSE	FALSE	FALSE
YDR379C-A	1.5025	1.62015	1.44746	1.88452	2.03747	1.28951	FALSE	TRUE	TRUE	FALSE	FALSE	TRUE
YDR380W	0.584963	0.447459	2.11548	0.807355	2.22239	1.45943	FALSE	FALSE	FALSE	FALSE	FALSE	FALSE
YDR381W	-2.74108	-3.44057	-2.83094	-2.80735	-2.55639	-2.68966	TRUE	TRUE	TRUE	FALSE	TRUE	TRUE
YDR381W	NA	NA	NA	NA	NA	NA	FALSE	FALSE	FALSE	FALSE	FALSE	FALSE
YDR381C-A	-2.96347	-3.08746	-4.52356	-4.64386	NA	-5.12928	FALSE	FALSE	FALSE	FALSE	FALSE	FALSE
YDR381C-A	NA	NA	NA	NA	NA	NA	FALSE	FALSE	FALSE	FALSE	FALSE	FALSE
YDR382W	0.562595	-0.0465426	0.779401	0.329308	0.434096	0.636188	TRUE	TRUE	TRUE	TRUE	TRUE	TRUE
YDR383C	0.5025	1.58496	2.16993	2	1.36257	0.36257	FALSE	FALSE	FALSE	FALSE	FALSE	FALSE
YDR384C	0.862496	0	0.5025	-1	0.332575	-1.51457	FALSE	FALSE	TRUE	FALSE	TRUE	FALSE
YDR385W	1.70695	1.46467	1.63743	1.52356	2.31159	2.32193	TRUE	TRUE	TRUE	FALSE	TRUE	TRUE
YDR386W	-0.152003	-2.16993	0.321928	1.58496	0.280108	0.906891	FALSE	FALSE	FALSE	FALSE	FALSE	FALSE
YDR387C	2.80735	1.80735	3.32193	3.16993	3.32193	1	FALSE	FALSE	FALSE	FALSE	FALSE	FALSE
YDR388W	1.14543	1.27392	1.42999	1.3278	1.76664	1.14568	TRUE	TRUE	TRUE	TRUE	TRUE	TRUE
YDR389W	-0.294447	0	-0.252766	0.459432	0.0554951	-0.257158	TRUE	TRUE	TRUE	FALSE	TRUE	TRUE
YDR390C	3.03562	3.52356	2.43296	4.45943	3.16993	2.22239	FALSE	FALSE	FALSE	FALSE	FALSE	FALSE
YDR391C	-0.0374747	-0.584963	0.454566	0.337035	0.921997	-0.154723	TRUE	TRUE	TRUE	FALSE	TRUE	TRUE
YDR392W	2.86507	2	3.11548	3.11548	3.86507	2.51096	FALSE	FALSE	FALSE	FALSE	FALSE	FALSE
YDR393W	2.9386	3.22239	2.70044	2.9386	3.29278	2.62449	FALSE	FALSE	FALSE	FALSE	FALSE	FALSE
YDR394W	1.98185	1.95842	1.29866	1.45943	1.55552	1.75174	TRUE	TRUE	TRUE	TRUE	TRUE	TRUE
YDR395W	0.415037	0	0	2.58496	0.514573	-0.321928	FALSE	FALSE	FALSE	FALSE	FALSE	FALSE
YDR397C	0.765535	-0.347923	0.969626	0.652077	1.12338	-1.39232	TRUE	FALSE	TRUE	FALSE	TRUE	FALSE
YDR397C	NA	NA	NA	NA	NA	NA	FALSE	FALSE	FALSE	FALSE	FALSE	FALSE
YDR398W	0.263034	NA	0.222392	-1.58496	1.1375	0.415037	FALSE	FALSE	FALSE	FALSE	FALSE	FALSE
YDR399W	-0.0631938	-0.206451	0.736966	0	0.259087	-0.584963	TRUE	FALSE	TRUE	FALSE	TRUE	FALSE
YDR400W	2.07039	2.45943	1.8365	3	2.70044	4.45943	FALSE	FALSE	FALSE	FALSE	FALSE	FALSE
YDR402C	NA	NA	NA	NA	NA	NA	FALSE	FALSE	FALSE	FALSE	FALSE	FALSE
YDR403W	NA	NA	NA	NA	NA	NA	FALSE	FALSE	FALSE	FALSE	FALSE	FALSE
YDR404C	-1.974	-0.893085	-1.77052	-2.48543	-1.10236	-0.874469	FALSE	FALSE	FALSE	FALSE	TRUE	TRUE
YDR405W	-0.793549	-0.415037	-0.347923	-0.657112	0.0978473	-0.921997	TRUE	TRUE	TRUE	TRUE	TRUE	TRUE
YDR406W	2.58496	3.8413	NA	3.5025	NA	2.80735	FALSE	FALSE	FALSE	FALSE	FALSE	FALSE
YDR407C	0.736966	-0.263034	-0.584963	-0.736966	-0.289507	0.321928	FALSE	FALSE	FALSE	FALSE	FALSE	FALSE
YDR408C	0.321928	0.232173	1.17306	0.542527	0.845277	0.514573	TRUE	TRUE	TRUE	TRUE	TRUE	TRUE
YDR409W	-1	-2	-2.80735	-0.321928	-1	0.415037	FALSE	FALSE	FALSE	FALSE	FALSE	FALSE
YDR410C	-0.847997	-0.917538	-1.06413	-0.415037	-0.180572	-0.459432	FALSE	FALSE	FALSE	FALSE	FALSE	FALSE
YDR411C	2.48543	3.70044	4.32193	2.27302	3.51457	1.926	FALSE	FALSE	FALSE	FALSE	FALSE	FALSE
YDR412W	1.14886	-0.807355	0.5025	0	1.42884	0.584963	TRUE	FALSE	TRUE	FALSE	TRUE	FALSE
YDR414C	0.736966	NA	3.32193	1.41504	-0.415037	1	FALSE	FALSE	FALSE	FALSE	FALSE	FALSE
YDR415C	-0.485427	0.807355	-0.137504	-1	-0.777608	-1.16993	FALSE	FALSE	FALSE	FALSE	FALSE	FALSE
YDR416W	-1.32193	-1.58496	-1	-1.58496	-1.58496	-0.584963	FALSE	FALSE	FALSE	FALSE	FALSE	FALSE
YDR418W	0.41165	1.1067	0.894997	1.81315	0.738724	1.16542	TRUE	TRUE	TRUE	TRUE	TRUE	TRUE
YDR419W	2	2.41504	2.5025	NA	1.22239	2.32193	FALSE	FALSE	FALSE	FALSE	FALSE	FALSE
YDR420W	-0.452512	0.584963	-0.469485	-0.584963	-0.125531	0.125531	FALSE	FALSE	FALSE	FALSE	FALSE	FALSE
YDR421W	0.584963	1.09954	0.874469	1.58496	2.22239	1.11548	FALSE	FALSE	FALSE	FALSE	FALSE	FALSE
YDR422C	2.32193	0.63743	1.9542	1.16993	1.53051	1.11548	FALSE	FALSE	FALSE	FALSE	FALSE	FALSE
YDR423C	-4.36923	-4.39232	-5	-5.49185	-5.24793	-5.30378	FALSE	FALSE	FALSE	FALSE	FALSE	FALSE
YDR424C	1.65711	2.64386	2.10692	1.078	3.12338	2.558	FALSE	FALSE	FALSE	FALSE	FALSE	FALSE
YDR424C	NA	NA	NA	NA	NA	NA	FALSE	FALSE	FALSE	FALSE	FALSE	FALSE
YDR424C	NA	NA	NA	NA	NA	NA	FALSE	FALSE	FALSE	FALSE	FALSE	FALSE
YDR425W	0.485427	-1.15754	0.547488	-1.08746	-0.234465	-0.678072	FALSE	FALSE	FALSE	FALSE	FALSE	TRUE
YDR427W	2.66297	0.736966	2.48543	3.70044	3.70044	2.41504	FALSE	FALSE	FALSE	FALSE	FALSE	FALSE
YDR428C	-0.584963	NA	1.80735	NA	1.48543	NA	FALSE	FALSE	FALSE	FALSE	FALSE	FALSE
YDR429C	-0.0874628	-0.565597	0.0515303	0.16711	-0.0750507	-0.732896	TRUE	TRUE	TRUE	TRUE	TRUE	TRUE
YDR430C	-1.51457	-0.736966	0	-0.893085	-0.115477	-0.400538	FALSE	FALSE	FALSE	FALSE	TRUE	TRUE
YDR432W	-0.241818	-0.215729	-0.0568623	0.14439	0.206052	0.128986	TRUE	TRUE	TRUE	TRUE	TRUE	TRUE
YDR434W	0	0	0	-0.584963	0	0	FALSE	FALSE	FALSE	FALSE	FALSE	FALSE
YDR435C	0.584963	0.584963	0.678072	2	1.32193	0.736966	FALSE	FALSE	FALSE	FALSE	FALSE	FALSE
YDR436W	-1	0.0671142	-0.754888	-1.32193	-0.968291	-0.893085	FALSE	TRUE	FALSE	FALSE	TRUE	TRUE
YDR437W	0.584963	1.58496	-0.584963	NA	-2.32193	-0.584963	FALSE	FALSE	FALSE	FALSE	FALSE	FALSE
YDR438W	-1	-3.58496	0	0.847997	-0.678072	1	FALSE	FALSE	FALSE	FALSE	FALSE	FALSE
YDR439W	-0.736966	NA	-0.485427	0.415037	-1.22239	-0.584963	FALSE	FALSE	FALSE	FALSE	FALSE	FALSE
YDR440W	1.5025	1.45943	1.90689	1.58496	1.39855	0	FALSE	FALSE	FALSE	FALSE	FALSE	FALSE
YDR441C	-1.32193	-1	0.807355	NA	0	-1.58496	FALSE	FALSE	FALSE	FALSE	FALSE	FALSE
YDR443C	1.66297	3.36923	1.08746	1.28011	1.05445	1.80735	FALSE	FALSE	FALSE	FALSE	FALSE	FALSE
YDR444W	-1.77259	-1.70044	-3.32193	-1.80735	-0.70044	-1.73697	FALSE	FALSE	FALSE	FALSE	FALSE	FALSE
YDR446W	NA	NA	NA	NA	NA	NA	FALSE	FALSE	FALSE	FALSE	FALSE	FALSE
YDR447C	3.41504	3.45943	3.05585	3.90689	3.71425	2.926	FALSE	FALSE	FALSE	FALSE	FALSE	FALSE
YDR447C	NA	NA	NA	NA	NA	NA	FALSE	FALSE	FALSE	FALSE	FALSE	FALSE
YDR448W	1.18057	0.710493	1.04182	0.378512	0.49304	1.08746	FALSE	FALSE	FALSE	FALSE	TRUE	FALSE
YDR449C	0.273018	NA	-0.304855	0.584963	1.24101	2	TRUE	FALSE	FALSE	FALSE	FALSE	FALSE
YDR450W	2.02145	2.09516	2.25539	2.32971	2.60826	2.19265	TRUE	TRUE	TRUE	TRUE	TRUE	TRUE
YDR450W	NA	NA	NA	NA	NA	NA	FALSE	FALSE	FALSE	FALSE	FALSE	FALSE
YDR451C	0.440573	2.80735	2.848	0.847997	1.71621	1.80735	FALSE	FALSE	FALSE	FALSE	FALSE	FALSE
YDR452W	0.241008	0.556393	-0.120294	0.621488	-0.713696	1.09115	TRUE	TRUE	TRUE	FALSE	TRUE	TRUE
YDR453C	1.80735	2.66297	2.80735	1.09954	2	2.1375	FALSE	FALSE	FALSE	FALSE	FALSE	FALSE
YDR454C	-0.584963	-0.584963	-0.289507	0.847997	0.415037	-3.70044	FALSE	FALSE	FALSE	FALSE	FALSE	FALSE
YDR456W	0.415037	0	-0.584963	0.222392	-0.736966	0.736966	FALSE	FALSE	FALSE	FALSE	FALSE	FALSE
YDR457W	0.874469	1.58496	0.514573	0	0.70044	-0.514573	FALSE	FALSE	FALSE	FALSE	FALSE	FALSE
YDR458C	2.28951	1	2.26849	2.64386	2.46949	0.925999	FALSE	FALSE	FALSE	FALSE	FALSE	TRUE
YDR459C	-2.70044	-1.41504	-1.41504	NA	-0.584963	-1.58496	FALSE	FALSE	FALSE	FALSE	FALSE	FALSE
YDR460W	-1.1375	0	0.807355	-0.36257	0.263034	-1	FALSE	FALSE	FALSE	FALSE	FALSE	FALSE
YDR461W	1.49668	0.797507	2.61586	1.48875	2.21137	1.26651	TRUE	TRUE	TRUE	TRUE	TRUE	TRUE
YDR461C-A	3.58496	1.81359	4.61891	2.9542	4.2384	2.34314	FALSE	TRUE	FALSE	FALSE	FALSE	TRUE
YDR462W	1.31316	1.08746	1.72662	1.22882	1.60572	1.52356	TRUE	TRUE	TRUE	TRUE	TRUE	TRUE
YDR463W	0.767827	-0.251539	1.28951	0.476438	1.06871	0.5025	TRUE	TRUE	TRUE	TRUE	TRUE	TRUE
YDR464W	-0.584963	-0.289507	-0.387023	-1.37851	-0.400538	0.169925	FALSE	FALSE	FALSE	FALSE	TRUE	FALSE
YDR465C	0.830075	0.584963	1.58496	1.80735	2.03562	2.11548	FALSE	FALSE	FALSE	FALSE	FALSE	FALSE
YDR466W	1	1.58496	0	-0.415037	0.736966	0.807355	FALSE	FALSE	FALSE	FALSE	FALSE	FALSE
YDR468C	-0.137504	0	0.347923	0.222392	0	2	FALSE	FALSE	FALSE	FALSE	FALSE	FALSE
YDR469W	1.926	0	0.70044	2.32193	1.68806	0.415037	FALSE	FALSE	FALSE	FALSE	FALSE	FALSE
YDR470C	1.16993	0.584963	1.22239	-0.485427	1.80735	2.32193	FALSE	FALSE	FALSE	FALSE	FALSE	FALSE
YDR471W	0.3614	0.0857299	0.692375	0	0.901352	0.187086	TRUE	TRUE	TRUE	TRUE	TRUE	TRUE
YDR471W	NA	NA	NA	NA	NA	NA	FALSE	FALSE	FALSE	FALSE	FALSE	FALSE
YDR472W	2.5025	0.678072	2.5025	0.222392	1.80735	2.58496	FALSE	FALSE	FALSE	FALSE	FALSE	FALSE
YDR473C	0.222392	-0.847997	1.32193	NA	2.22239	-0.192645	FALSE	FALSE	FALSE	FALSE	FALSE	FALSE
YDR475C	0.146841	0.206451	0.5025	0.584963	1.03562	0.63743	TRUE	TRUE	TRUE	FALSE	TRUE	FALSE
YDR476C	1	1.11548	1.1375	2.90689	2.70044	2.32193	FALSE	FALSE	FALSE	FALSE	FALSE	FALSE
YDR477W	-0.241008	0.415037	0	1.09311	1.29278	1.27563	TRUE	TRUE	TRUE	FALSE	TRUE	FALSE
YDR478W	0.0824622	-0.584963	0.514573	0	0.965235	2	FALSE	FALSE	FALSE	FALSE	TRUE	FALSE
YDR479C	0	-2	0.347923	-0.807355	0.415037	0.921997	FALSE	FALSE	FALSE	FALSE	FALSE	FALSE
YDR480W	0.584963	0.847997	2.24793	0.321928	1.848	0.192645	FALSE	FALSE	FALSE	FALSE	FALSE	FALSE
YDR481C	2.48543	1.76553	5.49185	1.26303	4.42626	1.05445	FALSE	FALSE	FALSE	FALSE	FALSE	FALSE
YDR482C	1.1635	0.347923	1.66297	0.807355	1.4458	0.36257	TRUE	TRUE	FALSE	FALSE	TRUE	TRUE
YDR483W	2.26096	1.4021	3.02857	2.26679	3.25634	1.54157	TRUE	TRUE	TRUE	FALSE	TRUE	TRUE
YDR484W	0.241008	-0.866733	1.45943	-0.247928	1.43296	0.509014	FALSE	FALSE	FALSE	FALSE	FALSE	TRUE
YDR485C	-0.547488	0.321928	0.691878	1.70044	0.0506261	0.932886	TRUE	FALSE	TRUE	FALSE	TRUE	FALSE
YDR486C	0.247928	0.736966	0.652077	1.24101	0.541894	0.752072	TRUE	TRUE	TRUE	FALSE	TRUE	TRUE
YDR487C	1.19265	2.5025	1.21299	1.848	1.08746	0.621488	TRUE	FALSE	TRUE	FALSE	TRUE	TRUE
YDR488C	0	-0.447459	1.152	0.736966	0.514573	0.152003	FALSE	FALSE	FALSE	FALSE	FALSE	FALSE
YDR489W	-0.415037	0.584963	0.678072	2.58496	2.16993	-1.22239	FALSE	FALSE	FALSE	FALSE	FALSE	FALSE
YDR490C	0.584963	-0.222392	1.58496	-1	-1.58496	-0.263034	FALSE	FALSE	FALSE	FALSE	FALSE	FALSE
YDR492W	0	1.32193	0.152003	0.415037	0.180572	-0.289507	TRUE	FALSE	FALSE	FALSE	TRUE	FALSE
YDR493W	3.08746	0.777608	1.848	0.628031	2.02748	1	FALSE	FALSE	FALSE	FALSE	FALSE	FALSE
YDR494W	1.03747	0.887525	2.03953	1.25376	1.71187	0.533432	FALSE	TRUE	FALSE	FALSE	TRUE	TRUE
YDR495C	-2.12928	-0.547488	-0.206451	-0.691878	-0.938599	-0.485427	FALSE	FALSE	FALSE	FALSE	FALSE	TRUE
YDR496C	0.652077	-1.32193	1.39232	-0.415037	1.5502	1.80735	TRUE	FALSE	FALSE	FALSE	FALSE	FALSE
YDR497C	0.302029	0.550197	0.329308	0.341037	0.522227	0	TRUE	TRUE	TRUE	TRUE	TRUE	TRUE
YDR498C	1.75002	2.88753	1.95936	NA	1.58496	2.39855	FALSE	FALSE	FALSE	FALSE	FALSE	FALSE
YDR499W	-0.807355	-3.32193	-0.70044	0.415037	1.1375	-0.263034	FALSE	FALSE	FALSE	FALSE	FALSE	FALSE
YDR500C	3.12992	2.8413	3.38718	3.30117	3.51196	2.21071	TRUE	TRUE	TRUE	TRUE	TRUE	TRUE
YDR500C	NA	NA	NA	NA	NA	NA	FALSE	FALSE	FALSE	FALSE	FALSE	FALSE
YDR501W	0.321928	1.80735	0	2	1.16993	1	FALSE	FALSE	FALSE	FALSE	FALSE	FALSE
YDR502C	1.848	2.58496	1.16993	1.26303	-0.469485	1	FALSE	FALSE	FALSE	FALSE	FALSE	FALSE
YDR503C	NA	NA	2.58496	2.70044	1.90689	3.08746	FALSE	FALSE	FALSE	FALSE	FALSE	FALSE
YDR504C	1.58496	0.70044	2	1.58496	3	0.893085	FALSE	FALSE	FALSE	FALSE	FALSE	FALSE
YDR505C	-1.22239	-0.169925	0	0	-1.37851	0.152003	FALSE	FALSE	FALSE	FALSE	FALSE	FALSE
YDR506C	-1	0.36257	0.222392	-0.263034	0	0.263034	FALSE	FALSE	FALSE	FALSE	FALSE	FALSE
YDR507C	1.71049	2.45943	1.09954	0.485427	1.33703	1.90689	FALSE	FALSE	TRUE	FALSE	FALSE	FALSE
YDR508C	-0.244419	-0.870717	-0.78182	-1.02554	0.328949	-1.20945	TRUE	TRUE	TRUE	TRUE	TRUE	TRUE
YDR510W	-0.554266	-1.78241	-0.463567	-1.469	-0.529858	-1.85148	TRUE	TRUE	TRUE	TRUE	TRUE	TRUE
YDR511W	-0.415037	0.169925	2.70044	0	0.584963	2	FALSE	FALSE	FALSE	FALSE	FALSE	FALSE
YDR512C	NA	NA	NA	NA	NA	NA	FALSE	FALSE	FALSE	FALSE	FALSE	FALSE
YDR513W	0.736966	-0.245112	1.32193	-0.836501	1.45943	-0.660514	FALSE	TRUE	FALSE	FALSE	FALSE	TRUE
YDR514C	-0.241008	1.58496	0.932886	-1.80735	0.765535	1.73697	FALSE	FALSE	FALSE	FALSE	FALSE	FALSE
YDR515W	-0.0995357	-0.485427	-1.80735	-0.169925	-0.616671	-0.211504	FALSE	FALSE	FALSE	FALSE	FALSE	FALSE
YDR516C	2.32193	0.943416	0	0.115477	1.11548	0.961526	FALSE	FALSE	FALSE	FALSE	FALSE	FALSE
YDR517W	0.736966	-0.5025	0.584963	-1.45943	-0.304855	-0.0995357	FALSE	FALSE	FALSE	FALSE	FALSE	FALSE
YDR518W	0	0	1.07039	0	-0.758992	-1.19265	FALSE	FALSE	FALSE	FALSE	FALSE	FALSE
YDR519W	2.80735	-0.584963	-0.736966	NA	0.847997	-1.80735	FALSE	FALSE	FALSE	FALSE	FALSE	FALSE
YDR520C	0.678072	-0.222392	0.807355	-1.22239	0.584963	-0.192645	FALSE	FALSE	FALSE	FALSE	FALSE	FALSE
YDR522C	NA	NA	NA	NA	NA	NA	FALSE	FALSE	FALSE	FALSE	FALSE	FALSE
YDR523C	NA	NA	0	NA	NA	NA	FALSE	FALSE	FALSE	FALSE	FALSE	FALSE
YDR524C	-1.29956	-2.43296	-0.321928	-2.58496	-1.54749	-1.19265	FALSE	FALSE	FALSE	FALSE	FALSE	FALSE
YDR524W-C	NA	NA	NA	NA	NA	NA	FALSE	FALSE	FALSE	FALSE	FALSE	FALSE
YDR524C-B	1.83519	1.29391	2.04367	1.06547	2.18557	1.33866	TRUE	TRUE	TRUE	TRUE	TRUE	TRUE
YDR525W-A	0.415037	0.263034	1.96683	-0.115477	2.4021	0.160465	FALSE	FALSE	FALSE	FALSE	FALSE	FALSE
YDR527W	-0.823122	-0.678072	-0.777608	-0.152003	0.176878	-0.777608	FALSE	FALSE	FALSE	FALSE	TRUE	FALSE
YDR528W	0.563901	1.41504	1.07039	0	0.765535	0.263034	TRUE	FALSE	TRUE	FALSE	TRUE	FALSE
YDR529C	-0.23349	-0.47307	-0.187279	0.14543	0.0242475	-0.245476	TRUE	TRUE	TRUE	TRUE	TRUE	TRUE
YDR530C	1.68281	0.911191	1.22948	0.874469	0.909235	0.847997	TRUE	TRUE	TRUE	TRUE	TRUE	TRUE
YDR531W	0	-1.58496	-1.32193	-1	-0.584963	0	FALSE	FALSE	FALSE	FALSE	FALSE	FALSE
YDR532C	-0.192645	-0.192645	0.415037	1.16993	0.540568	1	FALSE	FALSE	FALSE	FALSE	FALSE	FALSE
YDR533C	-0.106915	-0.222392	0.353637	-0.0824622	0.241008	1.11548	FALSE	TRUE	FALSE	FALSE	FALSE	FALSE
YDR534C	NA	0.415037	-1	-1.80735	NA	-1.22239	FALSE	FALSE	FALSE	FALSE	FALSE	FALSE
YDR536W	2.66297	0.872539	1.58496	1.37685	0.63743	1.33238	FALSE	TRUE	FALSE	TRUE	FALSE	TRUE
YDR538W	1.87447	-0.584963	1.22239	0.584963	2.32193	-1	FALSE	FALSE	FALSE	FALSE	FALSE	FALSE
YDR539W	-0.547488	-1	-0.893085	-0.652077	-1.20945	-1.05445	FALSE	FALSE	FALSE	FALSE	FALSE	FALSE
YDR540C	NA	0	1	NA	0	0	FALSE	FALSE	FALSE	FALSE	FALSE	FALSE
YDR541C	2	0.678072	2.32193	3	1.16993	0.584963	FALSE	FALSE	FALSE	FALSE	FALSE	FALSE
YDR542W	0	0	NA	NA	-2	-0.584963	FALSE	FALSE	FALSE	FALSE	FALSE	FALSE
YDR545W	NA	NA	NA	NA	NA	NA	FALSE	FALSE	FALSE	FALSE	FALSE	FALSE
YEL077C	-1.58496	NA	-2.32193	NA	0	-1.58496	FALSE	FALSE	FALSE	FALSE	FALSE	FALSE
YEL076C-A	-1.58496	1.22239	-1.16993	-2	-1.37851	-0.63743	FALSE	FALSE	FALSE	FALSE	FALSE	FALSE
YEL076C-A	NA	NA	NA	NA	NA	NA	FALSE	FALSE	FALSE	FALSE	FALSE	FALSE
YEL076C	-1.36257	1.22239	-0.807355	-1.80735	-1.1375	-0.415037	FALSE	FALSE	FALSE	FALSE	FALSE	FALSE
YEL075C	NA	NA	NA	NA	NA	NA	FALSE	FALSE	FALSE	FALSE	FALSE	FALSE
YEL073C	-0.70044	0	-2.32193	-3.45943	-2	-1.48543	FALSE	FALSE	FALSE	FALSE	FALSE	FALSE
YEL072W	-3	-1.80735	0	-1.58496	0	-0.736966	FALSE	FALSE	FALSE	FALSE	FALSE	FALSE
YEL071W	0.646363	0.540568	0.936806	0.530515	1.18641	0.201634	TRUE	FALSE	TRUE	FALSE	TRUE	TRUE
YEL070W	NA	NA	NA	NA	NA	NA	FALSE	FALSE	FALSE	FALSE	FALSE	FALSE
YEL069C	NA	NA	NA	NA	NA	NA	FALSE	FALSE	FALSE	FALSE	FALSE	FALSE
YEL067C	NA	NA	NA	NA	NA	NA	FALSE	FALSE	FALSE	FALSE	FALSE	FALSE
YEL066W	-3.39232	-1.87447	-3.63227	-1.80735	-3.23704	-4.05889	FALSE	FALSE	FALSE	FALSE	FALSE	FALSE
YEL065W	1.58496	0	1.64386	1.26303	0.893085	-0.0824622	FALSE	FALSE	FALSE	FALSE	FALSE	FALSE
YEL064C	1	2.58496	NA	NA	NA	NA	FALSE	FALSE	FALSE	FALSE	FALSE	FALSE
YEL063C	1.53051	2.52356	2.76553	2.32193	1.41504	0.874469	FALSE	FALSE	FALSE	FALSE	FALSE	FALSE
YEL062W	-1	1.58496	0.485427	2.80735	2.45943	1.26303	FALSE	FALSE	FALSE	FALSE	FALSE	FALSE
YEL061C	1.80735	0.415037	-0.584963	-1	0.169925	-0.736966	FALSE	FALSE	FALSE	FALSE	FALSE	FALSE
YEL060C	2.62344	3.03905	3.2562	3.16658	3.56971	2.45151	TRUE	TRUE	TRUE	TRUE	TRUE	TRUE
YEL059C-A	NA	4.70044	3.87447	1.16993	4.80735	5	FALSE	FALSE	FALSE	FALSE	FALSE	FALSE
YEL058W	3	1.66297	1.96963	1.70044	3.22882	3.45943	FALSE	FALSE	FALSE	FALSE	FALSE	FALSE
YEL057C	1.5025	0	-1.32193	-1	-0.584963	0.584963	FALSE	FALSE	FALSE	FALSE	FALSE	FALSE
YEL056W	4.61471	2.66297	3.3505	5	3.56071	3.5025	FALSE	FALSE	FALSE	FALSE	FALSE	FALSE
YEL055C	-0.678072	-0.652077	-0.0473057	0.415037	-0.175087	-1.52356	TRUE	FALSE	TRUE	FALSE	TRUE	FALSE
YEL054C	0.872888	1.12928	1.66051	1.70044	1.26442	0.862496	TRUE	TRUE	TRUE	TRUE	TRUE	TRUE
YEL053C	0.36257	2	2.32193	0	-0.485427	0	FALSE	FALSE	FALSE	FALSE	FALSE	FALSE
YEL052W	-0.678072	-0.678072	1.41504	-0.415037	1.11548	-3	FALSE	FALSE	FALSE	FALSE	FALSE	FALSE
YEL051W	1.65208	2.42626	2.45943	2.41504	2.1964	2.13245	FALSE	FALSE	FALSE	FALSE	FALSE	FALSE
YEL050C	1.56768	1.64386	2.06301	2.078	3.2384	1.85244	TRUE	FALSE	TRUE	FALSE	FALSE	FALSE
YEL049W	NA	NA	NA	NA	NA	-2	FALSE	FALSE	FALSE	FALSE	FALSE	FALSE
YEL048C	0	NA	-0.584963	NA	0.415037	0	FALSE	FALSE	FALSE	FALSE	FALSE	FALSE
YEL047C	-0.263034	0.514573	0.137504	-0.514573	1.11548	-0.160465	FALSE	FALSE	FALSE	FALSE	FALSE	FALSE
YEL046C	0.802963	2.58496	0.76356	1	1.16636	2.10434	TRUE	FALSE	TRUE	FALSE	TRUE	FALSE
YEL044W	0.777608	-0.485427	1.31487	2	0.421464	-0.839535	TRUE	FALSE	TRUE	FALSE	TRUE	FALSE
YEL043W	0.447459	0.70044	0.0874628	1	0.754888	1.37851	TRUE	FALSE	FALSE	FALSE	FALSE	FALSE
YEL042W	1	0.807355	0.884523	1.41504	0.607683	0.777608	FALSE	FALSE	FALSE	FALSE	TRUE	FALSE
YEL041W	0.584963	-0.584963	NA	NA	NA	-1	FALSE	FALSE	FALSE	FALSE	FALSE	FALSE
YEL040W	1.58496	NA	0.807355	2	1.58496	0.736966	FALSE	FALSE	FALSE	FALSE	FALSE	FALSE
YEL039C	-1.58496	-2.25298	-2.16993	-1.16046	-2.41504	-1.38628	FALSE	TRUE	FALSE	TRUE	FALSE	TRUE
YEL038W	0.584963	-0.415037	0.765535	-1	1.32193	-0.415037	FALSE	FALSE	FALSE	FALSE	FALSE	FALSE
YEL037C	-0.0493277	-0.333424	0.238405	-0.196397	0.0403577	0.0437214	TRUE	TRUE	TRUE	TRUE	TRUE	TRUE
YEL036C	1.1375	0.378512	0.459432	2.16993	1.16993	1.32193	FALSE	FALSE	FALSE	FALSE	TRUE	FALSE
YEL035C	-1	1	NA	NA	NA	NA	FALSE	FALSE	FALSE	FALSE	FALSE	FALSE
YEL034W	3.56382	3.46632	3.83946	3.55117	4.18005	3.9622	TRUE	TRUE	TRUE	TRUE	TRUE	TRUE
YEL033W	6.48195	5.55459	6.10369	6.98489	5.70336	5.14975	FALSE	FALSE	FALSE	FALSE	FALSE	TRUE
YEL032W	2.61298	1.61143	2.60881	1.87447	3.20716	1.34577	FALSE	FALSE	TRUE	FALSE	FALSE	TRUE
YEL031W	-0.807355	-0.192645	0.823122	0.321928	1.10692	0.447459	FALSE	FALSE	FALSE	FALSE	FALSE	FALSE
YEL030W	-1.32193	-1.16993	-2.45943	-1.58496	0.584963	-0.485427	FALSE	FALSE	FALSE	FALSE	FALSE	FALSE
YEL029C	-1	NA	-0.847997	NA	-0.263034	-1	FALSE	FALSE	FALSE	FALSE	FALSE	FALSE
YEL027W	1.72583	2.19794	1.79909	1.62803	2.89947	2.07635	TRUE	FALSE	TRUE	FALSE	FALSE	TRUE
YEL026W	3.74894	3.58496	2.65208	2.90689	3.42626	3.06609	FALSE	FALSE	FALSE	FALSE	FALSE	FALSE
YEL025C	0.584963	1.32193	0	1	2.32193	0	FALSE	FALSE	FALSE	FALSE	FALSE	FALSE
YEL024W	3.70044	2.58496	3.4021	3.77259	3.14684	2.24101	FALSE	FALSE	FALSE	FALSE	FALSE	FALSE
YEL023C	-3.32193	-2.90689	NA	NA	-2.70044	-1	FALSE	FALSE	FALSE	FALSE	FALSE	FALSE
YEL022W	1.70044	2.28011	1.52356	3	1.04182	1.38466	FALSE	FALSE	FALSE	FALSE	FALSE	FALSE
YEL021W	NA	NA	NA	NA	NA	NA	FALSE	FALSE	FALSE	FALSE	FALSE	FALSE
YEL020W-A	0.370368	0.85561	1.42531	0.912537	1.05733	1.2115	TRUE	TRUE	TRUE	FALSE	TRUE	FALSE
YEL020C	-1.11548	-2.58496	-1	-0.807355	-1.26303	0.584963	FALSE	FALSE	FALSE	FALSE	FALSE	FALSE
YEL019C	0.415037	NA	-2	-1	0.415037	-1.58496	FALSE	FALSE	FALSE	FALSE	FALSE	FALSE
YEL018W	0.395929	0.402098	1.04182	1.68806	0.359542	0.662965	TRUE	TRUE	TRUE	FALSE	TRUE	TRUE
YEL017C-A	-0.871676	-0.695994	-0.4458	-1.26303	-0.420576	-0.807355	TRUE	TRUE	TRUE	FALSE	TRUE	TRUE
YEL017W	2.24793	1.1375	1.16993	0.736966	1.71049	0.447459	FALSE	FALSE	FALSE	FALSE	FALSE	FALSE
YEL016C	-0.400538	0.222392	0.263034	0.736966	-0.857981	0.917538	TRUE	FALSE	FALSE	FALSE	FALSE	FALSE
YEL015W	2.53874	2.3505	3.07682	1.52083	2.51896	1.57154	TRUE	TRUE	FALSE	TRUE	TRUE	TRUE
YEL013W	-0.736966	0.241008	-0.0703893	-1.76553	-0.222392	-1.08746	FALSE	FALSE	TRUE	FALSE	FALSE	FALSE
YEL012W	1.28951	2.32193	2.32193	1.08246	1.66985	1.48543	FALSE	FALSE	FALSE	FALSE	FALSE	TRUE
YEL012W	NA	NA	NA	NA	NA	NA	FALSE	FALSE	FALSE	FALSE	FALSE	FALSE
YEL011W	1.58496	-0.280108	-0.169925	0.222392	-0.807355	0.63743	FALSE	FALSE	FALSE	FALSE	FALSE	TRUE
YEL009C	2.79909	2.73697	2.16474	2.80735	2.7625	2.16398	TRUE	FALSE	TRUE	FALSE	TRUE	TRUE
YEL007W	-0.925999	-0.925999	-0.289507	0.192645	-0.263034	-1.58496	FALSE	FALSE	FALSE	FALSE	FALSE	FALSE
YEL006W	-1.152	0.777608	1.70044	1.1375	0.736966	0.547488	FALSE	FALSE	FALSE	FALSE	FALSE	FALSE
YEL005C	-0.584963	-0.485427	1	1.80735	1.22239	0.263034	FALSE	FALSE	FALSE	FALSE	FALSE	FALSE
YEL004W	3.16993	NA	2.08746	NA	3.39232	4.08746	FALSE	FALSE	FALSE	FALSE	FALSE	FALSE
YEL003W	0.678072	-0.628031	0.275634	-0.206451	0.878009	0.0641303	TRUE	FALSE	TRUE	FALSE	TRUE	TRUE
YEL003W	NA	NA	NA	NA	NA	NA	FALSE	FALSE	FALSE	FALSE	FALSE	FALSE
YEL002C	1.5025	2	0.584963	0.807355	-0.304855	1.51457	FALSE	FALSE	FALSE	FALSE	FALSE	FALSE
YEL001C	0.152003	-0.321928	0.197939	-0.662965	1.08092	0	FALSE	FALSE	TRUE	FALSE	TRUE	TRUE
YER001W	3.16993	1	2.32193	0.415037	3.51457	NA	FALSE	FALSE	FALSE	FALSE	FALSE	FALSE
YER002W	-1.20309	-2.05063	-0.771731	-1.19265	-1.11103	-1.80735	TRUE	FALSE	TRUE	FALSE	TRUE	FALSE
YER003C	0.884523	1	1.10236	0.443607	1.25987	1.34792	TRUE	FALSE	TRUE	TRUE	TRUE	TRUE
YER003C	NA	NA	NA	NA	NA	NA	FALSE	FALSE	FALSE	FALSE	FALSE	FALSE
YER004W	0.857981	0	0.561879	0.678072	1.23447	-0.552541	FALSE	FALSE	TRUE	FALSE	FALSE	FALSE
YER005W	-0.247928	-0.36257	0.447459	0	0.36257	-0.584963	FALSE	FALSE	FALSE	FALSE	FALSE	FALSE
YER006W	0.93587	0.247928	0.63005	0.206451	0.449307	0.115477	TRUE	FALSE	TRUE	FALSE	TRUE	TRUE
YER007W	3	0	NA	2	1.1375	NA	FALSE	FALSE	FALSE	FALSE	FALSE	FALSE
YER007C-A	4.16099	4.2854	5.34577	4.37504	5.79874	4.26679	FALSE	FALSE	FALSE	FALSE	FALSE	FALSE
YER007C-A	NA	NA	NA	NA	NA	NA	FALSE	FALSE	FALSE	FALSE	FALSE	FALSE
YER008C	3.41504	1	1.71621	3.45943	2.32193	1.70044	FALSE	FALSE	FALSE	FALSE	FALSE	FALSE
YER009W	-0.0544478	0.209453	0.111893	0.954196	0.308122	0.36257	TRUE	TRUE	TRUE	FALSE	TRUE	TRUE
YER010C	1.1375	0.893085	1.06413	0.36257	1.94342	0.628031	FALSE	FALSE	FALSE	FALSE	FALSE	FALSE
YER011W	-0.736966	NA	2.58496	2.80735	0.263034	3	FALSE	FALSE	FALSE	FALSE	FALSE	FALSE
YER012W	0.942285	1.06274	1.79796	2.4517	1.76121	1.13535	TRUE	TRUE	TRUE	FALSE	TRUE	TRUE
YER013W	1.41504	1	0.807355	0	2.80735	1.22239	FALSE	FALSE	FALSE	FALSE	FALSE	FALSE
YER014W	0.807355	1.73697	3.70044	2.58496	3.45943	2.32193	FALSE	FALSE	FALSE	FALSE	FALSE	FALSE
YER014C-A	NA	NA	NA	NA	NA	NA	FALSE	FALSE	FALSE	FALSE	FALSE	FALSE
YER014C-A	NA	NA	NA	NA	NA	NA	FALSE	FALSE	FALSE	FALSE	FALSE	FALSE
YER015W	NA	-0.584963	1.58496	NA	0.415037	NA	FALSE	FALSE	FALSE	FALSE	FALSE	FALSE
YER016W	1.1375	1.77761	2.88264	1.35364	2.24286	1.63743	FALSE	FALSE	FALSE	FALSE	FALSE	FALSE
YER017C	0.125531	0.807355	0.584963	-0.263034	-0.321928	0.415037	FALSE	FALSE	FALSE	FALSE	FALSE	FALSE
YER018C	0.415037	0.206451	0.152003	2.5025	1.152	1.05889	FALSE	FALSE	FALSE	FALSE	FALSE	FALSE
YER019W	-2.80735	-3	NA	-2.80735	NA	NA	FALSE	FALSE	FALSE	FALSE	FALSE	FALSE
YER019C-A	0.126218	-0.428094	0.288125	0.239827	0.260709	-0.4333	TRUE	TRUE	TRUE	TRUE	TRUE	TRUE
YER020W	-0.140863	-1.4458	0.70044	0.0995357	-0.212545	-0.492396	TRUE	TRUE	TRUE	TRUE	TRUE	TRUE
YER021W	-0.0443941	-0.23816	0.601451	-0.0641303	0.373458	-0.703607	TRUE	TRUE	TRUE	TRUE	TRUE	TRUE
YER022W	2.72247	2.5025	1.46949	3	2.9386	1.09311	FALSE	FALSE	FALSE	FALSE	FALSE	FALSE
YER023W	2.29546	1.58496	2.04439	1.76553	3.2854	2.07039	FALSE	FALSE	FALSE	FALSE	FALSE	FALSE
YER024W	0.584963	0	-1	NA	-0.321928	NA	FALSE	FALSE	FALSE	FALSE	FALSE	FALSE
YER025W	1.33141	1.10434	2.24135	0.568284	1.27701	1.2854	TRUE	TRUE	TRUE	TRUE	TRUE	TRUE
YER026C	1.37037	1.49881	1.49033	1.67807	1.5482	1.62149	TRUE	TRUE	TRUE	TRUE	TRUE	TRUE
YER027C	-2.58496	0.584963	-2.58496	-1.58496	0.678072	0.807355	FALSE	FALSE	FALSE	FALSE	FALSE	FALSE
YER028C	1.09954	-1.58496	-1	0	-2.32193	-1.70044	FALSE	FALSE	FALSE	FALSE	FALSE	FALSE
YER029C	0.378512	0.160465	0.929611	-0.415037	0.678072	0.514573	TRUE	FALSE	TRUE	FALSE	TRUE	FALSE
YER030W	-1.47393	-1.28951	-0.742504	-0.941106	-0.570749	-1.05733	TRUE	FALSE	TRUE	TRUE	TRUE	TRUE
YER031C	0.86755	1.07039	1.76407	1.37851	1.41504	1.3523	TRUE	TRUE	TRUE	TRUE	TRUE	TRUE
YER032W	2	0.584963	1.38702	2.58496	2.23704	1.48543	FALSE	FALSE	FALSE	FALSE	FALSE	FALSE
YER033C	-1.48543	-2.57154	-1.08746	-3.64386	-1.64386	-3.49185	FALSE	FALSE	FALSE	FALSE	FALSE	FALSE
YER034W	0.394279	0.0931094	0.490326	1.09115	1.22781	0.686842	TRUE	TRUE	TRUE	TRUE	TRUE	TRUE
YER035W	0.298341	0.0874628	0.259087	0.744441	0.546143	0.242857	TRUE	TRUE	TRUE	TRUE	TRUE	TRUE
YER036C	-0.793549	-1.22239	0.188445	-0.395929	0.243271	-0.367732	TRUE	FALSE	TRUE	FALSE	TRUE	TRUE
YER037W	-1.70044	-0.77259	-0.152003	-0.321928	-0.263034	0	FALSE	TRUE	FALSE	FALSE	FALSE	TRUE
YER038C	-0.736966	0	-1	NA	0	-1	FALSE	FALSE	FALSE	FALSE	FALSE	FALSE
YER039C	NA	1.58496	NA	1.58496	NA	-0.321928	FALSE	FALSE	FALSE	FALSE	FALSE	FALSE
YER039C-A	NA	3.70044	2.80735	2.32193	NA	NA	FALSE	FALSE	FALSE	FALSE	FALSE	FALSE
YER040W	-0.485427	-0.36257	-0.163499	0	-0.184425	-1	TRUE	FALSE	TRUE	FALSE	TRUE	FALSE
YER041W	1.58496	0.736966	2.32193	0.584963	1.58496	2.32193	FALSE	FALSE	FALSE	FALSE	FALSE	FALSE
YER042W	-0.788496	1	0.241008	-1.22239	-0.321928	-1.09954	FALSE	FALSE	FALSE	FALSE	FALSE	FALSE
YER043C	-0.0534393	0.0395284	0.0554951	-0.465664	0.116193	-0.415037	TRUE	TRUE	TRUE	TRUE	TRUE	TRUE
YER044C	2.80735	2	NA	1.58496	1.58496	3.05889	FALSE	FALSE	FALSE	FALSE	FALSE	FALSE
YER044C-A	NA	NA	NA	NA	NA	NA	FALSE	FALSE	FALSE	FALSE	FALSE	FALSE
YER044C-A	NA	NA	NA	NA	NA	NA	FALSE	FALSE	FALSE	FALSE	FALSE	FALSE
YER045C	2.32193	1.58496	0	NA	2	0	FALSE	FALSE	FALSE	FALSE	FALSE	FALSE
YER046W	-0.530515	0.736966	-0.29956	0.36257	-0.321928	1.26303	FALSE	FALSE	FALSE	FALSE	TRUE	FALSE
YER047C	-1.87447	-1.58496	-0.222392	-3	-1.67807	-1.65208	FALSE	FALSE	FALSE	FALSE	FALSE	FALSE
YER048C	0.765535	2.08746	1.37851	1.80735	1.1964	2	TRUE	FALSE	FALSE	FALSE	TRUE	FALSE
YER048W-A	1.80735	0.736966	1.35755	1.65208	1	1.05445	FALSE	TRUE	FALSE	FALSE	FALSE	TRUE
YER049W	1.90689	2.80735	3.2854	NA	3.58496	1.71621	FALSE	FALSE	FALSE	FALSE	FALSE	FALSE
YER050C	-1.25376	-0.867896	-1.12928	-1.67807	-1.52356	-1.59368	TRUE	TRUE	TRUE	TRUE	TRUE	TRUE
YER051W	-1	1.26303	1.18442	1	-0.652077	1.08746	FALSE	FALSE	FALSE	FALSE	FALSE	FALSE
YER052C	0.387023	-0.63743	-0.607683	-0.469485	0.122857	-0.169925	TRUE	FALSE	TRUE	FALSE	TRUE	FALSE
YER053C	1.58496	2.38247	3.16993	1.96347	3.45943	1.60666	FALSE	FALSE	FALSE	FALSE	FALSE	TRUE
YER053C-A	-0.823122	-0.208108	0.115477	0.0138058	-0.0874628	0.0621565	FALSE	TRUE	TRUE	TRUE	FALSE	TRUE
YER054C	-0.321928	-1.07276	-1.11548	-1.44746	-0.584963	-1.07039	FALSE	TRUE	FALSE	TRUE	FALSE	TRUE
YER055C	-1.81714	-0.63743	-0.452512	-0.459432	-0.750022	-1.5502	TRUE	FALSE	TRUE	FALSE	TRUE	FALSE
YER056C	1.89308	1.32193	2.02975	1.22239	1.26849	1.58496	TRUE	FALSE	FALSE	FALSE	TRUE	FALSE
YER056C-A	0.476296	0.970129	1.22553	1.08964	1.40808	0.986579	TRUE	TRUE	TRUE	TRUE	TRUE	TRUE
YER056C-A	NA	NA	NA	NA	NA	NA	FALSE	FALSE	FALSE	FALSE	FALSE	FALSE
YER057C	2.26849	1.68281	1.25634	1.94342	1.96782	1.72247	TRUE	FALSE	TRUE	FALSE	TRUE	TRUE
YER058W	2.71272	1.63743	2.20163	2.1375	2.38606	2.02237	FALSE	FALSE	FALSE	FALSE	TRUE	FALSE
YER059W	-2	-1.17834	-2.05063	-2.09954	-1.25376	-1.76553	FALSE	FALSE	FALSE	FALSE	FALSE	FALSE
YER060W	-0.415037	NA	NA	1	0	NA	FALSE	FALSE	FALSE	FALSE	FALSE	FALSE
YER060W-A	NA	NA	NA	NA	NA	NA	FALSE	FALSE	FALSE	FALSE	FALSE	FALSE
YER061C	2.70044	2.45943	1.58496	2.45943	NA	1.45943	FALSE	FALSE	FALSE	FALSE	FALSE	FALSE
YER062C	2.92057	2.93016	2.63743	3.47158	3.14296	3.33967	FALSE	TRUE	FALSE	TRUE	FALSE	TRUE
YER063W	-0.303392	0.542527	0.415037	0.814444	0.275634	0.457473	TRUE	TRUE	TRUE	TRUE	TRUE	TRUE
YER064C	0.63743	0	0.197939	1	-0.378512	-0.584963	TRUE	TRUE	TRUE	FALSE	TRUE	TRUE
YER065C	-1	-0.70044	-0.415037	-1	0.485427	0.874469	FALSE	FALSE	FALSE	FALSE	FALSE	FALSE
YER066W	-2.53605	-0.485427	-2.58496	-2.9386	-4.70044	-1	FALSE	FALSE	FALSE	FALSE	FALSE	FALSE
YER067W	-0.453173	-1.40914	-0.789782	-0.981543	-0.514573	-0.587898	TRUE	TRUE	TRUE	TRUE	TRUE	TRUE
YER068W	-0.289507	-1.80735	0.192645	0	0	-0.540568	FALSE	FALSE	FALSE	FALSE	FALSE	FALSE
YER069W	2.39232	0.222392	1.54057	1	2.078	2.41504	FALSE	FALSE	FALSE	FALSE	FALSE	FALSE
YER070W	1.17333	0.415037	1.0863	1.68806	1.11548	1.47999	TRUE	FALSE	TRUE	FALSE	TRUE	FALSE
YER071C	0.847997	-2	0.584963	2.58496	1.58496	2	FALSE	FALSE	FALSE	FALSE	FALSE	FALSE
YER072W	0.17897	0.263034	0.0794345	-0.921997	0.399607	-0.773724	TRUE	TRUE	TRUE	FALSE	TRUE	TRUE
YER073W	2.20945	1	1.9386	3.58496	2.03242	4	FALSE	FALSE	FALSE	FALSE	FALSE	FALSE
YER074W	2.36923	2.06228	2.84405	2.66676	2.87339	2.42786	TRUE	TRUE	TRUE	TRUE	TRUE	TRUE
YER074W	NA	NA	NA	NA	NA	NA	FALSE	FALSE	FALSE	FALSE	FALSE	FALSE
YER074W-A	-1.52509	-1.365	-0.684498	-1.56294	-0.55486	-0.4975	TRUE	TRUE	TRUE	TRUE	TRUE	TRUE
YER074W-A	NA	NA	NA	NA	NA	NA	FALSE	FALSE	FALSE	FALSE	FALSE	FALSE
YER074W-A	NA	NA	NA	NA	NA	NA	FALSE	FALSE	FALSE	FALSE	FALSE	FALSE
YER075C	0	0.584963	0.584963	-1.32193	0.415037	0.241008	FALSE	FALSE	FALSE	FALSE	FALSE	FALSE
YER076C	1.48543	1.39232	1.78427	0.241008	2.42626	1.12199	FALSE	FALSE	FALSE	FALSE	FALSE	FALSE
YER077C	NA	NA	NA	NA	-4.85798	-4.16993	FALSE	FALSE	FALSE	FALSE	FALSE	FALSE
YER078C	2	-0.736966	1.22239	0	2.58496	0	FALSE	FALSE	FALSE	FALSE	FALSE	FALSE
YER078W-A	NA	NA	NA	NA	NA	NA	FALSE	FALSE	FALSE	FALSE	FALSE	FALSE
YER079W	1.58496	1.4021	2	1.10692	1.45943	1.92057	FALSE	FALSE	FALSE	FALSE	FALSE	FALSE
YER080W	4.11548	2.61143	3.97982	3.40599	5.30012	3.85798	FALSE	FALSE	FALSE	FALSE	FALSE	FALSE
YER081W	2.09954	1.58496	2.89308	1.47393	2.21632	2.1964	FALSE	FALSE	FALSE	FALSE	FALSE	FALSE
YER082C	-0.584963	1	0.369234	1.45943	0.199309	1.45943	TRUE	FALSE	TRUE	FALSE	TRUE	FALSE
YER083C	0.745427	-0.504043	1.02697	1.22239	1.47621	0.544805	TRUE	TRUE	TRUE	TRUE	TRUE	TRUE
YER085C	NA	NA	0	NA	NA	NA	FALSE	FALSE	FALSE	FALSE	FALSE	FALSE
YER086W	1.58496	2.58496	3.45943	NA	2.08746	2.16993	FALSE	FALSE	FALSE	FALSE	FALSE	FALSE
YER087W	0.485427	0	0.514573	NA	1	1.22239	FALSE	FALSE	FALSE	FALSE	FALSE	FALSE
YER087C-B	0.67084	0.0179219	1.84093	0.882643	1.73935	0.911296	TRUE	TRUE	TRUE	TRUE	TRUE	TRUE
YER088C	1.51937	1.54749	2.44478	1.62449	2.25634	1.04731	FALSE	FALSE	FALSE	FALSE	FALSE	FALSE
YER089C	0.447459	-0.192645	0	-0.584963	-0.152003	-1	FALSE	FALSE	FALSE	FALSE	FALSE	FALSE
YER090W	0.106915	1.22239	0.387023	1.58496	-0.415037	0.115477	FALSE	FALSE	FALSE	FALSE	FALSE	FALSE
YER091C	-0.395485	-0.509674	-0.422691	-0.415037	-0.654671	-0.947533	TRUE	TRUE	TRUE	TRUE	TRUE	TRUE
YER092W	-2.43741	-2.43296	-2.30485	-2.61471	-2.28293	-2.45943	TRUE	FALSE	TRUE	FALSE	TRUE	TRUE
YER093C	1.73697	0.862496	2.22239	1.16993	1.51457	0.469485	FALSE	FALSE	FALSE	FALSE	FALSE	FALSE
YER093C-A	0.691878	0.146841	0.610053	0.556393	0.476438	0.0588937	FALSE	TRUE	FALSE	FALSE	TRUE	TRUE
YER093C-A	NA	NA	NA	NA	NA	NA	FALSE	FALSE	FALSE	FALSE	FALSE	FALSE
YER094C	1.55459	0.405256	0.812914	1	0.498806	0.61891	FALSE	TRUE	TRUE	FALSE	TRUE	TRUE
YER095W	0	-0.874469	0.447459	0.321928	-0.652077	0.222392	FALSE	FALSE	FALSE	FALSE	FALSE	FALSE
YER096W	NA	NA	NA	NA	NA	NA	FALSE	FALSE	FALSE	FALSE	FALSE	FALSE
YER098W	1	0.263034	0	-0.415037	1	-0.152003	FALSE	FALSE	FALSE	FALSE	FALSE	FALSE
YER099C	2	2.08746	1.22239	1	1.78427	0	FALSE	FALSE	FALSE	FALSE	FALSE	FALSE
YER100W	3.15843	3	3.06496	1.79141	2.71049	1.82597	FALSE	FALSE	FALSE	FALSE	TRUE	TRUE
YER101C	1.1375	1.29546	3.80735	2.24793	1.91754	1.28951	FALSE	FALSE	FALSE	FALSE	FALSE	FALSE
YER102W	-5.54579	-7.06609	-8.56224	NA	-6.45533	-6.39232	FALSE	FALSE	FALSE	FALSE	FALSE	FALSE
YER103W	0.807355	0.917538	-0.234465	0.817136	0.387023	1.23879	FALSE	TRUE	FALSE	TRUE	FALSE	TRUE
YER104W	1.52356	0.222392	1.926	1.16993	2.58496	1.58496	FALSE	FALSE	FALSE	FALSE	FALSE	FALSE
YER105C	1.53605	1.58496	1.76553	1	2.8413	1.45943	FALSE	FALSE	FALSE	FALSE	FALSE	FALSE
YER106W	NA	NA	NA	1	NA	NA	FALSE	FALSE	FALSE	FALSE	FALSE	FALSE
YER107C	1.75489	1	2.29956	2.19265	2.40439	1.35364	FALSE	FALSE	FALSE	FALSE	FALSE	FALSE
YER109C	0.93587	0.652077	1.58496	0.847997	0.770518	0.180572	TRUE	FALSE	FALSE	FALSE	FALSE	FALSE
YER110C	2.24793	1.87447	1.52356	3	0.893085	0.906891	FALSE	FALSE	FALSE	FALSE	FALSE	FALSE
YER111C	0.736966	0.807355	1.80735	0.415037	-1	1.73697	FALSE	FALSE	FALSE	FALSE	FALSE	FALSE
YER112W	-0.752072	-0.667425	0.0473057	0.192645	-0.0874628	-0.70044	FALSE	FALSE	TRUE	FALSE	TRUE	FALSE
YER113C	1.41504	1.47393	2	2.70044	2.72247	1.39232	FALSE	FALSE	FALSE	FALSE	FALSE	FALSE
YER114C	-1.70044	-0.736966	-0.866733	-1.44057	-1.4021	-1.06413	FALSE	FALSE	FALSE	FALSE	FALSE	FALSE
YER115C	-2	-2.39232	-1.37851	NA	-1.41504	-2.32193	FALSE	FALSE	FALSE	FALSE	FALSE	FALSE
YER116C	-1.27684	-2.29768	-1.77761	-1.66985	-1.06413	-1.926	TRUE	FALSE	FALSE	FALSE	TRUE	TRUE
YER117W	0.328623	0.547488	0	0.380604	0.393407	0.911944	TRUE	TRUE	TRUE	TRUE	TRUE	TRUE
YER117W	NA	NA	NA	NA	NA	NA	FALSE	FALSE	FALSE	FALSE	FALSE	FALSE
YER118C	1	-1.58496	0.678072	1	0.459432	0.415037	FALSE	FALSE	FALSE	FALSE	FALSE	FALSE
YER119C	0.847997	1.32193	2.32193	1.58496	2.70044	0.415037	FALSE	FALSE	FALSE	FALSE	FALSE	FALSE
YER120W	0.845672	0.928917	0.918316	1.67807	1.33031	0.979822	TRUE	TRUE	TRUE	TRUE	TRUE	TRUE
YER121W	2	0.387023	-2.58496	1.16993	-1	-0.222392	FALSE	FALSE	FALSE	FALSE	FALSE	FALSE
YER122C	1.5025	1.848	1.53051	2.11548	0.893085	1.16993	FALSE	FALSE	FALSE	FALSE	FALSE	FALSE
YER123W	-0.490986	-1.08246	-0.231326	-1.05889	-0.485427	-0.415037	TRUE	FALSE	TRUE	FALSE	TRUE	TRUE
YER124C	2.17991	1.6746	3.06228	2.45943	2.47478	2.21299	TRUE	TRUE	FALSE	FALSE	TRUE	TRUE
YER125W	2.66985	0.965235	2.16993	0.943416	1.58496	1.87447	FALSE	TRUE	FALSE	FALSE	FALSE	FALSE
YER126C	-1.09686	-1.8625	-0.802699	-0.36257	-0.720222	-1.50524	TRUE	FALSE	TRUE	TRUE	TRUE	TRUE
YER127W	0.847997	-0.263034	1	-0.415037	1.62449	NA	FALSE	FALSE	FALSE	FALSE	FALSE	FALSE
YER128W	NA	NA	0.415037	NA	1.16993	0.584963	FALSE	FALSE	FALSE	FALSE	FALSE	FALSE
YER129W	0.347923	0.389947	1	0.605721	0.932886	0.601451	TRUE	TRUE	TRUE	TRUE	TRUE	TRUE
YER130C	0.678072	0.736966	0.523562	0.206451	0.830075	0	TRUE	TRUE	TRUE	FALSE	TRUE	TRUE
YER131W	-5.26534	-3.98995	-5.28804	-5.79874	-5.49871	-6.2555	FALSE	FALSE	FALSE	FALSE	FALSE	FALSE
YER132C	0.807355	0.584963	0.584963	0	-1.41504	0	FALSE	FALSE	FALSE	FALSE	FALSE	FALSE
YER133W	2.01224	1.16398	1.55459	0.927244	1.76553	0.75336	TRUE	TRUE	TRUE	TRUE	TRUE	TRUE
YER133W	NA	NA	NA	NA	NA	NA	FALSE	FALSE	FALSE	FALSE	FALSE	FALSE
YER134C	1.26303	-0.137504	1.19265	1.41504	0.830075	0.643856	FALSE	FALSE	FALSE	FALSE	FALSE	FALSE
YER136W	2	2.16993	1.70044	2	1.22239	1.32193	FALSE	FALSE	FALSE	FALSE	FALSE	FALSE
YER137C	-0.378512	1.32193	1	NA	2.58496	3.32193	FALSE	FALSE	FALSE	FALSE	FALSE	FALSE
YER138W-A	NA	NA	NA	NA	NA	NA	FALSE	FALSE	FALSE	FALSE	FALSE	FALSE
YER139C	2.9386	2.22239	1.28011	3.90689	2.16993	0.584963	FALSE	FALSE	FALSE	FALSE	FALSE	FALSE
YER140W	-1.32193	-1.73697	0.807355	NA	1.11548	-0.169925	FALSE	FALSE	FALSE	FALSE	FALSE	FALSE
YER141W	1.152	0.667425	1.58496	1.16993	1.35364	0.584963	FALSE	FALSE	FALSE	FALSE	FALSE	FALSE
YER142C	0	-1.32193	-0.415037	0	0.63743	-1.16993	FALSE	FALSE	FALSE	FALSE	FALSE	FALSE
YER143W	2.88753	1.04182	2.2854	0.736966	2.51457	2.08746	FALSE	FALSE	FALSE	FALSE	FALSE	FALSE
YER144C	1.58496	-2.32193	0	-1	-1.80735	-1.32193	FALSE	FALSE	FALSE	FALSE	FALSE	FALSE
YER145C	0.0374747	0.584963	2	1	1.58496	0.447459	TRUE	FALSE	FALSE	FALSE	TRUE	FALSE
YER146W	-0.282934	-0.813587	-0.0874628	-1	0.300509	-0.378512	TRUE	TRUE	TRUE	TRUE	TRUE	TRUE
YER147C	-0.807355	-3.32193	0.222392	NA	-0.152003	3	FALSE	FALSE	FALSE	FALSE	FALSE	FALSE
YER148W	-1.08504	-0.768184	-0.543362	-0.225881	-0.895663	-0.279154	TRUE	TRUE	TRUE	TRUE	TRUE	TRUE
YER149C	0	-0.289507	-0.736966	0	0.118644	-1.25376	TRUE	FALSE	FALSE	FALSE	TRUE	FALSE
YER150W	0.196397	-0.346403	0.878694	0.259167	1	0.0729794	TRUE	TRUE	TRUE	TRUE	TRUE	TRUE
YER151C	0.754888	1.25376	0.137504	-0.830075	0.387023	0.378512	FALSE	FALSE	TRUE	FALSE	TRUE	TRUE
YER152C	1.44746	1.53051	2.41504	0.321928	2.45943	1.28011	FALSE	FALSE	FALSE	FALSE	FALSE	FALSE
YER153C	-0.0780025	-0.152003	-0.115477	0.378512	1.32193	-0.137504	FALSE	FALSE	FALSE	FALSE	FALSE	FALSE
YER154W	-0.830075	-2.80735	-0.0740006	-0.263034	-1.11548	0	FALSE	FALSE	FALSE	FALSE	FALSE	FALSE
YER155C	-0.725825	0.807355	0.5025	1.58496	0.874469	1.34792	TRUE	FALSE	TRUE	FALSE	TRUE	TRUE
YER156C	1.2854	1	1.4975	1.32193	2.05889	1.5025	FALSE	FALSE	FALSE	FALSE	FALSE	FALSE
YER157W	0.736966	1.32193	0.736966	0.415037	3.90689	0.584963	FALSE	FALSE	FALSE	FALSE	FALSE	FALSE
YER158C	0.807355	-1	1.41504	0.263034	1.90689	0	FALSE	FALSE	FALSE	FALSE	FALSE	FALSE
YER159C	0.655089	0.452512	0.768674	0.555215	1.12131	0.969194	TRUE	TRUE	TRUE	TRUE	TRUE	TRUE
YER161C	0.750022	-0.459432	1.23447	0.251539	1.67243	0.0458037	TRUE	FALSE	TRUE	TRUE	TRUE	TRUE
YER162C	3.36257	1.16227	2.82597	2.53051	3.07973	2.29768	FALSE	TRUE	FALSE	FALSE	FALSE	FALSE
YER163C	-0.169925	0.485427	0.584963	NA	1.24793	1.16993	FALSE	FALSE	FALSE	FALSE	FALSE	FALSE
YER164W	0.222392	-1.67807	-1	0	0.0824622	0	FALSE	FALSE	FALSE	FALSE	FALSE	FALSE
YER165W	0.542793	0.647698	-0.29956	0.331206	0.073249	-0.473931	TRUE	TRUE	TRUE	TRUE	TRUE	TRUE
YER166W	-1.43812	-1.28293	-0.630766	-2	-1.81943	-1.66985	TRUE	TRUE	TRUE	FALSE	FALSE	TRUE
YER167W	0.383329	1.25376	0.398549	0.289507	1.22239	0.95109	TRUE	FALSE	TRUE	FALSE	FALSE	FALSE
YER168C	2.08746	1.39232	3.52356	4.16993	3.37851	2.61891	FALSE	FALSE	FALSE	FALSE	FALSE	FALSE
YER169W	-0.222392	0.36257	0.137504	0.807355	0.169925	1.80735	FALSE	FALSE	FALSE	FALSE	FALSE	FALSE
YER170W	0.459432	1.848	1.58496	1.09954	1.41504	0.874469	FALSE	FALSE	FALSE	FALSE	FALSE	FALSE
YER171W	1.44057	1.22239	2	0.263034	2	1.19265	FALSE	FALSE	FALSE	FALSE	FALSE	FALSE
YER172C	1.05063	1.87447	1.96683	0.29956	1.3388	1.80735	FALSE	FALSE	FALSE	FALSE	FALSE	FALSE
YER173W	-0.192645	-2.32193	0.777608	1.58496	2.64386	-0.152003	FALSE	FALSE	FALSE	FALSE	FALSE	FALSE
YER174C	0	0.584963	0.485427	-1	0.192645	-1	FALSE	FALSE	FALSE	FALSE	FALSE	FALSE
YER175C	1.22239	2	1.28951	1.32193	0.485427	1.22239	FALSE	FALSE	FALSE	FALSE	FALSE	FALSE
YER175W-A	NA	-3.45943	1	NA	-2.32193	-1.32193	FALSE	FALSE	FALSE	FALSE	FALSE	FALSE
YER176W	1	0	2.66297	3	3.16993	0.736966	FALSE	FALSE	FALSE	FALSE	FALSE	FALSE
YER177W	0.58634	0.340307	1.09979	0.351031	0.935536	0.308348	TRUE	TRUE	TRUE	TRUE	TRUE	TRUE
YER178W	0.736966	1.08017	0.820451	1.9386	2.20163	1	TRUE	TRUE	TRUE	FALSE	TRUE	TRUE
YER179W	NA	0	NA	NA	NA	NA	FALSE	FALSE	FALSE	FALSE	FALSE	FALSE
YER179W	NA	NA	NA	NA	NA	NA	FALSE	FALSE	FALSE	FALSE	FALSE	FALSE
YER180C	0.658963	0.678072	3.32193	0.736966	0.5025	-1.1375	FALSE	FALSE	FALSE	FALSE	FALSE	FALSE
YER180C-A	3.80735	2.87447	3.05889	2.45943	3.62449	2.08746	FALSE	FALSE	FALSE	FALSE	FALSE	FALSE
YER182W	2.08746	3.5025	1.87447	3	4	1.53605	FALSE	FALSE	FALSE	FALSE	FALSE	FALSE
YER183C	NA	NA	-2.80735	NA	NA	NA	FALSE	FALSE	FALSE	FALSE	FALSE	FALSE
YER184C	-0.459432	-0.584963	-0.530515	0	-1.48543	-2	FALSE	FALSE	FALSE	FALSE	FALSE	FALSE
YER185W	0.321928	-2	-1.70044	-2.80735	0.415037	0.263034	FALSE	FALSE	FALSE	FALSE	FALSE	FALSE
YER186C	0.823122	0.459432	-0.765535	0.263034	0.514573	-0.321928	FALSE	FALSE	FALSE	FALSE	FALSE	FALSE
YER187W	NA	NA	NA	NA	NA	NA	FALSE	FALSE	FALSE	FALSE	FALSE	FALSE
YER188C-A	NA	1.58496	-1	-0.584963	1	NA	FALSE	FALSE	FALSE	FALSE	FALSE	FALSE
YER189W	NA	NA	NA	NA	NA	NA	FALSE	FALSE	FALSE	FALSE	FALSE	FALSE
YER190W	-1.70044	-1.16993	-1.16993	-0.263034	-1.152	-0.736966	FALSE	FALSE	FALSE	FALSE	FALSE	FALSE
YER190C-B	NA	NA	NA	0	NA	NA	FALSE	FALSE	FALSE	FALSE	FALSE	FALSE
YFL068W	NA	NA	NA	NA	NA	NA	FALSE	FALSE	FALSE	FALSE	FALSE	FALSE
YFL067W	NA	NA	NA	NA	NA	NA	FALSE	FALSE	FALSE	FALSE	FALSE	FALSE
YFL066C	NA	NA	NA	NA	NA	NA	FALSE	FALSE	FALSE	FALSE	FALSE	FALSE
YFL065C	2.02385	1.91754	2.11548	1.20163	2.12553	1.39855	FALSE	FALSE	FALSE	FALSE	FALSE	FALSE
YFL064C	NA	NA	NA	NA	NA	NA	FALSE	FALSE	FALSE	FALSE	FALSE	FALSE
YFL062W	NA	NA	NA	NA	NA	NA	FALSE	FALSE	FALSE	FALSE	FALSE	FALSE
YFL061W	NA	NA	NA	NA	NA	NA	FALSE	FALSE	FALSE	FALSE	FALSE	FALSE
YFL060C	1.32193	-1	2.45943	1.58496	0.736966	1.58496	FALSE	FALSE	FALSE	FALSE	FALSE	FALSE
YFL059W	-1.80735	0.415037	-1.58496	NA	-1.87447	-3.45943	FALSE	FALSE	FALSE	FALSE	FALSE	FALSE
YFL058W	NA	NA	NA	NA	NA	NA	FALSE	FALSE	FALSE	FALSE	FALSE	FALSE
YFL057C	1.64386	0.36257	0.115477	0.584963	1.22239	0	FALSE	FALSE	FALSE	FALSE	FALSE	FALSE
YFL056C	-2	NA	-1	NA	1	NA	FALSE	FALSE	FALSE	FALSE	FALSE	FALSE
YFL055W	NA	0	NA	NA	NA	1.58496	FALSE	FALSE	FALSE	FALSE	FALSE	FALSE
YFL054C	-1.22239	0.263034	0	-1.73697	-1.32193	0	FALSE	FALSE	FALSE	FALSE	FALSE	FALSE
YFL053W	NA	NA	NA	NA	NA	NA	FALSE	FALSE	FALSE	FALSE	FALSE	FALSE
YFL052W	NA	NA	NA	NA	NA	NA	FALSE	FALSE	FALSE	FALSE	FALSE	FALSE
YFL051C	NA	NA	NA	NA	NA	NA	FALSE	FALSE	FALSE	FALSE	FALSE	FALSE
YFL050C	0.321928	-1.58496	-0.584963	NA	NA	-2	FALSE	FALSE	FALSE	FALSE	FALSE	FALSE
YFL049W	2	0	0	1	2.32193	1.32193	FALSE	FALSE	FALSE	FALSE	FALSE	FALSE
YFL048C	2	NA	1.58496	NA	NA	2	FALSE	FALSE	FALSE	FALSE	FALSE	FALSE
YFL047W	-1.16993	-0.736966	-0.893085	-0.584963	-0.584963	-0.807355	FALSE	FALSE	FALSE	FALSE	FALSE	FALSE
YFL046W	1.48543	1.48543	3.47805	2	2.2854	2.12928	FALSE	FALSE	FALSE	FALSE	FALSE	FALSE
YFL045C	2.58496	1.58496	1.20163	1.58496	1.70044	2.73697	FALSE	FALSE	FALSE	FALSE	FALSE	FALSE
YFL044C	-0.440573	0.584963	-0.0824622	0.263034	0.436099	0.862496	FALSE	FALSE	FALSE	FALSE	FALSE	FALSE
YFL042C	2.73697	1.39593	4.32193	2.45943	2.87832	2.0906	FALSE	TRUE	FALSE	FALSE	FALSE	TRUE
YFL041W-A	NA	NA	NA	NA	NA	1.32193	FALSE	FALSE	FALSE	FALSE	FALSE	FALSE
YFL041W	1	2.16993	2.70044	2.5025	4.04439	1.76553	FALSE	FALSE	FALSE	FALSE	FALSE	FALSE
YFL040W	NA	NA	NA	NA	NA	NA	FALSE	FALSE	FALSE	FALSE	FALSE	FALSE
YFL039C	0.928107	0.762961	0.590745	0.852443	0.757023	0.395301	TRUE	TRUE	TRUE	TRUE	TRUE	TRUE
YFL039C	NA	NA	NA	NA	NA	NA	FALSE	FALSE	FALSE	FALSE	FALSE	FALSE
YFL038C	2.63559	1.72935	2.70044	2.51785	3.13124	2.72247	FALSE	FALSE	TRUE	FALSE	TRUE	TRUE
YFL037W	1.53605	1.66297	0.632268	0.584963	1.26303	0.371969	FALSE	FALSE	TRUE	FALSE	FALSE	FALSE
YFL036W	0.552541	1	1.25376	0.387023	0.4975	0.605721	FALSE	FALSE	FALSE	FALSE	FALSE	TRUE
YFL034C-B	1.22239	0.29956	2.848	1.03953	2.25023	1.31034	TRUE	TRUE	FALSE	FALSE	TRUE	TRUE
YFL034C-B	NA	NA	NA	NA	NA	NA	FALSE	FALSE	FALSE	FALSE	FALSE	FALSE
YFL034C-A	-0.398164	0.0259952	0.992911	0.834941	0.552541	1.152	TRUE	TRUE	TRUE	TRUE	TRUE	TRUE
YFL034C-A	NA	NA	NA	NA	NA	NA	FALSE	FALSE	FALSE	FALSE	FALSE	FALSE
YFL034W	0.0339473	0.115477	0.296982	-0.131245	-0.0458037	0.450661	TRUE	TRUE	TRUE	TRUE	TRUE	TRUE
YFL033C	3.32193	1	1.87447	0.584963	NA	3.80735	FALSE	FALSE	FALSE	FALSE	FALSE	FALSE
YFL031W	0.738018	1.39948	0.324107	1.19517	0.303891	1.24725	TRUE	TRUE	TRUE	TRUE	TRUE	TRUE
YFL031W	NA	NA	NA	NA	NA	NA	FALSE	FALSE	FALSE	FALSE	FALSE	FALSE
YFL030W	NA	0	NA	NA	NA	NA	FALSE	FALSE	FALSE	FALSE	FALSE	FALSE
YFL029C	1.87447	1.28011	2.05889	3.08746	2.56635	2.39855	FALSE	FALSE	FALSE	FALSE	FALSE	FALSE
YFL028C	NA	1	2.32193	0.415037	2.32193	0.415037	FALSE	FALSE	FALSE	FALSE	FALSE	FALSE
YFL027C	-0.584963	0.652077	0.415037	3	0.415037	-0.710493	FALSE	FALSE	FALSE	FALSE	FALSE	FALSE
YFL026W	0.31034	0.29956	1.31034	1.19794	1.77372	0.807355	TRUE	TRUE	TRUE	FALSE	TRUE	TRUE
YFL025C	NA	2	1	3.16993	NA	0.736966	FALSE	FALSE	FALSE	FALSE	FALSE	FALSE
YFL024C	-0.469485	-1.65208	-1.82103	-0.917538	-0.696608	-1.2854	FALSE	FALSE	FALSE	FALSE	TRUE	FALSE
YFL023W	0	-2	0.628031	NA	0.847997	-1.58496	FALSE	FALSE	FALSE	FALSE	FALSE	FALSE
YFL022C	-2	NA	0.321928	-1.58496	-1	-1.22239	FALSE	FALSE	FALSE	FALSE	FALSE	FALSE
YFL021W	-1	1.58496	-2.32193	0.678072	-1	0.137504	FALSE	FALSE	FALSE	FALSE	FALSE	FALSE
YFL020C	-0.192645	1	-2	0.678072	0	0	FALSE	FALSE	FALSE	FALSE	FALSE	FALSE
YFL018C	-0.371969	0.0524674	-0.520832	-1.078	-0.621488	-0.859822	FALSE	TRUE	TRUE	FALSE	TRUE	TRUE
YFL017W-A	2.91754	2.29278	2.37851	1.58496	2.09311	1.70044	FALSE	FALSE	TRUE	FALSE	TRUE	TRUE
YFL017C	-0.652077	-1.08746	0.115477	-0.900464	0.116814	-0.584963	TRUE	FALSE	TRUE	FALSE	TRUE	TRUE
YFL016C	2.54057	1.36923	2.75489	1.47999	2.63227	1.53343	FALSE	TRUE	FALSE	FALSE	FALSE	TRUE
YFL014W	1.8985	1.93632	2.46647	1.98195	2.53019	1.87717	TRUE	TRUE	TRUE	TRUE	TRUE	TRUE
YFL013C	1.09954	1.41504	1.93289	1.70044	2.58496	1.39855	FALSE	FALSE	FALSE	FALSE	FALSE	FALSE
YFL012W	NA	NA	NA	NA	NA	NA	FALSE	FALSE	FALSE	FALSE	FALSE	FALSE
YFL011W	NA	NA	NA	NA	NA	NA	FALSE	FALSE	FALSE	FALSE	FALSE	FALSE
YFL010W-A	NA	NA	NA	NA	NA	NA	FALSE	FALSE	FALSE	FALSE	FALSE	FALSE
YFL010C	0	-0.286304	1.22239	0.335603	1.05971	0.495527	TRUE	TRUE	TRUE	TRUE	TRUE	TRUE
YFL009W	0.678072	-0.584963	2.66297	0	1.87447	1.16993	FALSE	FALSE	FALSE	FALSE	FALSE	FALSE
YFL008W	2	1.41504	3.41504	1.58496	4.12928	3.45943	FALSE	FALSE	FALSE	FALSE	FALSE	FALSE
YFL007W	-1.43296	-0.830075	-0.0430687	0.321928	0.415037	0.434403	TRUE	FALSE	TRUE	TRUE	TRUE	TRUE
YFL005W	1.52356	1.18442	2.61471	1.70044	1.94342	1.11548	FALSE	FALSE	FALSE	FALSE	FALSE	FALSE
YFL004W	-0.0780025	-0.241008	0.0671142	0.263034	0.874469	0.710493	FALSE	FALSE	TRUE	FALSE	FALSE	FALSE
YFL003C	NA	NA	NA	NA	NA	NA	FALSE	FALSE	FALSE	FALSE	FALSE	FALSE
YFL002C	1.39232	1.41504	2.39232	-1.58496	0.556393	0.169925	FALSE	FALSE	FALSE	FALSE	FALSE	FALSE
YFL001W	-1.70044	-2.80735	-0.125531	-2.58496	-0.584963	-1.58496	FALSE	FALSE	FALSE	FALSE	FALSE	FALSE
YFR001W	1.71049	3.32193	1.62149	2	1.73697	1.41504	FALSE	FALSE	FALSE	FALSE	FALSE	FALSE
YFR002W	0.289507	1	2.45943	2.58496	2.73697	1	FALSE	FALSE	FALSE	FALSE	FALSE	FALSE
YFR003C	-1.30117	-0.710493	-0.559427	-0.271302	-0.542793	-0.398549	TRUE	TRUE	TRUE	TRUE	TRUE	TRUE
YFR004W	1.5025	1.82597	2.45317	1.83007	2.18763	1.18763	TRUE	TRUE	TRUE	FALSE	TRUE	TRUE
YFR005C	-0.584963	-3	-0.584963	NA	0.678072	NA	FALSE	FALSE	FALSE	FALSE	FALSE	FALSE
YFR006W	-4	-0.415037	0	-2	-0.917538	-0.415037	FALSE	FALSE	FALSE	FALSE	FALSE	FALSE
YFR007W	2	NA	NA	NA	0.263034	NA	FALSE	FALSE	FALSE	FALSE	FALSE	FALSE
YFR008W	0.169925	0.184425	0.612977	0.106915	0.754888	1.24793	FALSE	TRUE	FALSE	FALSE	FALSE	TRUE
YFR009W	2.45943	1.16993	3.75489	0.222392	2.51457	1.87447	FALSE	FALSE	FALSE	FALSE	FALSE	FALSE
YFR010W	1.12199	0.786596	1.41093	0.518467	1.5025	0.89743	TRUE	TRUE	TRUE	TRUE	TRUE	TRUE
YFR011C	-1.19794	-1.63743	-1.09311	-1	-0.345775	-0.765535	FALSE	FALSE	TRUE	FALSE	TRUE	TRUE
YFR012W	NA	NA	NA	NA	NA	NA	FALSE	FALSE	FALSE	FALSE	FALSE	FALSE
YFR012W-A	NA	NA	NA	NA	NA	NA	FALSE	FALSE	FALSE	FALSE	FALSE	FALSE
YFR013W	-0.152003	-0.347923	1.58496	-0.736966	0.736966	1.19265	FALSE	FALSE	FALSE	FALSE	FALSE	FALSE
YFR014C	0.652077	-0.836501	0.447459	-0.688056	0.938599	-0.383329	FALSE	TRUE	FALSE	FALSE	FALSE	TRUE
YFR015C	-0.584963	0.459432	1.41504	0.932886	-0.584963	0.380604	FALSE	TRUE	FALSE	TRUE	FALSE	TRUE
YFR016C	0.125531	-0.169925	0	1	-0.447459	0.0995357	FALSE	FALSE	FALSE	FALSE	FALSE	FALSE
YFR017C	1.80735	1.47644	2.08746	0.758992	0.938599	1.29956	FALSE	TRUE	FALSE	TRUE	FALSE	TRUE
YFR018C	1.39855	2	1.25634	-0.847997	2.3505	0.807355	FALSE	FALSE	FALSE	FALSE	FALSE	FALSE
YFR019W	1.73697	1.66297	1.80735	0.678072	1.77761	1.58496	FALSE	FALSE	FALSE	FALSE	FALSE	FALSE
YFR021W	-0.678072	-2.11548	-1.58496	-3.70044	-1.08746	-1	FALSE	FALSE	FALSE	FALSE	FALSE	FALSE
YFR022W	-0.770518	-0.678072	-0.211504	-0.652077	-0.295456	-0.465664	FALSE	FALSE	FALSE	FALSE	TRUE	TRUE
YFR023W	NA	NA	NA	NA	NA	NA	FALSE	FALSE	FALSE	FALSE	FALSE	FALSE
YFR024C-A	-1	1.58496	-0.736966	1.32193	1	NA	FALSE	FALSE	FALSE	FALSE	FALSE	FALSE
YFR024C-A	NA	NA	NA	NA	NA	NA	FALSE	FALSE	FALSE	FALSE	FALSE	FALSE
YFR025C	4.24793	2.58496	2.28011	2	1.58496	1.58496	FALSE	FALSE	FALSE	FALSE	FALSE	FALSE
YFR026C	0.263034	-0.514573	-0.241008	-1	-0.169925	-0.321928	FALSE	FALSE	FALSE	FALSE	FALSE	FALSE
YFR027W	0.514573	1	2	0.736966	2.22239	3.45943	FALSE	FALSE	FALSE	FALSE	FALSE	FALSE
YFR028C	0.752072	0.5025	0.131245	0.807355	0.736966	-0.662965	FALSE	FALSE	TRUE	FALSE	TRUE	FALSE
YFR029W	0	2.58496	0.415037	NA	-0.584963	-0.415037	FALSE	FALSE	FALSE	FALSE	FALSE	FALSE
YFR030W	2.48543	1.70044	1.90689	3.80735	2.926	3.80735	FALSE	FALSE	FALSE	FALSE	FALSE	FALSE
YFR031C	0.263034	2	1.90689	2.32193	2.58496	1	FALSE	FALSE	FALSE	FALSE	FALSE	FALSE
YFR031C-A	1.5888	2.36678	2.00891	2.02697	2.3552	2.20163	TRUE	TRUE	TRUE	TRUE	TRUE	TRUE
YFR031C-A	NA	NA	NA	NA	NA	NA	FALSE	FALSE	FALSE	FALSE	FALSE	FALSE
YFR032C	NA	NA	NA	NA	NA	NA	FALSE	FALSE	FALSE	FALSE	FALSE	FALSE
YFR032C-A	-3.37851	-5.20945	-4.70044	NA	-5.14975	-3.45943	FALSE	FALSE	FALSE	FALSE	FALSE	FALSE
YFR032C-B	NA	NA	NA	NA	0	NA	FALSE	FALSE	FALSE	FALSE	FALSE	FALSE
YFR033C	1.0126	1.1589	0.712019	0.415037	0.973283	0.293047	TRUE	TRUE	TRUE	TRUE	TRUE	TRUE
YFR034C	1.66482	1	1.9386	1.45943	2.05889	1.86507	TRUE	FALSE	TRUE	FALSE	TRUE	FALSE
YFR035C	NA	NA	NA	NA	NA	NA	FALSE	FALSE	FALSE	FALSE	FALSE	FALSE
YFR036W	1.25873	0.823122	0.354665	0.758992	0.837447	0.374396	TRUE	FALSE	TRUE	FALSE	TRUE	TRUE
YFR037C	3.66297	2.33985	3.98765	2.98351	3.66178	2.88381	FALSE	FALSE	TRUE	FALSE	TRUE	TRUE
YFR038W	-2.05889	-1.32193	-1.58496	-1	-0.36257	-0.584963	FALSE	FALSE	FALSE	FALSE	FALSE	FALSE
YFR039C	3	1.80735	3.80735	2.32193	2.24793	1.58496	FALSE	FALSE	FALSE	FALSE	FALSE	FALSE
YFR040W	0.807355	2.05063	-0.192645	0.807355	-0.0614005	0.245112	FALSE	FALSE	TRUE	FALSE	TRUE	TRUE
YFR041C	3.45943	-0.736966	2.80735	2.16993	1.63743	3.80735	FALSE	FALSE	FALSE	FALSE	FALSE	FALSE
YFR042W	4.08746	NA	3.45943	NA	1.90689	1.11548	FALSE	FALSE	FALSE	FALSE	FALSE	FALSE
YFR043C	-1.32193	0	-2	0.736966	-0.678072	1.22239	FALSE	FALSE	FALSE	FALSE	FALSE	FALSE
YFR044C	-0.415037	0	-0.836501	1.32193	0.0780025	-0.893085	TRUE	FALSE	FALSE	FALSE	FALSE	FALSE
YFR045W	3.16993	3.32193	1.45943	1.67807	1.37851	1.41504	FALSE	FALSE	FALSE	FALSE	FALSE	FALSE
YFR045W	NA	NA	NA	NA	NA	NA	FALSE	FALSE	FALSE	FALSE	FALSE	FALSE
YFR046C	-1.44057	-1.848	-1.65208	NA	-2.45943	-1.32193	FALSE	FALSE	FALSE	FALSE	FALSE	FALSE
YFR047C	-1.32193	-2	-1.9386	-1.26303	-1.18057	-0.584963	FALSE	FALSE	FALSE	FALSE	FALSE	FALSE
YFR048W	1.35364	1.41504	2.5502	2.11548	2.5025	2.14684	FALSE	FALSE	FALSE	FALSE	FALSE	FALSE
YFR049W	3.8413	3.08746	3.56071	2.58496	1.58496	2.62449	FALSE	FALSE	FALSE	FALSE	FALSE	FALSE
YFR050C	3.16993	0.975752	3.14296	1.80735	3.04836	1.93643	FALSE	TRUE	FALSE	FALSE	TRUE	TRUE
YFR051C	2.11548	-0.222392	1.82597	2.22239	1.69188	1.24101	FALSE	FALSE	FALSE	FALSE	FALSE	FALSE
YFR052W	2.76081	1.88753	2.8625	1.60334	3.28716	3.10962	FALSE	TRUE	TRUE	TRUE	TRUE	FALSE
YFR053C	-1.39855	-0.608232	-1.25154	-0.662965	-0.61891	-0.601916	FALSE	TRUE	TRUE	TRUE	TRUE	TRUE
YFR055W	0.807355	-1	-0.192645	2	-0.222392	-1.58496	FALSE	FALSE	FALSE	FALSE	FALSE	FALSE
YFR057W	NA	NA	NA	NA	NA	NA	FALSE	FALSE	FALSE	FALSE	FALSE	FALSE
YGL263W	NA	NA	NA	NA	NA	NA	FALSE	FALSE	FALSE	FALSE	FALSE	FALSE
YGL262W	NA	NA	NA	NA	NA	NA	FALSE	FALSE	FALSE	FALSE	FALSE	FALSE
YGL261C	NA	NA	NA	NA	NA	NA	FALSE	FALSE	FALSE	FALSE	FALSE	FALSE
YGL260W	NA	NA	NA	NA	NA	NA	FALSE	FALSE	FALSE	FALSE	FALSE	FALSE
YGL259W	NA	NA	NA	NA	NA	NA	FALSE	FALSE	FALSE	FALSE	FALSE	FALSE
YGL258W-A	NA	NA	0	NA	NA	1	FALSE	FALSE	FALSE	FALSE	FALSE	FALSE
YGL258W	NA	NA	NA	NA	1	NA	FALSE	FALSE	FALSE	FALSE	FALSE	FALSE
YGL257C	0	0	1	NA	0	0.415037	FALSE	FALSE	FALSE	FALSE	FALSE	FALSE
YGL256W	-3.16993	NA	1.22239	-0.584963	0.289507	-0.321928	FALSE	FALSE	FALSE	FALSE	FALSE	FALSE
YGL255W	1.91617	1.926	2.42742	1.80735	2.51457	2.05063	TRUE	FALSE	TRUE	FALSE	FALSE	FALSE
YGL254W	3	NA	3.52356	NA	2.80735	2	FALSE	FALSE	FALSE	FALSE	FALSE	FALSE
YGL253W	1.80735	1.22239	2.25634	1.87447	1.82103	1.69188	FALSE	FALSE	FALSE	FALSE	FALSE	FALSE
YGL252C	3.16993	1.73697	1.66297	1.22239	1	1.80735	FALSE	FALSE	FALSE	FALSE	FALSE	FALSE
YGL251C	NA	NA	1.58496	NA	NA	1.58496	FALSE	FALSE	FALSE	FALSE	FALSE	FALSE
YGL251C	NA	NA	NA	NA	NA	NA	FALSE	FALSE	FALSE	FALSE	FALSE	FALSE
YGL250W	-2	-2.80735	-1.73697	-1.5025	0.678072	-0.652077	FALSE	FALSE	FALSE	FALSE	FALSE	FALSE
YGL249W	NA	NA	NA	0	0	1	FALSE	FALSE	FALSE	FALSE	FALSE	FALSE
YGL248W	-1.89308	-2.20163	-0.900464	-2.43296	-0.925999	-1.53605	FALSE	FALSE	FALSE	FALSE	FALSE	FALSE
YGL247W	1.73697	-1.41504	1	1	0.736966	0.415037	FALSE	FALSE	FALSE	FALSE	FALSE	FALSE
YGL246C	-2.16993	0	0.807355	NA	0.584963	0.263034	FALSE	FALSE	FALSE	FALSE	FALSE	FALSE
YGL245W	1.20436	0.966833	1.36678	1.73697	1.70782	1.58496	TRUE	TRUE	TRUE	FALSE	TRUE	FALSE
YGL244W	-0.605721	-0.736966	0.423808	-0.0874628	0.584963	0.83289	TRUE	TRUE	TRUE	TRUE	TRUE	TRUE
YGL243W	-3.32193	NA	-4	NA	-4	-3	FALSE	FALSE	FALSE	FALSE	FALSE	FALSE
YGL242C	-0.921997	-0.906891	-0.415037	-2.37851	-0.355095	-0.621488	FALSE	FALSE	TRUE	FALSE	TRUE	TRUE
YGL241W	NA	NA	NA	NA	0.584963	NA	FALSE	FALSE	FALSE	FALSE	FALSE	FALSE
YGL240W	1.22239	-0.736966	1.58496	NA	2.16993	3.16993	FALSE	FALSE	FALSE	FALSE	FALSE	FALSE
YGL238W	0.621488	0.584963	0.893085	0.736966	1.39232	0.63743	FALSE	FALSE	FALSE	FALSE	FALSE	FALSE
YGL237C	-2.58496	-0.847997	-0.415037	-1.18057	-1.04439	0	FALSE	TRUE	TRUE	FALSE	FALSE	TRUE
YGL236C	0	1	0.847997	NA	0.459432	0	FALSE	FALSE	FALSE	FALSE	FALSE	FALSE
YGL235W	NA	NA	NA	NA	NA	NA	FALSE	FALSE	FALSE	FALSE	FALSE	FALSE
YGL234W	1.03747	1.26303	0.807355	2.39232	2.34792	1.14684	FALSE	FALSE	FALSE	FALSE	FALSE	FALSE
YGL233W	0.289507	-0.152003	1	1.41504	0.847997	-0.906891	FALSE	FALSE	FALSE	FALSE	FALSE	FALSE
YGL232W	-1.48543	-4.16993	-1.22239	-2.41504	-0.912537	-2.32193	FALSE	FALSE	FALSE	FALSE	FALSE	FALSE
YGL232W	NA	NA	NA	NA	NA	NA	FALSE	FALSE	FALSE	FALSE	FALSE	FALSE
YGL231C	-0.231326	-1.06413	-0.584963	-1	-1.09516	-1.05658	TRUE	FALSE	TRUE	FALSE	TRUE	TRUE
YGL230C	NA	NA	NA	NA	NA	NA	FALSE	FALSE	FALSE	FALSE	FALSE	FALSE
YGL229C	NA	-0.584963	NA	-1	0	-0.415037	FALSE	FALSE	FALSE	FALSE	FALSE	FALSE
YGL228W	1.76553	1.65208	2.66297	2.80735	3.87447	3.16993	FALSE	FALSE	FALSE	FALSE	FALSE	FALSE
YGL227W	3.16993	4.39232	4.52356	3.70044	3.32193	4.52356	FALSE	FALSE	FALSE	FALSE	FALSE	FALSE
YGL226C-A	3.37851	3.45943	3.24793	3.9542	3.77259	3.90689	FALSE	FALSE	FALSE	FALSE	FALSE	FALSE
YGL226C-A	NA	NA	NA	NA	NA	NA	FALSE	FALSE	FALSE	FALSE	FALSE	FALSE
YGL226W	0	-1.58496	-0.152003	-0.321928	0	-0.807355	FALSE	FALSE	FALSE	FALSE	FALSE	FALSE
YGL225W	0.222392	-0.736966	0.917538	-0.584963	2.32193	0	FALSE	FALSE	FALSE	FALSE	FALSE	FALSE
YGL224C	-0.765535	0	-0.169925	-3.45943	-0.29956	-0.378512	FALSE	FALSE	FALSE	FALSE	FALSE	FALSE
YGL223C	0.830075	0.263034	1.05889	0.378512	-0.440573	-0.691878	FALSE	FALSE	FALSE	FALSE	FALSE	FALSE
YGL222C	-0.0901978	-0.70044	0	0.0857299	-0.554968	-0.435215	TRUE	TRUE	TRUE	TRUE	TRUE	TRUE
YGL221C	-0.0317089	-0.0524674	-0.0995357	-1.03747	0.465664	-0.269187	TRUE	TRUE	TRUE	FALSE	TRUE	TRUE
YGL220W	NA	-2.80735	NA	NA	NA	NA	FALSE	FALSE	FALSE	FALSE	FALSE	FALSE
YGL219C	0.263034	-1.10692	1.44057	-0.106915	1.49476	-0.765535	FALSE	FALSE	FALSE	FALSE	FALSE	TRUE
YGL216W	-0.584963	-1	0	-1.80735	1.22239	0.847997	FALSE	FALSE	FALSE	FALSE	FALSE	FALSE
YGL215W	-3.12199	-3.20511	-2.30581	-2.2303	-2.48308	-2.1375	FALSE	FALSE	FALSE	FALSE	TRUE	TRUE
YGL213C	3.16993	1.80735	NA	NA	4.24793	5.08746	FALSE	FALSE	FALSE	FALSE	FALSE	FALSE
YGL212W	NA	NA	0.584963	0	-0.584963	NA	FALSE	FALSE	FALSE	FALSE	FALSE	FALSE
YGL211W	1.52356	2.32193	1.80735	0.263034	1.22239	2	FALSE	FALSE	FALSE	FALSE	FALSE	FALSE
YGL210W	0.70044	1.22239	1.34104	0	0.786596	1.67807	TRUE	FALSE	TRUE	FALSE	TRUE	FALSE
YGL209W	0.925999	0.283793	0.941897	0.160465	1.0156	1.20945	TRUE	TRUE	TRUE	FALSE	TRUE	FALSE
YGL208W	1	1.09954	2.848	2.11548	2	2.41504	FALSE	FALSE	FALSE	FALSE	FALSE	FALSE
YGL207W	1.37851	1.75489	1.39855	1.90689	1.03747	2.03953	FALSE	FALSE	FALSE	FALSE	FALSE	FALSE
YGL206C	0.263034	0.241008	0.530515	0	0.115477	1.80735	FALSE	FALSE	FALSE	FALSE	FALSE	FALSE
YGL205W	-1	-2.32193	NA	-1.58496	NA	NA	FALSE	FALSE	FALSE	FALSE	FALSE	FALSE
YGL203C	NA	2.58496	0.485427	1	-0.192645	1.32193	FALSE	FALSE	FALSE	FALSE	FALSE	FALSE
YGL202W	0.026967	1.16046	-0.0588937	0.106915	0.736966	1.02308	TRUE	FALSE	TRUE	TRUE	TRUE	TRUE
YGL201C	1.70044	1.11548	2.58496	2.9542	2.43741	3.45943	FALSE	FALSE	FALSE	FALSE	FALSE	FALSE
YGL200C	0.575115	0.537657	1.62709	1.77259	1.40498	1	TRUE	TRUE	TRUE	FALSE	TRUE	TRUE
YGL198W	0.36257	-2.1375	1.05445	0.584963	0.947533	0	FALSE	FALSE	FALSE	FALSE	FALSE	FALSE
YGL197W	0.628031	0.469485	0.678072	1	2.24793	0.678072	FALSE	FALSE	FALSE	FALSE	FALSE	FALSE
YGL196W	1.22239	1.70044	2.58496	1.41504	1.58496	2	FALSE	FALSE	FALSE	FALSE	FALSE	FALSE
YGL195W	3.22239	0.137504	4.08746	-0.415037	3.90689	1.848	FALSE	FALSE	FALSE	FALSE	FALSE	FALSE
YGL194C-A	1.32193	2.80735	NA	0.736966	0.847997	1	FALSE	FALSE	FALSE	FALSE	FALSE	FALSE
YGL194C	-0.874469	0.584963	0.874469	1.58496	0.847997	1.16993	FALSE	FALSE	FALSE	FALSE	FALSE	FALSE
YGL193C	0.830075	0	0.321928	-0.777608	-0.263034	-0.514573	FALSE	FALSE	FALSE	FALSE	FALSE	FALSE
YGL192W	NA	NA	NA	NA	NA	NA	FALSE	FALSE	FALSE	FALSE	FALSE	FALSE
YGL191W	-1	-1.30485	0.192645	-0.369234	-0.900464	-0.14439	FALSE	FALSE	TRUE	TRUE	TRUE	TRUE
YGL190C	-0.427421	-0.83289	-0.841302	-0.724366	-1.09516	-0.941897	TRUE	TRUE	TRUE	TRUE	TRUE	TRUE
YGL189C	-3.93641	-4.37311	-4.26896	-5.40561	-4.56932	-4.90966	TRUE	TRUE	TRUE	FALSE	TRUE	TRUE
YGL188C-A	3.72015	4.27177	4.85283	5.35923	4.86815	5.6313	TRUE	TRUE	TRUE	TRUE	TRUE	TRUE
YGL187C	-2.26303	-1	-1	-1.58496	-4.16993	-1	FALSE	FALSE	FALSE	FALSE	FALSE	FALSE
YGL186C	1.52356	1.80735	3.16993	-0.415037	2.07039	1.45943	FALSE	FALSE	FALSE	FALSE	FALSE	FALSE
YGL185C	4.90689	2.32193	5	3.80735	5.12928	3.20945	FALSE	FALSE	FALSE	FALSE	FALSE	FALSE
YGL184C	2.37851	1.58496	1.25376	1.22239	2.9386	3.64386	FALSE	FALSE	FALSE	FALSE	FALSE	FALSE
YGL183C	-0.263034	0.263034	0.584963	0.415037	0.36257	0.584963	FALSE	FALSE	FALSE	FALSE	FALSE	FALSE
YGL183C	NA	NA	NA	NA	NA	NA	FALSE	FALSE	FALSE	FALSE	FALSE	FALSE
YGL181W	-0.514573	0.514573	0.192645	0.192645	0.514573	-0.584963	FALSE	FALSE	FALSE	FALSE	FALSE	FALSE
YGL180W	-0.222392	1.45943	1.08746	-1.11548	0.906891	0.211504	FALSE	FALSE	FALSE	FALSE	FALSE	FALSE
YGL179C	2	-1	0	-0.584963	-2.58496	NA	FALSE	FALSE	FALSE	FALSE	FALSE	FALSE
YGL178W	-0.180572	-0.836501	-0.807355	-0.263034	-1.64386	-1.45943	FALSE	FALSE	FALSE	FALSE	FALSE	FALSE
YGL178W	NA	NA	NA	NA	NA	NA	FALSE	FALSE	FALSE	FALSE	FALSE	FALSE
YGL176C	2.16993	3.80735	1.76553	2	NA	1.58496	FALSE	FALSE	FALSE	FALSE	FALSE	FALSE
YGL175C	2	NA	NA	NA	1.58496	2.58496	FALSE	FALSE	FALSE	FALSE	FALSE	FALSE
YGL174W	-2.36923	-2.58496	-0.847997	-1.67807	-1.64386	-1.8365	FALSE	FALSE	FALSE	FALSE	FALSE	FALSE
YGL173C	0.249978	0.271302	0.436099	-0.616671	0.70044	0.628031	TRUE	TRUE	FALSE	FALSE	FALSE	TRUE
YGL172W	2.15754	3.45943	1.91254	2.97982	1.27462	1.89077	TRUE	FALSE	FALSE	FALSE	TRUE	TRUE
YGL171W	1.72935	1	2.04439	1.41504	2.74147	1.90689	FALSE	FALSE	FALSE	FALSE	FALSE	FALSE
YGL170C	NA	NA	NA	NA	NA	NA	FALSE	FALSE	FALSE	FALSE	FALSE	FALSE
YGL169W	0.125531	1	0.321928	0	-0.415037	NA	FALSE	FALSE	FALSE	FALSE	FALSE	FALSE
YGL168W	NA	NA	NA	NA	NA	NA	FALSE	FALSE	FALSE	FALSE	FALSE	FALSE
YGL167C	1.79586	1.4021	1.51706	0.748461	1.49683	1.87447	TRUE	TRUE	TRUE	TRUE	TRUE	TRUE
YGL166W	-0.280108	-0.900464	0.423808	-0.353637	0.415037	0.426265	TRUE	FALSE	TRUE	FALSE	TRUE	TRUE
YGL164C	-0.678072	0.263034	1	0	1	0.847997	FALSE	FALSE	FALSE	FALSE	FALSE	FALSE
YGL163C	0.95109	0.106915	3.32193	0.584963	2.1375	0	FALSE	FALSE	FALSE	FALSE	FALSE	FALSE
YGL162W	0.473931	1.70044	2.32193	1.51457	1	1.23704	FALSE	FALSE	FALSE	FALSE	TRUE	FALSE
YGL161C	-0.295456	-1	0.415037	-1.11548	0.175087	-0.547488	TRUE	TRUE	TRUE	FALSE	TRUE	TRUE
YGL160W	1.32193	0.192645	1.32193	-0.321928	1.41504	1.80735	FALSE	FALSE	FALSE	FALSE	FALSE	FALSE
YGL159W	0	2.32193	NA	NA	2.32193	NA	FALSE	FALSE	FALSE	FALSE	FALSE	FALSE
YGL158W	0	2.22239	NA	2.45943	NA	1.1375	FALSE	FALSE	FALSE	FALSE	FALSE	FALSE
YGL157W	-0.0614005	-0.0384741	0.321928	-0.371969	0.736966	-0.2824	TRUE	TRUE	FALSE	FALSE	FALSE	TRUE
YGL156W	0	0.584963	0.917538	-1.37851	1.09954	0.160465	FALSE	FALSE	FALSE	FALSE	FALSE	FALSE
YGL155W	0.874469	0.485427	0.678072	-1.58496	-0.807355	-0.415037	FALSE	FALSE	FALSE	FALSE	FALSE	FALSE
YGL154C	NA	1	NA	NA	NA	NA	FALSE	FALSE	FALSE	FALSE	FALSE	FALSE
YGL153W	4.30378	3.8413	4.44057	3.5025	3.95936	4.64386	FALSE	FALSE	FALSE	FALSE	FALSE	FALSE
YGL151W	1.37851	1.36257	1.8365	1.32193	1.45943	1.90689	FALSE	FALSE	FALSE	FALSE	FALSE	FALSE
YGL150C	2.24793	2.38466	1.77761	1.73697	1.32193	1.06413	FALSE	FALSE	FALSE	FALSE	FALSE	FALSE
YGL148W	1.63005	2.18442	1.24793	1.51096	1.76407	1.66513	TRUE	FALSE	TRUE	TRUE	TRUE	TRUE
YGL147C	1.47705	2.0282	1.70044	1.86129	2.23827	1.8606	TRUE	TRUE	TRUE	TRUE	TRUE	TRUE
YGL146C	0.222392	-0.415037	0.222392	1.73697	0.415037	-0.584963	FALSE	FALSE	FALSE	FALSE	FALSE	FALSE
YGL145W	-1.44057	-2.58496	-2	-2.58496	-1.24793	-1.58496	FALSE	FALSE	FALSE	FALSE	FALSE	FALSE
YGL144C	-0.440573	0.222392	-0.807355	2	0.337035	0.169925	FALSE	FALSE	FALSE	FALSE	FALSE	FALSE
YGL143C	3.90689	NA	4.70044	1.58496	NA	1	FALSE	FALSE	FALSE	FALSE	FALSE	FALSE
YGL142C	0	1.22239	-0.415037	NA	2.32193	0.584963	FALSE	FALSE	FALSE	FALSE	FALSE	FALSE
YGL141W	-0.263034	0.459432	1.09311	-0.0931094	0.691878	0.211504	TRUE	FALSE	FALSE	FALSE	FALSE	FALSE
YGL140C	-1.90689	-3.75489	-2.22239	-0.485427	-0.415037	-0.378512	FALSE	FALSE	FALSE	FALSE	FALSE	FALSE
[truncated: 4,057 more rows]

## Sheet: uEvsdE
gene	wt_0_uEvsdE	wt_30_uEvsdE	lsm1_0_uEvsdE	lsm1_30_uEvsdE	pat1_0_uEvsdE	pat1_30_uEvsdE	wt_0_uEvsdE_f	wt_30_uEvsdE_f	lsm1_0_uEvsdE_f	lsm1_30_uEvsdE_f	pat1_0_uEvsdE_f	pat1_30_uEvsdE_f
YAL068C	NA	NA	NA	NA	NA	NA	FALSE	FALSE	FALSE	FALSE	FALSE	FALSE
YAL067W-A	NA	NA	NA	NA	NA	NA	FALSE	FALSE	FALSE	FALSE	FALSE	FALSE
YAL067C	NA	NA	NA	NA	NA	NA	FALSE	FALSE	FALSE	FALSE	FALSE	FALSE
YAL065C	NA	NA	NA	NA	NA	NA	FALSE	FALSE	FALSE	FALSE	FALSE	FALSE
YAL064W-B	NA	NA	NA	NA	NA	NA	FALSE	FALSE	FALSE	FALSE	FALSE	FALSE
YAL064C-A	NA	NA	NA	NA	NA	NA	FALSE	FALSE	FALSE	FALSE	FALSE	FALSE
YAL064W	NA	0	NA	NA	NA	0	FALSE	FALSE	FALSE	FALSE	FALSE	FALSE
YAL063C-A	NA	NA	NA	NA	NA	NA	FALSE	FALSE	FALSE	FALSE	FALSE	FALSE
YAL063C	NA	NA	NA	NA	NA	NA	FALSE	FALSE	FALSE	FALSE	FALSE	FALSE
YAL062W	NA	NA	NA	NA	NA	NA	FALSE	FALSE	FALSE	FALSE	FALSE	FALSE
YAL061W	-1.15754	0.754244	-0.289507	0.571157	-1.22239	0.197939	FALSE	TRUE	FALSE	TRUE	FALSE	TRUE
YAL060W	NA	NA	NA	NA	NA	NA	FALSE	FALSE	FALSE	FALSE	FALSE	FALSE
YAL059W	0	-1.58496	0.584963	NA	0	NA	FALSE	FALSE	FALSE	FALSE	FALSE	FALSE
YAL058W	NA	1	0	NA	0	1.58496	FALSE	FALSE	FALSE	FALSE	FALSE	FALSE
YAL056W	NA	NA	NA	NA	NA	NA	FALSE	FALSE	FALSE	FALSE	FALSE	FALSE
YAL055W	1	1.58496	0	2	1.32193	1	FALSE	FALSE	FALSE	FALSE	FALSE	FALSE
YAL054C	NA	0	NA	NA	-0.584963	1.58496	FALSE	FALSE	FALSE	FALSE	FALSE	FALSE
YAL053W	NA	NA	NA	NA	3.70044	NA	FALSE	FALSE	FALSE	FALSE	FALSE	FALSE
YAL051W	2.32193	1.80735	-1.58496	1.58496	-0.485427	0.736966	FALSE	FALSE	FALSE	FALSE	FALSE	FALSE
YAL049C	0.584963	0.263034	1	1	0.192645	0.70044	FALSE	FALSE	FALSE	FALSE	FALSE	FALSE
YAL048C	-2.43296	-0.125531	-1.14684	-1.22239	-0.523562	0.862496	FALSE	TRUE	FALSE	FALSE	FALSE	FALSE
YAL047C	NA	2.80735	NA	0	NA	NA	FALSE	FALSE	FALSE	FALSE	FALSE	FALSE
YAL046C	2.32193	-0.584963	1	NA	NA	NA	FALSE	FALSE	FALSE	FALSE	FALSE	FALSE
YAL044W-A	NA	1	2.32193	1.58496	3	NA	FALSE	FALSE	FALSE	FALSE	FALSE	FALSE
YAL044C	0.222392	1.80735	2.58496	1.58496	2.32193	2.45943	FALSE	FALSE	FALSE	FALSE	FALSE	FALSE
YAL043C	0.807355	1.22239	1	2.70044	-0.222392	2.48543	FALSE	FALSE	FALSE	FALSE	FALSE	FALSE
YAL042W	2.32193	4.08746	2.16993	NA	3	2	FALSE	FALSE	FALSE	FALSE	FALSE	FALSE
YAL041W	NA	2.32193	NA	NA	NA	2.58496	FALSE	FALSE	FALSE	FALSE	FALSE	FALSE
YAL040C	0.273018	0.568843	0	0.758992	0.0780025	1.21723	TRUE	TRUE	TRUE	TRUE	TRUE	TRUE
YAL039C	2.11548	2.85798	0.459432	2	1.926	1.58496	FALSE	FALSE	FALSE	FALSE	FALSE	FALSE
YAL038W	1.58496	2.58496	1.58496	NA	NA	2.80735	FALSE	FALSE	FALSE	FALSE	FALSE	FALSE
YAL037C-A	NA	NA	NA	NA	NA	NA	FALSE	FALSE	FALSE	FALSE	FALSE	FALSE
YAL037W	-0.736966	-1	-0.263034	0	1	0.584963	FALSE	FALSE	FALSE	FALSE	FALSE	FALSE
YAL036C	0.927068	0.607683	1.96683	1.58496	1.19438	1.33342	TRUE	TRUE	TRUE	FALSE	TRUE	TRUE
YAL035W	1.37851	1.73697	2.45943	2	NA	2.58496	FALSE	FALSE	FALSE	FALSE	FALSE	FALSE
YAL034W-A	NA	1	NA	NA	NA	0	FALSE	FALSE	FALSE	FALSE	FALSE	FALSE
YAL034C	3	2.79307	1.89308	2.77961	1.44746	2.95174	FALSE	TRUE	FALSE	FALSE	FALSE	FALSE
YAL033W	NA	NA	NA	NA	NA	NA	FALSE	FALSE	FALSE	FALSE	FALSE	FALSE
YAL032C	0.584963	NA	0	NA	0	0	FALSE	FALSE	FALSE	FALSE	FALSE	FALSE
YAL031C	-0.289507	0	0.736966	0.321928	0.263034	0.0995357	FALSE	TRUE	FALSE	FALSE	FALSE	TRUE
YAL030W	0.222392	-1.37851	1.926	0.584963	0.584963	2	FALSE	FALSE	FALSE	FALSE	FALSE	FALSE
YAL030W	NA	NA	NA	NA	NA	NA	FALSE	FALSE	FALSE	FALSE	FALSE	FALSE
YAL029C	-0.29956	0.321928	-0.678072	1	0.192645	NA	FALSE	FALSE	FALSE	FALSE	FALSE	FALSE
YAL028W	NA	NA	NA	NA	NA	NA	FALSE	FALSE	FALSE	FALSE	FALSE	FALSE
YAL027W	NA	NA	NA	NA	1.73697	NA	FALSE	FALSE	FALSE	FALSE	FALSE	FALSE
YAL026C	-0.194816	0.619728	0.0780025	0.106915	-0.442943	-0.444785	TRUE	TRUE	TRUE	TRUE	TRUE	TRUE
YAL025C	1.21299	0.807355	1.29546	1.5025	0.816554	1	TRUE	FALSE	TRUE	FALSE	TRUE	FALSE
YAL024C	0.893085	3.16993	2.80735	NA	2.16993	NA	FALSE	FALSE	FALSE	FALSE	FALSE	FALSE
YAL023C	0.887525	0.270089	0.807355	0.400538	0.739685	0.321928	TRUE	TRUE	TRUE	TRUE	TRUE	TRUE
YAL022C	NA	NA	2	NA	NA	NA	FALSE	FALSE	FALSE	FALSE	FALSE	FALSE
YAL021C	2.03953	2.82312	2.15325	2.75002	1.74024	1.88897	TRUE	FALSE	TRUE	FALSE	TRUE	TRUE
YAL020C	NA	NA	NA	NA	2	0	FALSE	FALSE	FALSE	FALSE	FALSE	FALSE
YAL019W	2.32193	NA	1	NA	0	NA	FALSE	FALSE	FALSE	FALSE	FALSE	FALSE
YAL018C	NA	NA	NA	NA	NA	NA	FALSE	FALSE	FALSE	FALSE	FALSE	FALSE
YAL017W	NA	2	NA	NA	NA	3.16993	FALSE	FALSE	FALSE	FALSE	FALSE	FALSE
YAL016W	NA	NA	NA	NA	NA	NA	FALSE	FALSE	FALSE	FALSE	FALSE	FALSE
YAL015C	2.848	5.55459	2.77259	3.52356	2.848	3.75489	FALSE	FALSE	FALSE	FALSE	FALSE	FALSE
YAL014C	2.80735	1.32193	0.263034	0	-0.321928	0	FALSE	FALSE	FALSE	FALSE	FALSE	FALSE
YAL013W	2.53605	4.58496	2.70044	1.22239	2.11548	3.32193	FALSE	FALSE	FALSE	FALSE	FALSE	FALSE
YAL012W	1.51785	2.37851	2.24101	4.24793	2.76939	3.67243	TRUE	FALSE	FALSE	FALSE	FALSE	FALSE
YAL011W	0.736966	1.80735	2.32193	2.32193	0.415037	3	FALSE	FALSE	FALSE	FALSE	FALSE	FALSE
YAL010C	1.22239	1.22239	1.32193	2.32193	0.263034	0	FALSE	FALSE	FALSE	FALSE	FALSE	FALSE
YAL009W	0	1.48543	NA	NA	1.80735	1	FALSE	FALSE	FALSE	FALSE	FALSE	FALSE
YAL008W	1.80735	1.32193	-1	0.736966	1.32193	1.32193	FALSE	FALSE	FALSE	FALSE	FALSE	FALSE
YAL007C	4.39232	0	NA	NA	3.75489	NA	FALSE	FALSE	FALSE	FALSE	FALSE	FALSE
YAL005C	1	0.20482	0.0995357	0.283793	0.263034	0.521953	FALSE	TRUE	FALSE	TRUE	FALSE	TRUE
YAL003W	1.09311	1.21068	1.62599	1.60164	1.30757	1.32016	TRUE	TRUE	TRUE	TRUE	TRUE	TRUE
YAL003W	NA	NA	NA	NA	NA	NA	FALSE	FALSE	FALSE	FALSE	FALSE	FALSE
YAL002W	NA	6.04439	NA	NA	NA	NA	FALSE	FALSE	FALSE	FALSE	FALSE	FALSE
YAL001C	-0.415037	0.415037	0	0	0.847997	0.584963	FALSE	FALSE	FALSE	FALSE	FALSE	FALSE
YAL001C	NA	NA	NA	NA	NA	NA	FALSE	FALSE	FALSE	FALSE	FALSE	FALSE
YAR002W	2	0.415037	NA	1.58496	1.32193	2	FALSE	FALSE	FALSE	FALSE	FALSE	FALSE
YAR002C-A	2.80735	0.584963	1.41504	NA	0	1.32193	FALSE	FALSE	FALSE	FALSE	FALSE	FALSE
YAR003W	-0.514573	1.32193	0	NA	1	2	FALSE	FALSE	FALSE	FALSE	FALSE	FALSE
YAR007C	NA	NA	NA	NA	NA	NA	FALSE	FALSE	FALSE	FALSE	FALSE	FALSE
YAR008W	1.32193	NA	-0.584963	NA	NA	NA	FALSE	FALSE	FALSE	FALSE	FALSE	FALSE
YAR014C	NA	NA	-1.32193	NA	-0.415037	0	FALSE	FALSE	FALSE	FALSE	FALSE	FALSE
YAR015W	0	2	1.73697	2.32193	0.485427	NA	FALSE	FALSE	FALSE	FALSE	FALSE	FALSE
YAR018C	1.58496	NA	3	NA	1.58496	NA	FALSE	FALSE	FALSE	FALSE	FALSE	FALSE
YAR019C	NA	NA	0	0	NA	1	FALSE	FALSE	FALSE	FALSE	FALSE	FALSE
YAR020C	NA	NA	0	2.32193	1.58496	2.32193	FALSE	FALSE	FALSE	FALSE	FALSE	FALSE
YAR023C	NA	NA	NA	NA	2	NA	FALSE	FALSE	FALSE	FALSE	FALSE	FALSE
YAR027W	1.54432	1.71049	1.26303	1.36257	1.09311	2.08746	FALSE	FALSE	FALSE	FALSE	FALSE	FALSE
YAR028W	0.137504	2	0.584963	0	0.584963	0	FALSE	FALSE	FALSE	FALSE	FALSE	FALSE
YAR029W	-0.152003	0.115477	0.584963	-1.11548	-1.70044	-0.106915	FALSE	FALSE	FALSE	FALSE	FALSE	FALSE
YAR031W	3.1964	6.1819	2.65535	5	2.79355	4.90087	FALSE	FALSE	FALSE	FALSE	FALSE	FALSE
YAR033W	2.22239	2.22239	1.28011	2	0.788496	2.08746	FALSE	FALSE	FALSE	FALSE	FALSE	FALSE
YAR035W	1.58496	NA	1	NA	1	NA	FALSE	FALSE	FALSE	FALSE	FALSE	FALSE
YAR035C-A	NA	NA	NA	NA	NA	NA	FALSE	FALSE	FALSE	FALSE	FALSE	FALSE
YAR042W	0.152003	0.706269	0.509014	1.24101	-0.176878	0.641546	TRUE	FALSE	TRUE	FALSE	TRUE	TRUE
YAR050W	NA	NA	NA	NA	NA	NA	FALSE	FALSE	FALSE	FALSE	FALSE	FALSE
YAR064W	NA	NA	NA	NA	NA	NA	FALSE	FALSE	FALSE	FALSE	FALSE	FALSE
YAR066W	0	NA	0	NA	NA	NA	FALSE	FALSE	FALSE	FALSE	FALSE	FALSE
YAR068W	NA	NA	NA	NA	NA	NA	FALSE	FALSE	FALSE	FALSE	FALSE	FALSE
YAR071W	NA	NA	NA	NA	NA	NA	FALSE	FALSE	FALSE	FALSE	FALSE	FALSE
YBL113C	NA	NA	NA	NA	NA	NA	FALSE	FALSE	FALSE	FALSE	FALSE	FALSE
YBL112C	1.76553	1.27009	1.10309	0.63743	1.09622	0.83399	FALSE	FALSE	TRUE	FALSE	TRUE	TRUE
YBL111C	-0.777608	-1.41504	-1.23704	-0.137504	-1.54749	-0.917538	FALSE	FALSE	FALSE	FALSE	FALSE	FALSE
YBL111C	NA	NA	NA	NA	NA	NA	FALSE	FALSE	FALSE	FALSE	FALSE	FALSE
YBL108C-A	NA	NA	NA	NA	NA	NA	FALSE	FALSE	FALSE	FALSE	FALSE	FALSE
YBL107C	0.263034	3.32193	-0.415037	NA	0	-0.263034	FALSE	FALSE	FALSE	FALSE	FALSE	FALSE
YBL106C	3.70044	NA	NA	NA	NA	NA	FALSE	FALSE	FALSE	FALSE	FALSE	FALSE
YBL105C	1.24793	1.45943	2.32193	1	1.36257	2.24793	FALSE	FALSE	FALSE	FALSE	FALSE	FALSE
YBL104C	NA	NA	NA	NA	NA	NA	FALSE	FALSE	FALSE	FALSE	FALSE	FALSE
YBL103C	-0.843274	-0.881356	-2.16993	0	-0.691878	0.275634	TRUE	FALSE	FALSE	FALSE	TRUE	FALSE
YBL102W	0.956931	0.169925	1.19265	0.36257	0.0780025	0.736966	FALSE	FALSE	FALSE	FALSE	FALSE	FALSE
YBL101C	1.75002	2.71425	2.66297	3.12928	2	3.04439	FALSE	FALSE	FALSE	FALSE	FALSE	FALSE
YBL100W-C	NA	NA	NA	NA	NA	NA	FALSE	FALSE	FALSE	FALSE	FALSE	FALSE
YBL099W	-0.340491	-0.466021	-0.463947	0.0230836	-1.01902	-0.35967	TRUE	TRUE	TRUE	TRUE	TRUE	TRUE
YBL098W	NA	NA	NA	NA	NA	NA	FALSE	FALSE	FALSE	FALSE	FALSE	FALSE
YBL097W	1.45943	1.54057	1.90689	2.73697	2.41504	1.19265	FALSE	FALSE	FALSE	FALSE	FALSE	FALSE
YBL095W	1.58496	2.58496	NA	NA	1.58496	2.58496	FALSE	FALSE	FALSE	FALSE	FALSE	FALSE
YBL093C	2.90689	2.37197	1.75489	2.12928	2.71989	1.56188	TRUE	FALSE	TRUE	FALSE	FALSE	TRUE
YBL092W	5.04439	NA	5	NA	3.49185	4.70044	FALSE	FALSE	FALSE	FALSE	FALSE	FALSE
YBL091C-A	1.51457	0.283793	1	0.273018	1.848	0.321928	FALSE	TRUE	FALSE	TRUE	FALSE	TRUE
YBL091C-A	NA	NA	NA	NA	NA	NA	FALSE	FALSE	FALSE	FALSE	FALSE	FALSE
YBL091C	0.321928	1.58496	2.70044	NA	-0.736966	3.39232	FALSE	FALSE	FALSE	FALSE	FALSE	FALSE
YBL090W	NA	NA	1	NA	NA	2.80735	FALSE	FALSE	FALSE	FALSE	FALSE	FALSE
YBL089W	-1	-2.32193	-1.58496	NA	0	NA	FALSE	FALSE	FALSE	FALSE	FALSE	FALSE
YBL088C	NA	1.58496	1	NA	NA	0	FALSE	FALSE	FALSE	FALSE	FALSE	FALSE
YBL087C	1.30039	1.31194	0.876265	0.321928	1.1676	1.23349	TRUE	TRUE	TRUE	TRUE	TRUE	TRUE
YBL087C	NA	NA	NA	NA	NA	NA	FALSE	FALSE	FALSE	FALSE	FALSE	FALSE
YBL086C	NA	NA	NA	NA	NA	2.58496	FALSE	FALSE	FALSE	FALSE	FALSE	FALSE
YBL085W	1.22239	3	2	NA	1.32193	NA	FALSE	FALSE	FALSE	FALSE	FALSE	FALSE
YBL084C	NA	NA	NA	NA	NA	NA	FALSE	FALSE	FALSE	FALSE	FALSE	FALSE
YBL082C	2.32193	NA	1.58496	NA	1	NA	FALSE	FALSE	FALSE	FALSE	FALSE	FALSE
YBL081W	2.80735	2.16993	3	0.736966	2.48543	2	FALSE	FALSE	FALSE	FALSE	FALSE	FALSE
YBL080C	1.73697	0.736966	0	0	-0.415037	1	FALSE	FALSE	FALSE	FALSE	FALSE	FALSE
YBL079W	3.05889	2.58496	2.70044	NA	2.75489	1.66297	FALSE	FALSE	FALSE	FALSE	FALSE	FALSE
YBL078C	-2.06609	-0.640104	-1.94753	0.405992	-1.45372	-0.540568	FALSE	TRUE	FALSE	TRUE	TRUE	TRUE
YBL076C	2.80735	2	NA	1	-0.736966	1	FALSE	FALSE	FALSE	FALSE	FALSE	FALSE
YBL075C	1	3	NA	NA	NA	0	FALSE	FALSE	FALSE	FALSE	FALSE	FALSE
YBL074C	1.32193	1.08746	1.45943	2.16993	3.32193	0.584963	FALSE	FALSE	FALSE	FALSE	FALSE	FALSE
YBL072C	3.16993	NA	0.415037	1.32193	2	1	FALSE	FALSE	FALSE	FALSE	FALSE	FALSE
YBL071C-B	-6.80618	-7.05528	-5.16189	-6.29155	-5.24422	-5.62936	FALSE	FALSE	TRUE	FALSE	TRUE	TRUE
YBL071W-A	-0.97728	-2	-1.18442	-2.32193	-1.16636	-3.32193	TRUE	FALSE	TRUE	FALSE	TRUE	FALSE
YBL069W	2.41504	3.80735	2.63227	3.58496	3.05889	2.58496	FALSE	FALSE	FALSE	FALSE	FALSE	FALSE
YBL068W	NA	NA	NA	0	3.16993	NA	FALSE	FALSE	FALSE	FALSE	FALSE	FALSE
YBL067C	0	-0.584963	NA	NA	0.415037	0.415037	FALSE	FALSE	FALSE	FALSE	FALSE	FALSE
YBL066C	0	0.736966	1.41504	1.73697	0.169925	0.628031	FALSE	FALSE	FALSE	FALSE	FALSE	FALSE
YBL064C	NA	1.22239	NA	1.58496	NA	1.32193	FALSE	FALSE	FALSE	FALSE	FALSE	FALSE
YBL063W	1.58496	NA	NA	NA	NA	NA	FALSE	FALSE	FALSE	FALSE	FALSE	FALSE
YBL061C	1	NA	NA	NA	NA	NA	FALSE	FALSE	FALSE	FALSE	FALSE	FALSE
YBL060W	NA	NA	NA	NA	NA	NA	FALSE	FALSE	FALSE	FALSE	FALSE	FALSE
YBL059C-A	1.53605	3.03562	4.29768	2.1375	2.97728	3.80735	FALSE	FALSE	FALSE	FALSE	FALSE	FALSE
YBL059C-A	NA	NA	NA	NA	NA	NA	FALSE	FALSE	FALSE	FALSE	FALSE	FALSE
YBL059W	1.06413	1.32193	2.75489	1.58496	2.078	1.44057	FALSE	FALSE	FALSE	FALSE	FALSE	FALSE
YBL059W	NA	NA	NA	NA	NA	NA	FALSE	FALSE	FALSE	FALSE	FALSE	FALSE
YBL058W	1.63005	1.66297	0.641546	2.09954	0.241008	1.07276	TRUE	TRUE	TRUE	FALSE	TRUE	TRUE
YBL057C	NA	0	NA	NA	NA	NA	FALSE	FALSE	FALSE	FALSE	FALSE	FALSE
YBL056W	-0.169925	-0.599462	-0.678072	0.584963	-1.0614	-0.814444	TRUE	TRUE	TRUE	FALSE	TRUE	TRUE
YBL055C	1.67807	3.70044	3.80735	1.80735	2.58496	2.90689	FALSE	FALSE	FALSE	FALSE	FALSE	FALSE
YBL054W	3.67807	2	2.54432	1.45943	1.2854	1.73697	FALSE	FALSE	FALSE	FALSE	FALSE	FALSE
YBL052C	NA	NA	NA	NA	NA	NA	FALSE	FALSE	FALSE	FALSE	FALSE	FALSE
YBL051C	1.70782	1.78241	1.28011	1.42626	1.24998	1.40881	TRUE	TRUE	TRUE	FALSE	TRUE	TRUE
YBL050W	2.32193	1.88753	1.8625	2.16993	1.1375	1.14684	FALSE	FALSE	FALSE	FALSE	FALSE	FALSE
YBL050W	NA	NA	NA	NA	NA	NA	FALSE	FALSE	FALSE	FALSE	FALSE	FALSE
YBL049W	2	NA	1.58496	1.32193	-0.584963	NA	FALSE	FALSE	FALSE	FALSE	FALSE	FALSE
YBL047C	0.222392	1.58496	1.22239	1.58496	-0.415037	1.48543	FALSE	FALSE	FALSE	FALSE	FALSE	FALSE
YBL046W	3.08746	3.16993	3.90689	1.32193	0.415037	4.24793	FALSE	FALSE	FALSE	FALSE	FALSE	FALSE
YBL045C	-0.47242	0.124927	-0.430351	0.315502	-0.0729794	0.510962	TRUE	TRUE	TRUE	TRUE	TRUE	TRUE
YBL044W	NA	NA	NA	NA	NA	NA	FALSE	FALSE	FALSE	FALSE	FALSE	FALSE
YBL043W	NA	0	NA	NA	-2	NA	FALSE	FALSE	FALSE	FALSE	FALSE	FALSE
YBL042C	2.93289	3.39232	1.96347	2.07039	2.60486	3.41504	FALSE	FALSE	FALSE	FALSE	FALSE	FALSE
YBL041W	5.26679	5.90689	4.39232	NA	4.07325	5.27612	FALSE	FALSE	FALSE	FALSE	FALSE	FALSE
YBL040C	1.8365	3.16993	3.10434	3.70044	2.974	2.22239	FALSE	FALSE	FALSE	FALSE	FALSE	FALSE
YBL040C	NA	NA	NA	NA	NA	NA	FALSE	FALSE	FALSE	FALSE	FALSE	FALSE
YBL039W-B	2.32193	NA	NA	1.58496	NA	2.32193	FALSE	FALSE	FALSE	FALSE	FALSE	FALSE
YBL039C	1.11548	NA	0	NA	0.678072	0.584963	FALSE	FALSE	FALSE	FALSE	FALSE	FALSE
YBL038W	2.58496	3.32193	2	NA	2	NA	FALSE	FALSE	FALSE	FALSE	FALSE	FALSE
YBL037W	2.80735	3.32193	NA	NA	NA	1.22239	FALSE	FALSE	FALSE	FALSE	FALSE	FALSE
YBL036C	0.736966	1.32193	0	-1	-0.321928	3	FALSE	FALSE	FALSE	FALSE	FALSE	FALSE
YBL035C	0.432959	2.45943	2.04439	0.736966	1.62149	1	TRUE	FALSE	FALSE	FALSE	FALSE	FALSE
YBL034C	NA	0	-1	NA	NA	NA	FALSE	FALSE	FALSE	FALSE	FALSE	FALSE
YBL033C	1	1.32193	1	0.584963	NA	1	FALSE	FALSE	FALSE	FALSE	FALSE	FALSE
YBL032W	3.32193	3.59495	3.07039	3.72792	3.3594	3.33092	TRUE	FALSE	FALSE	FALSE	FALSE	FALSE
YBL031W	NA	NA	NA	NA	NA	0	FALSE	FALSE	FALSE	FALSE	FALSE	FALSE
YBL030C	0.106915	0.447459	0.863938	1.06228	0	0.485427	TRUE	TRUE	TRUE	TRUE	TRUE	TRUE
YBL029C-A	0.906891	2.02554	0.0931094	1.87447	0.5025	1.56071	FALSE	TRUE	FALSE	FALSE	FALSE	TRUE
YBL029W	4.64386	3.80735	NA	NA	1.58496	NA	FALSE	FALSE	FALSE	FALSE	FALSE	FALSE
YBL028C	1.6845	0.387023	0.462972	0.956931	0.896907	0.641546	TRUE	FALSE	TRUE	FALSE	TRUE	TRUE
YBL027W	0.367509	0.605721	0.771376	0.571906	0.966053	0.816136	TRUE	TRUE	TRUE	TRUE	TRUE	TRUE
YBL027W	NA	NA	NA	NA	NA	NA	FALSE	FALSE	FALSE	FALSE	FALSE	FALSE
YBL026W	0.415037	1.70044	2.32193	0.485427	2.64386	2.64386	FALSE	FALSE	FALSE	FALSE	FALSE	FALSE
YBL026W	NA	NA	NA	NA	NA	NA	FALSE	FALSE	FALSE	FALSE	FALSE	FALSE
YBL025W	-0.431339	-0.415037	-0.442005	-0.0506261	-1.28445	-0.573185	TRUE	TRUE	TRUE	TRUE	TRUE	TRUE
YBL024W	3.64386	2	3.90689	2.80735	2.22239	3.70044	FALSE	FALSE	FALSE	FALSE	FALSE	FALSE
YBL023C	0.584963	NA	2.58496	0	NA	NA	FALSE	FALSE	FALSE	FALSE	FALSE	FALSE
YBL022C	NA	NA	NA	NA	NA	3	FALSE	FALSE	FALSE	FALSE	FALSE	FALSE
YBL021C	-0.736966	2.70044	1.58496	NA	2.16993	NA	FALSE	FALSE	FALSE	FALSE	FALSE	FALSE
YBL020W	NA	NA	NA	NA	NA	NA	FALSE	FALSE	FALSE	FALSE	FALSE	FALSE
YBL019W	NA	NA	NA	NA	NA	NA	FALSE	FALSE	FALSE	FALSE	FALSE	FALSE
YBL018C	2.32193	3	2.45943	1	2.5025	0	FALSE	FALSE	FALSE	FALSE	FALSE	FALSE
YBL018C	NA	NA	NA	NA	NA	NA	FALSE	FALSE	FALSE	FALSE	FALSE	FALSE
YBL017C	2	2.73697	0.584963	2	0.106915	-0.241008	FALSE	FALSE	FALSE	FALSE	FALSE	FALSE
YBL016W	3.40599	3.27302	2.26303	2	2.926	3.41504	FALSE	FALSE	FALSE	FALSE	FALSE	FALSE
YBL015W	0.874469	1.08746	1.43296	-0.222392	0.459432	0	FALSE	FALSE	FALSE	FALSE	FALSE	FALSE
YBL014C	2.35755	4.32193	1.58496	0.584963	0.943416	1.36257	FALSE	FALSE	FALSE	FALSE	FALSE	FALSE
YBL013W	0.584963	0.862496	-0.36257	0	-0.152003	-0.0614005	FALSE	FALSE	FALSE	FALSE	FALSE	TRUE
YBL011W	1.65208	1.46949	1.30256	1.85798	1.65535	1.91427	TRUE	TRUE	FALSE	FALSE	TRUE	FALSE
YBL010C	2.13354	2.25873	1.76764	2.4199	1.72154	1.97607	TRUE	TRUE	TRUE	TRUE	TRUE	TRUE
YBL009W	2.90689	NA	1.22239	NA	NA	NA	FALSE	FALSE	FALSE	FALSE	FALSE	FALSE
YBL008W-A	2.45943	0	0	1.58496	1.73697	0.584963	FALSE	FALSE	FALSE	FALSE	FALSE	FALSE
YBL008W	NA	NA	0	NA	NA	NA	FALSE	FALSE	FALSE	FALSE	FALSE	FALSE
YBL007C	3.16993	3.08746	3	1	NA	3.70044	FALSE	FALSE	FALSE	FALSE	FALSE	FALSE
YBL006C	0.225881	0.577545	-0.169925	-0.0848889	-0.347019	0.387023	TRUE	TRUE	TRUE	TRUE	TRUE	TRUE
YBL005W	0.415037	1.43296	0.201634	0	0.50696	1.24101	FALSE	FALSE	TRUE	FALSE	FALSE	FALSE
YBL004W	NA	NA	NA	NA	NA	NA	FALSE	FALSE	FALSE	FALSE	FALSE	FALSE
YBL003C	0.0264722	0.148863	-0.0740006	-0.5025	-0.490986	-0.367732	TRUE	TRUE	TRUE	FALSE	TRUE	TRUE
YBL002W	1.15472	0.736966	1.23133	0.547488	0.841302	0.548621	TRUE	TRUE	TRUE	TRUE	TRUE	TRUE
YBL001C	0.173332	0.790077	0.255257	1.54432	1.40599	0.756074	TRUE	TRUE	TRUE	FALSE	TRUE	TRUE
YBR001C	NA	NA	NA	NA	NA	0	FALSE	FALSE	FALSE	FALSE	FALSE	FALSE
YBR002C	1.70782	1.47393	1.72583	2	1.2854	1.078	FALSE	FALSE	FALSE	FALSE	FALSE	FALSE
YBR003W	0.584963	0.36257	1	1.58496	-2	0.584963	FALSE	FALSE	FALSE	FALSE	FALSE	FALSE
YBR004C	1	1.58496	0.847997	-1	1.87447	NA	FALSE	FALSE	FALSE	FALSE	FALSE	FALSE
YBR005W	-0.621488	0.378512	0.25634	0.691878	-0.366782	1	TRUE	TRUE	TRUE	FALSE	TRUE	FALSE
YBR006W	NA	NA	NA	NA	1	NA	FALSE	FALSE	FALSE	FALSE	FALSE	FALSE
YBR007C	0.584963	0.893085	0.584963	1	-0.222392	0.415037	FALSE	FALSE	FALSE	FALSE	FALSE	FALSE
YBR008C	-1	0	NA	NA	NA	NA	FALSE	FALSE	FALSE	FALSE	FALSE	FALSE
YBR009C	1.24591	1.07039	1.36257	1.63743	1.44302	1.29598	TRUE	TRUE	TRUE	TRUE	TRUE	TRUE
YBR010W	3.75077	3.08092	2.70044	4.20945	2.96683	2.38702	FALSE	FALSE	FALSE	FALSE	FALSE	FALSE
YBR011C	1	-0.36257	NA	-1.80735	-1.32193	-1.73697	FALSE	FALSE	FALSE	FALSE	FALSE	FALSE
YBR013C	NA	0	1	NA	NA	1	FALSE	FALSE	FALSE	FALSE	FALSE	FALSE
YBR014C	0.684498	1.12102	0.95109	1.36923	1.19931	0.459432	TRUE	TRUE	FALSE	FALSE	TRUE	TRUE
YBR015C	1.5025	0.459432	1.45943	NA	0.652077	0.70044	FALSE	FALSE	FALSE	FALSE	FALSE	FALSE
YBR016W	0.520832	0.773724	0.167457	0.0641303	0.620152	0.632268	TRUE	TRUE	TRUE	TRUE	TRUE	TRUE
YBR017C	-0.192645	-0.514573	0.415037	-0.584963	0	-1.58496	FALSE	FALSE	FALSE	FALSE	FALSE	FALSE
YBR018C	NA	NA	NA	0	NA	NA	FALSE	FALSE	FALSE	FALSE	FALSE	FALSE
YBR019C	NA	NA	NA	NA	NA	NA	FALSE	FALSE	FALSE	FALSE	FALSE	FALSE
YBR020W	NA	NA	NA	NA	NA	NA	FALSE	FALSE	FALSE	FALSE	FALSE	FALSE
YBR021W	0.415037	0	NA	0	NA	1.32193	FALSE	FALSE	FALSE	FALSE	FALSE	FALSE
YBR022W	3.11548	3.45943	2.58496	3.08746	3	2.48543	FALSE	FALSE	FALSE	FALSE	FALSE	FALSE
YBR023C	NA	NA	0.584963	NA	2.32193	NA	FALSE	FALSE	FALSE	FALSE	FALSE	FALSE
YBR024W	0.438884	0.828729	0.17897	0.485427	0.457207	1.14439	TRUE	TRUE	TRUE	TRUE	TRUE	TRUE
YBR025C	1.06343	1.50614	1.34338	1.38187	1.20043	1.19322	TRUE	TRUE	TRUE	TRUE	TRUE	TRUE
YBR026C	0.584963	0.289507	-2	1.58496	0	-1.45943	FALSE	FALSE	FALSE	FALSE	FALSE	FALSE
YBR028C	2.32193	0.678072	0	NA	1.80735	0	FALSE	FALSE	FALSE	FALSE	FALSE	FALSE
YBR029C	NA	2.58496	1	NA	1.87447	1.58496	FALSE	FALSE	FALSE	FALSE	FALSE	FALSE
YBR030W	NA	NA	NA	NA	0	NA	FALSE	FALSE	FALSE	FALSE	FALSE	FALSE
YBR031W	3	NA	3	1.58496	NA	NA	FALSE	FALSE	FALSE	FALSE	FALSE	FALSE
YBR033W	NA	1.58496	1.32193	NA	NA	1.58496	FALSE	FALSE	FALSE	FALSE	FALSE	FALSE
YBR034C	3.67807	NA	4.08746	NA	3.36923	2.58496	FALSE	FALSE	FALSE	FALSE	FALSE	FALSE
YBR035C	NA	4	1.58496	NA	1.58496	2.80735	FALSE	FALSE	FALSE	FALSE	FALSE	FALSE
YBR036C	1.16993	1	1.37851	1	1.32193	2	FALSE	FALSE	FALSE	FALSE	FALSE	FALSE
YBR037C	NA	NA	NA	NA	NA	NA	FALSE	FALSE	FALSE	FALSE	FALSE	FALSE
YBR038W	1.58496	1.58496	2.16993	NA	-2	0	FALSE	FALSE	FALSE	FALSE	FALSE	FALSE
YBR039W	2.32193	1.58496	1	1	0	2.08746	FALSE	FALSE	FALSE	FALSE	FALSE	FALSE
YBR040W	NA	NA	NA	NA	NA	NA	FALSE	FALSE	FALSE	FALSE	FALSE	FALSE
YBR041W	NA	NA	NA	NA	NA	NA	FALSE	FALSE	FALSE	FALSE	FALSE	FALSE
YBR042C	NA	NA	NA	NA	NA	NA	FALSE	FALSE	FALSE	FALSE	FALSE	FALSE
YBR043C	-0.389042	0	-0.237039	-0.70044	-1.36923	0.643856	TRUE	TRUE	TRUE	FALSE	TRUE	FALSE
YBR044C	NA	NA	NA	NA	NA	1.58496	FALSE	FALSE	FALSE	FALSE	FALSE	FALSE
YBR045C	NA	1.58496	NA	1	NA	NA	FALSE	FALSE	FALSE	FALSE	FALSE	FALSE
YBR046C	0	1.1375	0	-1.32193	NA	0.485427	FALSE	FALSE	FALSE	FALSE	FALSE	FALSE
YBR047W	NA	NA	NA	NA	NA	NA	FALSE	FALSE	FALSE	FALSE	FALSE	FALSE
YBR048W	-0.103407	0.875027	0.128855	1.04182	-0.284881	1.16672	TRUE	TRUE	TRUE	TRUE	TRUE	TRUE
YBR048W	NA	NA	NA	NA	NA	NA	FALSE	FALSE	FALSE	FALSE	FALSE	FALSE
YBR049C	0.395929	0.736966	0.714598	-0.133267	0.470891	0.273018	TRUE	TRUE	TRUE	TRUE	TRUE	TRUE
YBR050C	NA	NA	NA	NA	NA	NA	FALSE	FALSE	FALSE	FALSE	FALSE	FALSE
YBR052C	1.58496	NA	0.584963	0.736966	1.32193	2.16993	FALSE	FALSE	FALSE	FALSE	FALSE	FALSE
YBR053C	0.459432	1.60204	NA	1.36257	1.58496	2.29546	FALSE	TRUE	FALSE	FALSE	FALSE	FALSE
YBR054W	0.545434	1.49476	0.584963	0.981853	0.459432	1.02237	TRUE	TRUE	TRUE	TRUE	TRUE	TRUE
YBR055C	NA	NA	NA	NA	NA	NA	FALSE	FALSE	FALSE	FALSE	FALSE	FALSE
YBR056W	2.58496	2.32193	NA	1	NA	0.807355	FALSE	FALSE	FALSE	FALSE	FALSE	FALSE
YBR057C	2.80735	2.70044	0.415037	NA	NA	2.16993	FALSE	FALSE	FALSE	FALSE	FALSE	FALSE
YBR058C	2.32193	3.32193	1.22239	NA	1.926	2.70044	FALSE	FALSE	FALSE	FALSE	FALSE	FALSE
YBR058C-A	0.754888	0.0995357	1.16993	0.137504	0.186413	-1.10692	FALSE	TRUE	FALSE	FALSE	TRUE	FALSE
YBR059C	1.16993	1.90046	1.52356	2.78427	1.06012	2.34915	TRUE	TRUE	TRUE	FALSE	TRUE	TRUE
YBR060C	NA	NA	NA	NA	NA	NA	FALSE	FALSE	FALSE	FALSE	FALSE	FALSE
YBR061C	3.08746	3	NA	2.80735	1.48543	2.11548	FALSE	FALSE	FALSE	FALSE	FALSE	FALSE
YBR062C	0.0931094	2.07039	0.662965	1.848	0.658963	1.70044	FALSE	FALSE	FALSE	FALSE	FALSE	FALSE
YBR062C	NA	NA	NA	NA	NA	NA	FALSE	FALSE	FALSE	FALSE	FALSE	FALSE
YBR063C	-1.32193	-1	NA	NA	0	-0.415037	FALSE	FALSE	FALSE	FALSE	FALSE	FALSE
YBR065C	-1.48543	-0.192645	-0.415037	0	-1.58496	1.26303	FALSE	FALSE	FALSE	FALSE	FALSE	FALSE
YBR066C	3.97728	4.08746	5.52356	4.04439	3.48543	3.42626	FALSE	FALSE	FALSE	FALSE	FALSE	FALSE
YBR067C	3.9542	2.9542	4.24793	NA	3.45943	NA	FALSE	FALSE	FALSE	FALSE	FALSE	FALSE
YBR068C	-0.530829	0.299014	-0.566185	0.0132968	-0.604618	0	TRUE	TRUE	TRUE	TRUE	TRUE	TRUE
YBR069C	-0.356144	1.23133	0.0848889	1.22239	0.0703893	1.47131	TRUE	TRUE	TRUE	FALSE	TRUE	TRUE
YBR070C	NA	NA	NA	NA	NA	NA	FALSE	FALSE	FALSE	FALSE	FALSE	FALSE
YBR071W	0.938599	1.74723	1.25154	1.73697	0.620411	1.46949	TRUE	FALSE	TRUE	FALSE	TRUE	FALSE
YBR072W	NA	2.90689	2.45943	4	4.24793	NA	FALSE	FALSE	FALSE	FALSE	FALSE	FALSE
YBR072C-A	NA	NA	NA	NA	NA	NA	FALSE	FALSE	FALSE	FALSE	FALSE	FALSE
YBR073W	2.16993	0	-1	NA	0.222392	1	FALSE	FALSE	FALSE	FALSE	FALSE	FALSE
YBR074W	NA	NA	NA	NA	0	NA	FALSE	FALSE	FALSE	FALSE	FALSE	FALSE
YBR076W	0	NA	-2.58496	-2	-2.16993	-0.584963	FALSE	FALSE	FALSE	FALSE	FALSE	FALSE
YBR077C	0.39079	0.462343	0.321928	1.27302	0.422233	1.30933	TRUE	TRUE	TRUE	FALSE	TRUE	TRUE
YBR078W	1.71444	0.736966	1.44184	0.356144	1.1302	0.938599	TRUE	TRUE	TRUE	TRUE	TRUE	TRUE
YBR078W	NA	NA	NA	NA	NA	NA	FALSE	FALSE	FALSE	FALSE	FALSE	FALSE
YBR079C	NA	2.5025	NA	NA	5.12928	NA	FALSE	FALSE	FALSE	FALSE	FALSE	FALSE
YBR080C	1.22239	2	0.222392	1.41504	NA	1.80735	FALSE	FALSE	FALSE	FALSE	FALSE	FALSE
YBR081C	1.58496	0	2.58496	1.58496	1	1.58496	FALSE	FALSE	FALSE	FALSE	FALSE	FALSE
YBR082C	1.58208	1.40145	1.65208	1.61143	1.34832	1.45089	TRUE	TRUE	TRUE	TRUE	TRUE	TRUE
YBR082C	NA	NA	NA	NA	NA	NA	FALSE	FALSE	FALSE	FALSE	FALSE	FALSE
YBR083W	NA	2.80735	NA	NA	3.16993	NA	FALSE	FALSE	FALSE	FALSE	FALSE	FALSE
YBR084W	2.23704	3	1.848	2.58496	1.52356	0.678072	FALSE	FALSE	FALSE	FALSE	FALSE	FALSE
YBR084C-A	0.21546	-0.0541074	0.264795	0.255257	0.48078	0.201634	TRUE	TRUE	TRUE	TRUE	TRUE	TRUE
YBR084C-A	NA	NA	NA	NA	NA	NA	FALSE	FALSE	FALSE	FALSE	FALSE	FALSE
YBR085W	NA	NA	NA	NA	NA	NA	FALSE	FALSE	FALSE	FALSE	FALSE	FALSE
YBR085C-A	-0.225783	0.830335	-0.0521962	0.536289	-0.0183785	0.451648	TRUE	TRUE	TRUE	TRUE	TRUE	TRUE
YBR086C	NA	2.80735	NA	NA	-1.58496	2.58496	FALSE	FALSE	FALSE	FALSE	FALSE	FALSE
YBR087W	NA	NA	NA	1	NA	NA	FALSE	FALSE	FALSE	FALSE	FALSE	FALSE
YBR088C	NA	NA	NA	NA	NA	NA	FALSE	FALSE	FALSE	FALSE	FALSE	FALSE
YBR089C-A	-0.750022	-0.125531	-0.398549	-1.37851	0.0614005	0.938599	TRUE	FALSE	TRUE	FALSE	TRUE	FALSE
YBR090C	-0.953457	-1.86507	-0.532221	-1.08746	-0.934905	-0.724366	TRUE	TRUE	TRUE	TRUE	TRUE	TRUE
YBR090C	NA	NA	NA	NA	NA	NA	FALSE	FALSE	FALSE	FALSE	FALSE	FALSE
YBR091C	0	1	NA	NA	1	0	FALSE	FALSE	FALSE	FALSE	FALSE	FALSE
YBR092C	3.32193	NA	3.52356	NA	4.70044	3.16993	FALSE	FALSE	FALSE	FALSE	FALSE	FALSE
YBR093C	NA	NA	NA	NA	NA	NA	FALSE	FALSE	FALSE	FALSE	FALSE	FALSE
YBR094W	2.58496	NA	NA	NA	NA	2.32193	FALSE	FALSE	FALSE	FALSE	FALSE	FALSE
YBR095C	0.807355	1	1	NA	NA	2.32193	FALSE	FALSE	FALSE	FALSE	FALSE	FALSE
YBR096W	2.32193	NA	NA	1	1	1	FALSE	FALSE	FALSE	FALSE	FALSE	FALSE
YBR097W	NA	NA	NA	NA	NA	-1	FALSE	FALSE	FALSE	FALSE	FALSE	FALSE
YBR098W	0.736966	2.80735	0.415037	-0.584963	-0.807355	2.58496	FALSE	FALSE	FALSE	FALSE	FALSE	FALSE
YBR101C	NA	1.87447	1.73697	NA	NA	NA	FALSE	FALSE	FALSE	FALSE	FALSE	FALSE
YBR102C	-1.45943	0.736966	-0.584963	-1	-1.32193	-0.584963	FALSE	FALSE	FALSE	FALSE	FALSE	FALSE
YBR103W	NA	NA	NA	NA	NA	NA	FALSE	FALSE	FALSE	FALSE	FALSE	FALSE
YBR104W	0.678072	1	0	NA	0	NA	FALSE	FALSE	FALSE	FALSE	FALSE	FALSE
YBR105C	0.719892	-0.209453	0.378512	-0.263034	0.628031	0.736966	FALSE	TRUE	FALSE	FALSE	FALSE	FALSE
YBR106W	2.48543	2.67807	2.88753	1.76553	1.42884	1.37851	FALSE	FALSE	FALSE	FALSE	FALSE	FALSE
YBR107C	-0.350907	-0.36257	-0.932886	0.214125	-1.90689	-1.34792	TRUE	TRUE	TRUE	TRUE	TRUE	TRUE
YBR108W	NA	1.1375	0.736966	1.58496	1.58496	2.32193	FALSE	FALSE	FALSE	FALSE	FALSE	FALSE
YBR109C	3.15754	2.37551	2.35279	3.18322	2.87235	2.17383	TRUE	TRUE	TRUE	FALSE	TRUE	TRUE
YBR110W	2.32193	1.80735	2	NA	3.24793	2.80735	FALSE	FALSE	FALSE	FALSE	FALSE	FALSE
YBR111C	NA	0.321928	-1.80735	0.807355	-1	0.169925	FALSE	FALSE	FALSE	FALSE	FALSE	FALSE
YBR111W-A	-0.0554951	-0.226276	0.222392	1.14439	0.190103	0.391191	TRUE	TRUE	TRUE	FALSE	TRUE	TRUE
YBR111W-A	NA	NA	NA	NA	NA	NA	FALSE	FALSE	FALSE	FALSE	FALSE	FALSE
YBR111W-A	NA	NA	NA	NA	NA	NA	FALSE	FALSE	FALSE	FALSE	FALSE	FALSE
YBR112C	5.45943	5.04439	4.75489	NA	3.08746	4.24793	FALSE	FALSE	FALSE	FALSE	FALSE	FALSE
YBR114W	NA	1.22239	0	NA	NA	3.45943	FALSE	FALSE	FALSE	FALSE	FALSE	FALSE
YBR115C	1.58496	NA	0	NA	1.32193	NA	FALSE	FALSE	FALSE	FALSE	FALSE	FALSE
YBR117C	2	1.03395	0	1.39232	-2	0.774933	FALSE	TRUE	FALSE	FALSE	FALSE	TRUE
YBR118W	3.52356	0	1.45943	1.32193	2	0.807355	FALSE	FALSE	FALSE	FALSE	FALSE	FALSE
YBR119W	2.66297	1.50901	3	1.94753	2.92057	4.12928	FALSE	FALSE	FALSE	FALSE	FALSE	FALSE
YBR119W	NA	NA	NA	NA	NA	NA	FALSE	FALSE	FALSE	FALSE	FALSE	FALSE
YBR120C	NA	NA	0	NA	NA	NA	FALSE	FALSE	FALSE	FALSE	FALSE	FALSE
YBR121C	0.874469	0.652077	1	NA	1.41504	2.70044	FALSE	FALSE	FALSE	FALSE	FALSE	FALSE
YBR122C	0.0365259	0.0703893	0.567041	1.074	-0.584963	-0.0331669	TRUE	TRUE	TRUE	FALSE	TRUE	TRUE
YBR123C	1	3	1.41504	2.32193	1.41504	3.80735	FALSE	FALSE	FALSE	FALSE	FALSE	FALSE
YBR125C	2.53605	2.53051	0.943416	3.32193	1.53051	2.12928	FALSE	FALSE	FALSE	FALSE	FALSE	FALSE
YBR126C	1.43531	1.10766	1.64689	1.16314	1.48176	1.04211	TRUE	TRUE	TRUE	TRUE	TRUE	TRUE
YBR127C	1.78136	1.75673	1.56937	1.66626	1.92338	1.88136	TRUE	TRUE	TRUE	TRUE	TRUE	FALSE
YBR128C	NA	1.58496	NA	NA	NA	1.58496	FALSE	FALSE	FALSE	FALSE	FALSE	FALSE
YBR129C	NA	0.584963	NA	NA	NA	NA	FALSE	FALSE	FALSE	FALSE	FALSE	FALSE
YBR130C	1.22239	0.263034	NA	-1	0	1.58496	FALSE	FALSE	FALSE	FALSE	FALSE	FALSE
YBR131W	2.74723	4.04439	1.67807	1.26303	2.848	2.70044	FALSE	FALSE	FALSE	FALSE	FALSE	FALSE
YBR132C	0.0347654	0.426815	0.0840643	0.570316	-0.137504	0.479168	TRUE	TRUE	TRUE	TRUE	TRUE	TRUE
YBR133C	0	0	2.80735	NA	0.192645	1.58496	FALSE	FALSE	FALSE	FALSE	FALSE	FALSE
YBR135W	1.37851	1.89308	2.23266	0.847997	1.03747	1.42884	FALSE	FALSE	FALSE	FALSE	FALSE	FALSE
YBR136W	2.20163	3.08746	3	-0.736966	2.45943	-0.263034	FALSE	FALSE	FALSE	FALSE	FALSE	FALSE
YBR137W	1.1375	1.152	1.76553	0.530515	0.222392	0.765535	FALSE	FALSE	FALSE	FALSE	FALSE	FALSE
YBR138C	0	0	0	NA	NA	-1	FALSE	FALSE	FALSE	FALSE	FALSE	FALSE
YBR139W	2.24793	2.16993	1.44057	2.45943	1.68806	1.83007	FALSE	FALSE	FALSE	FALSE	FALSE	FALSE
YBR140C	NA	NA	NA	NA	0	NA	FALSE	FALSE	FALSE	FALSE	FALSE	FALSE
YBR141C	2.80735	NA	NA	NA	0	NA	FALSE	FALSE	FALSE	FALSE	FALSE	FALSE
YBR142W	0.584963	0.415037	1.1375	-0.678072	1.58496	1.09954	FALSE	FALSE	FALSE	FALSE	FALSE	FALSE
YBR143C	1.05445	0.621488	0.523562	1.58496	0.612977	1.53605	FALSE	FALSE	FALSE	FALSE	FALSE	FALSE
YBR145W	NA	NA	NA	NA	NA	NA	FALSE	FALSE	FALSE	FALSE	FALSE	FALSE
YBR146W	1.98351	1.75439	1.79163	1.34915	1.6567	0.896907	TRUE	TRUE	TRUE	TRUE	TRUE	TRUE
YBR147W	0	1.36257	1	2.22239	2.32193	2	FALSE	FALSE	FALSE	FALSE	FALSE	FALSE
YBR148W	NA	NA	NA	NA	NA	NA	FALSE	FALSE	FALSE	FALSE	FALSE	FALSE
YBR149W	2.5025	0	-0.222392	0.584963	1.41504	0.807355	FALSE	TRUE	FALSE	FALSE	FALSE	FALSE
YBR150C	NA	NA	NA	NA	NA	NA	FALSE	FALSE	FALSE	FALSE	FALSE	FALSE
YBR151W	0.847997	1.66297	2.32193	NA	2.80735	2.22239	FALSE	FALSE	FALSE	FALSE	FALSE	FALSE
YBR152W	0.605721	1.38702	-0.222392	0.862496	0.378512	1.53605	TRUE	FALSE	FALSE	FALSE	TRUE	FALSE
YBR153W	1.22239	1	1	2.32193	NA	2	FALSE	FALSE	FALSE	FALSE	FALSE	FALSE
YBR154C	2.90689	2	2.80735	NA	2.32193	3	FALSE	FALSE	FALSE	FALSE	FALSE	FALSE
YBR155W	0.29956	-0.263034	0.459432	0.169925	0.234465	-1.22239	TRUE	FALSE	TRUE	FALSE	TRUE	FALSE
YBR156C	4.29768	4.45943	3.83289	2.88753	3.78136	5.72792	FALSE	FALSE	FALSE	FALSE	FALSE	FALSE
YBR157C	NA	NA	NA	NA	NA	NA	FALSE	FALSE	FALSE	FALSE	FALSE	FALSE
YBR158W	3.79385	4.88753	4.43741	3.90689	3.77897	3.25376	TRUE	FALSE	FALSE	FALSE	TRUE	FALSE
YBR159W	2.11548	3.80735	NA	2	3	3.32193	FALSE	FALSE	FALSE	FALSE	FALSE	FALSE
YBR160W	NA	-1	NA	NA	0	2.32193	FALSE	FALSE	FALSE	FALSE	FALSE	FALSE
YBR161W	2	2	2	NA	1	2	FALSE	FALSE	FALSE	FALSE	FALSE	FALSE
YBR162C	-0.341616	-0.0565835	-0.46828	0.359081	-0.819037	-0.0493277	TRUE	TRUE	TRUE	TRUE	TRUE	TRUE
YBR162W-A	-0.402098	-0.378512	-0.415037	-1.73697	-0.819428	-0.485427	TRUE	FALSE	FALSE	FALSE	FALSE	FALSE
YBR163W	0.874469	1.45943	NA	NA	0.321928	1.32193	FALSE	FALSE	FALSE	FALSE	FALSE	FALSE
YBR164C	3.32193	2.41504	NA	NA	NA	0.874469	FALSE	FALSE	FALSE	FALSE	FALSE	FALSE
YBR165W	NA	NA	4.64386	2.90689	3.90689	NA	FALSE	FALSE	FALSE	FALSE	FALSE	FALSE
YBR166C	NA	1.22239	2.32193	NA	NA	2	FALSE	FALSE	FALSE	FALSE	FALSE	FALSE
YBR167C	NA	NA	NA	NA	NA	NA	FALSE	FALSE	FALSE	FALSE	FALSE	FALSE
YBR168W	2.80735	3.70044	NA	NA	2.58496	NA	FALSE	FALSE	FALSE	FALSE	FALSE	FALSE
YBR169C	-0.119299	1.47573	0.388565	0.520832	-0.331206	0.67319	TRUE	TRUE	TRUE	TRUE	TRUE	TRUE
YBR170C	2.01495	1.83494	1.72935	2.92057	1.84435	2.16993	TRUE	TRUE	FALSE	FALSE	TRUE	FALSE
YBR171W	3.32193	3.32193	NA	NA	3.32193	NA	FALSE	FALSE	FALSE	FALSE	FALSE	FALSE
YBR172C	4.16993	NA	NA	NA	5.61471	NA	FALSE	FALSE	FALSE	FALSE	FALSE	FALSE
YBR173C	1.63227	1.22239	1.58496	1.37851	2.27302	2.58496	FALSE	FALSE	FALSE	FALSE	FALSE	FALSE
YBR175W	1.58496	1.22239	1.16993	1.32193	3	3.45943	FALSE	FALSE	FALSE	FALSE	FALSE	FALSE
YBR176W	0	2.32193	1.32193	NA	1.58496	-0.321928	FALSE	FALSE	FALSE	FALSE	FALSE	FALSE
YBR177C	1.23879	2.05889	1.54432	4.2854	1.4361	1.63227	TRUE	FALSE	FALSE	FALSE	FALSE	TRUE
YBR179C	NA	NA	NA	NA	NA	NA	FALSE	FALSE	FALSE	FALSE	FALSE	FALSE
YBR180W	-1	NA	NA	NA	NA	NA	FALSE	FALSE	FALSE	FALSE	FALSE	FALSE
YBR181C	2.59223	2.71989	2.62205	2.83007	2.43035	2.83954	TRUE	FALSE	TRUE	FALSE	TRUE	FALSE
YBR181C	NA	NA	NA	NA	NA	NA	FALSE	FALSE	FALSE	FALSE	FALSE	FALSE
YBR182C	-0.966833	-0.530515	-1.12776	-0.793549	-0.523562	0.241008	TRUE	FALSE	TRUE	FALSE	TRUE	FALSE
YBR182C-A	NA	NA	NA	NA	NA	NA	FALSE	FALSE	FALSE	FALSE	FALSE	FALSE
YBR183W	NA	NA	NA	NA	NA	NA	FALSE	FALSE	FALSE	FALSE	FALSE	FALSE
YBR184W	NA	NA	NA	NA	NA	NA	FALSE	FALSE	FALSE	FALSE	FALSE	FALSE
YBR185C	0	0.584963	0.807355	0	1.58496	1.22239	FALSE	FALSE	FALSE	FALSE	FALSE	FALSE
YBR186W	NA	-1	0	NA	NA	NA	FALSE	FALSE	FALSE	FALSE	FALSE	FALSE
YBR186W	NA	NA	NA	NA	NA	NA	FALSE	FALSE	FALSE	FALSE	FALSE	FALSE
YBR187W	-0.321928	-1	-1.16993	1.58496	-2.22239	0.736966	FALSE	FALSE	FALSE	FALSE	FALSE	FALSE
YBR188C	-0.947533	-1	-1.32193	2.58496	-1.18442	-2.20163	FALSE	FALSE	FALSE	FALSE	FALSE	FALSE
YBR189W	2.53087	2.76578	2.7426	3.47756	2.8191	3.52356	TRUE	TRUE	TRUE	TRUE	TRUE	TRUE
YBR189W	NA	NA	NA	NA	NA	NA	FALSE	FALSE	FALSE	FALSE	FALSE	FALSE
YBR191W	1.848	1.8314	2.04809	1.92057	1.7137	1.58496	TRUE	TRUE	TRUE	TRUE	TRUE	TRUE
YBR191W	NA	NA	NA	NA	NA	NA	FALSE	FALSE	FALSE	FALSE	FALSE	FALSE
YBR192W	2.80735	2.22239	1.8365	2.41504	2.80735	2.23266	FALSE	FALSE	FALSE	FALSE	FALSE	FALSE
YBR193C	-1.22239	-0.436099	-0.378512	-0.830075	-0.862496	0.70044	FALSE	FALSE	FALSE	FALSE	FALSE	FALSE
YBR194W	-0.584963	-0.415037	-0.584963	2	1.32193	0	FALSE	FALSE	FALSE	FALSE	FALSE	FALSE
YBR195C	NA	NA	NA	NA	NA	NA	FALSE	FALSE	FALSE	FALSE	FALSE	FALSE
YBR196C	-1.26303	-1.26303	-1.16993	-0.321928	-1.58496	-1.73697	FALSE	FALSE	FALSE	FALSE	FALSE	FALSE
YBR196C-A	NA	-1	0.584963	NA	-2.32193	0.584963	FALSE	FALSE	FALSE	FALSE	FALSE	FALSE
YBR196C-B	-0.736966	NA	NA	NA	NA	-1	FALSE	FALSE	FALSE	FALSE	FALSE	FALSE
YBR197C	-0.0874628	0.206451	-0.514573	-0.106915	-0.556393	0.485427	FALSE	FALSE	FALSE	FALSE	FALSE	FALSE
YBR198C	3.90689	3.70044	1.80735	NA	2.70044	2	FALSE	FALSE	FALSE	FALSE	FALSE	FALSE
YBR199W	2.8314	2.926	2.92057	3.75489	2.89482	3.24286	FALSE	TRUE	FALSE	FALSE	FALSE	FALSE
YBR200W	-0.472068	-0.49304	-0.565597	-0.321928	-0.289507	-0.289507	TRUE	TRUE	TRUE	TRUE	TRUE	TRUE
YBR200W-A	NA	NA	NA	NA	NA	NA	FALSE	FALSE	FALSE	FALSE	FALSE	FALSE
YBR201W	1.26303	1.078	0	2	-1	0.263034	FALSE	FALSE	FALSE	FALSE	FALSE	FALSE
YBR201C-A	NA	NA	NA	NA	NA	NA	FALSE	FALSE	FALSE	FALSE	FALSE	FALSE
YBR202W	0.405992	-0.234465	0.215729	2.58496	0.222392	0.387023	TRUE	FALSE	TRUE	FALSE	TRUE	FALSE
YBR203W	1.58496	NA	-2	0	0	-0.415037	FALSE	FALSE	FALSE	FALSE	FALSE	FALSE
YBR204C	1.73697	1.09954	0.415037	NA	1.58496	3.32193	FALSE	FALSE	FALSE	FALSE	FALSE	FALSE
YBR205W	1.77529	2.53605	1.79355	5	2.24793	2.24101	TRUE	FALSE	FALSE	FALSE	TRUE	FALSE
YBR207W	4.80735	4.39232	3	NA	2.26303	NA	FALSE	FALSE	FALSE	FALSE	FALSE	FALSE
YBR208C	NA	NA	1.58496	NA	1	0	FALSE	FALSE	FALSE	FALSE	FALSE	FALSE
YBR210W	0	-0.415037	1.32193	0	-0.222392	-0.678072	FALSE	FALSE	FALSE	FALSE	FALSE	FALSE
YBR211C	NA	NA	NA	NA	NA	NA	FALSE	FALSE	FALSE	FALSE	FALSE	FALSE
YBR212W	1.22239	1.61471	1	2.24793	2.4021	2.05445	FALSE	FALSE	FALSE	FALSE	FALSE	FALSE
YBR213W	-0.847997	-1.58496	-0.415037	1.58496	NA	NA	FALSE	FALSE	FALSE	FALSE	FALSE	FALSE
YBR214W	2	4.08746	3	NA	NA	3.04439	FALSE	FALSE	FALSE	FALSE	FALSE	FALSE
YBR215W	2.63227	2.85798	2.9542	4.32193	2.45943	1.63743	FALSE	FALSE	FALSE	FALSE	FALSE	FALSE
YBR215W	NA	NA	NA	NA	NA	NA	FALSE	FALSE	FALSE	FALSE	FALSE	FALSE
YBR216C	-1.58496	-1.80735	-1	NA	0.415037	0	FALSE	FALSE	FALSE	FALSE	FALSE	FALSE
YBR217W	-1.43296	-0.662965	-1.35755	-2.16993	-1.45251	-0.201634	TRUE	TRUE	FALSE	FALSE	FALSE	TRUE
YBR218C	2.70044	3.58496	NA	NA	2.80735	NA	FALSE	FALSE	FALSE	FALSE	FALSE	FALSE
YBR219C	2.16993	-0.247928	1.68806	0.906891	0	0.180572	FALSE	FALSE	FALSE	FALSE	FALSE	FALSE
YBR219C	NA	NA	NA	NA	NA	NA	FALSE	FALSE	FALSE	FALSE	FALSE	FALSE
YBR220C	0.807355	-0.29956	0.63743	-0.584963	-0.584963	-0.459432	FALSE	FALSE	FALSE	FALSE	FALSE	FALSE
YBR221C	1.32193	1	1.22239	1.926	1.54432	0.765535	FALSE	FALSE	FALSE	FALSE	FALSE	FALSE
YBR221W-A	NA	NA	NA	NA	NA	NA	FALSE	FALSE	FALSE	FALSE	FALSE	FALSE
YBR222C	3.20163	3.29768	3.58496	3	2.90689	5.78136	FALSE	FALSE	FALSE	FALSE	FALSE	FALSE
YBR223C	0.415037	-0.5025	-0.415037	0.415037	-0.678072	0.807355	FALSE	FALSE	FALSE	FALSE	FALSE	FALSE
YBR225W	-0.263034	-0.152003	2.90689	1.32193	0.678072	-0.152003	FALSE	FALSE	FALSE	FALSE	FALSE	FALSE
YBR227C	NA	NA	NA	NA	-1	NA	FALSE	FALSE	FALSE	FALSE	FALSE	FALSE
YBR228W	1.58496	NA	1	NA	1	NA	FALSE	FALSE	FALSE	FALSE	FALSE	FALSE
YBR229C	0.247928	1.14886	0.603341	1.76939	0.956931	1.24393	TRUE	TRUE	TRUE	TRUE	TRUE	TRUE
YBR230C	1.64909	1.919	2.08342	2.09622	2.5502	2.21723	TRUE	TRUE	TRUE	TRUE	TRUE	TRUE
YBR230C	NA	NA	NA	NA	NA	NA	FALSE	FALSE	FALSE	FALSE	FALSE	FALSE
YBR230W-A	1	2.80735	NA	0	1.58496	2.32193	FALSE	FALSE	FALSE	FALSE	FALSE	FALSE
YBR231C	NA	0	NA	0	NA	NA	FALSE	FALSE	FALSE	FALSE	FALSE	FALSE
YBR233W	2.80735	3.62449	3.16993	3.85798	3.87447	3.80735	FALSE	FALSE	FALSE	FALSE	FALSE	FALSE
YBR233W-A	-0.29956	0	-0.169925	NA	-0.807355	-1.80735	FALSE	FALSE	FALSE	FALSE	FALSE	FALSE
YBR234C	NA	NA	NA	NA	NA	NA	FALSE	FALSE	FALSE	FALSE	FALSE	FALSE
YBR235W	0.807355	0	3	NA	2	2.45943	FALSE	FALSE	FALSE	FALSE	FALSE	FALSE
YBR236C	3.12928	2.36923	5	NA	3.62449	3.70044	FALSE	FALSE	FALSE	FALSE	FALSE	FALSE
YBR237W	NA	NA	NA	NA	NA	NA	FALSE	FALSE	FALSE	FALSE	FALSE	FALSE
YBR238C	-0.432959	-1.73697	-0.415037	-1.32193	0.0874628	-0.263034	TRUE	FALSE	FALSE	FALSE	FALSE	FALSE
YBR239C	2	NA	2	NA	2	NA	FALSE	FALSE	FALSE	FALSE	FALSE	FALSE
YBR240C	2	1.58496	-0.321928	-1	-1.16993	1.58496	FALSE	FALSE	FALSE	FALSE	FALSE	FALSE
YBR241C	NA	2.58496	NA	NA	NA	1.58496	FALSE	FALSE	FALSE	FALSE	FALSE	FALSE
YBR242W	1	1	NA	NA	0.415037	NA	FALSE	FALSE	FALSE	FALSE	FALSE	FALSE
YBR243C	-0.387023	-0.447459	-1.08746	-0.530515	-0.662965	-0.415037	TRUE	FALSE	FALSE	FALSE	TRUE	TRUE
YBR244W	1	0.736966	2.32193	0.584963	1	0	FALSE	FALSE	FALSE	FALSE	FALSE	FALSE
YBR245C	2.07039	NA	3.45943	1.58496	3.32193	4.39232	FALSE	FALSE	FALSE	FALSE	FALSE	FALSE
YBR246W	NA	NA	NA	NA	NA	0	FALSE	FALSE	FALSE	FALSE	FALSE	FALSE
YBR247C	2.45943	1	0.485427	1.58496	0.678072	NA	FALSE	FALSE	FALSE	FALSE	FALSE	FALSE
YBR248C	2.24793	NA	2.58496	1.58496	-0.263034	2.32193	FALSE	FALSE	FALSE	FALSE	FALSE	FALSE
YBR249C	4.45943	3.9542	NA	2.32193	3.66297	3.70044	FALSE	FALSE	FALSE	FALSE	FALSE	FALSE
YBR250W	NA	NA	NA	NA	NA	NA	FALSE	FALSE	FALSE	FALSE	FALSE	FALSE
YBR251W	NA	3.12928	2.90689	3	5.12928	NA	FALSE	FALSE	FALSE	FALSE	FALSE	FALSE
YBR252W	NA	NA	NA	NA	4.52356	3.16993	FALSE	FALSE	FALSE	FALSE	FALSE	FALSE
YBR253W	NA	2.32193	0.263034	2.80735	2.80735	4.24793	FALSE	FALSE	FALSE	FALSE	FALSE	FALSE
YBR254C	1.27563	0.192645	0.91427	2.05889	0.693897	0.253757	FALSE	TRUE	TRUE	FALSE	TRUE	TRUE
YBR255W	1	1.80735	1.87447	0.736966	0.485427	3	FALSE	FALSE	FALSE	FALSE	FALSE	FALSE
YBR255C-A	1.22239	0.321928	2.32193	0.807355	1.11548	-1	FALSE	FALSE	FALSE	FALSE	FALSE	FALSE
YBR255C-A	NA	NA	NA	NA	NA	NA	FALSE	FALSE	FALSE	FALSE	FALSE	FALSE
YBR256C	NA	NA	NA	NA	NA	1.58496	FALSE	FALSE	FALSE	FALSE	FALSE	FALSE
YBR257W	0.152003	0.415037	-0.36257	-0.807355	-0.514573	-0.485427	FALSE	FALSE	FALSE	FALSE	FALSE	FALSE
YBR258C	2.58496	2	0.415037	3.58496	1.45943	1.44057	FALSE	FALSE	FALSE	FALSE	FALSE	FALSE
YBR259W	-2.32193	-1	-0.584963	-0.584963	0.584963	1.58496	FALSE	FALSE	FALSE	FALSE	FALSE	FALSE
YBR260C	NA	NA	NA	NA	-0.584963	0	FALSE	FALSE	FALSE	FALSE	FALSE	FALSE
YBR261C	2	3.80735	1.32193	1.58496	3.80735	3	FALSE	FALSE	FALSE	FALSE	FALSE	FALSE
YBR262C	NA	2.32193	1.32193	NA	1	2	FALSE	FALSE	FALSE	FALSE	FALSE	FALSE
YBR263W	1.32193	NA	NA	NA	0.415037	NA	FALSE	FALSE	FALSE	FALSE	FALSE	FALSE
YBR264C	0.584963	NA	1.58496	NA	NA	0.321928	FALSE	FALSE	FALSE	FALSE	FALSE	FALSE
YBR265W	1.05445	2.22239	1.52356	1.58496	1.10692	3	FALSE	FALSE	FALSE	FALSE	FALSE	FALSE
YBR267W	2.51658	1.58496	3	1.73697	1.97575	2.32193	FALSE	FALSE	FALSE	FALSE	FALSE	FALSE
YBR268W	0	NA	1	NA	1	2	FALSE	FALSE	FALSE	FALSE	FALSE	FALSE
YBR269C	NA	3.58496	NA	NA	5.20945	3.08746	FALSE	FALSE	FALSE	FALSE	FALSE	FALSE
YBR270C	NA	NA	NA	NA	NA	1	FALSE	FALSE	FALSE	FALSE	FALSE	FALSE
YBR271W	1.32193	2.58496	1.87447	0	3.58496	2	FALSE	FALSE	FALSE	FALSE	FALSE	FALSE
YBR272C	-1.70044	-1.58496	-2	-2.22239	-4.45943	-2	FALSE	FALSE	FALSE	FALSE	FALSE	FALSE
YBR273C	NA	NA	NA	NA	NA	NA	FALSE	FALSE	FALSE	FALSE	FALSE	FALSE
YBR274W	1.58496	0.823122	-0.906891	-2.22239	-2.07039	0.807355	FALSE	FALSE	FALSE	FALSE	FALSE	FALSE
YBR275C	1.65208	3.32193	2.58496	3	1.22239	-0.415037	FALSE	FALSE	FALSE	FALSE	FALSE	FALSE
YBR276C	NA	NA	NA	NA	NA	NA	FALSE	FALSE	FALSE	FALSE	FALSE	FALSE
YBR278W	0.584963	0.321928	0	NA	-1	1	FALSE	FALSE	FALSE	FALSE	FALSE	FALSE
YBR279W	0.629632	1.05445	0.371969	1	0.0227201	0.802963	TRUE	TRUE	TRUE	TRUE	TRUE	TRUE
YBR280C	-1	0	-1	NA	0	NA	FALSE	FALSE	FALSE	FALSE	FALSE	FALSE
YBR281C	NA	NA	NA	NA	NA	NA	FALSE	FALSE	FALSE	FALSE	FALSE	FALSE
YBR282W	NA	NA	NA	NA	NA	NA	FALSE	FALSE	FALSE	FALSE	FALSE	FALSE
YBR283C	-0.469485	0	-0.432959	0.347923	-0.0801703	-0.459432	TRUE	TRUE	TRUE	FALSE	TRUE	TRUE
YBR284W	2.80735	3.44057	1.58496	5.16993	2.43296	2.53051	FALSE	FALSE	FALSE	FALSE	FALSE	FALSE
YBR285W	NA	NA	NA	NA	NA	NA	FALSE	FALSE	FALSE	FALSE	FALSE	FALSE
YBR286W	NA	4.16993	NA	2	3.32193	2.32193	FALSE	FALSE	FALSE	FALSE	FALSE	FALSE
YBR287W	NA	1.73697	0.736966	0.415037	-0.584963	1	FALSE	FALSE	FALSE	FALSE	FALSE	FALSE
YBR288C	NA	NA	NA	NA	NA	0	FALSE	FALSE	FALSE	FALSE	FALSE	FALSE
YBR289W	NA	NA	NA	NA	NA	0	FALSE	FALSE	FALSE	FALSE	FALSE	FALSE
YBR290W	0.447459	1.47393	0.540568	2.41504	0.452512	0.716207	TRUE	FALSE	FALSE	FALSE	FALSE	FALSE
YBR291C	0	NA	NA	NA	NA	1	FALSE	FALSE	FALSE	FALSE	FALSE	FALSE
YBR293W	1.76553	0.321928	1.16993	3.32193	0.222392	1.32193	FALSE	FALSE	FALSE	FALSE	FALSE	FALSE
YBR294W	0.584963	0.584963	0	NA	2	0.415037	FALSE	FALSE	FALSE	FALSE	FALSE	FALSE
YBR295W	NA	NA	0	NA	0	1	FALSE	FALSE	FALSE	FALSE	FALSE	FALSE
YBR296C	NA	NA	NA	NA	NA	NA	FALSE	FALSE	FALSE	FALSE	FALSE	FALSE
YBR296C-A	NA	NA	NA	NA	NA	NA	FALSE	FALSE	FALSE	FALSE	FALSE	FALSE
YBR297W	-0.415037	0.777608	1.80735	2.87447	1.73697	0.874469	FALSE	FALSE	FALSE	FALSE	FALSE	FALSE
YBR298C	NA	NA	NA	NA	NA	NA	FALSE	FALSE	FALSE	FALSE	FALSE	FALSE
YBR298C-A	NA	NA	NA	NA	NA	NA	FALSE	FALSE	FALSE	FALSE	FALSE	FALSE
YBR299W	NA	NA	NA	NA	NA	NA	FALSE	FALSE	FALSE	FALSE	FALSE	FALSE
YBR301W	NA	NA	NA	NA	NA	NA	FALSE	FALSE	FALSE	FALSE	FALSE	FALSE
YBR302C	NA	NA	0	NA	NA	0	FALSE	FALSE	FALSE	FALSE	FALSE	FALSE
YCL073C	NA	-1.58496	NA	-1	-3	NA	FALSE	FALSE	FALSE	FALSE	FALSE	FALSE
YCL069W	NA	NA	NA	NA	NA	NA	FALSE	FALSE	FALSE	FALSE	FALSE	FALSE
YCL068C	NA	NA	NA	NA	NA	NA	FALSE	FALSE	FALSE	FALSE	FALSE	FALSE
YCL067C	NA	NA	NA	NA	NA	NA	FALSE	FALSE	FALSE	FALSE	FALSE	FALSE
YCL066W	NA	NA	NA	NA	NA	0	FALSE	FALSE	FALSE	FALSE	FALSE	FALSE
YCL064C	2	NA	2.32193	-1	NA	-1	FALSE	FALSE	FALSE	FALSE	FALSE	FALSE
YCL063W	3.58496	NA	1.58496	1	0	NA	FALSE	FALSE	FALSE	FALSE	FALSE	FALSE
YCL061C	1.41504	0.584963	2.58496	1.32193	3.45943	0	FALSE	FALSE	FALSE	FALSE	FALSE	FALSE
YCL059C	2.02748	2.73697	3.42626	1.152	2.03562	1.75899	TRUE	FALSE	FALSE	FALSE	TRUE	FALSE
YCL058C	NA	NA	NA	NA	NA	NA	FALSE	FALSE	FALSE	FALSE	FALSE	FALSE
YCL058W-A	NA	NA	NA	NA	NA	NA	FALSE	FALSE	FALSE	FALSE	FALSE	FALSE
YCL057C-A	1.58496	0.540568	2.07039	1	0.387023	1.58496	FALSE	FALSE	FALSE	FALSE	FALSE	FALSE
YCL057W	1.34395	3.20945	1.52356	NA	1.27302	1.94753	FALSE	FALSE	FALSE	FALSE	FALSE	FALSE
YCL056C	NA	NA	NA	NA	NA	NA	FALSE	FALSE	FALSE	FALSE	FALSE	FALSE
YCL055W	2	NA	NA	NA	NA	2.32193	FALSE	FALSE	FALSE	FALSE	FALSE	FALSE
YCL054W	1.20163	-1.22239	NA	NA	1.58496	0	FALSE	FALSE	FALSE	FALSE	FALSE	FALSE
YCL052C	NA	1.58496	NA	NA	NA	2.32193	FALSE	FALSE	FALSE	FALSE	FALSE	FALSE
YCL051W	NA	2.16993	-1	0	NA	1.58496	FALSE	FALSE	FALSE	FALSE	FALSE	FALSE
YCL050C	NA	NA	NA	NA	NA	NA	FALSE	FALSE	FALSE	FALSE	FALSE	FALSE
YCL049C	-0.807355	0	-0.736966	-1.58496	-0.652077	0.263034	FALSE	FALSE	FALSE	FALSE	FALSE	FALSE
YCL048W-A	NA	0	0	NA	NA	NA	FALSE	FALSE	FALSE	FALSE	FALSE	FALSE
YCL048W	NA	NA	NA	NA	NA	NA	FALSE	FALSE	FALSE	FALSE	FALSE	FALSE
YCL047C	0	NA	NA	NA	NA	NA	FALSE	FALSE	FALSE	FALSE	FALSE	FALSE
YCL045C	NA	NA	NA	NA	1	-1	FALSE	FALSE	FALSE	FALSE	FALSE	FALSE
YCL044C	2.22239	2.37851	1	1.32193	2	2.32193	FALSE	FALSE	FALSE	FALSE	FALSE	FALSE
YCL043C	NA	NA	NA	NA	2.32193	NA	FALSE	FALSE	FALSE	FALSE	FALSE	FALSE
YCL042W	0.296982	0.40018	0.974909	0.194503	0.762961	0.00991547	TRUE	TRUE	TRUE	TRUE	TRUE	TRUE
YCL040W	0.807355	1.88004	1.88753	1.95936	0.36257	1.80145	FALSE	TRUE	FALSE	FALSE	TRUE	TRUE
YCL039W	NA	NA	2.16993	NA	NA	3.36923	FALSE	FALSE	FALSE	FALSE	FALSE	FALSE
YCL038C	0	NA	NA	NA	0	1	FALSE	FALSE	FALSE	FALSE	FALSE	FALSE
YCL037C	-0.355762	-0.652077	-0.654503	-1.28379	-0.471306	-0.232173	TRUE	TRUE	TRUE	TRUE	TRUE	TRUE
YCL036W	NA	NA	NA	NA	NA	NA	FALSE	FALSE	FALSE	FALSE	FALSE	FALSE
YCL035C	0.415037	2.43296	0.736966	1.41504	0	1.848	FALSE	FALSE	FALSE	FALSE	FALSE	FALSE
YCL034W	NA	NA	NA	NA	NA	NA	FALSE	FALSE	FALSE	FALSE	FALSE	FALSE
YCL033C	NA	NA	NA	NA	0	NA	FALSE	FALSE	FALSE	FALSE	FALSE	FALSE
YCL032W	1.45943	2.70044	1.37851	NA	2.58496	2.80735	FALSE	FALSE	FALSE	FALSE	FALSE	FALSE
YCL031C	3.60666	3	2.74416	2.80735	3.58496	4.47573	FALSE	FALSE	FALSE	FALSE	FALSE	FALSE
YCL030C	3.32193	NA	NA	NA	NA	NA	FALSE	FALSE	FALSE	FALSE	FALSE	FALSE
YCL029C	0.671377	1	1.848	-0.485427	0.716207	0.628031	TRUE	FALSE	FALSE	FALSE	FALSE	FALSE
YCL028W	0	2	NA	NA	NA	NA	FALSE	FALSE	FALSE	FALSE	FALSE	FALSE
YCL027W	NA	NA	NA	1	NA	NA	FALSE	FALSE	FALSE	FALSE	FALSE	FALSE
YCL026C-B	NA	NA	NA	NA	NA	NA	FALSE	FALSE	FALSE	FALSE	FALSE	FALSE
YCL026C-A	NA	NA	NA	NA	NA	NA	FALSE	FALSE	FALSE	FALSE	FALSE	FALSE
YCL025C	NA	NA	NA	NA	NA	NA	FALSE	FALSE	FALSE	FALSE	FALSE	FALSE
YCL024W	NA	NA	NA	NA	NA	NA	FALSE	FALSE	FALSE	FALSE	FALSE	FALSE
YCL021W-A	1	NA	NA	NA	0	NA	FALSE	FALSE	FALSE	FALSE	FALSE	FALSE
YCL018W	NA	NA	NA	NA	NA	NA	FALSE	FALSE	FALSE	FALSE	FALSE	FALSE
YCL017C	-1.37851	-0.378512	-1.70044	1.37851	-1.22239	0.222392	FALSE	FALSE	FALSE	FALSE	FALSE	FALSE
YCL016C	2.20945	2.5025	2	2.58496	1.89812	2.44057	FALSE	FALSE	FALSE	FALSE	FALSE	FALSE
YCL014W	NA	NA	NA	NA	1.58496	NA	FALSE	FALSE	FALSE	FALSE	FALSE	FALSE
YCL012C	0	0.222392	0.36257	1	1.45943	1.45943	FALSE	FALSE	FALSE	FALSE	FALSE	FALSE
YCL012C	NA	NA	NA	NA	NA	NA	FALSE	FALSE	FALSE	FALSE	FALSE	FALSE
YCL011C	1	3.32193	-1.41504	NA	0.807355	2.70044	FALSE	FALSE	FALSE	FALSE	FALSE	FALSE
YCL010C	-0.452512	0.447459	-0.169925	1.41504	-0.263034	-0.584963	FALSE	FALSE	FALSE	FALSE	FALSE	FALSE
YCL009C	2.58496	3.32193	1.80735	1.22239	1.926	3.39232	FALSE	FALSE	FALSE	FALSE	FALSE	FALSE
YCL008C	2.87447	2.37851	3.08746	2.45943	2.5025	3.16993	FALSE	FALSE	FALSE	FALSE	FALSE	FALSE
YCL005W-A	-0.0681715	-0.0324215	-0.0489096	0.547488	0.323838	0.332899	TRUE	TRUE	TRUE	TRUE	TRUE	TRUE
YCL005W-A	NA	NA	NA	NA	NA	NA	FALSE	FALSE	FALSE	FALSE	FALSE	FALSE
YCL005W-A	NA	NA	NA	NA	NA	NA	FALSE	FALSE	FALSE	FALSE	FALSE	FALSE
YCL005W	2.45943	1.11548	0.321928	NA	0.678072	1.32193	FALSE	FALSE	FALSE	FALSE	FALSE	FALSE
YCL004W	1	0.415037	-0.736966	-2.32193	0.321928	1.22239	FALSE	FALSE	FALSE	FALSE	FALSE	FALSE
YCL002C	2.22239	1.41504	2.32193	2.58496	2.41504	1.45943	FALSE	FALSE	FALSE	FALSE	FALSE	FALSE
YCL002C	NA	NA	NA	NA	NA	NA	FALSE	FALSE	FALSE	FALSE	FALSE	FALSE
YCL001W	NA	NA	NA	NA	NA	NA	FALSE	FALSE	FALSE	FALSE	FALSE	FALSE
YCL001W-A	NA	NA	-1	NA	0	1.58496	FALSE	FALSE	FALSE	FALSE	FALSE	FALSE
YCL001W-B	NA	NA	NA	NA	NA	NA	FALSE	FALSE	FALSE	FALSE	FALSE	FALSE
YCR002C	NA	1	NA	NA	2.58496	2	FALSE	FALSE	FALSE	FALSE	FALSE	FALSE
YCR003W	4.32193	NA	1.58496	NA	NA	3.80735	FALSE	FALSE	FALSE	FALSE	FALSE	FALSE
YCR004C	2.41504	1.926	2.58496	4.08746	NA	3.52356	FALSE	FALSE	FALSE	FALSE	FALSE	FALSE
YCR005C	0.611274	0.699134	0.39402	0.623437	0.76033	1.0217	TRUE	TRUE	TRUE	TRUE	TRUE	TRUE
YCR007C	0.186413	-0.662965	0.31034	1	0.510195	0.146841	TRUE	FALSE	TRUE	FALSE	TRUE	TRUE
YCR008W	-0.180572	0.643856	-0.0995357	-1	-0.5025	0.247928	FALSE	FALSE	FALSE	FALSE	FALSE	FALSE
YCR009C	2.84967	2.05445	2.974	2.8635	2.56478	3.15528	TRUE	TRUE	TRUE	FALSE	TRUE	TRUE
YCR010C	NA	1.80735	-1	NA	0.584963	1.32193	FALSE	FALSE	FALSE	FALSE	FALSE	FALSE
YCR011C	3.45943	2.5025	1.87447	3.11548	3.32193	2.28951	FALSE	FALSE	FALSE	FALSE	FALSE	FALSE
YCR012W	5.32912	5.34239	5.06609	4.84549	3.848	4.38421	FALSE	FALSE	FALSE	FALSE	FALSE	FALSE
YCR014C	NA	NA	NA	NA	NA	NA	FALSE	FALSE	FALSE	FALSE	FALSE	FALSE
YCR015C	-1.07039	-1	-1.24793	0.485427	-0.222392	1.16993	FALSE	FALSE	FALSE	FALSE	FALSE	FALSE
YCR016W	2	NA	-1	1	-1.32193	1	FALSE	FALSE	FALSE	FALSE	FALSE	FALSE
YCR017C	2.80735	0.652077	3.32193	2.80735	0.485427	1.11548	FALSE	FALSE	FALSE	FALSE	FALSE	FALSE
YCR018C	3.70044	2.58496	2.32193	2	2	2.848	FALSE	FALSE	FALSE	FALSE	FALSE	FALSE
YCR019W	NA	NA	NA	NA	NA	NA	FALSE	FALSE	FALSE	FALSE	FALSE	FALSE
YCR020C	NA	NA	NA	NA	NA	NA	FALSE	FALSE	FALSE	FALSE	FALSE	FALSE
YCR020C-A	-0.137504	0.678072	1.1375	0.263034	1.19265	0.70044	FALSE	FALSE	FALSE	FALSE	FALSE	FALSE
YCR020W-B	0.415037	1.87447	-0.0995357	0.736966	1	1.11548	FALSE	FALSE	FALSE	FALSE	FALSE	FALSE
YCR021C	0.754888	2	1	1.19265	0.556393	1.078	FALSE	FALSE	FALSE	FALSE	FALSE	FALSE
YCR023C	1.43741	0.823122	0.807355	0.341037	-0.0430687	0.696608	TRUE	TRUE	TRUE	FALSE	TRUE	TRUE
YCR024C	0.584963	4	2	2.11548	2.39232	3.75489	FALSE	FALSE	FALSE	FALSE	FALSE	FALSE
YCR024C-B	-1	1	NA	-1	0	0	FALSE	FALSE	FALSE	FALSE	FALSE	FALSE
YCR024C-A	0.613645	0.480626	0.29956	0	0.683973	0.17585	TRUE	TRUE	TRUE	TRUE	TRUE	TRUE
YCR026C	-0.321928	0.874469	0.584963	0.584963	0.289507	-0.652077	FALSE	FALSE	FALSE	FALSE	FALSE	FALSE
YCR027C	0.652077	2.80735	0.36257	0.321928	0.485427	1.45943	FALSE	FALSE	FALSE	FALSE	FALSE	FALSE
YCR028C	0.247928	0.652077	-1.26303	1.80735	-1.70044	2.16993	FALSE	FALSE	FALSE	FALSE	FALSE	FALSE
YCR028C-A	1.36257	-0.736966	1	1.80735	0.378512	0.765535	FALSE	FALSE	FALSE	FALSE	FALSE	FALSE
YCR028C-A	NA	NA	NA	NA	NA	NA	FALSE	FALSE	FALSE	FALSE	FALSE	FALSE
YCR030C	1.22239	0	0.321928	1	-0.584963	0.192645	FALSE	FALSE	FALSE	FALSE	FALSE	FALSE
YCR031C	1.04261	1.59579	1.22239	1.71319	1.16121	1.66434	TRUE	TRUE	TRUE	TRUE	TRUE	TRUE
YCR031C	NA	NA	NA	NA	NA	NA	FALSE	FALSE	FALSE	FALSE	FALSE	FALSE
YCR032W	0.777608	1.47393	3.80735	1	1	1.64386	FALSE	FALSE	FALSE	FALSE	FALSE	FALSE
YCR033W	2.152	3.05889	1.70044	1.5025	1.41504	NA	FALSE	FALSE	FALSE	FALSE	FALSE	FALSE
YCR034W	0.530515	3.45943	1	1	0.807355	1.22239	FALSE	FALSE	FALSE	FALSE	FALSE	FALSE
YCR035C	1.87447	0.584963	-0.415037	NA	0.807355	-0.222392	FALSE	FALSE	FALSE	FALSE	FALSE	FALSE
YCR036W	NA	1.58496	1	0	NA	NA	FALSE	FALSE	FALSE	FALSE	FALSE	FALSE
YCR037C	NA	NA	NA	NA	NA	NA	FALSE	FALSE	FALSE	FALSE	FALSE	FALSE
YCR038C	NA	1.32193	NA	NA	NA	NA	FALSE	FALSE	FALSE	FALSE	FALSE	FALSE
YCR039C	4.2854	3.62449	2.16993	3.16993	2.9542	3	FALSE	FALSE	FALSE	FALSE	FALSE	FALSE
YCR040W	NA	NA	NA	NA	NA	0	FALSE	FALSE	FALSE	FALSE	FALSE	FALSE
YCR042C	1.58496	2.08746	0.447459	-1.32193	1.1375	2.07039	FALSE	FALSE	FALSE	FALSE	FALSE	FALSE
YCR043C	2.98706	3.08746	2.79008	3	3.01381	1.46566	FALSE	FALSE	FALSE	FALSE	FALSE	TRUE
YCR044C	NA	NA	NA	NA	NA	NA	FALSE	FALSE	FALSE	FALSE	FALSE	FALSE
YCR045C	NA	NA	NA	NA	NA	NA	FALSE	FALSE	FALSE	FALSE	FALSE	FALSE
YCR046C	0.152003	2.80735	NA	2.32193	0.874469	1.41504	FALSE	FALSE	FALSE	FALSE	FALSE	FALSE
YCR047C	0.364572	0	-0.270089	-0.263034	-0.0227201	0.0931094	TRUE	FALSE	TRUE	FALSE	TRUE	FALSE
YCR048W	-1.32193	1	-2.32193	0	-0.736966	1.58496	FALSE	FALSE	FALSE	FALSE	FALSE	FALSE
YCR050C	NA	NA	NA	NA	NA	NA	FALSE	FALSE	FALSE	FALSE	FALSE	FALSE
[truncated: 5,419 more rows]

## Sheet: OSR_uSvsdS
gene	wt_0_uSvsdS	wt_30_uSvsdS	lsm1_0_uSvsdS	lsm1_30_uSvsdS	pat1_0_uSvsdS	pat1_30_uSvsdS	wt_0_uSvsdS_f	wt_30_uSvsdS_f	lsm1_0_uSvsdS_f	lsm1_30_uSvsdS_f	pat1_0_uSvsdS_f	pat1_30_uSvsdS_f
[truncated: 183 more rows]

[truncated: 3 more sheets: OSR_uSvsddS, OSR_uEvsdE, OSR_genes]
