# Supplementary material for: The Lsm1-7/Pat1 complex binds to stress-activated mRNAs and modulates the response to hyperosmotic shock
Source: PLoS Genet. 2018 Jul 30;14(7):e1007563. doi: 10.1371/journal.pgen.1007563 (PMC6085073; doi:10.1371/journal.pgen.1007563)
Supplement: S4 Dataset — (XLSX) [file pgen.1007563.s019.xlsx]

## Sheet: Fig S1
Fig S1B. Expression of mRNA-MS2L by qPCR, in control conditions (without stress) and after 30 min of 0.6 M KCl. Two different transformants were used (T1 and T2).
	Control				0.6 M KCl, 30 min
mRNA-MS2L	T1	T2	Mean	SD	T1	T2	Mean	SD
GPD1-MS2L	1.03618	4.00495	2.52056	2.09923	98.8389	73.8549	86.3469	17.6664
STL1-MS2L	1.11753	1.4038	1.26066	0.202426	218.795	122.962	170.878	67.764
ASH1-MS2L	93.8351	72.1389	82.987	15.3415	31.8755	35.9752	33.9254	2.89895
HYP2-MS2L	20.5685	35.5957	28.0821	10.6258	30.5195	17.3916	23.9555	9.28281
Fig S1C. Time course expression of STL1-MS2L and GPD1-MS2L mRNA levels under osmotic stress.
		LOG2 relative levels of STL1-MS2L mRNA					LOG2 relative levels of GPD1-MS2L mRNA
Strain	Time stress	Assay 1	Assay 2	Assay 3	Average	SD	Assay 1	Assay 2	Assay 3	Average	SD
WT	0	0	0	0	0	0	0	0	0	0	0
	15	7.888	5.21816	8.00052	7.03556	1.28591	5.31217	4.71563	4.94781	4.99187	0.245521
	30	10.4049	9.33078	10.5099	10.0819	0.532818	6.31075	5.28459	6.41015	6.00183	0.508784
	45	6.90071	6.33482	7.51048	6.91534	0.480073	5.09693	4.17505	4.77864	4.68354	0.382313
	60	3.74107	2.45244	3.40896	3.20082	0.546278	3.35953	1.68974	2.96361	2.67096	0.712407
STL1-MS2L	0	0	0		0	0	0	0		0	0
	15	5.32037	4.93014		5.12526	0.195117	3.91784	5.3852		4.65152	0.733683
	30	6.4445	8.08168		7.26309	0.818591	5.6726	6.52983		6.10122	0.428614
	45	3.30673	5.07862		4.19268	0.885948	5.36443	6.05525		5.70984	0.345408
	60	1.50821	1.9643		1.73626	0.228045	4.13447	4.90677		4.52062	0.38615
STL1-MS2L T4	0	0	0		0	0	0	0		0	0
	15	5.47824	4.80206		5.14015	0.338087	4.12571	5.39254		4.75912	0.633418
	30	7.17756	7.60764		7.3926	0.215041	6.06451	6.35759		6.21105	0.14654
	45	4.06871	5.00606		4.53739	0.468674	5.84343	5.48889		5.66616	0.177267
	60	1.92443	1.92585		1.92514	0.000710112	4.49008	4.49395		4.49202	0.00193693
Fig S1D.Percentage native (wt strain) and MS2L tagged STL1 and GPD1 mRNAs associated to polysomes after 30 min of osmotic stress.
		% STL1-MS2L mRNA
Strain	Fraction	Assay 1	Assay 2	Mean	SE
WT	FM	25.1971	13.3127	19.2549	5.94222
	P	74.8029	86.6873	80.7451	5.94222
STL1-MS2L	FM	14.5248	18.6873	16.6061	2.08125
	P	85.4752	81.3127	83.3939	2.08125
Strain	Fraction	% GPD1-MS2L mRNA
WT	FM	10.4095	11.6851	11.0473	0.637793
	P	89.5905	88.253	88.9217	0.668772
GPD1-MS2L	FM	25.2133	27.1777	26.1955	0.982217
	P	74.7867	72.3161	73.5514	1.23529

## Sheet: Fig S2
Fig S2B. Quantification of the percentage of cells with granules and number of granules per cell.
	Control (1 hour SC-MET)								0.6M KCl 30 min (1h 30 min SC-MET)
	w/o CHX				+CHX				w/o CHX				+CHX
Assay 1	Total	1-4 granules	5-9 granules	10 or more granules	Total	1-4 granules	5-9 granules	10 or more granules	Total	1-4 granules	5-9 granules	10 or more granules	Total	1-4 granules	5-9 granules	10 or more granules
STL1-MS2L	0.671141	0.671141	0	0	0.671141	0.671141	0	0	66.6667	30.4762	32.381	3.80952	82.7586	6.89655	18.3908	57.4713
GPD1-MS2L	41.7808	41.7808	0	0	26.087	24.6377	1.44928	0	82.3129	59.1837	23.1293	0	79.562	19.708	30.6569	29.1971
HYP2-MS2L	50	50	0	0	67.0635	51.1905	15.873	0	50	50	0	0	80.8	26.4	41.6	12.8
ASH1-MS2L	13.913	13.913	0	0	32.6633	22.1106	9.54774	1.00503	23.2558	23.2558	0	0	47.5728	29.1262	15.534	2.91262
Assay 2	Total	1-4 granules	5-9 granules	10 or more granules	Total	1-4 granules	5-9 granules	10 or more granules	Total	1-4 granules	5-9 granules	10 or more granules	Total	1-4 granules	5-9 granules	10 or more granules
STL1-MS2L	0	0	0	0	0	0	0	0	69.2308	34.6154	25.8242	8.79121	89.8305	14.6893	29.3785	45.7627
GPD1-MS2L
HYP2-MS2L	47.3214	47.3214	0	0	73.1343	52.2388	20.8955	0	62.0408	62.0408	0	0	92.1986	16.3121	48.9362	26.9504
ASH1-MS2L	16.7421	16.7421	0	0	26.7327	19.802	6.93069	0	32.6667	31.3333	1.33333	0	45.8015	31.2977	13.7405	0.763359
Mean	Total	1-4 granules	5-9 granules	10 or more granules	Total	1-4 granules	5-9 granules	10 or more granules	Total	1-4 granules	5-9 granules	10 or more granules	Total	1-4 granules	5-9 granules	10 or more granules
STL1-MS2L	0.33557	0.33557	0	0	0.33557	0.33557	0	0	67.9487	32.5458	29.1026	6.30037	86.2946	10.7929	23.8847	51.617
GPD1-MS2L	41.7808	41.7808	0	0	26.087	24.6377	1.44928	0	82.3129	59.1837	23.1293	0	79.562	19.708	30.6569	29.1971
HYP2-MS2L	48.6607	48.6607	0	0	70.0989	51.7146	18.3843	0	56.0204	56.0204	0	0	86.4993	21.356	45.2681	19.8752
ASH1-MS2L	15.3276	15.3276	0	0	29.698	20.9563	8.23922	0.502513	27.9612	27.2946	0.666667	0	46.6872	30.212	14.6372	1.83799
Fig S2D. Percentage of Dcp2-RFP foci in strains expressing MS2L-mRNAs. P-value of the student’s t-test between strain without MS2L and MS2L-mRNAs strains is showed.
Strains	Time stress	Assay 1	Assay 2	Assay 3	Mean	SE	p-value
No MS2L	0	10.4651	2.82486		6.64499	3.82013
	15	66.6667	59.3074		62.987	3.67965
	30	56.7227	28.9583		42.8405	13.8822
HYP2-MS2L	0	3.2491	12.5		7.87455	4.62545	0.8566
	15	45.8937	52.9148		49.4043	3.51054	0.1161
	30	47.6341	47.2527		47.4434	0.190661	0.7719
STL1-MS2L	0	1.86916		14.7222	8.29569	5.24724	0.8221
	15	54.267	33.8816	60.2299	49.4595	7.97689	0.2939
	30	50.1109	35.1351	21.4286	35.5582	8.28257	0.6538
GPD1-MS2L	0	6.60377	13.5294		10.0666	3.46282	0.5742
	15	42.9293	60.8365		51.8829	8.9536	0.3697
	30	20.4678	30.6818		25.5748	5.10699	0.3633
ASH1-MS2L	0	8.37
	15	54.17
	30	11.76

## Sheet: Fig S5
Fig S5A. Area under the curve of the polysomes profiles under osmotic stress (0.6 M KCl) in pat1 mutant and wt strains
	0.6M KCl
	0 min		6 min		15 min		30 min
Fraction	FM	P	FM	P	FM	P	FM	P
wt	24.5485	75.4515	64.2686	35.7314	36.9732	63.0268	34.5781	65.4219
pat1	21.515	78.485	33.945	66.055	25.6125	74.3875	18.7751	81.2249
Fig S5B (left panels). Percentage of specific mRNAs in each fraction along the gradient and unbder stress (0.6 M KCl, 0, 6, 15 and 30 min).											Fig S5B (right panels). Ratios between polysomal and sub-polysomal fraction (P/FM) at each time for wt and pat1.
		Fraction	STL1	GPD1	ACT1	PWP1	UTP13	HYP2			Strains	Time stress	Ratio P/FM
WT	0	1			1.62714	5.48112	6.52241	1.41382					STL1	GPD1	ACT1	PWP1	UTP13
		2			1.93806	8.03059	6.71811	5.65977			WT	0			27.0489	6.40099	6.55257
		3			0.75933	2.62382	3.14281	1.73974				6	0.897222	1.10057	9.89014	9.00869	9.97648
		4			1.86545	5.33741	6.70707	8.5468				15	1.05726	2.29341	7.78661	1.68469	1.12278
		5			12.7882	16.7492	19.4349	46.6849				30	6.24739	5.73331	6.5093	0.652242	0.917318
		6			39.3099	19.5103	21.076	22.6104			pat1	0			48.8995	12.44	11.4122
		7			36.2595	35.2633	30.201	12.486				6	0.848227	1.00826	7.16562	7.47686	7.0125
		8			5.4523	7.00428	6.19773	0.858579				15	1.34837	2.16881	6.07168	3.91773	1.70858
	6	1	9.72142	4.88271	2.93056	2.83156	3.47652	5.75743				30	28.3853	20.0203	28.5167	3.81856	2.23943
		2	42.9872	42.7235	6.25206	7.15976	5.63386	30.0482
		3	12.7314	11.3256	7.53756	5.78319	4.49089	9.84562
		4	5.99303	5.13724	6.17873	4.74463	3.81172	9.97722
		5	4.83637	4.07117	8.57905	7.37856	6.51338	15.4757
		6	12.5918	16.0249	29.5546	39.2757	29.0451	15.4757
		7	7.435	11.0822	32.5186	23.7761	34.6304	10.4115
		8	3.70381	4.75261	6.44883	9.05048	12.3981	3.00861
	15	1	3.81712	2.74951	4.27518	18.2757	20.5067	1.91909
		2	44.7912	27.6142	7.10577	18.9726	26.6013	22.1802
		3	7.6674	10.1247	5.77802	7.66652	8.38714	7.534
		4	6.3334	4.01634	2.95162	5.8742	5.658	5.90742
		5	9.41894	8.03207	12.9766	8.95355	11.772	41.7586
		6	10.9642	14.8513	33.9385	22.7802	11.9945	15.9462
		7	7.92359	22.2058	28.0789	10.9021	10.9825	3.57408
		8	9.08416	10.4061	4.89547	6.57509	4.09779	1.18038
	30	1	2.63659	3.39269	5.7051	40.2597	34.6948	4.39897
		2	11.1615	11.4589	7.61173	20.2641	17.4614	16.9552
		3	3.59308	1.69627	1.51407	4.15161	3.36569	4.49218
		4	5.8743	2.64258	2.73227	5.46551	6.52673	5.62752
		5	12.8124	7.36366	15.4918	8.36612	11.8657	28.2995
		6	11.1262	10.0601	24.7135	6.34386	7.68472	19.2511
		7	19.3679	28.5001	30.6626	8.03724	9.1493	14.7413
		8	33.4281	34.8858	11.569	7.11185	9.25168	6.23422
pat1	0	1	1.15652	0.52311	0.860555	3.03395	4.18673	1.38512
		2	0.988926	0.683518	1.14347	4.40655	3.86986	3.28915
		3	0.496103	0.446702	1.86039	3.21672	3.83337	6.48585
		4	0.75777	0.850288	5.62006	8.38777	11.4927	0.00174542
		5	0.830439	1.28375	12.9485	10.0123	10.949	39.7206
		6	0.915252	4.9191	45.7211	33.2345	34.0422	39.9626
		7	0.427916	3.38981	14.5152	23.4483	20.5812	4.99758
		8	94.4271	87.9037	17.3307	14.2599	11.045	4.15738
	6	1	16.0928	8.75659	5.21395	6.23918	5.58738	0.00304818
		2	38.0131	41.0377	7.03251	5.55764	6.89311	30.4941
		3	6.75158	5.86064	2.17039	1.38721	1.52165	3.52514
		4	7.76671	8.71801	4.13426	3.25943	4.57225	11.7546
		5	10.9664	9.40804	7.80397	10.8641	8.35689	22.1454
		6	9.10507	10.9983	23.2456	18.8827	15.2244	21.4309
		7	11.2923	15.0489	44.7119	37.2132	32.6526	8.32604
		8	0.0120063	0.171826	5.68745	16.5966	25.1917	2.32079
	15	1	10.6205	9.50181	4.87444	11.1692	25.0328	5.55938
		2	31.9623	22.0557	9.26646	9.16542	11.8869	23.4406
		3	5.82391	5.05909	4.17005	4.23679	5.76054	8.04943
		4	5.52507	2.40218	4.07338	3.29	2.54633	9.23442
		5	8.88482	7.8754	18.0066	10.9085	9.48808	35.1093
		6	9.33039	10.8799	26.8261	17.5969	10.2094	11.2566
		7	11.8669	28.9803	24.2195	26.0103	23.148	5.47915
		8	15.9861	13.2456	8.56346	17.6228	11.9279	1.87116
	30	1	1.04659	1.50171	1.43122	11.067	16.9266	4.05495
		2	2.35647	3.2556	1.9567	9.68606	13.943	6.49774
		3	2.35068	2.19978	1.43123	4.51868	5.03762	10.7985
		4	3.1763	3.37847	4.4745	5.89722	7.29071	26.4464
		5	9.14257	11.1526	19.4043	14.7218	13.789	28.208
		6	10.2687	21.2696	33.1238	14.307	10.2991	14.2356
		7	32.0962	27.9861	18.8946	17.6622	14.1129	5.14007
		8	39.5625	29.2562	19.2837	22.14	18.601	4.61879

## Sheet: Fig S6
Fig S6. mRNA levels from GFP-tagged strains
		GPD1 mRNA (Increment relative to t=0)									QCR6 mRNA (Increment relative to t=0)
Strain	Time (min)	Assay 1	Assay 2	Assay 3	Assay 4	Mean	SE		Strain	Time (min)	Assay 1	Assay 2	Assay 3	Mean	SE
wt	0	0	0	0	0	0	0		wt	0	0	0	0	0	0
	15	229.766	225.719	111.007	395.292	240.446	58.4969			15	-160.118	-15.0969	1.60657	-57.8695	51.3512
	30	293.423	260.804	80.3252	228.379	215.733	47.0482			30	133.936	123.468	107.951	121.785	7.54814
	60	52.9991	19.5281	12.4873	39.6738	31.1721	9.27992			60	101.399	-41.0258	29.215	29.8627	41.1158
pat1	0	0	0	0	0	0	0		pat1	0	0	0	0	0	0
	15	382.517	508.725	234.203	482.718	402.041	62.21			15	13.347	-65.9491	44.4611	-2.71365	32.8687
	30	425.017	293.193	336.294	1116.19	542.673	193.131			30	250.304	301.742	82.6331	211.56	66.1513
	60	18.1977	153.036	15.6686	45.6455	58.1371	32.3531			60	81.1625	-125.618	16.5524	-9.30093	61.0759
		GPP2 mRNA (Increment relative to t=0)									ENO1 mRNA (Increment relative to t=0)
Strain	Time (min)	Assay 1	Assay 2	Assay 3	Mean	SE			Strain	Time (min)	Assay 1	Assay 2	Assay 3	Mean	SE
wt	0	0	0	0	0	0			wt	0	0	0	0	0	0
	15	132.886	155.275	134.484	140.882	7.21143				15	-342.128	-198	77.7318	-154.132	123.172
	30	349.394	264.849	244.001	286.081	32.2233				30	-303.265	-199.352	20.3372	-160.76	95.3881
	60	272.306	44.2287	56.6351	124.39	74.0445				60	-49.2006	-289.192	58.9522	-93.1468	102.875
pat1	0	0	0	0	0	0			pat1	0	0	0	0	0	0
	15	273.141	265.447	359.951	299.513	30.3005				15	42.8586	-273.336	37.8829	-64.1982	104.579
	30	405.382	340.13	260.964	335.492	41.7543				30	134.425	-349.361	-24.2255	-79.7207	142.387
	60	61.4201	132.827	92.475	95.574	20.6715				60	-20.942	-300.564	-5.34124	-108.949	95.9133
		GRE3mRNA (Increment relative to t=0)									HAC1 mRNA (Increment relative to t=0)
Strain	Time (min)	Assay 1	Assay 2	Assay 3	Mean	SE			Strain	Time (min)	Assay 1	Assay 2	Assay 3	Mean	SE
wt	0	0	0	0	0	0			wt	0	0	0		0	0
	15	79.1074	65.3538	66.157	70.206	4.45671				15	-108.945	1.89371		-53.5256	55.4193
	30	305.117	303.116	299.74	302.658	1.56915				30	80.4637	224.762		152.613	72.149
	60	216.527	111.471	57.9824	128.66	46.568				60	54.4033	66.7279		60.5656	6.1623
pat1	0	0	0	0	0	0			pat1	0	0	0		0	0
	15	73.33	154.194	81.394	102.973	25.7162				15	114.572	425.429		270	155.428
	30	312.754	285.609	365.289	321.217	23.3875				30	303.225	447.059		375.142	71.9168
	60	128.368		103.253	115.811	12.5576				60	110.063	279.002		194.532	84.4696
